# Supplementary material for: Nippostrongylus brasiliensis and Heligmosomoides polygyrus activate different immunomodulatory pathways in murine macrophages in vitro
Source: Research Square preprint supplement (doi:10.21203/rs.3.rs-8017434/v1), 2025-11-21
Supplement: Supplementary file 1 [file 6cb1d8d81baa8789a8d7fa06.xlsx]

## Sheet: Supplementary_Table_1
Comparison (group1/group2)	Group	ProteinGroups	AVG Log2 Ratio	Absolute AVG Log2 Ratio	Pvalue	Qvalue	# of Ratios	UniProtIds	Genes	ProteinDescriptions	ProteinNames	# Unique Total Peptides	% Change	Ratio	Condition Numerator	Condition Denominator	GO Cellular Component	GO Molecular Function	GO Biological Process
Nb / Hp	Q6PAQ4	Q6PAQ4	-1.16283	1.16283	2.83276e-09	5.17545e-06	12	Q6PAQ4	Rexo4	RNA exonuclease 4	REXO4_MOUSE	24	-55.3366	0.446634	Nb	Hp	NaN	NaN	NaN
Nb / Hp	Q9D903	Q9D903	-2.29903	2.29903	2.48677e-09	5.17545e-06	12	Q9D903	Ebna1bp2	Probable rRNA-processing protein EBP2	EBP2_MOUSE	19	-79.68	0.2032	Nb	Hp	NaN	NaN	NaN
Nb / Hp	Q9CRB2	Q9CRB2	-1.05194	1.05194	5.06469e-09	6.16879e-06	12	Q9CRB2	Nhp2	H/ACA ribonucleoprotein complex subunit 2	NHP2_MOUSE	7	-51.7682	0.482318	Nb	Hp	NaN	NaN	NaN
Nb / Hp	Q8BJW5	Q8BJW5	-1.40022	1.40022	8.02331e-09	7.3293e-06	12	Q8BJW5	Nol11	Nucleolar protein 11	NOL11_MOUSE	16	-62.1129	0.378871	Nb	Hp	NaN	NaN	NaN
Nb / Hp	O55057	O55057	2.54104	2.54104	1.81445e-08	1.01254e-05	12	O55057	Pde6d	Retinal rod rhodopsin-sensitive cGMP 3',5'-cyclic phosphodiesterase subunit delta	PDE6D_MOUSE	3	482.008	5.82008	Nb	Hp	NaN	NaN	NaN
Nb / Hp	P00761	P00761	-2.53025	2.53025	3.04814e-08	1.01254e-05	12	NaN	SWISS-PROT:P00761|TRYP_PIG	Trypsin - Sus scrofa (Pig).	NaN	4	-82.6892	0.173108	Nb	Hp	NaN	NaN	NaN
Nb / Hp	P02533	P02533	-1.60776	1.60776	2.29905e-08	1.01254e-05	12	NaN	SWISS-PROT:P02533	Tax_Id=9606 Gene_Symbol=KRT14 Keratin, type I cytoskeletal 14	NaN	44	-67.1893	0.328107	Nb	Hp	NaN	NaN	NaN
Nb / Hp	P30416	P30416	1.60271	1.60271	2.74806e-08	1.01254e-05	12	P30416	Fkbp4	Peptidyl-prolyl cis-trans isomerase FKBP4	FKBP4_MOUSE	33	203.712	3.03712	Nb	Hp	NaN	NaN	NaN
Hp / Control	Q06649	Q06649	3.69583	3.69583	2.85684e-08	1.01254e-05	12	Q06649	Sh3bp2	SH3 domain-binding protein 2	3BP2_MOUSE	2	1195.85	12.9585	Hp	Control	NaN	NaN	NaN
Nb / Hp	Q8BSQ9	Q8BSQ9	-0.801929	0.801929	2.91228e-08	1.01254e-05	12	Q8BSQ9	Pbrm1	Protein polybromo-1	PB1_MOUSE	28	-42.6418	0.573582	Nb	Hp	NaN	NaN	NaN
Nb / Hp	Q9CY50	Q9CY50	-2.12139	2.12139	2.96853e-08	1.01254e-05	12	Q9CY50	Ssr1	Translocon-associated protein subunit alpha	SSRA_MOUSE	3	-77.0175	0.229825	Nb	Hp	NaN	NaN	NaN
Nb / Hp	P13647	P13647	-1.67693	1.67693	3.75238e-08	1.0874e-05	12	NaN	SWISS-PROT:P13647	Tax_Id=9606 Gene_Symbol=KRT5 Keratin, type II cytoskeletal 5	NaN	26	-68.7253	0.312747	Nb	Hp	NaN	NaN	NaN
Nb / Hp	Q922K7	Q922K7	-0.885901	0.885901	4.16628e-08	1.0874e-05	12	Q922K7	Nop2	28S rRNA (cytosine-C(5))-methyltransferase	NOP2_MOUSE	26	-45.8851	0.541149	Nb	Hp	NaN	NaN	NaN
Nb / Hp	Q9DC70	Q9DC70	-0.869973	0.869973	4.07842e-08	1.0874e-05	12	Q9DC70	Ndufs7	NADH dehydrogenase [ubiquinone] iron-sulfur protein 7, mitochondrial	NDUS7_MOUSE	9	-45.2843	0.547157	Nb	Hp	NaN	NaN	NaN
Nb / Hp	Q3UJB0	Q3UJB0	-1.83178	1.83178	4.49087e-08	1.09398e-05	12	Q3UJB0	Sf3b2	Splicing factor 3B subunit 2	SF3B2_MOUSE	35	-71.9081	0.280919	Nb	Hp	NaN	NaN	NaN
Nb / Hp	O89079	O89079	1.83297	1.83297	5.13604e-08	1.17294e-05	12	O89079	Cope	Coatomer subunit epsilon	COPE_MOUSE	7	256.269	3.56269	Nb	Hp	NaN	NaN	NaN
Nb / Hp	Q8K157	Q8K157	2.9952	2.9952	5.54692e-08	1.19226e-05	12	Q8K157	Galm	Galactose mutarotase	GALM_MOUSE	3	697.341	7.97341	Nb	Hp	NaN	NaN	NaN
Nb / Hp	Q60631	Q60631	2.27192	2.27192	6.21363e-08	1.26137e-05	12	Q60631	Grb2	Growth factor receptor-bound protein 2	GRB2_MOUSE	5	382.967	4.82967	Nb	Hp	NaN	NaN	NaN
Nb / Hp	P35527	P35527	-1.76668	1.76668	6.67276e-08	1.28286e-05	12	NaN	SWISS-PROT:P35527	Tax_Id=9606 Gene_Symbol=KRT9 Keratin, type I cytoskeletal 9	NaN	42	-70.6116	0.293884	Nb	Hp	NaN	NaN	NaN
Nb / Hp	P53564	P53564	-1.93478	1.93478	7.28999e-08	1.28286e-05	12	P53564	Cux1	Homeobox protein cut-like 1	CUX1_MOUSE	36	-73.8439	0.261561	Nb	Hp	NaN	NaN	NaN
Nb / Hp	Q921T2	Q921T2	-1.50829	1.50829	7.37278e-08	1.28286e-05	12	Q921T2	Tor1aip1	Torsin-1A-interacting protein 1	TOIP1_MOUSE	19	-64.8473	0.351527	Nb	Hp	NaN	NaN	NaN
Nb / Hp	P07742	P07742	2.0182	2.0182	7.86061e-08	1.30558e-05	12	P07742	Rrm1	Ribonucleoside-diphosphate reductase large subunit	RIR1_MOUSE	31	305.078	4.05078	Nb	Hp	NaN	NaN	NaN
Nb / Control	P30416	P30416	1.69102	1.69102	8.56857e-08	1.36129e-05	12	P30416	Fkbp4	Peptidyl-prolyl cis-trans isomerase FKBP4	FKBP4_MOUSE	33	222.885	3.22885	Nb	Control	NaN	NaN	NaN
Hp / Control	Q0IIK2	Q0IIK2	2.39141	2.39141	1.028e-07	1.46893e-05	12	NaN	TREMBL:Q0IIK2	(Bos taurus) Transferrin	NaN	63	424.668	5.24668	Hp	Control	NaN	NaN	NaN
Nb / Hp	Q8BVA5	Q8BVA5	-1.59193	1.59193	1.04521e-07	1.46893e-05	12	Q8BVA5	Ldah	Lipid droplet-associated hydrolase	LDAH_MOUSE	9	-66.8273	0.331727	Nb	Hp	NaN	NaN	NaN
Nb / Hp	Q8C6B9	Q8C6B9	-1.91294	1.91294	9.87503e-08	1.46893e-05	12	Q8C6B9	Rps19bp1	Active regulator of SIRT1	AROS_MOUSE	8	-73.4449	0.265551	Nb	Hp	NaN	NaN	NaN
Nb / Hp	E9PVX6	E9PVX6	-2.35096	2.35096	1.29227e-07	1.5529e-05	12	E9PVX6	Mki67	Proliferation marker protein Ki-67	KI67_MOUSE	117	-80.3985	0.196015	Nb	Hp	NaN	NaN	NaN
Nb / Hp	O08600	O08600	-0.929257	0.929257	1.32722e-07	1.5529e-05	12	O08600	Endog	Endonuclease G, mitochondrial	NUCG_MOUSE	8	-47.4871	0.525129	Nb	Hp	NaN	NaN	NaN
Nb / Hp	Q64737	Q64737	1.57501	1.57501	1.32202e-07	1.5529e-05	12	Q64737	Gart	Trifunctional purine biosynthetic protein adenosine-3	PUR2_MOUSE	33	197.939	2.97939	Nb	Hp	NaN	NaN	NaN
Nb / Hp	Q6AXC6	Q6AXC6	1.53869	1.53869	1.28976e-07	1.5529e-05	12	Q6AXC6	Ddx11	ATP-dependent DNA helicase DDX11	DDX11_MOUSE	3	190.531	2.90531	Nb	Hp	NaN	NaN	NaN
Nb / Hp	Q8K019	Q8K019	-2.33466	2.33466	1.35995e-07	1.5529e-05	12	Q8K019	Bclaf1	Bcl-2-associated transcription factor 1	BCLF1_MOUSE	22	-80.1758	0.198242	Nb	Hp	NaN	NaN	NaN
Nb / Hp	Q8R2R1	Q8R2R1	-1.09455	1.09455	1.27847e-07	1.5529e-05	12	Q8R2R1	Pomt1	Protein O-mannosyl-transferase 1	POMT1_MOUSE	5	-53.1717	0.468283	Nb	Hp	NaN	NaN	NaN
Nb / Hp	Q3UHX0	Q3UHX0	-2.23788	2.23788	1.6733e-07	1.85279e-05	12	Q3UHX0	Nol8	Nucleolar protein 8	NOL8_MOUSE	7	-78.8002	0.211998	Nb	Hp	NaN	NaN	NaN
Nb / Control	O55057	O55057	1.87945	1.87945	1.91422e-07	1.94293e-05	12	O55057	Pde6d	Retinal rod rhodopsin-sensitive cGMP 3',5'-cyclic phosphodiesterase subunit delta	PDE6D_MOUSE	3	267.935	3.67935	Nb	Control	NaN	NaN	NaN
Nb / Hp	Q9EP72	Q9EP72	-1.74637	1.74637	1.81762e-07	1.94293e-05	12	Q9EP72	Emc7	Endoplasmic reticulum membrane protein complex subunit 7	EMC7_MOUSE	11	-70.195	0.29805	Nb	Hp	NaN	NaN	NaN
Nb / Control	Q9Z2X1	Q9Z2X1	1.38093	1.38093	1.86425e-07	1.94293e-05	12	Q9Z2X1	Hnrnpf	Heterogeneous nuclear ribonucleoprotein F	HNRPF_MOUSE	17	160.436	2.60436	Nb	Control	NaN	NaN	NaN
Nb / Control	Q6PIJ4	Q6PIJ4	-0.57988	0.57988	2.10857e-07	2.08236e-05	12	Q6PIJ4	Nfrkb	Nuclear factor related to kappa-B-binding protein	NFRKB_MOUSE	8	-33.0981	0.669019	Nb	Control	NaN	NaN	NaN
Nb / Hp	B9EJ86	B9EJ86	-0.990926	0.990926	2.35246e-07	2.20407e-05	12	B9EJ86	Osbpl8	Oxysterol-binding protein-related protein 8	OSBL8_MOUSE	20	-49.6845	0.503155	Nb	Hp	NaN	NaN	NaN
Nb / Hp	Q9CRB9	Q9CRB9	-1.3505	1.3505	2.29355e-07	2.20407e-05	12	Q9CRB9	Chchd3	MICOS complex subunit Mic19	MIC19_MOUSE	17	-60.7845	0.392155	Nb	Hp	NaN	NaN	NaN
Nb / Hp	Q3UM45	Q3UM45	1.6122	1.6122	2.46497e-07	2.25175e-05	12	Q3UM45	Ppp1r7	Protein phosphatase 1 regulatory subunit 7	PP1R7_MOUSE	14	205.718	3.05718	Nb	Hp	NaN	NaN	NaN
Nb / Hp	Q922P9	Q922P9	-0.879752	0.879752	2.56038e-07	2.28186e-05	12	Q922P9	Glyr1	Cytokine-like nuclear factor N-PAC	GLYR1_MOUSE	15	-45.6539	0.543461	Nb	Hp	NaN	NaN	NaN
Nb / Hp	Q8BGA9	Q8BGA9	-1.18948	1.18948	2.78184e-07	2.38143e-05	12	Q8BGA9	Oxa1l	Mitochondrial inner membrane protein OXA1L	OXA1L_MOUSE	8	-56.1539	0.438461	Nb	Hp	NaN	NaN	NaN
Nb / Hp	Q922H4	Q922H4	2.51158	2.51158	2.80245e-07	2.38143e-05	12	Q922H4	Gmppa	Mannose-1-phosphate guanylyltransferase regulatory subunit alpha	GMPPA_MOUSE	8	470.244	5.70244	Nb	Hp	NaN	NaN	NaN
Nb / Hp	Q6NZJ6	Q6NZJ6	1.34359	1.34359	2.93789e-07	2.43978e-05	12	Q6NZJ6	Eif4g1	Eukaryotic translation initiation factor 4 gamma 1	IF4G1_MOUSE	38	153.783	2.53783	Nb	Hp	NaN	NaN	NaN
Nb / Hp	A2APB8	A2APB8	-1.98231	1.98231	3.34697e-07	2.49786e-05	12	A2APB8	Tpx2	Targeting protein for Xklp2	TPX2_MOUSE	21	-74.6916	0.253084	Nb	Hp	NaN	NaN	NaN
Nb / Hp	O54790	O54790	-2.13554	2.13554	3.50253e-07	2.49786e-05	12	O54790	Mafg	Transcription factor MafG	MAFG_MOUSE	4	-77.2417	0.227583	Nb	Hp	NaN	NaN	NaN
Nb / Hp	O88630	O88630	-1.53309	1.53309	3.55469e-07	2.49786e-05	12	O88630	Gosr1	Golgi SNAP receptor complex member 1	GOSR1_MOUSE	7	-65.4463	0.345537	Nb	Hp	NaN	NaN	NaN
Nb / Hp	P02769	P02769	-2.38029	2.38029	3.43618e-07	2.49786e-05	12	NaN	SWISS-PROT:P02769	(Bos taurus) Bovine serum albumin precursor	NaN	92	-80.7929	0.192071	Nb	Hp	NaN	NaN	NaN
Nb / Hp	Q0IIK2	Q0IIK2	-2.52587	2.52587	3.49081e-07	2.49786e-05	12	NaN	TREMBL:Q0IIK2	(Bos taurus) Transferrin	NaN	63	-82.6365	0.173635	Nb	Hp	NaN	NaN	NaN
Nb / Hp	Q3TEA8	Q3TEA8	-1.41776	1.41776	3.20795e-07	2.49786e-05	12	Q3TEA8	Hp1bp3	Heterochromatin protein 1-binding protein 3	HP1B3_MOUSE	29	-62.5707	0.374293	Nb	Hp	NaN	NaN	NaN
Nb / Hp	Q8JZN5	Q8JZN5	-0.800183	0.800183	3.39515e-07	2.49786e-05	12	Q8JZN5	Acad9	Complex I assembly factor ACAD9, mitochondrial	ACAD9_MOUSE	30	-42.5724	0.574276	Nb	Hp	NaN	NaN	NaN
Nb / Hp	Q9CQF0	Q9CQF0	-1.23551	1.23551	3.32243e-07	2.49786e-05	12	Q9CQF0	Mrpl11	Large ribosomal subunit protein uL11m	RM11_MOUSE	15	-57.5308	0.424692	Nb	Hp	NaN	NaN	NaN
Nb / Hp	Q8K072	Q8K072	-2.31303	2.31303	3.69914e-07	2.55031e-05	12	Q8K072	Reep4	Receptor expression-enhancing protein 4	REEP4_MOUSE	3	-79.8763	0.201237	Nb	Hp	NaN	NaN	NaN
Nb / Hp	P54775	P54775	1.12997	1.12997	3.93892e-07	2.60862e-05	12	P54775	Psmc4	26S proteasome regulatory subunit 6B	PRS6B_MOUSE	23	118.854	2.18854	Nb	Hp	NaN	NaN	NaN
Nb / Hp	P63017	P63017	0.920495	0.920495	3.94934e-07	2.60862e-05	12	P63017	Hspa8	Heat shock cognate 71 kDa protein	HSP7C_MOUSE	57	89.2764	1.89276	Nb	Hp	NaN	NaN	NaN
Nb / Hp	Q8CAQ8	Q8CAQ8	-0.917459	0.917459	3.99789e-07	2.60862e-05	12	Q8CAQ8	Immt	MICOS complex subunit Mic60	MIC60_MOUSE	58	-47.0559	0.529441	Nb	Hp	NaN	NaN	NaN
Nb / Hp	Q921H8	Q921H8	-1.14239	1.14239	4.08606e-07	2.61938e-05	12	Q921H8	Acaa1a	3-ketoacyl-CoA thiolase A, peroxisomal	THIKA_MOUSE	22	-54.6993	0.453007	Nb	Hp	NaN	NaN	NaN
Nb / Hp	O35435	O35435	-1.19195	1.19195	4.32311e-07	2.72356e-05	12	O35435	Dhodh	Dihydroorotate dehydrogenase (quinone), mitochondrial	PYRD_MOUSE	14	-56.2291	0.437709	Nb	Hp	NaN	NaN	NaN
Nb / Hp	Q7TQ95	Q7TQ95	-1.90672	1.90672	4.47446e-07	2.73704e-05	12	Q7TQ95	Lnpk	Endoplasmic reticulum junction formation protein lunapark	LNP_MOUSE	12	-73.3303	0.266697	Nb	Hp	NaN	NaN	NaN
Nb / Hp	Q921N6	Q921N6	-0.656882	0.656882	4.49431e-07	2.73704e-05	12	Q921N6	Ddx27	Probable ATP-dependent RNA helicase DDX27	DDX27_MOUSE	40	-36.5753	0.634247	Nb	Hp	NaN	NaN	NaN
Nb / Hp	Q9JKX4	Q9JKX4	-1.91916	1.91916	4.61533e-07	2.76466e-05	12	Q9JKX4	Aatf	Protein AATF	AATF_MOUSE	21	-73.5591	0.264409	Nb	Hp	NaN	NaN	NaN
Nb / Hp	P15497	P15497	-1.96984	1.96984	4.71367e-07	2.77802e-05	12	NaN	SWISS-PROT:P15497	(Bos taurus) Apolipoprotein A-I precursor	NaN	35	-74.4719	0.255281	Nb	Hp	NaN	NaN	NaN
Nb / Hp	Q9Z2I0	Q9Z2I0	-1.80522	1.80522	4.80683e-07	2.78796e-05	12	Q9Z2I0	Letm1	Mitochondrial proton/calcium exchanger protein	LETM1_MOUSE	24	-71.3862	0.286138	Nb	Hp	NaN	NaN	NaN
Nb / Hp	Q6ZQL4	Q6ZQL4	-1.25428	1.25428	4.89104e-07	2.79248e-05	12	Q6ZQL4	Wdr43	WD repeat-containing protein 43	WDR43_MOUSE	25	-58.0798	0.419202	Nb	Hp	NaN	NaN	NaN
Nb / Hp	P00978	P00978	-3.29017	3.29017	5.05441e-07	2.82125e-05	12	NaN	SWISS-PROT:P00978	(Bos taurus) AMBP protein precursor	NaN	7	-89.7774	0.102226	Nb	Hp	NaN	NaN	NaN
Nb / Hp	Q80WJ7	Q80WJ7	-2.32998	2.32998	5.09586e-07	2.82125e-05	12	Q80WJ7	Mtdh	Protein LYRIC	LYRIC_MOUSE	21	-80.1113	0.198887	Nb	Hp	NaN	NaN	NaN
Nb / Hp	Q9CZX9	Q9CZX9	-1.82241	1.82241	5.58651e-07	3.04673e-05	12	Q9CZX9	Emc4	ER membrane protein complex subunit 4	EMC4_MOUSE	7	-71.7251	0.282749	Nb	Hp	NaN	NaN	NaN
Nb / Hp	Q8R143	Q8R143	-1.26282	1.26282	6.05433e-07	3.25331e-05	12	Q8R143	Pttg1ip	Pituitary tumor-transforming gene 1 protein-interacting protein	PTTG_MOUSE	4	-58.3271	0.416729	Nb	Hp	NaN	NaN	NaN
Nb / Hp	Q9CYH6	Q9CYH6	-1.10065	1.10065	6.15842e-07	3.26129e-05	12	Q9CYH6	Rrs1	Ribosome biogenesis regulatory protein homolog	RRS1_MOUSE	25	-53.3694	0.466306	Nb	Hp	NaN	NaN	NaN
Nb / Hp	O55143	O55143	-1.10672	1.10672	6.2801e-07	3.27821e-05	12	O55143	Atp2a2	Sarcoplasmic/endoplasmic reticulum calcium ATPase 2	AT2A2_MOUSE	57	-53.5653	0.464347	Nb	Hp	NaN	NaN	NaN
Nb / Hp	Q6NSU3	Q6NSU3	-1.25798	1.25798	6.48402e-07	3.33698e-05	12	Q6NSU3	Glt8d1	Glycosyltransferase 8 domain-containing protein 1	GL8D1_MOUSE	5	-58.1872	0.418128	Nb	Hp	NaN	NaN	NaN
Nb / Hp	Q9JKF1	Q9JKF1	1.49652	1.49652	6.61507e-07	3.35715e-05	12	Q9JKF1	Iqgap1	Ras GTPase-activating-like protein IQGAP1	IQGA1_MOUSE	74	182.162	2.82162	Nb	Hp	NaN	NaN	NaN
Nb / Hp	Q8R2M2	Q8R2M2	-1.95737	1.95737	7.11539e-07	3.51346e-05	12	Q8R2M2	Dnttip2	Deoxynucleotidyltransferase terminal-interacting protein 2	TDIF2_MOUSE	17	-74.2503	0.257497	Nb	Hp	NaN	NaN	NaN
Nb / Hp	Q9ER69	Q9ER69	-1.3711	1.3711	7.09428e-07	3.51346e-05	12	Q9ER69	Wtap	Pre-mRNA-splicing regulator WTAP	FL2D_MOUSE	5	-61.3405	0.386595	Nb	Hp	NaN	NaN	NaN
Nb / Hp	Q80W00	Q80W00	-2.19207	2.19207	7.21245e-07	3.51391e-05	12	Q80W00	Ppp1r10	Serine/threonine-protein phosphatase 1 regulatory subunit 10	PP1RA_MOUSE	14	-78.1162	0.218838	Nb	Hp	NaN	NaN	NaN
Nb / Hp	Q810V0	Q810V0	-2.05949	2.05949	7.42193e-07	3.53449e-05	12	Q810V0	Mphosph10	U3 small nucleolar ribonucleoprotein protein MPP10	MPP10_MOUSE	13	-76.0099	0.239901	Nb	Hp	NaN	NaN	NaN
Nb / Hp	Q99LM2	Q99LM2	-1.48144	1.48144	7.47891e-07	3.53449e-05	12	Q99LM2	Cdk5rap3	CDK5 regulatory subunit-associated protein 3	CK5P3_MOUSE	11	-64.187	0.35813	Nb	Hp	NaN	NaN	NaN
Nb / Hp	Q9CQZ6	Q9CQZ6	-1.14516	1.14516	7.54489e-07	3.53449e-05	12	Q9CQZ6	Ndufb3	NADH dehydrogenase [ubiquinone] 1 beta subcomplex subunit 3	NDUB3_MOUSE	4	-54.7861	0.452139	Nb	Hp	NaN	NaN	NaN
Nb / Hp	Q9D8W5	Q9D8W5	1.42644	1.42644	7.67089e-07	3.54803e-05	12	Q9D8W5	Psmd12	26S proteasome non-ATPase regulatory subunit 12	PSD12_MOUSE	21	168.783	2.68783	Nb	Hp	NaN	NaN	NaN
Nb / Hp	Q8C5Q4	Q8C5Q4	-0.711929	0.711929	7.88765e-07	3.60268e-05	12	Q8C5Q4	Grsf1	G-rich sequence factor 1	GRSF1_MOUSE	11	-38.9497	0.610503	Nb	Hp	NaN	NaN	NaN
Nb / Hp	Q99JB2	Q99JB2	-1.11062	1.11062	8.36221e-07	3.77229e-05	12	Q99JB2	Stoml2	Stomatin-like protein 2, mitochondrial	STML2_MOUSE	20	-53.6906	0.463094	Nb	Hp	NaN	NaN	NaN
Nb / Hp	P43277	P43277	-1.47708	1.47708	8.86273e-07	3.85426e-05	12	P43277	H1-3	Histone H1.3	H13_MOUSE	19	-64.0786	0.359214	Nb	Hp	NaN	NaN	NaN
Nb / Hp	Q8BHS3	Q8BHS3	-1.24863	1.24863	9.07134e-07	3.85426e-05	12	Q8BHS3	Rbm22	Pre-mRNA-splicing factor RBM22	RBM22_MOUSE	13	-57.9152	0.420848	Nb	Hp	NaN	NaN	NaN
Nb / Hp	Q8VDD9	Q8VDD9	-1.16077	1.16077	8.73899e-07	3.85426e-05	12	Q8VDD9	Phip	PH-interacting protein	PHIP_MOUSE	19	-55.2726	0.447274	Nb	Hp	NaN	NaN	NaN
Nb / Hp	Q91W39	Q91W39	-1.16488	1.16488	8.94661e-07	3.85426e-05	12	Q91W39	Ncoa5	Nuclear receptor coactivator 5	NCOA5_MOUSE	17	-55.3998	0.446002	Nb	Hp	NaN	NaN	NaN
Nb / Hp	Q9QY81	Q9QY81	-0.954498	0.954498	9.0264e-07	3.85426e-05	12	Q9QY81	Nup210	Nuclear pore membrane glycoprotein 210	PO210_MOUSE	50	-48.3979	0.516021	Nb	Hp	NaN	NaN	NaN
Nb / Hp	F6ZDS4	F6ZDS4	-0.700635	0.700635	9.24122e-07	3.88131e-05	12	F6ZDS4	Tpr	Nucleoprotein TPR	TPR_MOUSE	94	-38.4699	0.615301	Nb	Hp	NaN	NaN	NaN
Nb / Hp	P37040	P37040	-1.45594	1.45594	9.69817e-07	3.97477e-05	12	P37040	Por	NADPH--cytochrome P450 reductase	NCPR_MOUSE	39	-63.5483	0.364517	Nb	Hp	NaN	NaN	NaN
Nb / Hp	Q99L04	Q99L04	-1.07305	1.07305	9.79008e-07	3.97477e-05	12	Q99L04	Dhrs1	Dehydrogenase/reductase SDR family member 1	DHRS1_MOUSE	15	-52.4687	0.475313	Nb	Hp	NaN	NaN	NaN
Nb / Hp	Q9JIM1	Q9JIM1	-1.28679	1.28679	9.58288e-07	3.97477e-05	12	Q9JIM1	Slc29a1	Equilibrative nucleoside transporter 1	S29A1_MOUSE	5	-59.0139	0.409861	Nb	Hp	NaN	NaN	NaN
Nb / Hp	P43274	P43274	-1.97083	1.97083	1.02598e-06	4.1197e-05	12	P43274	H1-4	Histone H1.4	H14_MOUSE	6	-74.4893	0.255107	Nb	Hp	NaN	NaN	NaN
Nb / Hp	Q80VL1	Q80VL1	-1.43597	1.43597	1.04866e-06	4.16499e-05	12	Q80VL1	Tdrkh	Tudor and KH domain-containing protein	TDRKH_MOUSE	15	-63.0401	0.369599	Nb	Hp	NaN	NaN	NaN
Nb / Hp	Q59J78	Q59J78	-1.54379	1.54379	1.13389e-06	4.4077e-05	12	Q59J78	Ndufaf2	NADH dehydrogenase [ubiquinone] 1 alpha subcomplex assembly factor 2	NDUF2_MOUSE	12	-65.7016	0.342984	Nb	Hp	NaN	NaN	NaN
Nb / Hp	Q60930	Q60930	-0.757788	0.757788	1.12239e-06	4.4077e-05	12	Q60930	Vdac2	Voltage-dependent anion-selective channel protein 2	VDAC2_MOUSE	21	-40.8598	0.591402	Nb	Hp	NaN	NaN	NaN
Nb / Hp	P43406	P43406	-1.55038	1.55038	1.17344e-06	4.46508e-05	12	P43406	Itgav	Integrin alpha-V	ITAV_MOUSE	33	-65.8579	0.341421	Nb	Hp	NaN	NaN	NaN
Nb / Hp	Q9CR68	Q9CR68	-1.51367	1.51367	1.17881e-06	4.46508e-05	12	Q9CR68	Uqcrfs1	Cytochrome b-c1 complex subunit Rieske, mitochondrial	UCRI_MOUSE	13	-64.978	0.35022	Nb	Hp	NaN	NaN	NaN
Nb / Hp	Q9D1J3	Q9D1J3	-2.53204	2.53204	1.18531e-06	4.46508e-05	12	Q9D1J3	Sarnp	SAP domain-containing ribonucleoprotein	SARNP_MOUSE	11	-82.7106	0.172894	Nb	Hp	NaN	NaN	NaN
Nb / Hp	Q8BGQ7	Q8BGQ7	1.56591	1.56591	1.19829e-06	4.46549e-05	12	Q8BGQ7	Aars1	Alanine--tRNA ligase, cytoplasmic	SYAC_MOUSE	33	196.065	2.96065	Nb	Hp	NaN	NaN	NaN
Nb / Hp	Q9D0R4	Q9D0R4	-0.726917	0.726917	1.20986e-06	4.46549e-05	12	Q9D0R4	Ddx56	Probable ATP-dependent RNA helicase DDX56	DDX56_MOUSE	19	-39.5806	0.604194	Nb	Hp	NaN	NaN	NaN
Nb / Hp	P45377	P45377	1.63255	1.63255	1.2304e-06	4.47283e-05	12	P45377	Akr1b8	Aldose reductase-related protein 2	ALD2_MOUSE	13	210.06	3.1006	Nb	Hp	NaN	NaN	NaN
Nb / Hp	P51859	P51859	1.26695	1.26695	1.23633e-06	4.47283e-05	12	P51859	Hdgf	Hepatoma-derived growth factor	HDGF_MOUSE	6	140.651	2.40651	Nb	Hp	NaN	NaN	NaN
Nb / Hp	Q9QY76	Q9QY76	-2.17048	2.17048	1.25549e-06	4.49762e-05	12	Q9QY76	Vapb	Vesicle-associated membrane protein-associated protein B	VAPB_MOUSE	10	-77.7863	0.222137	Nb	Hp	NaN	NaN	NaN
Nb / Hp	P60710	P60710	0.6763	0.6763	1.26868e-06	4.50073e-05	12	P60710	Actb	Actin, cytoplasmic 1	ACTB_MOUSE	34	59.8036	1.59804	Nb	Hp	NaN	NaN	NaN
Nb / Hp	D3YXK2	D3YXK2	-1.42487	1.42487	1.38736e-06	4.828e-05	12	D3YXK2	Safb	Scaffold attachment factor B1	SAFB1_MOUSE	23	-62.7547	0.372453	Nb	Hp	NaN	NaN	NaN
Nb / Hp	Q9CY57	Q9CY57	-1.85558	1.85558	1.38339e-06	4.828e-05	12	Q9CY57	Chtop	Chromatin target of PRMT1 protein	CHTOP_MOUSE	5	-72.3678	0.276322	Nb	Hp	NaN	NaN	NaN
Nb / Hp	P47713	P47713	0.754364	0.754364	1.42373e-06	4.90784e-05	12	P47713	Pla2g4a	Cytosolic phospholipase A2	PA24A_MOUSE	32	68.6887	1.68689	Nb	Hp	NaN	NaN	NaN
Nb / Hp	C0HKD8;C0HKD9	C0HKD8;C0HKD9	-1.78056	1.78056	1.4726e-06	4.93222e-05	12	C0HKD8;C0HKD9	Mfap1a;Mfap1b	Microfibrillar-associated protein 1A;Microfibrillar-associated protein 1B	MFA1A_MOUSE;MFA1B_MOUSE	7	-70.8929	0.291071	Nb	Hp	NaN	NaN	NaN
Nb / Hp	Q8R149	Q8R149	-1.81759	1.81759	1.51179e-06	4.93222e-05	12	Q8R149	Bud13	BUD13 homolog	BUD13_MOUSE	2	-71.6306	0.283694	Nb	Hp	NaN	NaN	NaN
Nb / Hp	Q9CQA3	Q9CQA3	-1.05717	1.05717	1.50822e-06	4.93222e-05	12	Q9CQA3	Sdhb	Succinate dehydrogenase [ubiquinone] iron-sulfur subunit, mitochondrial	SDHB_MOUSE	17	-51.9427	0.480573	Nb	Hp	NaN	NaN	NaN
Nb / Hp	Q9D7Z3	Q9D7Z3	-3.13195	3.13195	1.45671e-06	4.93222e-05	12	Q9D7Z3	Nol7	U3 small nucleolar RNA-associated protein NOL7	UTP16_MOUSE	5	-88.5925	0.114075	Nb	Hp	NaN	NaN	NaN
Nb / Hp	Q9DCC8	Q9DCC8	-1.76985	1.76985	1.50971e-06	4.93222e-05	12	Q9DCC8	Tomm20	Mitochondrial import receptor subunit TOM20 homolog	TOM20_MOUSE	4	-70.676	0.29324	Nb	Hp	NaN	NaN	NaN
Nb / Hp	Q9Z2Z6	Q9Z2Z6	-1.22797	1.22797	1.46623e-06	4.93222e-05	12	Q9Z2Z6	Slc25a20	Mitochondrial carnitine/acylcarnitine carrier protein	MCAT_MOUSE	11	-57.3083	0.426917	Nb	Hp	NaN	NaN	NaN
Nb / Hp	P80317	P80317	1.15879	1.15879	1.56756e-06	5.04856e-05	12	P80317	Cct6a	T-complex protein 1 subunit zeta	TCPZ_MOUSE	22	123.271	2.23271	Nb	Hp	NaN	NaN	NaN
Nb / Hp	Q6NZF1	Q6NZF1	-2.50181	2.50181	1.5889e-06	5.04856e-05	12	Q6NZF1	Zc3h11a	Zinc finger CCCH domain-containing protein 11A	ZC11A_MOUSE	27	-82.3445	0.176555	Nb	Hp	NaN	NaN	NaN
Nb / Hp	Q9JIH2	Q9JIH2	-2.24415	2.24415	1.57767e-06	5.04856e-05	12	Q9JIH2	Nup50	Nuclear pore complex protein Nup50	NUP50_MOUSE	12	-78.8922	0.211078	Nb	Hp	NaN	NaN	NaN
Nb / Hp	P07901	P07901	1.65118	1.65118	1.63004e-06	5.09133e-05	12	P07901	Hsp90aa1	Heat shock protein HSP 90-alpha	HS90A_MOUSE	39	214.09	3.1409	Nb	Hp	NaN	NaN	NaN
Nb / Hp	P15864	P15864	-1.55661	1.55661	1.63023e-06	5.09133e-05	12	P15864	H1-2	Histone H1.2	H12_MOUSE	5	-66.0052	0.339948	Nb	Hp	NaN	NaN	NaN
Nb / Hp	Q5RJG1	Q5RJG1	-1.08087	1.08087	1.65896e-06	5.13716e-05	12	Q5RJG1	Nol10	Nucleolar protein 10	NOL10_MOUSE	18	-52.7255	0.472745	Nb	Hp	NaN	NaN	NaN
Nb / Control	Q9JJ80	Q9JJ80	-0.942346	0.942346	1.72242e-06	5.28883e-05	12	Q9JJ80	Rpf2	Ribosome production factor 2 homolog	RPF2_MOUSE	18	-47.9614	0.520386	Nb	Control	NaN	NaN	NaN
Nb / Control	Q9Z0P5	Q9Z0P5	1.39811	1.39811	1.78958e-06	5.44928e-05	12	Q9Z0P5	Twf2	Twinfilin-2	TWF2_MOUSE	14	163.557	2.63557	Nb	Control	NaN	NaN	NaN
Nb / Hp	Q8K183	Q8K183	2.22449	2.22449	1.81822e-06	5.47404e-05	12	Q8K183	Pdxk	Pyridoxal kinase	PDXK_MOUSE	10	367.346	4.67346	Nb	Hp	NaN	NaN	NaN
Nb / Hp	Q9CQC7	Q9CQC7	-1.92332	1.92332	1.82768e-06	5.47404e-05	12	Q9CQC7	Ndufb4	NADH dehydrogenase [ubiquinone] 1 beta subcomplex subunit 4	NDUB4_MOUSE	7	-73.6352	0.263648	Nb	Hp	NaN	NaN	NaN
Nb / Hp	Q80UU9	Q80UU9	-1.10564	1.10564	1.87671e-06	5.53023e-05	12	Q80UU9	Pgrmc2	Membrane-associated progesterone receptor component 2	PGRC2_MOUSE	6	-53.5302	0.464698	Nb	Hp	NaN	NaN	NaN
Nb / Control	Q9D1D4	Q9D1D4	-0.588198	0.588198	1.87191e-06	5.53023e-05	12	Q9D1D4	Tmed10	Transmembrane emp24 domain-containing protein 10	TMEDA_MOUSE	15	-33.4827	0.665173	Nb	Control	NaN	NaN	NaN
Nb / Hp	Q8VE37	Q8VE37	-1.3175	1.3175	1.91315e-06	5.59251e-05	12	Q8VE37	Rcc1	Regulator of chromosome condensation	RCC1_MOUSE	17	-59.877	0.40123	Nb	Hp	NaN	NaN	NaN
Nb / Hp	Q04695	Q04695	-1.62201	1.62201	1.92903e-06	5.59419e-05	12	NaN	SWISS-PROT:Q04695	Tax_Id=9606 Gene_Symbol=KRT17 Keratin, type I cytoskeletal 17	NaN	14	-67.5118	0.324882	Nb	Hp	NaN	NaN	NaN
Nb / Hp	Q9CQY6	Q9CQY6	-1.60019	1.60019	1.98751e-06	5.71838e-05	12	Q9CQY6	Uqcc2	Ubiquinol-cytochrome c reductase complex assembly factor 2	UQCC2_MOUSE	6	-67.0166	0.329834	Nb	Hp	NaN	NaN	NaN
Nb / Hp	Q8BJ71	Q8BJ71	-0.79816	0.79816	2.0981e-06	5.98941e-05	12	Q8BJ71	Nup93	Nuclear pore complex protein Nup93	NUP93_MOUSE	54	-42.4918	0.575082	Nb	Hp	NaN	NaN	NaN
Nb / Hp	Q9ERA6	Q9ERA6	-0.508204	0.508204	2.12467e-06	6.01826e-05	12	Q9ERA6	Tfip11	Tuftelin-interacting protein 11	TFP11_MOUSE	18	-29.6903	0.703097	Nb	Hp	NaN	NaN	NaN
Nb / Hp	Q9Z277	Q9Z277	-1.04111	1.04111	2.21095e-06	6.21448e-05	12	Q9Z277	Baz1b	Tyrosine-protein kinase BAZ1B	BAZ1B_MOUSE	46	-51.4047	0.485953	Nb	Hp	NaN	NaN	NaN
Nb / Hp	P14733	P14733	-1.13379	1.13379	2.31086e-06	6.44096e-05	12	P14733	Lmnb1	Lamin-B1	LMNB1_MOUSE	66	-54.4284	0.455716	Nb	Hp	NaN	NaN	NaN
Nb / Hp	Q9CRD0	Q9CRD0	-1.75153	1.75153	2.32678e-06	6.44096e-05	12	Q9CRD0	Ociad1	OCIA domain-containing protein 1	OCAD1_MOUSE	17	-70.3014	0.296986	Nb	Hp	NaN	NaN	NaN
Nb / Hp	Q8CGZ0	Q8CGZ0	-1.04855	1.04855	2.41933e-06	6.54283e-05	12	Q8CGZ0	Cherp	Calcium homeostasis endoplasmic reticulum protein	CHERP_MOUSE	12	-51.6547	0.483453	Nb	Hp	NaN	NaN	NaN
Nb / Hp	Q8K304	Q8K304	-2.85869	2.85869	2.42119e-06	6.54283e-05	12	Q8K304	Tmem129	E3 ubiquitin-protein ligase TM129	TM129_MOUSE	2	-86.2137	0.137863	Nb	Hp	NaN	NaN	NaN
Nb / Hp	Q8R3C6	Q8R3C6	-1.30355	1.30355	2.43521e-06	6.54283e-05	12	Q8R3C6	Rbm19	Probable RNA-binding protein 19	RBM19_MOUSE	26	-59.4873	0.405127	Nb	Hp	NaN	NaN	NaN
Nb / Hp	Q91ZV0	Q91ZV0	-1.65184	1.65184	2.41137e-06	6.54283e-05	12	Q91ZV0	Mia2	Melanoma inhibitory activity protein 2	MIA2_MOUSE	24	-68.1765	0.318235	Nb	Hp	NaN	NaN	NaN
Nb / Hp	Q8C0E2	Q8C0E2	1.72205	1.72205	2.50278e-06	6.58957e-05	12	Q8C0E2	Vps26b	Vacuolar protein sorting-associated protein 26B	VP26B_MOUSE	4	229.905	3.29905	Nb	Hp	NaN	NaN	NaN
Nb / Hp	Q91V61	Q91V61	-1.22729	1.22729	2.51242e-06	6.58957e-05	12	Q91V61	Sfxn3	Sideroflexin-3	SFXN3_MOUSE	12	-57.288	0.42712	Nb	Hp	NaN	NaN	NaN
Nb / Hp	Q922Q4	Q922Q4	-0.432528	0.432528	2.49398e-06	6.58957e-05	12	Q922Q4	Pycr2	Pyrroline-5-carboxylate reductase 2	P5CR2_MOUSE	15	-25.9038	0.740962	Nb	Hp	NaN	NaN	NaN
Nb / Hp	Q9CQ22	Q9CQ22	-1.67097	1.67097	2.52474e-06	6.58957e-05	12	Q9CQ22	Lamtor1	Ragulator complex protein LAMTOR1	LTOR1_MOUSE	8	-68.5959	0.314041	Nb	Hp	NaN	NaN	NaN
Nb / Hp	Q8K310	Q8K310	-1.72822	1.72822	2.60709e-06	6.75626e-05	12	Q8K310	Matr3	Matrin-3	MATR3_MOUSE	37	-69.8176	0.301824	Nb	Hp	NaN	NaN	NaN
Nb / Hp	Q9CZ13	Q9CZ13	-1.2256	1.2256	2.6799e-06	6.89603e-05	12	Q9CZ13	Uqcrc1	Cytochrome b-c1 complex subunit 1, mitochondrial	QCR1_MOUSE	22	-57.2379	0.427621	Nb	Hp	NaN	NaN	NaN
Nb / Hp	P23116	P23116	1.27025	1.27025	2.85822e-06	7.20272e-05	12	P23116	Eif3a	Eukaryotic translation initiation factor 3 subunit A	EIF3A_MOUSE	64	141.204	2.41204	Nb	Hp	NaN	NaN	NaN
Nb / Hp	P43276	P43276	-1.61042	1.61042	2.82001e-06	7.20272e-05	12	P43276	H1-5	Histone H1.5	H15_MOUSE	14	-67.2497	0.327503	Nb	Hp	NaN	NaN	NaN
Nb / Hp	Q9CZW5	Q9CZW5	-1.4703	1.4703	2.84681e-06	7.20272e-05	12	Q9CZW5	Tomm70	Mitochondrial import receptor subunit TOM70	TOM70_MOUSE	27	-63.9092	0.360908	Nb	Hp	NaN	NaN	NaN
Nb / Hp	Q9D938	Q9D938	-0.874165	0.874165	2.99507e-06	7.49588e-05	12	Q9D938	Tmem160	Transmembrane protein 160	TM160_MOUSE	3	-45.4431	0.545569	Nb	Hp	NaN	NaN	NaN
Nb / Hp	Q6KB66-1	Q6KB66-1	-0.839149	0.839149	3.10668e-06	7.72233e-05	12	NaN	SWISS-PROT:Q6KB66-1	Tax_Id=9606 Gene_Symbol=KRT80 Isoform 1 of Keratin, type II cytoskeletal 80	NaN	6	-44.1027	0.558973	Nb	Hp	NaN	NaN	NaN
Hp / Control	P48036	P48036	-0.578521	0.578521	3.36694e-06	7.91624e-05	12	P48036	Anxa5	Annexin A5	ANXA5_MOUSE	30	-33.035	0.66965	Hp	Control	NaN	NaN	NaN
Nb / Hp	Q8BGA5	Q8BGA5	-1.07662	1.07662	3.24111e-06	7.91624e-05	12	Q8BGA5	Krr1	KRR1 small subunit processome component homolog	KRR1_MOUSE	14	-52.5861	0.474139	Nb	Hp	NaN	NaN	NaN
Nb / Hp	Q8CCJ3	Q8CCJ3	-0.894237	0.894237	3.33942e-06	7.91624e-05	12	Q8CCJ3	Ufl1	E3 UFM1-protein ligase 1	UFL1_MOUSE	28	-46.1968	0.538032	Nb	Hp	NaN	NaN	NaN
Nb / Hp	Q8JZQ2	Q8JZQ2	-1.33564	1.33564	3.37937e-06	7.91624e-05	12	Q8JZQ2	Afg3l2	Mitochondrial inner membrane m-AAA protease component AFG3L2	AFG32_MOUSE	27	-60.3782	0.396218	Nb	Hp	NaN	NaN	NaN
Nb / Hp	Q8R2X8	Q8R2X8	-1.66896	1.66896	3.32381e-06	7.91624e-05	12	Q8R2X8	Blzf1	Golgin-45	GO45_MOUSE	3	-68.5521	0.314479	Nb	Hp	NaN	NaN	NaN
Nb / Hp	Q91V09	Q91V09	2.14239	2.14239	3.24532e-06	7.91624e-05	12	Q91V09	Wdr13	WD repeat-containing protein 13	WDR13_MOUSE	3	341.493	4.41493	Nb	Hp	NaN	NaN	NaN
Nb / Hp	Q9CQS8	Q9CQS8	-1.74766	1.74766	3.37968e-06	7.91624e-05	12	Q9CQS8	Sec61b	Protein transport protein Sec61 subunit beta	SC61B_MOUSE	3	-70.2216	0.297784	Nb	Hp	NaN	NaN	NaN
Nb / Hp	Q9CWX4	Q9CWX4	-0.653247	0.653247	3.3777e-06	7.91624e-05	12	Q9CWX4	Rpusd4	Pseudouridylate synthase RPUSD4, mitochondrial	RUSD4_MOUSE	8	-36.4152	0.635848	Nb	Hp	NaN	NaN	NaN
Nb / Hp	Q9JJ80	Q9JJ80	-0.771316	0.771316	3.35581e-06	7.91624e-05	12	Q9JJ80	Rpf2	Ribosome production factor 2 homolog	RPF2_MOUSE	18	-41.4117	0.585883	Nb	Hp	NaN	NaN	NaN
Nb / Hp	Q9D1I6	Q9D1I6	-1.36906	1.36906	3.44673e-06	8.00953e-05	12	Q9D1I6	Mrpl14	Large ribosomal subunit protein uL14m	RM14_MOUSE	6	-61.2858	0.387142	Nb	Hp	NaN	NaN	NaN
Nb / Hp	Q9D880	Q9D880	-0.965577	0.965577	3.46335e-06	8.00953e-05	12	Q9D880	Timm50	Mitochondrial import inner membrane translocase subunit TIM50	TIM50_MOUSE	16	-48.7927	0.512073	Nb	Hp	NaN	NaN	NaN
Nb / Hp	P47753	P47753	1.12229	1.12229	3.57996e-06	8.12494e-05	12	P47753	Capza1	F-actin-capping protein subunit alpha-1	CAZA1_MOUSE	11	117.692	2.17692	Nb	Hp	NaN	NaN	NaN
Nb / Hp	Q02819	Q02819	-1.59212	1.59212	3.56018e-06	8.12494e-05	12	Q02819	Nucb1	Nucleobindin-1	NUCB1_MOUSE	8	-66.8317	0.331683	Nb	Hp	NaN	NaN	NaN
Nb / Hp	Q3U9G9	Q3U9G9	-0.927902	0.927902	3.54823e-06	8.12494e-05	12	Q3U9G9	Lbr	Delta(14)-sterol reductase LBR	LBR_MOUSE	28	-47.4378	0.525622	Nb	Hp	NaN	NaN	NaN
Nb / Hp	P00920	P00920	2.8017	2.8017	3.61726e-06	8.15894e-05	12	P00920	Ca2	Carbonic anhydrase 2	CAH2_MOUSE	8	597.263	6.97263	Nb	Hp	NaN	NaN	NaN
Nb / Hp	P49722	P49722	2.04655	2.04655	3.64532e-06	8.17177e-05	12	P49722	Psma2	Proteasome subunit alpha type-2	PSA2_MOUSE	11	313.116	4.13116	Nb	Hp	NaN	NaN	NaN
Nb / Hp	P35821	P35821	-1.30582	1.30582	3.69077e-06	8.17338e-05	12	P35821	Ptpn1	Tyrosine-protein phosphatase non-receptor type 1	PTN1_MOUSE	15	-59.5509	0.404491	Nb	Hp	NaN	NaN	NaN
Nb / Hp	P70452	P70452	-1.58838	1.58838	3.67309e-06	8.17338e-05	12	P70452	Stx4	Syntaxin-4	STX4_MOUSE	6	-66.7454	0.332546	Nb	Hp	NaN	NaN	NaN
Nb / Hp	O35129	O35129	-0.718143	0.718143	3.77256e-06	8.25445e-05	12	O35129	Phb2	Prohibitin-2	PHB2_MOUSE	28	-39.2121	0.607879	Nb	Hp	NaN	NaN	NaN
Hp / Control	Q9D7H3	Q9D7H3	-0.815213	0.815213	3.75745e-06	8.25445e-05	12	Q9D7H3	RtcA	RNA 3'-terminal phosphate cyclase	RTCA_MOUSE	8	-43.1676	0.568324	Hp	Control	NaN	NaN	NaN
Nb / Hp	Q6NXH9;Q6NXH9	Q6NXH9	-3.63982	3.63982	3.82187e-06	8.28386e-05	12	NaN	TREMBL:Q6NXH9	Tax_Id=10090 Gene_Symbol=Krt73 Keratin 73	NaN	2	-91.9776	0.080224	Nb	Hp	NaN	NaN	NaN
Nb / Hp	Q99KQ4	Q99KQ4	2.14197	2.14197	3.83134e-06	8.28386e-05	12	Q99KQ4	Nampt	Nicotinamide phosphoribosyltransferase	NAMPT_MOUSE	15	341.364	4.41364	Nb	Hp	NaN	NaN	NaN
Nb / Hp	Q640M1	Q640M1	-1.85063	1.85063	3.91204e-06	8.31357e-05	12	Q640M1	Utp14a	U3 small nucleolar RNA-associated protein 14 homolog A	UT14A_MOUSE	26	-72.2728	0.277272	Nb	Hp	NaN	NaN	NaN
Nb / Hp	Q8BUI3	Q8BUI3	-1.06673	1.06673	3.90568e-06	8.31357e-05	12	Q8BUI3	LRWD1	Leucine-rich repeat and WD repeat-containing protein 1	LRWD1_MOUSE	12	-52.2602	0.477398	Nb	Hp	NaN	NaN	NaN
Nb / Hp	Q99LI2	Q99LI2	-1.15447	1.15447	3.91334e-06	8.31357e-05	12	Q99LI2	Clcc1	Chloride channel CLIC-like protein 1	CLCC1_MOUSE	17	-55.0768	0.449232	Nb	Hp	NaN	NaN	NaN
Hp / Control	Q9D1J3	Q9D1J3	2.83344	2.83344	3.9376e-06	8.31676e-05	12	Q9D1J3	Sarnp	SAP domain-containing ribonucleoprotein	SARNP_MOUSE	11	612.773	7.12773	Hp	Control	NaN	NaN	NaN
Nb / Hp	Q91YI0	Q91YI0	2.09881	2.09881	4.01498e-06	8.43145e-05	12	Q91YI0	Asl	Argininosuccinate lyase	ARLY_MOUSE	8	328.355	4.28355	Nb	Hp	NaN	NaN	NaN
Nb / Hp	Q9JLR1	Q9JLR1	-0.985739	0.985739	4.05646e-06	8.46989e-05	12	Q9JLR1	Sec61a2	Protein transport protein Sec61 subunit alpha isoform 2	S61A2_MOUSE	7	-49.5033	0.504967	Nb	Hp	NaN	NaN	NaN
Nb / Hp	E9Q7G0	E9Q7G0	-1.19001	1.19001	4.25274e-06	8.63306e-05	12	E9Q7G0	Numa1	Nuclear mitotic apparatus protein 1	NUMA1_MOUSE	94	-56.1701	0.438299	Nb	Hp	NaN	NaN	NaN
Nb / Control	P02769	P02769	-1.59375	1.59375	4.25124e-06	8.63306e-05	12	NaN	SWISS-PROT:P02769	(Bos taurus) Bovine serum albumin precursor	NaN	92	-66.8691	0.331309	Nb	Control	NaN	NaN	NaN
Nb / Hp	P47791	P47791	1.89427	1.89427	4.18859e-06	8.63306e-05	12	P47791	Gsr	Glutathione reductase, mitochondrial	GSHR_MOUSE	14	271.734	3.71734	Nb	Hp	NaN	NaN	NaN
Hp / Control	Q499X9	Q499X9	-1.84349	1.84349	4.21048e-06	8.63306e-05	12	Q499X9	Mars2	Methionine--tRNA ligase, mitochondrial	SYMM_MOUSE	9	-72.1353	0.278647	Hp	Control	NaN	NaN	NaN
Nb / Hp	Q91XE8	Q91XE8	-1.39773	1.39773	4.20977e-06	8.63306e-05	12	Q91XE8	Tmem205	Transmembrane protein 205	TM205_MOUSE	3	-62.0475	0.379525	Nb	Hp	NaN	NaN	NaN
Hp / Control	Q7TSH6	Q7TSH6	1.42525	1.42525	4.41168e-06	8.80891e-05	12	Q7TSH6	Scaf4	SR-related and CTD-associated factor 4	SCAF4_MOUSE	2	168.56	2.6856	Hp	Control	NaN	NaN	NaN
Nb / Hp	Q8VE70	Q8VE70	1.30104	1.30104	4.39921e-06	8.80891e-05	12	Q8VE70	Pdcd10	Programmed cell death protein 10	PDC10_MOUSE	7	146.407	2.46407	Nb	Hp	NaN	NaN	NaN
Nb / Hp	Q9EPE9	Q9EPE9	-1.35616	1.35616	4.40734e-06	8.80891e-05	12	Q9EPE9	Atp13a1	Endoplasmic reticulum transmembrane helix translocase	AT131_MOUSE	29	-60.938	0.39062	Nb	Hp	NaN	NaN	NaN
Nb / Hp	Q8C166	Q8C166	1.51393	1.51393	4.45531e-06	8.83986e-05	12	Q8C166	Cpne1	Copine-1	CPNE1_MOUSE	9	185.588	2.85588	Nb	Hp	NaN	NaN	NaN
Nb / Hp	Q921E2	Q921E2	-1.04649	1.04649	4.49977e-06	8.83986e-05	12	Q921E2	Rab31	Ras-related protein Rab-31	RAB31_MOUSE	9	-51.5855	0.484145	Nb	Hp	NaN	NaN	NaN
Nb / Hp	Q9EQ61	Q9EQ61	-0.941605	0.941605	4.48188e-06	8.83986e-05	12	Q9EQ61	Pes1	Pescadillo homolog	PESC_MOUSE	26	-47.9347	0.520653	Nb	Hp	NaN	NaN	NaN
Nb / Control	P00920	P00920	2.30377	2.30377	4.58985e-06	8.84249e-05	12	P00920	Ca2	Carbonic anhydrase 2	CAH2_MOUSE	8	393.745	4.93745	Nb	Control	NaN	NaN	NaN
Nb / Hp	P70295	P70295	-1.11268	1.11268	4.59103e-06	8.84249e-05	12	P70295	Aup1	Lipid droplet-regulating VLDL assembly factor AUP1	AUP1_MOUSE	19	-53.7565	0.462435	Nb	Hp	NaN	NaN	NaN
Nb / Hp	Q03265	Q03265	-0.952534	0.952534	4.6463e-06	8.84249e-05	12	Q03265	Atp5f1a	ATP synthase subunit alpha, mitochondrial	ATPA_MOUSE	46	-48.3276	0.516724	Nb	Hp	NaN	NaN	NaN
Nb / Hp	Q8BHN0	Q8BHN0	-2.11646	2.11646	4.62622e-06	8.84249e-05	12	Q8BHN0	Ppm1l	Protein phosphatase 1L	PPM1L_MOUSE	4	-76.9388	0.230612	Nb	Hp	NaN	NaN	NaN
Nb / Hp	Q921S7	Q921S7	-0.631695	0.631695	4.63889e-06	8.84249e-05	12	Q921S7	Mrpl37	Large ribosomal subunit protein mL37	RM37_MOUSE	17	-35.4582	0.645418	Nb	Hp	NaN	NaN	NaN
Nb / Hp	Q9QUN7	Q9QUN7	-0.983973	0.983973	4.63586e-06	8.84249e-05	12	Q9QUN7	Tlr2	Toll-like receptor 2	TLR2_MOUSE	24	-49.4414	0.505586	Nb	Hp	NaN	NaN	NaN
Nb / Hp	Q61733	Q61733	-1.08246	1.08246	4.78741e-06	9.06384e-05	12	Q61733	Mrps31	Small ribosomal subunit protein mS31	RT31_MOUSE	8	-52.7777	0.472223	Nb	Hp	NaN	NaN	NaN
Nb / Hp	P62918	P62918	0.806348	0.806348	4.84924e-06	9.12057e-05	12	P62918	Rpl8	Large ribosomal subunit protein uL2	RL8_MOUSE	18	74.8779	1.74878	Nb	Hp	NaN	NaN	NaN
Nb / Hp	Q9D0M3	Q9D0M3	-1.21574	1.21574	4.8673e-06	9.12057e-05	12	Q9D0M3	Cyc1	Cytochrome c1, heme protein, mitochondrial	CY1_MOUSE	12	-56.9448	0.430552	Nb	Hp	NaN	NaN	NaN
Nb / Hp	Q9CQ69	Q9CQ69	-0.866728	0.866728	5.03932e-06	9.39472e-05	12	Q9CQ69	Uqcrq	Cytochrome b-c1 complex subunit 8	QCR8_MOUSE	8	-45.1611	0.548389	Nb	Hp	NaN	NaN	NaN
Nb / Hp	P26039	P26039	1.26763	1.26763	5.14201e-06	9.44167e-05	12	P26039	Tln1	Talin-1	TLN1_MOUSE	98	140.766	2.40766	Nb	Hp	NaN	NaN	NaN
Nb / Hp	Q99N16	Q99N16	-2.08438	2.08438	5.13776e-06	9.44167e-05	12	Q99N16	Cyp4f3	Cytochrome P450 4F3	CP4F3_MOUSE	2	-76.4203	0.235797	Nb	Hp	NaN	NaN	NaN
Nb / Hp	Q9DBE9	Q9DBE9	-1.15291	1.15291	5.13191e-06	9.44167e-05	12	Q9DBE9	Ftsj3	pre-rRNA 2'-O-ribose RNA methyltransferase FTSJ3	SPB1_MOUSE	31	-55.0283	0.449717	Nb	Hp	NaN	NaN	NaN
Nb / Hp	Q921W4	Q921W4	2.42678	2.42678	5.18269e-06	9.46877e-05	12	Q921W4	Cryzl1	Quinone oxidoreductase-like protein 1	QORL1_MOUSE	3	437.691	5.37691	Nb	Hp	NaN	NaN	NaN
Nb / Hp	P04259	P04259	-1.59792	1.59792	5.32954e-06	9.68863e-05	12	NaN	SWISS-PROT:P04259	Tax_Id=9606 Gene_Symbol=KRT6B Keratin, type II cytoskeletal 6B	NaN	3	-66.9648	0.330352	Nb	Hp	NaN	NaN	NaN
Nb / Control	P01044-1	P01044-1	-1.53732	1.53732	5.40787e-06	9.69403e-05	12	NaN	SWISS-PROT:P01044-1	(Bos taurus) Isoform HMW of Kininogen-1 precursor	NaN	16	-65.5475	0.344525	Nb	Control	NaN	NaN	NaN
Nb / Hp	P54822	P54822	2.07761	2.07761	5.41438e-06	9.69403e-05	12	P54822	Adsl	Adenylosuccinate lyase	PUR8_MOUSE	23	322.107	4.22107	Nb	Hp	NaN	NaN	NaN
Nb / Hp	P82343	P82343	3.63209	3.63209	5.3952e-06	9.69403e-05	12	P82343	Renbp	N-acylglucosamine 2-epimerase	RENBP_MOUSE	4	1139.85	12.3985	Nb	Hp	NaN	NaN	NaN
Nb / Hp	Q9CQZ5	Q9CQZ5	-1.65909	1.65909	5.43863e-06	9.69403e-05	12	Q9CQZ5	Ndufa6	NADH dehydrogenase [ubiquinone] 1 alpha subcomplex subunit 6	NDUA6_MOUSE	9	-68.3362	0.316638	Nb	Hp	NaN	NaN	NaN
Nb / Hp	P97494	P97494	1.40917	1.40917	5.55456e-06	9.85261e-05	12	P97494	Gclc	Glutamate--cysteine ligase catalytic subunit	GSH1_MOUSE	11	165.584	2.65584	Nb	Hp	NaN	NaN	NaN
Nb / Hp	Q9R049	Q9R049	-2.32502	2.32502	5.62995e-06	9.93809e-05	12	Q9R049	Amfr	E3 ubiquitin-protein ligase AMFR	AMFR_MOUSE	7	-80.0428	0.199572	Nb	Hp	NaN	NaN	NaN
Nb / Hp	Q8C0I1	Q8C0I1	-1.13037	1.13037	5.8497e-06	0.000102764	12	Q8C0I1	Agps	Alkyldihydroxyacetonephosphate synthase, peroxisomal	ADAS_MOUSE	31	-54.32	0.4568	Nb	Hp	NaN	NaN	NaN
Nb / Hp	O88685	O88685	0.790494	0.790494	5.9143e-06	0.000103364	12	O88685	Psmc3	26S proteasome regulatory subunit 6A	PRS6A_MOUSE	22	72.9667	1.72967	Nb	Hp	NaN	NaN	NaN
Nb / Hp	Q8BMK4	Q8BMK4	-1.08596	1.08596	5.94048e-06	0.000103364	12	Q8BMK4	Ckap4	Cytoskeleton-associated protein 4	CKAP4_MOUSE	43	-52.8921	0.471079	Nb	Hp	NaN	NaN	NaN
Nb / Hp	P62908	P62908	1.13169	1.13169	6.03843e-06	0.000104078	12	P62908	Rps3	Small ribosomal subunit protein uS3	RS3_MOUSE	30	119.115	2.19115	Nb	Hp	NaN	NaN	NaN
Nb / Hp	Q91WC0	Q91WC0	2.0026	2.0026	6.03378e-06	0.000104078	12	Q91WC0	Setd3	Actin-histidine N-methyltransferase	SETD3_MOUSE	7	300.722	4.00722	Nb	Hp	NaN	NaN	NaN
Nb / Hp	Q9CZW4	Q9CZW4	-1.05198	1.05198	6.07273e-06	0.000104177	12	Q9CZW4	Acsl3	Fatty acid CoA ligase Acsl3	ACSL3_MOUSE	18	-51.7694	0.482306	Nb	Hp	NaN	NaN	NaN
Nb / Hp	Q8C407	Q8C407	-1.57054	1.57054	6.151e-06	0.000105027	12	Q8C407	Yipf4	Protein YIPF4	YIPF4_MOUSE	4	-66.3318	0.336682	Nb	Hp	NaN	NaN	NaN
Nb / Hp	P14148	P14148	1.11903	1.11903	6.23895e-06	0.000106033	12	P14148	Rpl7	Large ribosomal subunit protein uL30	RL7_MOUSE	29	117.2	2.172	Nb	Hp	NaN	NaN	NaN
Nb / Control	Q920E5	Q920E5	2.17642	2.17642	6.35062e-06	0.000107431	12	Q920E5	Fdps	Farnesyl pyrophosphate synthase	FPPS_MOUSE	19	352.031	4.52031	Nb	Control	NaN	NaN	NaN
Nb / Hp	P10922	P10922	-0.97418	0.97418	6.40551e-06	0.000107556	12	P10922	H1-0	Histone H1.0	H10_MOUSE	9	-49.0971	0.509029	Nb	Hp	NaN	NaN	NaN
Nb / Hp	Q921M4	Q921M4	-1.38675	1.38675	6.41683e-06	0.000107556	12	Q921M4	Golga2	Golgin subfamily A member 2	GOGA2_MOUSE	25	-61.7575	0.382425	Nb	Hp	NaN	NaN	NaN
Nb / Hp	P15379	P15379	-1.13062	1.13062	6.48e-06	0.000108118	12	P15379	Cd44	CD44 antigen	CD44_MOUSE	6	-54.3282	0.456718	Nb	Hp	NaN	NaN	NaN
Nb / Hp	P52019	P52019	-0.821337	0.821337	6.72008e-06	0.000108975	12	P52019	Sqle	Squalene monooxygenase	ERG1_MOUSE	18	-43.4083	0.565917	Nb	Hp	NaN	NaN	NaN
Nb / Hp	Q3TBT3	Q3TBT3	-1.42704	1.42704	6.73017e-06	0.000108975	12	Q3TBT3	Sting1	Stimulator of interferon genes protein	STING_MOUSE	10	-62.8108	0.371892	Nb	Hp	NaN	NaN	NaN
Nb / Hp	Q3U9N9	Q3U9N9	-2.87602	2.87602	6.71034e-06	0.000108975	12	Q3U9N9	Slc16a10	Monocarboxylate transporter 10	MOT10_MOUSE	2	-86.3783	0.136217	Nb	Hp	NaN	NaN	NaN
Nb / Hp	Q61712	Q61712	-1.59106	1.59106	6.58204e-06	0.000108975	12	Q61712	Dnajc1	DnaJ homolog subfamily C member 1	DNJC1_MOUSE	4	-66.8071	0.331929	Nb	Hp	NaN	NaN	NaN
Nb / Hp	Q9CQ88	Q9CQ88	-2.52955	2.52955	6.74014e-06	0.000108975	12	Q9CQ88	Tspan31	Tetraspanin-31	TSN31_MOUSE	2	-82.6807	0.173193	Nb	Hp	NaN	NaN	NaN
Nb / Hp	Q9Z0X1	Q9Z0X1	-1.06804	1.06804	6.70197e-06	0.000108975	12	Q9Z0X1	Aifm1	Apoptosis-inducing factor 1, mitochondrial	AIFM1_MOUSE	28	-52.3035	0.476965	Nb	Hp	NaN	NaN	NaN
Hp / Control	Q9Z2X1	Q9Z2X1	1.28648	1.28648	6.69209e-06	0.000108975	12	Q9Z2X1	Hnrnpf	Heterogeneous nuclear ribonucleoprotein F	HNRPF_MOUSE	17	143.932	2.43932	Hp	Control	NaN	NaN	NaN
Nb / Hp	Q99MZ7	Q99MZ7	-0.498564	0.498564	6.78241e-06	0.000109176	12	Q99MZ7	Pecr	Peroxisomal trans-2-enoyl-CoA reductase	PECR_MOUSE	7	-29.2189	0.707811	Nb	Hp	NaN	NaN	NaN
Nb / Hp	O35465	O35465	-1.12562	1.12562	6.97932e-06	0.000110525	12	O35465	Fkbp8	Peptidyl-prolyl cis-trans isomerase FKBP8	FKBP8_MOUSE	14	-54.1695	0.458305	Nb	Hp	NaN	NaN	NaN
Nb / Hp	O35887	O35887	-1.85797	1.85797	7.07796e-06	0.000110525	12	O35887	Calu	Calumenin	CALU_MOUSE	5	-72.4135	0.275865	Nb	Hp	NaN	NaN	NaN
Nb / Hp	O88736	O88736	-1.28055	1.28055	7.07051e-06	0.000110525	12	O88736	Hsd17b7	3-keto-steroid reductase/17-beta-hydroxysteroid dehydrogenase 7	DHB7_MOUSE	7	-58.8363	0.411637	Nb	Hp	NaN	NaN	NaN
Nb / Hp	P60843	P60843	1.8614	1.8614	7.02258e-06	0.000110525	12	P60843	Eif4a1	Eukaryotic initiation factor 4A-I	IF4A1_MOUSE	29	263.361	3.63361	Nb	Hp	NaN	NaN	NaN
Nb / Hp	Q8BPU7	Q8BPU7	0.89237	0.89237	7.04539e-06	0.000110525	12	Q8BPU7	Elmo1	Engulfment and cell motility protein 1	ELMO1_MOUSE	19	85.6222	1.85622	Nb	Hp	NaN	NaN	NaN
Nb / Hp	Q8BVE3	Q8BVE3	0.622748	0.622748	7.05785e-06	0.000110525	12	Q8BVE3	Atp6v1h	V-type proton ATPase subunit H	VATH_MOUSE	15	53.9805	1.53981	Nb	Hp	NaN	NaN	NaN
Nb / Hp	Q91VM5	Q91VM5	-1.88283	1.88283	6.95551e-06	0.000110525	12	Q91VM5	Rbmxl1	RNA binding motif protein, X-linked-like-1	RMXL1_MOUSE	29	-72.8849	0.271151	Nb	Hp	NaN	NaN	NaN
Hp / Control	P54729	P54729	-0.000488606	0.000488606	7.11726e-06	0.000110666	12	P54729	Nub1	NEDD8 ultimate buster 1	NUB1_MOUSE	3	-0.0338619	0.999661	Hp	Control	NaN	NaN	NaN
Nb / Hp	O35598	O35598	-1.19087	1.19087	7.2257e-06	0.000110983	12	O35598	Adam10	Disintegrin and metalloproteinase domain-containing protein 10	ADA10_MOUSE	15	-56.1963	0.438037	Nb	Hp	NaN	NaN	NaN
Nb / Control	Q58D62	Q58D62	-1.5978	1.5978	7.24926e-06	0.000110983	12	NaN	SWISS-PROT:Q58D62	(Bos taurus) Fetuin-B precursor	NaN	16	-66.962	0.33038	Nb	Control	NaN	NaN	NaN
Nb / Hp	Q99JY0	Q99JY0	-0.912827	0.912827	7.25914e-06	0.000110983	12	Q99JY0	Hadhb	Trifunctional enzyme subunit beta, mitochondrial	ECHB_MOUSE	29	-46.8857	0.531143	Nb	Hp	NaN	NaN	NaN
Nb / Hp	Q9CQT2	Q9CQT2	-1.67463	1.67463	7.23132e-06	0.000110983	12	Q9CQT2	Rbm7	RNA-binding protein 7	RBM7_MOUSE	3	-68.6753	0.313247	Nb	Hp	NaN	NaN	NaN
Nb / Hp	Q8VBT6	Q8VBT6	-1.34996	1.34996	7.36053e-06	0.000112064	12	Q8VBT6	Apobr	Apolipoprotein B receptor	APOBR_MOUSE	6	-60.7697	0.392303	Nb	Hp	NaN	NaN	NaN
Nb / Hp	Q99NB9	Q99NB9	-0.50129	0.50129	7.39945e-06	0.000112189	12	Q99NB9	Sf3b1	Splicing factor 3B subunit 1	SF3B1_MOUSE	66	-29.3525	0.706475	Nb	Hp	NaN	NaN	NaN
Nb / Hp	P40124	P40124	1.43957	1.43957	7.46081e-06	0.000112652	12	P40124	Cap1	Adenylyl cyclase-associated protein 1	CAP1_MOUSE	25	171.24	2.7124	Nb	Hp	NaN	NaN	NaN
Nb / Hp	O70503	O70503	-0.78814	0.78814	7.55781e-06	0.000113647	12	O70503	Hsd17b12	Very-long-chain 3-oxoacyl-CoA reductase	DHB12_MOUSE	22	-42.091	0.57909	Nb	Hp	NaN	NaN	NaN
Nb / Hp	P97822	P97822	1.09149	1.09149	7.74101e-06	0.000113751	12	P97822	Anp32e	Acidic leucine-rich nuclear phosphoprotein 32 family member E	AN32E_MOUSE	4	113.094	2.13094	Nb	Hp	NaN	NaN	NaN
Hp / Control	P99027	P99027	1.59154	1.59154	7.73718e-06	0.000113751	12	P99027	Rplp2	Large ribosomal subunit protein P2	RLA2_MOUSE	4	201.37	3.0137	Hp	Control	NaN	NaN	NaN
Nb / Hp	Q8BM72	Q8BM72	-1.79792	1.79792	7.65525e-06	0.000113751	12	Q8BM72	Hspa13	Heat shock 70 kDa protein 13	HSP13_MOUSE	6	-71.241	0.28759	Nb	Hp	NaN	NaN	NaN
Hp / Control	Q8CGA0	Q8CGA0	1.16105	1.16105	7.72135e-06	0.000113751	12	Q8CGA0	Ppm1f	Protein phosphatase 1F	PPM1F_MOUSE	2	123.619	2.23619	Hp	Control	NaN	NaN	NaN
Nb / Hp	Q91YW3	Q91YW3	-0.815488	0.815488	7.75151e-06	0.000113751	12	Q91YW3	Dnajc3	DnaJ homolog subfamily C member 3	DNJC3_MOUSE	24	-43.1784	0.568216	Nb	Hp	NaN	NaN	NaN
Nb / Hp	Q9QYE6	Q9QYE6	-2.01054	2.01054	7.72309e-06	0.000113751	12	Q9QYE6	Golga5	Golgin subfamily A member 5	GOGA5_MOUSE	29	-75.182	0.24818	Nb	Hp	NaN	NaN	NaN
Nb / Hp	Q9JI13	Q9JI13	-2.12993	2.12993	7.80647e-06	0.000114099	12	Q9JI13	Utp3	Something about silencing protein 10	SAS10_MOUSE	7	-77.1531	0.228469	Nb	Hp	NaN	NaN	NaN
Nb / Hp	O35691	O35691	-1.68742	1.68742	7.85643e-06	0.000114269	12	O35691	Pnn	Pinin	PININ_MOUSE	18	-68.9519	0.310481	Nb	Hp	NaN	NaN	NaN
Nb / Hp	Q6PFD9	Q6PFD9	-1.12162	1.12162	7.88966e-06	0.000114269	12	Q6PFD9	Nup98	Nuclear pore complex protein Nup98-Nup96	NUP98_MOUSE	41	-54.0424	0.459576	Nb	Hp	NaN	NaN	NaN
Nb / Hp	Q9JIK5	Q9JIK5	-0.625815	0.625815	7.91186e-06	0.000114269	12	Q9JIK5	Ddx21	Nucleolar RNA helicase 2	DDX21_MOUSE	66	-35.1946	0.648054	Nb	Hp	NaN	NaN	NaN
Nb / Hp	Q8CH25	Q8CH25	-1.38794	1.38794	7.99015e-06	0.000114945	12	Q8CH25	Sltm	SAFB-like transcription modulator	SLTM_MOUSE	12	-61.7891	0.382109	Nb	Hp	NaN	NaN	NaN
Nb / Hp	Q03247	Q03247	-2.16091	2.16091	8.10807e-06	0.000115818	12	NaN	SWISS-PROT:Q03247	(Bos taurus) Apolipoprotein E precursor	NaN	14	-77.6384	0.223616	Nb	Hp	NaN	NaN	NaN
Nb / Hp	Q8K1A5	Q8K1A5	-1.47962	1.47962	8.11426e-06	0.000115818	12	Q8K1A5	Tmem41b	Transmembrane protein 41B	TM41B_MOUSE	4	-64.1416	0.358584	Nb	Hp	NaN	NaN	NaN
Nb / Hp	E9Q137	E9Q137	-1.338	1.338	8.19958e-06	0.000116581	12	E9Q137	Tex264	Testis-expressed protein 264 homolog	TX264_MOUSE	6	-60.4431	0.395569	Nb	Hp	NaN	NaN	NaN
Nb / Hp	Q91VU7	Q91VU7	1.73805	1.73805	8.25557e-06	0.000116922	12	Q91VU7	Pus7	Pseudouridylate synthase 7 homolog	PUS7_MOUSE	16	233.584	3.33584	Nb	Hp	NaN	NaN	NaN
Nb / Control	P34955	P34955	-0.904096	0.904096	8.50022e-06	0.000118768	12	NaN	SWISS-PROT:P34955	(Bos taurus) Alpha-1-antiproteinase precursor	NaN	24	-46.5633	0.534367	Nb	Control	NaN	NaN	NaN
Nb / Hp	Q6PHZ2	Q6PHZ2	-1.35952	1.35952	8.46583e-06	0.000118768	12	Q6PHZ2	Camk2d	Calcium/calmodulin-dependent protein kinase type II subunit delta	KCC2D_MOUSE	4	-61.0287	0.389713	Nb	Hp	NaN	NaN	NaN
Nb / Hp	Q80VJ3	Q80VJ3	1.80615	1.80615	8.51595e-06	0.000118768	12	Q80VJ3	Dnph1	5-hydroxymethyl-dUMP N-hydrolase	DNPH1_MOUSE	2	249.707	3.49707	Nb	Hp	NaN	NaN	NaN
Nb / Hp	Q9DBD5	Q9DBD5	-0.713767	0.713767	8.4374e-06	0.000118768	12	Q9DBD5	Pelp1	Proline-, glutamic acid- and leucine-rich protein 1	PELP1_MOUSE	17	-39.0274	0.609726	Nb	Hp	NaN	NaN	NaN
Nb / Hp	P50427	P50427	-0.9786	0.9786	8.61871e-06	0.000118841	12	P50427	Sts	Steryl-sulfatase	STS_MOUSE	5	-49.2528	0.507472	Nb	Hp	NaN	NaN	NaN
Nb / Hp	Q31125	Q31125	-1.74623	1.74623	8.57014e-06	0.000118841	12	Q31125	Slc39a7	Zinc transporter SLC39A7	S39A7_MOUSE	4	-70.1921	0.298079	Nb	Hp	NaN	NaN	NaN
Nb / Hp	Q9CY16	Q9CY16	-0.89781	0.89781	8.59772e-06	0.000118841	12	Q9CY16	Mrps28	Small ribosomal subunit protein bS1m	RT28_MOUSE	7	-46.3299	0.536701	Nb	Hp	NaN	NaN	NaN
Nb / Hp	P62334	P62334	0.950797	0.950797	8.69839e-06	0.000119488	12	P62334	Psmc6	26S proteasome regulatory subunit 10B	PRS10_MOUSE	23	93.294	1.93294	Nb	Hp	NaN	NaN	NaN
Nb / Hp	Q61263	Q61263	-1.44091	1.44091	8.87068e-06	0.000120547	12	Q61263	Soat1	Sterol O-acyltransferase 1	SOAT1_MOUSE	12	-63.1664	0.368336	Nb	Hp	NaN	NaN	NaN
Nb / Hp	Q8BMS1	Q8BMS1	-0.849302	0.849302	8.87445e-06	0.000120547	12	Q8BMS1	Hadha	Trifunctional enzyme subunit alpha, mitochondrial	ECHA_MOUSE	41	-44.4947	0.555053	Nb	Hp	NaN	NaN	NaN
Nb / Hp	Q9WU78	Q9WU78	1.13299	1.13299	8.84257e-06	0.000120547	12	Q9WU78	Pdcd6ip	Programmed cell death 6-interacting protein	PDC6I_MOUSE	33	119.313	2.19313	Nb	Hp	NaN	NaN	NaN
Nb / Hp	Q8VCL2	Q8VCL2	-1.53227	1.53227	9.04125e-06	0.000122358	12	Q8VCL2	Sco2	Protein SCO2 homolog, mitochondrial	SCO2_MOUSE	8	-65.4268	0.345732	Nb	Hp	NaN	NaN	NaN
Nb / Hp	P11440	P11440	1.21469	1.21469	9.20273e-06	0.000124084	12	P11440	Cdk1	Cyclin-dependent kinase 1	CDK1_MOUSE	14	132.09	2.3209	Nb	Hp	NaN	NaN	NaN
Nb / Hp	Q9WUQ2	Q9WUQ2	-1.254	1.254	9.25197e-06	0.000124289	12	Q9WUQ2	Preb	Guanine nucleotide-exchange factor SEC12	SEC12_MOUSE	14	-58.0716	0.419284	Nb	Hp	NaN	NaN	NaN
Nb / Hp	Q8BG81	Q8BG81	-2.67262	2.67262	9.37367e-06	0.000125463	12	Q8BG81	Poldip3	Polymerase delta-interacting protein 3	PDIP3_MOUSE	18	-84.3158	0.156842	Nb	Hp	NaN	NaN	NaN
Nb / Hp	Q8BWY7	Q8BWY7	-1.26178	1.26178	9.54658e-06	0.000126931	12	Q8BWY7	Slc39a11	Zinc transporter ZIP11	S39AB_MOUSE	5	-58.297	0.41703	Nb	Hp	NaN	NaN	NaN
Nb / Hp	Q9CR67	Q9CR67	-0.987009	0.987009	9.55283e-06	0.000126931	12	Q9CR67	Tmem33	Transmembrane protein 33	TMM33_MOUSE	9	-49.5477	0.504523	Nb	Hp	NaN	NaN	NaN
Nb / Hp	Q8CI71	Q8CI71	1.95043	1.95043	9.66955e-06	0.000128016	12	Q8CI71	Vps50	Syndetin	VPS50_MOUSE	6	286.489	3.86489	Nb	Hp	NaN	NaN	NaN
Nb / Control	Q2UVX4	Q2UVX4	-1.72278	1.72278	9.85558e-06	0.000129297	12	NaN	SWISS-PROT:Q2UVX4	(Bos taurus) Complement C3 precursor	NaN	63	-69.7036	0.302964	Nb	Control	NaN	NaN	NaN
Nb / Hp	Q8CGC6	Q8CGC6	-1.07752	1.07752	9.86587e-06	0.000129297	12	Q8CGC6	Rbm28	RNA-binding protein 28	RBM28_MOUSE	30	-52.6156	0.473844	Nb	Hp	NaN	NaN	NaN
Nb / Hp	Q9Z1N5	Q9Z1N5	1.35837	1.35837	9.87243e-06	0.000129297	12	Q9Z1N5	Ddx39b	Spliceosome RNA helicase Ddx39b	DX39B_MOUSE	27	156.395	2.56395	Nb	Hp	NaN	NaN	NaN
Nb / Hp	Q0VBL3	Q0VBL3	-1.3673	1.3673	9.96448e-06	0.000129574	12	Q0VBL3	Rbm15	RNA-binding protein 15	RBM15_MOUSE	21	-61.2385	0.387615	Nb	Hp	NaN	NaN	NaN
Nb / Hp	Q3U2C5	Q3U2C5	-1.11371	1.11371	9.95014e-06	0.000129574	12	Q3U2C5	Rnf149	E3 ubiquitin-protein ligase RNF149	RN149_MOUSE	7	-53.7894	0.462106	Nb	Hp	NaN	NaN	NaN
Nb / Control	P15864	P15864	-1.51043	1.51043	1.00949e-05	0.000130399	12	P15864	H1-2	Histone H1.2	H12_MOUSE	5	-64.8993	0.351007	Nb	Control	NaN	NaN	NaN
Hp / Control	P70372	P70372	1.6584	1.6584	1.00993e-05	0.000130399	12	P70372	Elavl1	ELAV-like protein 1	ELAV1_MOUSE	18	215.666	3.15666	Hp	Control	NaN	NaN	NaN
Hp / Control	Q9D824	Q9D824	1.62244	1.62244	1.02221e-05	0.00013152	12	Q9D824	Fip1l1	Pre-mRNA 3'-end-processing factor FIP1	FIP1_MOUSE	9	207.895	3.07895	Hp	Control	NaN	NaN	NaN
Nb / Hp	Q8CHY6	Q8CHY6	-1.78655	1.78655	1.03033e-05	0.000132076	12	Q8CHY6	Gatad2a	Transcriptional repressor p66 alpha	P66A_MOUSE	15	-71.0136	0.289864	Nb	Hp	NaN	NaN	NaN
Nb / Hp	Q8K1E0	Q8K1E0	-1.07707	1.07707	1.03738e-05	0.000132076	12	Q8K1E0	Stx5	Syntaxin-5	STX5_MOUSE	6	-52.6008	0.473992	Nb	Hp	NaN	NaN	NaN
Nb / Hp	Q9JJ89	Q9JJ89	-1.54862	1.54862	1.03672e-05	0.000132076	12	Q9JJ89	Ccdc86	Coiled-coil domain-containing protein 86	CCD86_MOUSE	9	-65.8162	0.341838	Nb	Hp	NaN	NaN	NaN
Nb / Hp	P11835	P11835	-0.747355	0.747355	1.04369e-05	0.000132418	12	P11835	Itgb2	Integrin beta-2	ITB2_MOUSE	28	-40.4305	0.595695	Nb	Hp	NaN	NaN	NaN
Nb / Hp	Q62178	Q62178	-0.817283	0.817283	1.05166e-05	0.000132967	12	Q62178	Sema4a	Semaphorin-4A	SEM4A_MOUSE	18	-43.249	0.56751	Nb	Hp	NaN	NaN	NaN
Hp / Control	O55057	O55057	-0.661591	0.661591	1.06434e-05	0.000133796	12	O55057	Pde6d	Retinal rod rhodopsin-sensitive cGMP 3',5'-cyclic phosphodiesterase subunit delta	PDE6D_MOUSE	3	-36.7819	0.632181	Hp	Control	NaN	NaN	NaN
Nb / Hp	P41251	P41251	-1.65025	1.65025	1.07286e-05	0.000133796	12	P41251	Slc11a1	Natural resistance-associated macrophage protein 1	NRAM1_MOUSE	4	-68.1414	0.318586	Nb	Hp	NaN	NaN	NaN
Nb / Hp	Q91YK2	Q91YK2	-1.83134	1.83134	1.0679e-05	0.000133796	12	Q91YK2	Rrp1b	Ribosomal RNA processing protein 1 homolog B	RRP1B_MOUSE	24	-71.8997	0.281003	Nb	Hp	NaN	NaN	NaN
Nb / Hp	Q9CZ83	Q9CZ83	-0.571838	0.571838	1.07005e-05	0.000133796	12	Q9CZ83	Mrpl55	Large ribosomal subunit protein mL55	RM55_MOUSE	5	-32.7241	0.672759	Nb	Hp	NaN	NaN	NaN
Nb / Hp	Q99K48	Q99K48	-0.840213	0.840213	1.07737e-05	0.000133901	12	Q99K48	Nono	Non-POU domain-containing octamer-binding protein	NONO_MOUSE	39	-44.1439	0.558561	Nb	Hp	NaN	NaN	NaN
Nb / Hp	P58742	P58742	-1.05873	1.05873	1.09578e-05	0.000134624	12	P58742	Aaas	Aladin	AAAS_MOUSE	13	-51.9947	0.480053	Nb	Hp	NaN	NaN	NaN
Nb / Hp	Q8CI32	Q8CI32	1.1848	1.1848	1.09792e-05	0.000134624	12	Q8CI32	Bag5	BAG family molecular chaperone regulator 5	BAG5_MOUSE	9	127.332	2.27332	Nb	Hp	NaN	NaN	NaN
Nb / Hp	Q922Q1	Q922Q1	-0.933036	0.933036	1.09438e-05	0.000134624	12	Q922Q1	Mtarc2	Mitochondrial amidoxime reducing component 2	MARC2_MOUSE	15	-47.6245	0.523755	Nb	Hp	NaN	NaN	NaN
Nb / Hp	Q9CZX5	Q9CZX5	-1.48722	1.48722	1.09538e-05	0.000134624	12	Q9CZX5	Pinx1	PIN2/TERF1-interacting telomerase inhibitor 1	PINX1_MOUSE	2	-64.33	0.3567	Nb	Hp	NaN	NaN	NaN
Nb / Hp	Q8R0X7	Q8R0X7	-1.04168	1.04168	1.1347e-05	0.000138669	12	Q8R0X7	Sgpl1	Sphingosine-1-phosphate lyase 1	SGPL1_MOUSE	28	-51.4239	0.485761	Nb	Hp	NaN	NaN	NaN
Nb / Hp	Q9CSN1	Q9CSN1	-1.91234	1.91234	1.14864e-05	0.000139905	12	Q9CSN1	Snw1	SNW domain-containing protein 1	SNW1_MOUSE	26	-73.4339	0.265661	Nb	Hp	NaN	NaN	NaN
Nb / Hp	ENSEMBL:ENSBTAP00000034412	ENSEMBL:ENSBTAP00000034412	-3.24124	3.24124	1.16486e-05	0.000140941	12	NaN	(Bos	taurus) similar to C4b-binding protein alpha chain	NaN	12	-89.4248	0.105752	Nb	Hp	NaN	NaN	NaN
Nb / Hp	Q8VDF2	Q8VDF2	-0.962338	0.962338	1.16171e-05	0.000140941	12	Q8VDF2	Uhrf1	E3 ubiquitin-protein ligase UHRF1	UHRF1_MOUSE	36	-48.6776	0.513224	Nb	Hp	NaN	NaN	NaN
Nb / Hp	O88379	O88379	-0.96845	0.96845	1.18002e-05	0.000141941	12	O88379	Baz1a	Bromodomain adjacent to zinc finger domain protein 1A	BAZ1A_MOUSE	30	-48.8945	0.511055	Nb	Hp	NaN	NaN	NaN
Nb / Hp	Q91XA2	Q91XA2	-1.10468	1.10468	1.1809e-05	0.000141941	12	Q91XA2	Golm1	Golgi membrane protein 1	GOLM1_MOUSE	7	-53.4996	0.465004	Nb	Hp	NaN	NaN	NaN
Nb / Hp	Q8CIG8	Q8CIG8	1.33914	1.33914	1.18504e-05	0.000141972	12	Q8CIG8	Prmt5	Protein arginine N-methyltransferase 5	ANM5_MOUSE	13	153	2.53	Nb	Hp	NaN	NaN	NaN
Nb / Hp	Q9JKN1	Q9JKN1	-0.933093	0.933093	1.20488e-05	0.000143877	12	Q9JKN1	Slc30a7	Zinc transporter 7	ZNT7_MOUSE	5	-47.6266	0.523734	Nb	Hp	NaN	NaN	NaN
Nb / Hp	Q80U93	Q80U93	-0.602861	0.602861	1.24943e-05	0.00014678	12	Q80U93	Nup214	Nuclear pore complex protein Nup214	NU214_MOUSE	40	-34.1553	0.658447	Nb	Hp	NaN	NaN	NaN
Nb / Hp	Q8C5L7	Q8C5L7	-1.59363	1.59363	1.25729e-05	0.00014678	12	Q8C5L7	Rbm34	RNA-binding protein 34	RBM34_MOUSE	14	-66.8663	0.331337	Nb	Hp	NaN	NaN	NaN
Nb / Hp	Q8R1S0	Q8R1S0	-0.455467	0.455467	1.25173e-05	0.00014678	12	Q8R1S0	Coq6	Ubiquinone biosynthesis monooxygenase COQ6, mitochondrial	COQ6_MOUSE	7	-27.0726	0.729274	Nb	Hp	NaN	NaN	NaN
Nb / Hp	Q9D0D3	Q9D0D3	-0.620596	0.620596	1.25689e-05	0.00014678	12	Q9D0D3	Mtpap	Poly(A) RNA polymerase, mitochondrial	PAPD1_MOUSE	10	-34.9598	0.650402	Nb	Hp	NaN	NaN	NaN
Nb / Control	Q9D2C2	Q9D2C2	2.81821	2.81821	1.24855e-05	0.00014678	12	Q9D2C2	Saal1	Protein SAAL1	SAAL1_MOUSE	2	605.286	7.05286	Nb	Control	NaN	NaN	NaN
Nb / Hp	Q9WUR2	Q9WUR2	-0.946721	0.946721	1.25731e-05	0.00014678	12	Q9WUR2	Eci2	Enoyl-CoA delta isomerase 2	ECI2_MOUSE	9	-48.119	0.51881	Nb	Hp	NaN	NaN	NaN
Nb / Hp	Q9WV55	Q9WV55	-2.09984	2.09984	1.23846e-05	0.00014678	12	Q9WV55	Vapa	Vesicle-associated membrane protein-associated protein A	VAPA_MOUSE	15	-76.6716	0.233284	Nb	Hp	NaN	NaN	NaN
Nb / Hp	Q99KE1	Q99KE1	0.631404	0.631404	1.26395e-05	0.000147085	12	Q99KE1	Me2	NAD-dependent malic enzyme, mitochondrial	MAOM_MOUSE	24	54.9072	1.54907	Nb	Hp	NaN	NaN	NaN
Nb / Hp	Q9WV02	Q9WV02	-1.80738	1.80738	1.26834e-05	0.000147127	12	Q9WV02	Rbmx	RNA-binding motif protein, X chromosome	RBMX_MOUSE	3	-71.429	0.28571	Nb	Hp	NaN	NaN	NaN
Nb / Control	Q9CQS8	Q9CQS8	-1.28478	1.28478	1.27496e-05	0.000147427	12	Q9CQS8	Sec61b	Protein transport protein Sec61 subunit beta	SC61B_MOUSE	3	-58.9567	0.410433	Nb	Control	NaN	NaN	NaN
Nb / Hp	O88286	O88286	-2.94486	2.94486	1.29872e-05	0.000149701	12	O88286	Wiz	Protein Wiz	WIZ_MOUSE	7	-87.013	0.12987	Nb	Hp	NaN	NaN	NaN
Nb / Hp	Q3TDN2	Q3TDN2	-1.12056	1.12056	1.31184e-05	0.00015063	12	Q3TDN2	Faf2	FAS-associated factor 2	FAF2_MOUSE	15	-54.0085	0.459915	Nb	Hp	NaN	NaN	NaN
Nb / Hp	Q8R2K1	Q8R2K1	2.89002	2.89002	1.31503e-05	0.00015063	12	Q8R2K1	Fuom	Fucose mutarotase	FUCM_MOUSE	2	641.279	7.41279	Nb	Hp	NaN	NaN	NaN
Nb / Hp	Q149L6	Q149L6	-2.47128	2.47128	1.32243e-05	0.000151005	12	Q149L6	Dnajb14	DnaJ homolog subfamily B member 14	DJB14_MOUSE	7	-81.9669	0.180331	Nb	Hp	NaN	NaN	NaN
Nb / Hp	P30993	P30993	-0.21591	0.21591	1.34107e-05	0.000152182	12	P30993	C5ar1	C5a anaphylatoxin chemotactic receptor 1	C5AR1_MOUSE	4	-13.8997	0.861003	Nb	Hp	NaN	NaN	NaN
Nb / Control	Q8VE37	Q8VE37	-1.92343	1.92343	1.33904e-05	0.000152182	12	Q8VE37	Rcc1	Regulator of chromosome condensation	RCC1_MOUSE	17	-73.6373	0.263627	Nb	Control	NaN	NaN	NaN
Nb / Hp	Q8K2C9	Q8K2C9	-1.05167	1.05167	1.37298e-05	0.000154858	12	Q8K2C9	Hacd3	Very-long-chain (3R)-3-hydroxyacyl-CoA dehydratase 3	HACD3_MOUSE	7	-51.7591	0.482409	Nb	Hp	NaN	NaN	NaN
Nb / Hp	Q8R322	Q8R322	-1.46956	1.46956	1.39008e-05	0.000154858	12	Q8R322	Gle1	mRNA export factor GLE1	GLE1_MOUSE	8	-63.8909	0.361091	Nb	Hp	NaN	NaN	NaN
Nb / Control	Q922Q8	Q922Q8	-1.14257	1.14257	1.38515e-05	0.000154858	12	Q922Q8	Lrrc59	Leucine-rich repeat-containing protein 59	LRC59_MOUSE	19	-54.7049	0.452951	Nb	Control	NaN	NaN	NaN
Nb / Hp	Q9CV28	Q9CV28	1.96557	1.96557	1.38232e-05	0.000154858	12	Q9CV28	Mindy3	Ubiquitin carboxyl-terminal hydrolase MINDY-3	MINY3_MOUSE	2	290.567	3.90567	Nb	Hp	NaN	NaN	NaN
Nb / Hp	Q9DB73	Q9DB73	-1.02493	1.02493	1.38865e-05	0.000154858	12	Q9DB73	Cyb5r1	NADH-cytochrome b5 reductase 1	NB5R1_MOUSE	18	-50.8565	0.491435	Nb	Hp	NaN	NaN	NaN
Nb / Hp	REFSEQ:XP_001252647	REFSEQ:XP_001252647	-2.29956	2.29956	1.37808e-05	0.000154858	12	NaN	(Bos	taurus) similar to endopin 2B	NaN	13	-79.6875	0.203125	Nb	Hp	NaN	NaN	NaN
Nb / Control	Q6AXC6	Q6AXC6	1.1704	1.1704	1.40358e-05	0.000155415	12	Q6AXC6	Ddx11	ATP-dependent DNA helicase DDX11	DDX11_MOUSE	3	125.073	2.25073	Nb	Control	NaN	NaN	NaN
Nb / Hp	Q8BTI8	Q8BTI8	-2.54512	2.54512	1.40173e-05	0.000155415	12	Q8BTI8	Srrm2	Serine/arginine repetitive matrix protein 2	SRRM2_MOUSE	31	-82.8666	0.171334	Nb	Hp	NaN	NaN	NaN
Nb / Hp	Q9CYN2	Q9CYN2	-1.11941	1.11941	1.41212e-05	0.000155418	12	Q9CYN2	Spcs2	Signal peptidase complex subunit 2	SPCS2_MOUSE	20	-53.9718	0.460282	Nb	Hp	NaN	NaN	NaN
Nb / Hp	Q9DBR0	Q9DBR0	-0.927892	0.927892	1.41099e-05	0.000155418	12	Q9DBR0	Akap8	A-kinase anchor protein 8	AKAP8_MOUSE	8	-47.4374	0.525626	Nb	Hp	NaN	NaN	NaN
Nb / Hp	Q920E5	Q920E5	2.11916	2.11916	1.42914e-05	0.000156819	12	Q920E5	Fdps	Farnesyl pyrophosphate synthase	FPPS_MOUSE	19	334.441	4.34441	Nb	Hp	NaN	NaN	NaN
Nb / Hp	Q8VHR5	Q8VHR5	-1.9052	1.9052	1.45219e-05	0.00015847	12	Q8VHR5	Gatad2b	Transcriptional repressor p66-beta	P66B_MOUSE	6	-73.3021	0.266979	Nb	Hp	NaN	NaN	NaN
Nb / Hp	Q921F2	Q921F2	-1.26602	1.26602	1.45285e-05	0.00015847	12	Q921F2	Tardbp	TAR DNA-binding protein 43	TADBP_MOUSE	16	-58.4196	0.415804	Nb	Hp	NaN	NaN	NaN
Nb / Hp	Q8VEG4	Q8VEG4	-1.37616	1.37616	1.48122e-05	0.000161083	12	Q8VEG4	Exd2	Exonuclease 3'-5' domain-containing protein 2	EXD2_MOUSE	5	-61.4758	0.385242	Nb	Hp	NaN	NaN	NaN
Nb / Hp	P24288	P24288	2.70505	2.70505	1.49824e-05	0.000161246	12	P24288	Bcat1	Branched-chain-amino-acid aminotransferase, cytosolic	BCAT1_MOUSE	8	552.081	6.52081	Nb	Hp	NaN	NaN	NaN
Nb / Hp	Q08288	Q08288	-1.20123	1.20123	1.50464e-05	0.000161246	12	Q08288	Lyar	Cell growth-regulating nucleolar protein	LYAR_MOUSE	18	-56.5096	0.434904	Nb	Hp	NaN	NaN	NaN
Nb / Hp	Q60854	Q60854	1.69551	1.69551	1.49106e-05	0.000161246	12	Q60854	Serpinb6	Serpin B6	SPB6_MOUSE	10	223.892	3.23892	Nb	Hp	NaN	NaN	NaN
Nb / Hp	Q80U63	Q80U63	-1.19349	1.19349	1.49582e-05	0.000161246	12	Q80U63	Mfn2	Mitofusin-2	MFN2_MOUSE	11	-56.2757	0.437243	Nb	Hp	NaN	NaN	NaN
Nb / Hp	Q99K23	Q99K23	-0.907929	0.907929	1.50479e-05	0.000161246	12	Q99K23	Ufsp2	Ufm1-specific protease 2	UFSP2_MOUSE	18	-46.705	0.53295	Nb	Hp	NaN	NaN	NaN
Nb / Hp	O70152	O70152	-1.37646	1.37646	1.54556e-05	0.00016513	12	O70152	Dpm1	Dolichol-phosphate mannosyltransferase subunit 1	DPM1_MOUSE	14	-61.4837	0.385163	Nb	Hp	NaN	NaN	NaN
Nb / Hp	Q61335	Q61335	-1.80686	1.80686	1.55648e-05	0.00016513	12	Q61335	Bcap31	B-cell receptor-associated protein 31	BAP31_MOUSE	14	-71.4189	0.285811	Nb	Hp	NaN	NaN	NaN
Nb / Hp	Q920A7	Q920A7	-1.39227	1.39227	1.55612e-05	0.00016513	12	Q920A7	Afg3l1	Mitochondrial inner membrane m-AAA protease component AFG3L1	AFG31_MOUSE	19	-61.9035	0.380965	Nb	Hp	NaN	NaN	NaN
Nb / Control	Q9QXY9	Q9QXY9	-1.62955	1.62955	1.55911e-05	0.00016513	12	Q9QXY9	Pex3	Peroxisomal biogenesis factor 3	PEX3_MOUSE	5	-67.6811	0.323189	Nb	Control	NaN	NaN	NaN
Nb / Control	Q9CR68	Q9CR68	-0.911678	0.911678	1.57963e-05	0.00016682	12	Q9CR68	Uqcrfs1	Cytochrome b-c1 complex subunit Rieske, mitochondrial	UCRI_MOUSE	13	-46.8433	0.531567	Nb	Control	NaN	NaN	NaN
Nb / Hp	Q9Z2I9	Q9Z2I9	-0.532845	0.532845	1.58547e-05	0.000166954	12	Q9Z2I9	Sucla2	Succinate--CoA ligase [ADP-forming] subunit beta, mitochondrial	SUCB1_MOUSE	16	-30.881	0.69119	Nb	Hp	NaN	NaN	NaN
Nb / Control	P43275	P43275	-1.09982	1.09982	1.59083e-05	0.000167037	12	P43275	H1-1	Histone H1.1	H11_MOUSE	11	-53.3424	0.466576	Nb	Control	NaN	NaN	NaN
Nb / Hp	O70145	O70145	1.27504	1.27504	1.60034e-05	0.000167406	12	O70145	Ncf2	Neutrophil cytosol factor 2	NCF2_MOUSE	20	142.005	2.42005	Nb	Hp	NaN	NaN	NaN
Nb / Hp	Q61171	Q61171	1.9594	1.9594	1.6035e-05	0.000167406	12	Q61171	Prdx2	Peroxiredoxin-2	PRDX2_MOUSE	10	288.899	3.88899	Nb	Hp	NaN	NaN	NaN
Nb / Hp	Q8BVI4	Q8BVI4	2.05975	2.05975	1.60967e-05	0.000167571	12	Q8BVI4	Qdpr	Dihydropteridine reductase	DHPR_MOUSE	8	316.914	4.16914	Nb	Hp	NaN	NaN	NaN
Nb / Hp	P50544	P50544	-0.885663	0.885663	1.61698e-05	0.000167853	12	P50544	Acadvl	Very long-chain specific acyl-CoA dehydrogenase, mitochondrial	ACADV_MOUSE	29	-45.8761	0.541239	Nb	Hp	NaN	NaN	NaN
Nb / Hp	Q8VIJ6	Q8VIJ6	-0.750786	0.750786	1.62953e-05	0.0001682	12	Q8VIJ6	Sfpq	Splicing factor, proline- and glutamine-rich	SFPQ_MOUSE	38	-40.572	0.59428	Nb	Hp	NaN	NaN	NaN
Nb / Control	Q921E2	Q921E2	-0.755446	0.755446	1.62919e-05	0.0001682	12	Q921E2	Rab31	Ras-related protein Rab-31	RAB31_MOUSE	9	-40.7637	0.592363	Nb	Control	NaN	NaN	NaN
Nb / Hp	Q9D1M7	Q9D1M7	-1.36735	1.36735	1.63506e-05	0.000168296	12	Q9D1M7	Fkbp11	Peptidyl-prolyl cis-trans isomerase FKBP11	FKB11_MOUSE	9	-61.2398	0.387602	Nb	Hp	NaN	NaN	NaN
Nb / Hp	Q91VR2	Q91VR2	-0.928375	0.928375	1.63992e-05	0.000168322	12	Q91VR2	Atp5f1c	ATP synthase subunit gamma, mitochondrial	ATPG_MOUSE	15	-47.455	0.52545	Nb	Hp	NaN	NaN	NaN
Nb / Hp	P61620	P61620	-1.02795	1.02795	1.68854e-05	0.000170664	12	P61620	Sec61a1	Protein transport protein Sec61 subunit alpha isoform 1	S61A1_MOUSE	7	-50.9595	0.490405	Nb	Hp	NaN	NaN	NaN
Nb / Hp	Q02053	Q02053	1.96681	1.96681	1.67666e-05	0.000170664	12	Q02053	Uba1	Ubiquitin-like modifier-activating enzyme 1	UBA1_MOUSE	42	290.902	3.90902	Nb	Hp	NaN	NaN	NaN
Nb / Hp	Q3V009	Q3V009	-1.15916	1.15916	1.69543e-05	0.000170664	12	Q3V009	Tmed1	Transmembrane emp24 domain-containing protein 1	TMED1_MOUSE	4	-55.2228	0.447772	Nb	Hp	NaN	NaN	NaN
Nb / Hp	Q60668	Q60668	-0.619233	0.619233	1.67e-05	0.000170664	12	Q60668	Hnrnpd	Heterogeneous nuclear ribonucleoprotein D0	HNRPD_MOUSE	18	-34.8983	0.651017	Nb	Hp	NaN	NaN	NaN
Nb / Hp	Q99KC8	Q99KC8	1.25475	1.25475	1.69064e-05	0.000170664	12	Q99KC8	Vwa5a	von Willebrand factor A domain-containing protein 5A	VMA5A_MOUSE	21	138.625	2.38625	Nb	Hp	NaN	NaN	NaN
Hp / Control	Q99KG3	Q99KG3	1.8358	1.8358	1.68253e-05	0.000170664	12	Q99KG3	Rbm10	RNA-binding protein 10	RBM10_MOUSE	15	256.971	3.56971	Hp	Control	NaN	NaN	NaN
Nb / Control	Q9JKX4	Q9JKX4	-1.38768	1.38768	1.69241e-05	0.000170664	12	Q9JKX4	Aatf	Protein AATF	AATF_MOUSE	21	-61.782	0.38218	Nb	Control	NaN	NaN	NaN
Nb / Hp	O88967	O88967	-1.07243	1.07243	1.71447e-05	0.00017102	12	O88967	Yme1l1	ATP-dependent zinc metalloprotease YME1L1	YMEL1_MOUSE	27	-52.4482	0.475518	Nb	Hp	NaN	NaN	NaN
Nb / Control	P43274	P43274	-1.84476	1.84476	1.71769e-05	0.00017102	12	P43274	H1-4	Histone H1.4	H14_MOUSE	6	-72.1598	0.278402	Nb	Control	NaN	NaN	NaN
Nb / Hp	P51881	P51881	-1.10633	1.10633	1.71761e-05	0.00017102	12	P51881	Slc25a5	ADP/ATP translocase 2	ADT2_MOUSE	17	-53.5527	0.464473	Nb	Hp	NaN	NaN	NaN
Nb / Hp	Q9D6K8	Q9D6K8	-1.48746	1.48746	1.706e-05	0.00017102	12	Q9D6K8	Fundc2	FUN14 domain-containing protein 2	FUND2_MOUSE	7	-64.3361	0.356639	Nb	Hp	NaN	NaN	NaN
Hp / Control	Q6NZF1	Q6NZF1	2.38111	2.38111	1.75138e-05	0.000173901	12	Q6NZF1	Zc3h11a	Zinc finger CCCH domain-containing protein 11A	ZC11A_MOUSE	27	420.936	5.20936	Hp	Control	NaN	NaN	NaN
Nb / Hp	Q6P8H8	Q6P8H8	-0.804845	0.804845	1.76877e-05	0.000175151	12	Q6P8H8	Alg8	Dolichyl pyrophosphate Glc1Man9GlcNAc2 alpha-1,3-glucosyltransferase	ALG8_MOUSE	2	-42.7577	0.572423	Nb	Hp	NaN	NaN	NaN
Nb / Control	Q99N84	Q99N84	-1.81598	1.81598	1.80201e-05	0.000177004	12	Q99N84	Mrps18b	Small ribosomal subunit protein mS40	RT18B_MOUSE	8	-71.5989	0.284011	Nb	Control	NaN	NaN	NaN
Nb / Hp	Q9D1G1	Q9D1G1	-0.877911	0.877911	1.79891e-05	0.000177004	12	Q9D1G1	Rab1b	Ras-related protein Rab-1B	RAB1B_MOUSE	8	-45.5845	0.544155	Nb	Hp	NaN	NaN	NaN
Nb / Control	Q9D1M7	Q9D1M7	-1.09813	1.09813	1.79627e-05	0.000177004	12	Q9D1M7	Fkbp11	Peptidyl-prolyl cis-trans isomerase FKBP11	FKB11_MOUSE	9	-53.2878	0.467122	Nb	Control	NaN	NaN	NaN
Nb / Hp	B2RXV4	B2RXV4	-1.31752	1.31752	1.81329e-05	0.000177591	12	B2RXV4	Flvcr1	Choline/ethanolamine transporter FLVCR1	FLVC1_MOUSE	3	-59.8775	0.401225	Nb	Hp	NaN	NaN	NaN
Nb / Hp	P41216	P41216	-1.10371	1.10371	1.81771e-05	0.000177591	12	P41216	Acsl1	Long-chain-fatty-acid--CoA ligase 1	ACSL1_MOUSE	27	-53.4683	0.465317	Nb	Hp	NaN	NaN	NaN
Nb / Hp	Q80XR2	Q80XR2	-1.14708	1.14708	1.82461e-05	0.00017779	12	Q80XR2	Atp2c1	Calcium-transporting ATPase type 2C member 1	AT2C1_MOUSE	13	-54.8461	0.451539	Nb	Hp	NaN	NaN	NaN
Nb / Hp	Q8JZR0	Q8JZR0	-1.00059	1.00059	1.83246e-05	0.000177904	12	Q8JZR0	Acsl5	Long-chain-fatty-acid--CoA ligase 5	ACSL5_MOUSE	25	-50.0206	0.499794	Nb	Hp	NaN	NaN	NaN
Nb / Hp	Q9D2C2	Q9D2C2	3.52059	3.52059	1.84038e-05	0.000177904	12	Q9D2C2	Saal1	Protein SAAL1	SAAL1_MOUSE	2	1047.64	11.4764	Nb	Hp	NaN	NaN	NaN
Nb / Hp	Q9D379	Q9D379	-1.23527	1.23527	1.83768e-05	0.000177904	12	Q9D379	Ephx1	Epoxide hydrolase 1	HYEP_MOUSE	18	-57.5238	0.424762	Nb	Hp	NaN	NaN	NaN
Nb / Hp	Q8BH24	Q8BH24	-1.23404	1.23404	1.85049e-05	0.000178409	12	Q8BH24	Tm9sf4	Transmembrane 9 superfamily member 4	TM9S4_MOUSE	17	-57.4874	0.425126	Nb	Hp	NaN	NaN	NaN
Nb / Hp	P61202	P61202	1.36801	1.36801	1.85991e-05	0.000178811	12	P61202	Cops2	COP9 signalosome complex subunit 2	CSN2_MOUSE	12	158.115	2.58115	Nb	Hp	NaN	NaN	NaN
Nb / Hp	Q8BH47	Q8BH47	-2.66412	2.66412	1.87338e-05	0.000178811	12	Q8BH47	Sec22a	Vesicle-trafficking protein SEC22a	SC22A_MOUSE	2	-84.2232	0.157768	Nb	Hp	NaN	NaN	NaN
Nb / Hp	Q8VBZ3	Q8VBZ3	-1.22383	1.22383	1.87521e-05	0.000178811	12	Q8VBZ3	Clptm1	Putative lipid scramblase CLPTM1	CLPT1_MOUSE	19	-57.1856	0.428144	Nb	Hp	NaN	NaN	NaN
Nb / Hp	Q9CQJ8	Q9CQJ8	-1.13804	1.13804	1.87913e-05	0.000178811	12	Q9CQJ8	Ndufb9	NADH dehydrogenase [ubiquinone] 1 beta subcomplex subunit 9	NDUB9_MOUSE	10	-54.5622	0.454378	Nb	Hp	NaN	NaN	NaN
Nb / Hp	Q9D6Z1	Q9D6Z1	-0.553055	0.553055	1.87258e-05	0.000178811	12	Q9D6Z1	Nop56	Nucleolar protein 56	NOP56_MOUSE	36	-31.8425	0.681575	Nb	Hp	NaN	NaN	NaN
Nb / Hp	Q64FW2	Q64FW2	-0.958976	0.958976	1.88462e-05	0.000178867	12	Q64FW2	Retsat	All-trans-retinol 13,14-reductase	RETST_MOUSE	21	-48.5578	0.514422	Nb	Hp	NaN	NaN	NaN
Nb / Hp	P99026	P99026	2.3355	2.3355	1.89093e-05	0.000179001	12	P99026	Psmb4	Proteasome subunit beta type-4	PSB4_MOUSE	8	404.726	5.04726	Nb	Hp	NaN	NaN	NaN
Nb / Hp	Q8BKE6	Q8BKE6	-1.14565	1.14565	1.90522e-05	0.000179888	12	Q8BKE6	Cyp20a1	Cytochrome P450 20A1	CP20A_MOUSE	19	-54.8012	0.451988	Nb	Hp	NaN	NaN	NaN
Nb / Hp	O70252	O70252	-1.22207	1.22207	1.91214e-05	0.000180076	12	O70252	Hmox2	Heme oxygenase 2	HMOX2_MOUSE	19	-57.1333	0.428667	Nb	Hp	NaN	NaN	NaN
Nb / Hp	E9Q557	E9Q557	-0.775699	0.775699	1.93932e-05	0.000181235	12	E9Q557	Dsp	Desmoplakin	DESP_MOUSE	27	-41.5894	0.584106	Nb	Hp	NaN	NaN	NaN
Nb / Hp	O54833	O54833	1.09299	1.09299	1.93158e-05	0.000181235	12	O54833	Csnk2a2	Casein kinase II subunit alpha'	CSK22_MOUSE	11	113.316	2.13316	Nb	Hp	NaN	NaN	NaN
Nb / Hp	P29452	P29452	1.27243	1.27243	1.93932e-05	0.000181235	12	P29452	Casp1	Caspase-1	CASP1_MOUSE	12	141.568	2.41568	Nb	Hp	NaN	NaN	NaN
Nb / Hp	Q9DCA2	Q9DCA2	-0.924046	0.924046	1.94956e-05	0.000181727	12	Q9DCA2	Mrps11	Small ribosomal subunit protein uS11m	RT11_MOUSE	6	-47.2971	0.527029	Nb	Hp	NaN	NaN	NaN
Nb / Hp	P06151	P06151	2.01206	2.01206	2.05157e-05	0.000188353	12	P06151	Ldha	L-lactate dehydrogenase A chain	LDHA_MOUSE	26	303.358	4.03358	Nb	Hp	NaN	NaN	NaN
Nb / Hp	P20152	P20152	-0.472611	0.472611	2.03661e-05	0.000188353	12	P20152	Vim	Vimentin	VIME_MOUSE	72	-27.9341	0.720659	Nb	Hp	NaN	NaN	NaN
Nb / Control	Q7TPR4	Q7TPR4	1.83983	1.83983	2.04062e-05	0.000188353	12	Q7TPR4	Actn1	Alpha-actinin-1	ACTN1_MOUSE	52	257.969	3.57969	Nb	Control	NaN	NaN	NaN
Nb / Hp	Q8BMG8	Q8BMG8	-0.921481	0.921481	2.0486e-05	0.000188353	12	Q8BMG8	Slc25a32	Solute carrier family 25 member 32	S2532_MOUSE	7	-47.2033	0.527967	Nb	Hp	NaN	NaN	NaN
Nb / Hp	Q91V01	Q91V01	-1.33473	1.33473	2.04927e-05	0.000188353	12	Q91V01	Lpcat3	Lysophospholipid acyltransferase 5	MBOA5_MOUSE	6	-60.3533	0.396467	Nb	Hp	NaN	NaN	NaN
Nb / Control	Q9QUK3	Q9QUK3	-1.70728	1.70728	2.05118e-05	0.000188353	12	Q9QUK3	Cln8	Protein CLN8	CLN8_MOUSE	2	-69.3764	0.306236	Nb	Control	NaN	NaN	NaN
Nb / Hp	Q9WV70	Q9WV70	-1.09019	1.09019	2.0627e-05	0.0001889	12	Q9WV70	Noc2l	Nucleolar complex protein 2 homolog	NOC2L_MOUSE	19	-53.03	0.4697	Nb	Hp	NaN	NaN	NaN
Nb / Hp	Q61753	Q61753	1.04505	1.04505	2.11837e-05	0.000193513	12	Q61753	Phgdh	D-3-phosphoglycerate dehydrogenase	SERA_MOUSE	26	106.343	2.06343	Nb	Hp	NaN	NaN	NaN
Nb / Hp	P83917	P83917	-1.88387	1.88387	2.13307e-05	0.000193886	12	P83917	Cbx1	Chromobox protein homolog 1	CBX1_MOUSE	3	-72.9044	0.270956	Nb	Hp	NaN	NaN	NaN
Nb / Hp	Q9QYA2	Q9QYA2	-0.754766	0.754766	2.13091e-05	0.000193886	12	Q9QYA2	Tomm40	Mitochondrial import receptor subunit TOM40 homolog	TOM40_MOUSE	13	-40.7358	0.592642	Nb	Hp	NaN	NaN	NaN
Nb / Hp	O35841	O35841	1.37317	1.37317	2.16924e-05	0.000196628	12	O35841	Api5	Apoptosis inhibitor 5	API5_MOUSE	20	159.04	2.5904	Nb	Hp	NaN	NaN	NaN
Nb / Hp	Q99K85	Q99K85	2.69725	2.69725	2.174e-05	0.000196628	12	Q99K85	Psat1	Phosphoserine aminotransferase	SERC_MOUSE	22	548.565	6.48565	Nb	Hp	NaN	NaN	NaN
Nb / Hp	P14106	P14106	-1.25157	1.25157	2.20455e-05	0.000198899	12	P14106	C1qb	Complement C1q subcomponent subunit B	C1QB_MOUSE	3	-58.0008	0.419992	Nb	Hp	NaN	NaN	NaN
Nb / Hp	Q6P1F6	Q6P1F6	1.85343	1.85343	2.22419e-05	0.000199685	12	Q6P1F6	Ppp2r2a	Serine/threonine-protein phosphatase 2A 55 kDa regulatory subunit B alpha isoform	2ABA_MOUSE	12	261.359	3.61359	Nb	Hp	NaN	NaN	NaN
Nb / Hp	Q99LS3	Q99LS3	2.11661	2.11661	2.21939e-05	0.000199685	12	Q99LS3	Psph	Phosphoserine phosphatase	SERB_MOUSE	9	333.675	4.33675	Nb	Hp	NaN	NaN	NaN
Nb / Hp	P62196	P62196	1.09176	1.09176	2.23502e-05	0.000200166	12	P62196	Psmc5	26S proteasome regulatory subunit 8	PRS8_MOUSE	24	113.133	2.13133	Nb	Hp	NaN	NaN	NaN
Nb / Hp	Q8BWG8	Q8BWG8	1.44086	1.44086	2.25511e-05	0.000201472	12	Q8BWG8	Arrb1	Beta-arrestin-1	ARRB1_MOUSE	6	171.483	2.71483	Nb	Hp	NaN	NaN	NaN
Nb / Hp	Q8BM55	Q8BM55	-1.03169	1.03169	2.26668e-05	0.000202011	12	Q8BM55	Tmem214	Transmembrane protein 214	TM214_MOUSE	29	-51.0863	0.489137	Nb	Hp	NaN	NaN	NaN
Nb / Hp	Q9CX56	Q9CX56	1.23372	1.23372	2.27518e-05	0.000202275	12	Q9CX56	Psmd8	26S proteasome non-ATPase regulatory subunit 8	PSMD8_MOUSE	9	135.173	2.35173	Nb	Hp	NaN	NaN	NaN
Nb / Hp	Q8VCB1	Q8VCB1	-1.075	1.075	2.28583e-05	0.000202729	12	Q8VCB1	Ndc1	Nucleoporin NDC1	NDC1_MOUSE	19	-52.5329	0.474671	Nb	Hp	NaN	NaN	NaN
Nb / Hp	Q8BZQ7	Q8BZQ7	1.70891	1.70891	2.31968e-05	0.000205232	12	Q8BZQ7	Anapc2	Anaphase-promoting complex subunit 2	ANC2_MOUSE	9	226.913	3.26913	Nb	Hp	NaN	NaN	NaN
Nb / Hp	P18155	P18155	-0.870296	0.870296	2.34965e-05	0.000207251	12	P18155	Mthfd2	Bifunctional methylenetetrahydrofolate dehydrogenase/cyclohydrolase, mitochondrial	MTDC_MOUSE	14	-45.2966	0.547034	Nb	Hp	NaN	NaN	NaN
Nb / Hp	Q8VHE0	Q8VHE0	-1.04225	1.04225	2.35384e-05	0.000207251	12	Q8VHE0	Sec63	Translocation protein SEC63 homolog	SEC63_MOUSE	30	-51.4431	0.485569	Nb	Hp	NaN	NaN	NaN
Nb / Hp	Q3TFK5	Q3TFK5	-1.82214	1.82214	2.36077e-05	0.000207362	12	Q3TFK5	Gpatch4	G patch domain-containing protein 4	GPTC4_MOUSE	6	-71.7199	0.282801	Nb	Hp	NaN	NaN	NaN
Nb / Hp	Q6A068	Q6A068	-1.81434	1.81434	2.38528e-05	0.000208135	12	Q6A068	Cdc5l	Cell division cycle 5-like protein	CDC5L_MOUSE	32	-71.5665	0.284335	Nb	Hp	NaN	NaN	NaN
Nb / Hp	Q8BY87	Q8BY87	1.81724	1.81724	2.38666e-05	0.000208135	12	Q8BY87	Usp47	Ubiquitin carboxyl-terminal hydrolase 47	UBP47_MOUSE	9	252.406	3.52406	Nb	Hp	NaN	NaN	NaN
Nb / Hp	Q9CQE1	Q9CQE1	0.767975	0.767975	2.38343e-05	0.000208135	12	Q9CQE1	Nipsnap3b	Protein NipSnap homolog 3B	NPS3B_MOUSE	2	70.2878	1.70288	Nb	Hp	NaN	NaN	NaN
Nb / Control	Q61598	Q61598	1.8817	1.8817	2.43264e-05	0.000211137	12	Q61598	Gdi2	Rab GDP dissociation inhibitor beta	GDIB_MOUSE	40	268.51	3.6851	Nb	Control	NaN	NaN	NaN
Nb / Control	Q91WD0	Q91WD0	-0.499366	0.499366	2.43231e-05	0.000211137	12	Q91WD0	Gpr108	Protein GPR108	GP108_MOUSE	2	-29.2582	0.707418	Nb	Control	NaN	NaN	NaN
Nb / Hp	Q9JIS8	Q9JIS8	-0.880014	0.880014	2.44995e-05	0.000212135	12	Q9JIS8	Slc12a4	Solute carrier family 12 member 4	S12A4_MOUSE	5	-45.6638	0.543362	Nb	Hp	NaN	NaN	NaN
Nb / Hp	Q99JR1	Q99JR1	-0.899824	0.899824	2.46451e-05	0.000212892	12	Q99JR1	Sfxn1	Sideroflexin-1	SFXN1_MOUSE	15	-46.4048	0.535952	Nb	Hp	NaN	NaN	NaN
Hp / Control	A2I7N0	A2I7N0	2.82377	2.82377	2.54776e-05	0.000214897	12	NaN	TREMBL:A2I7N0;Q28922;Q3ZEJ6	(Bos taurus) SERPINA3-4	NaN	13	608.011	7.08011	Hp	Control	NaN	NaN	NaN
Nb / Hp	P18572	P18572	-0.615294	0.615294	2.51439e-05	0.000214897	12	P18572	Bsg	Basigin	BASI_MOUSE	11	-34.7203	0.652797	Nb	Hp	NaN	NaN	NaN
Nb / Control	P62908	P62908	1.41228	1.41228	2.56417e-05	0.000214897	12	P62908	Rps3	Small ribosomal subunit protein uS3	RS3_MOUSE	30	166.157	2.66157	Nb	Control	NaN	NaN	NaN
Nb / Hp	P70372	P70372	-0.969385	0.969385	2.55188e-05	0.000214897	12	P70372	Elavl1	ELAV-like protein 1	ELAV1_MOUSE	18	-48.9276	0.510724	Nb	Hp	NaN	NaN	NaN
Nb / Hp	P80315	P80315	1.28477	1.28477	2.54584e-05	0.000214897	12	P80315	Cct4	T-complex protein 1 subunit delta	TCPD_MOUSE	38	143.644	2.43644	Nb	Hp	NaN	NaN	NaN
Nb / Hp	P97363	P97363	-1.16938	1.16938	2.56088e-05	0.000214897	12	P97363	Sptlc2	Serine palmitoyltransferase 2	SPTC2_MOUSE	20	-55.5386	0.444614	Nb	Hp	NaN	NaN	NaN
Nb / Hp	Q91VE6	Q91VE6	-1.34581	1.34581	2.5547e-05	0.000214897	12	Q91VE6	Nifk	MKI67 FHA domain-interacting nucleolar phosphoprotein	MK67I_MOUSE	20	-60.6566	0.393434	Nb	Hp	NaN	NaN	NaN
Nb / Hp	Q91YE6	Q91YE6	1.5605	1.5605	2.53088e-05	0.000214897	12	Q91YE6	Ipo9	Importin-9	IPO9_MOUSE	20	194.957	2.94957	Nb	Hp	NaN	NaN	NaN
Nb / Hp	Q99KF1	Q99KF1	-1.09969	1.09969	2.5082e-05	0.000214897	12	Q99KF1	Tmed9	Transmembrane emp24 domain-containing protein 9	TMED9_MOUSE	13	-53.3382	0.466618	Nb	Hp	NaN	NaN	NaN
Nb / Hp	Q99L47	Q99L47	0.668131	0.668131	2.56397e-05	0.000214897	12	Q99L47	St13	Hsc70-interacting protein	F10A1_MOUSE	15	58.9013	1.58901	Nb	Hp	NaN	NaN	NaN
Nb / Hp	Q9CY64	Q9CY64	1.93732	1.93732	2.53932e-05	0.000214897	12	Q9CY64	Blvra	Biliverdin reductase A	BIEA_MOUSE	17	282.995	3.82995	Nb	Hp	NaN	NaN	NaN
Hp / Control	Q9D1J1	Q9D1J1	0.322528	0.322528	2.56044e-05	0.000214897	12	Q9D1J1	Necap2	Adaptin ear-binding coat-associated protein 2	NECP2_MOUSE	2	25.052	1.25052	Hp	Control	NaN	NaN	NaN
Nb / Control	Q9DBC7	Q9DBC7	1.44783	1.44783	2.54539e-05	0.000214897	12	Q9DBC7	Prkar1a	cAMP-dependent protein kinase type I-alpha regulatory subunit	KAP0_MOUSE	9	172.797	2.72797	Nb	Control	NaN	NaN	NaN
Nb / Hp	B2RXS4	B2RXS4	-0.511057	0.511057	2.57168e-05	0.000215033	12	B2RXS4	Plxnb2	Plexin-B2	PLXB2_MOUSE	37	-29.8292	0.701708	Nb	Hp	NaN	NaN	NaN
Nb / Hp	P47963	P47963	0.881293	0.881293	2.57765e-05	0.000215039	12	P47963	Rpl13	Large ribosomal subunit protein eL13	RL13_MOUSE	17	84.2025	1.84203	Nb	Hp	NaN	NaN	NaN
Nb / Hp	P16675	P16675	1.02164	1.02164	2.60799e-05	0.000217075	12	P16675	Ctsa	Lysosomal protective protein	PPGB_MOUSE	17	103.022	2.03022	Nb	Hp	NaN	NaN	NaN
Nb / Control	Q9JHF7	Q9JHF7	1.52774	1.52774	2.61925e-05	0.000217517	12	Q9JHF7	Hpgds	Hematopoietic prostaglandin D synthase	HPGDS_MOUSE	4	188.335	2.88335	Nb	Control	NaN	NaN	NaN
Nb / Hp	Q6IQX8	Q6IQX8	-3.68795	3.68795	2.63087e-05	0.000217987	12	Q6IQX8	Znf219	Zinc finger protein 219	ZN219_MOUSE	2	-92.2408	0.077592	Nb	Hp	NaN	NaN	NaN
Nb / Control	P43276	P43276	-1.5814	1.5814	2.63849e-05	0.000218123	12	P43276	H1-5	Histone H1.5	H15_MOUSE	14	-66.5841	0.334159	Nb	Control	NaN	NaN	NaN
Nb / Control	O88856	O88856	-1.40807	1.40807	2.68265e-05	0.000221111	12	O88856	Tpst2	Protein-tyrosine sulfotransferase 2	TPST2_MOUSE	5	-62.3186	0.376814	Nb	Control	NaN	NaN	NaN
Nb / Hp	Q8C7V3	Q8C7V3	-1.26989	1.26989	2.68674e-05	0.000221111	12	Q8C7V3	Utp15	U3 small nucleolar RNA-associated protein 15 homolog	UTP15_MOUSE	18	-58.5308	0.414692	Nb	Hp	NaN	NaN	NaN
Nb / Hp	Q8C2Q3	Q8C2Q3	-1.5694	1.5694	2.69597e-05	0.000221372	12	Q8C2Q3	Rbm14	RNA-binding protein 14	RBM14_MOUSE	25	-66.3052	0.336948	Nb	Hp	NaN	NaN	NaN
Nb / Hp	Q9DB96	Q9DB96	-1.40065	1.40065	2.70227e-05	0.000221392	12	Q9DB96	Ngdn	Neuroguidin	NGDN_MOUSE	7	-62.124	0.37876	Nb	Hp	NaN	NaN	NaN
Nb / Control	P00978	P00978	-1.9124	1.9124	2.72735e-05	0.000222947	12	NaN	SWISS-PROT:P00978	(Bos taurus) AMBP protein precursor	NaN	7	-73.435	0.26565	Nb	Control	NaN	NaN	NaN
Nb / Hp	Q8VEM8	Q8VEM8	-1.02086	1.02086	2.73505e-05	0.000223077	12	Q8VEM8	Slc25a3	Solute carrier family 25 member 3	S25A3_MOUSE	22	-50.7176	0.492824	Nb	Hp	NaN	NaN	NaN
Nb / Hp	Q8R1F1	Q8R1F1	1.75634	1.75634	2.75341e-05	0.000224075	12	Q8R1F1	Niban2	Protein Niban 2	NIBA2_MOUSE	24	237.841	3.37841	Nb	Hp	NaN	NaN	NaN
Nb / Hp	Q8VDM4	Q8VDM4	1.50517	1.50517	2.76086e-05	0.000224182	12	Q8VDM4	Psmd2	26S proteasome non-ATPase regulatory subunit 2	PSMD2_MOUSE	33	183.858	2.83858	Nb	Hp	NaN	NaN	NaN
Nb / Hp	Q69ZN7	Q69ZN7	-0.675752	0.675752	2.77514e-05	0.000224842	12	Q69ZN7	Myof	Myoferlin	MYOF_MOUSE	104	-37.3994	0.626006	Nb	Hp	NaN	NaN	NaN
Nb / Control	Q61335	Q61335	-1.07564	1.07564	2.78807e-05	0.00022539	12	Q61335	Bcap31	B-cell receptor-associated protein 31	BAP31_MOUSE	14	-52.5539	0.474461	Nb	Control	NaN	NaN	NaN
Nb / Hp	Q9DBL7	Q9DBL7	1.27327	1.27327	2.81079e-05	0.000226725	12	Q9DBL7	Coasy	Bifunctional coenzyme A synthase	COASY_MOUSE	11	141.708	2.41708	Nb	Hp	NaN	NaN	NaN
Nb / Hp	Q99KG3	Q99KG3	-1.48636	1.48636	2.81704e-05	0.000226728	12	Q99KG3	Rbm10	RNA-binding protein 10	RBM10_MOUSE	15	-64.3088	0.356912	Nb	Hp	NaN	NaN	NaN
Nb / Hp	Q8VCH8	Q8VCH8	-1.22768	1.22768	2.8504e-05	0.000228909	12	Q8VCH8	Ubxn4	UBX domain-containing protein 4	UBXN4_MOUSE	10	-57.2997	0.427003	Nb	Hp	NaN	NaN	NaN
Nb / Control	Q3V209	Q3V209	-1.6075	1.6075	2.88441e-05	0.000231133	12	Q3V209	Tmub2	Transmembrane and ubiquitin-like domain-containing protein 2	TMUB2_MOUSE	3	-67.1834	0.328166	Nb	Control	NaN	NaN	NaN
Nb / Hp	Q91VN4	Q91VN4	-0.790708	0.790708	2.89988e-05	0.000231864	12	Q91VN4	Chchd6	MICOS complex subunit Mic25	MIC25_MOUSE	9	-42.194	0.57806	Nb	Hp	NaN	NaN	NaN
Nb / Hp	Q8C172	Q8C172	-0.895489	0.895489	2.92521e-05	0.000232364	12	Q8C172	Cers6	Ceramide synthase 6	CERS6_MOUSE	7	-46.2435	0.537565	Nb	Hp	NaN	NaN	NaN
Nb / Hp	Q91YQ5	Q91YQ5	-0.963512	0.963512	2.91275e-05	0.000232364	12	Q91YQ5	Rpn1	Dolichyl-diphosphooligosaccharide--protein glycosyltransferase subunit 1	RPN1_MOUSE	55	-48.7193	0.512807	Nb	Hp	NaN	NaN	NaN
Nb / Hp	Q9QUK3	Q9QUK3	-1.73353	1.73353	2.92327e-05	0.000232364	12	Q9QUK3	Cln8	Protein CLN8	CLN8_MOUSE	2	-69.9284	0.300716	Nb	Hp	NaN	NaN	NaN
Nb / Control	P62270	P62270	1.24473	1.24473	2.96519e-05	0.000235029	12	P62270	Rps18	Small ribosomal subunit protein uS13	RS18_MOUSE	17	136.974	2.36974	Nb	Control	NaN	NaN	NaN
Nb / Hp	P04264	P04264	-1.4285	1.4285	2.98709e-05	0.000236252	12	NaN	SWISS-PROT:P04264	Tax_Id=9606 Gene_Symbol=KRT1 Keratin, type II cytoskeletal 1	NaN	54	-62.8484	0.371516	Nb	Hp	NaN	NaN	NaN
Nb / Control	A2RSX7	A2RSX7	2.90143	2.90143	3.03008e-05	0.00023762	12	A2RSX7	Tyw5	tRNA wybutosine-synthesizing protein 5	TYW5_MOUSE	2	647.167	7.47167	Nb	Control	NaN	NaN	NaN
Nb / Control	P07742	P07742	2.24909	2.24909	3.03734e-05	0.00023762	12	P07742	Rrm1	Ribonucleoside-diphosphate reductase large subunit	RIR1_MOUSE	31	375.382	4.75382	Nb	Control	NaN	NaN	NaN
Nb / Hp	P14869	P14869	0.982065	0.982065	3.04341e-05	0.00023762	12	P14869	Rplp0	Large ribosomal subunit protein uL10	RLA0_MOUSE	17	97.529	1.97529	Nb	Hp	NaN	NaN	NaN
Nb / Hp	P53569	P53569	-1.02992	1.02992	3.03041e-05	0.00023762	12	P53569	Cebpz	CCAAT/enhancer-binding protein zeta	CEBPZ_MOUSE	34	-51.0262	0.489738	Nb	Hp	NaN	NaN	NaN
Nb / Control	Q08288	Q08288	-1.27199	1.27199	3.01457e-05	0.00023762	12	Q08288	Lyar	Cell growth-regulating nucleolar protein	LYAR_MOUSE	18	-58.5912	0.414088	Nb	Control	NaN	NaN	NaN
Nb / Hp	Q8BKS9	Q8BKS9	-0.607013	0.607013	3.02262e-05	0.00023762	12	Q8BKS9	Pum3	Pumilio homolog 3	PUM3_MOUSE	28	-34.3445	0.656555	Nb	Hp	NaN	NaN	NaN
Nb / Hp	Q3UGR5	Q3UGR5	1.72864	1.72864	3.05855e-05	0.000238293	12	Q3UGR5	Hdhd2	Haloacid dehalogenase-like hydrolase domain-containing protein 2	HDHD2_MOUSE	2	231.414	3.31414	Nb	Hp	NaN	NaN	NaN
Nb / Control	Q9QUI0	Q9QUI0	0.943141	0.943141	3.06585e-05	0.000238354	12	Q9QUI0	Rhoa	Transforming protein RhoA	RHOA_MOUSE	14	92.271	1.92271	Nb	Control	NaN	NaN	NaN
Nb / Hp	Q6NZC7	Q6NZC7	1.15203	1.15203	3.07802e-05	0.000238792	12	Q6NZC7	Sec23ip	SEC23-interacting protein	S23IP_MOUSE	11	122.226	2.22226	Nb	Hp	NaN	NaN	NaN
Nb / Hp	P04441	P04441	-1.81336	1.81336	3.10625e-05	0.000240471	12	P04441	Cd74	H-2 class II histocompatibility antigen gamma chain	HG2A_MOUSE	4	-71.5472	0.284528	Nb	Hp	NaN	NaN	NaN
Nb / Hp	Q6P1B1	Q6P1B1	1.94829	1.94829	3.13296e-05	0.000241515	12	Q6P1B1	Xpnpep1	Xaa-Pro aminopeptidase 1	XPP1_MOUSE	16	285.917	3.85917	Nb	Hp	NaN	NaN	NaN
Nb / Hp	Q9DBJ1	Q9DBJ1	1.86083	1.86083	3.12645e-05	0.000241515	12	Q9DBJ1	Pgam1	Phosphoglycerate mutase 1	PGAM1_MOUSE	18	263.216	3.63216	Nb	Hp	NaN	NaN	NaN
Nb / Hp	Q8BH59	Q8BH59	-0.976412	0.976412	3.14289e-05	0.000241771	12	Q8BH59	Slc25a12	Electrogenic aspartate/glutamate antiporter SLC25A12, mitochondrial	S2512_MOUSE	24	-49.1758	0.508242	Nb	Hp	NaN	NaN	NaN
Nb / Hp	P34955	P34955	-2.1342	2.1342	3.16605e-05	0.000243041	12	NaN	SWISS-PROT:P34955	(Bos taurus) Alpha-1-antiproteinase precursor	NaN	24	-77.2206	0.227794	Nb	Hp	NaN	NaN	NaN
Nb / Hp	Q6PD26	Q6PD26	-0.917915	0.917915	3.18085e-05	0.000243665	12	Q6PD26	Pigs	GPI transamidase component PIG-S	PIGS_MOUSE	18	-47.0727	0.529273	Nb	Hp	NaN	NaN	NaN
Nb / Hp	Q6P2K6	Q6P2K6	1.81148	1.81148	3.1992e-05	0.000244558	12	Q6P2K6	Ppp4r3a	Serine/threonine-protein phosphatase 4 regulatory subunit 3A	P4R3A_MOUSE	11	251.002	3.51002	Nb	Hp	NaN	NaN	NaN
Nb / Hp	P52480	P52480	1.93542	1.93542	3.21606e-05	0.000245067	12	P52480	Pkm	Pyruvate kinase PKM	KPYM_MOUSE	53	282.488	3.82488	Nb	Hp	NaN	NaN	NaN
Nb / Control	P54822	P54822	1.66463	1.66463	3.22598e-05	0.000245067	12	P54822	Adsl	Adenylosuccinate lyase	PUR8_MOUSE	23	217.033	3.17033	Nb	Control	NaN	NaN	NaN
Nb / Hp	Q9D162	Q9D162	-1.42064	1.42064	3.22365e-05	0.000245067	12	Q9D162	Ccdc167	Coiled-coil domain-containing protein 167	CC167_MOUSE	2	-62.6453	0.373547	Nb	Hp	NaN	NaN	NaN
Nb / Hp	Q61462	Q61462	-1.30954	1.30954	3.24464e-05	0.000245464	12	Q61462	Cyba	Cytochrome b-245 light chain	CY24A_MOUSE	5	-59.6551	0.403449	Nb	Hp	NaN	NaN	NaN
Nb / Hp	Q9CPQ8	Q9CPQ8	-0.686392	0.686392	3.24118e-05	0.000245464	12	Q9CPQ8	Atp5mg	ATP synthase subunit g, mitochondrial	ATP5L_MOUSE	7	-37.8594	0.621406	Nb	Hp	NaN	NaN	NaN
Nb / Hp	Q3UJU9	Q3UJU9	-1.63804	1.63804	3.27522e-05	0.000246768	12	Q3UJU9	Rmdn3	Regulator of microtubule dynamics protein 3	RMD3_MOUSE	12	-67.8708	0.321292	Nb	Hp	NaN	NaN	NaN
Nb / Control	Q61739	Q61739	-0.746691	0.746691	3.27539e-05	0.000246768	12	Q61739	Itga6	Integrin alpha-6	ITA6_MOUSE	6	-40.4031	0.595969	Nb	Control	NaN	NaN	NaN
Nb / Hp	P13645	P13645	-1.78166	1.78166	3.29195e-05	0.000246998	12	NaN	SWISS-PROT:P13645	Tax_Id=9606 Gene_Symbol=KRT10 Keratin, type I cytoskeletal 10	NaN	36	-70.9152	0.290848	Nb	Hp	NaN	NaN	NaN
Hp / Control	Q9D4H1	Q9D4H1	-1.52454	1.52454	3.29118e-05	0.000246998	12	Q9D4H1	Exoc2	Exocyst complex component 2	EXOC2_MOUSE	3	-65.2411	0.347589	Hp	Control	NaN	NaN	NaN
Nb / Hp	P14901	P14901	-1.07506	1.07506	3.385e-05	0.000252424	12	P14901	Hmox1	Heme oxygenase 1	HMOX1_MOUSE	8	-52.5349	0.474651	Nb	Hp	NaN	NaN	NaN
Nb / Control	P17095	P17095	-1.44868	1.44868	3.38386e-05	0.000252424	12	P17095	Hmga1	High mobility group protein HMG-I/HMG-Y	HMGA1_MOUSE	5	-63.3644	0.366356	Nb	Control	NaN	NaN	NaN
Nb / Hp	Q9DBT5	Q9DBT5	1.20665	1.20665	3.3734e-05	0.000252424	12	Q9DBT5	Ampd2	AMP deaminase 2	AMPD2_MOUSE	27	130.801	2.30801	Nb	Hp	NaN	NaN	NaN
Nb / Hp	Q61102	Q61102	-1.01959	1.01959	3.40881e-05	0.000253167	12	Q61102	Abcb7	Iron-sulfur clusters transporter ABCB7, mitochondrial	ABCB7_MOUSE	17	-50.6745	0.493255	Nb	Hp	NaN	NaN	NaN
Nb / Hp	Q9DB77	Q9DB77	-1.4096	1.4096	3.40224e-05	0.000253167	12	Q9DB77	Uqcrc2	Cytochrome b-c1 complex subunit 2, mitochondrial	QCR2_MOUSE	23	-62.3583	0.376417	Nb	Hp	NaN	NaN	NaN
Nb / Control	Q9D8M4	Q9D8M4	-0.855292	0.855292	3.44459e-05	0.000255305	12	Q9D8M4	Rpl7l1	Large ribosomal subunit protein uL30-like 1	RL7L_MOUSE	15	-44.7247	0.552753	Nb	Control	NaN	NaN	NaN
Nb / Hp	Q8R035	Q8R035	-1.37345	1.37345	3.455e-05	0.000255558	12	Q8R035	Mrpl58	Large ribosomal subunit protein mL62	ICT1_MOUSE	8	-61.4033	0.385967	Nb	Hp	NaN	NaN	NaN
Nb / Hp	Q61941	Q61941	-1.07755	1.07755	3.4858e-05	0.000257316	12	Q61941	Nnt	NAD(P) transhydrogenase, mitochondrial	NNTM_MOUSE	34	-52.6167	0.473833	Nb	Hp	NaN	NaN	NaN
Nb / Hp	Q8K385	Q8K385	-0.894586	0.894586	3.50609e-05	0.000258291	12	Q8K385	FRRS1	Ferric-chelate reductase 1	FRRS1_MOUSE	7	-46.2098	0.537902	Nb	Hp	NaN	NaN	NaN
Nb / Hp	Q925I1	Q925I1	-1.05953	1.05953	3.60191e-05	0.000264285	12	Q925I1	Atad3	ATPase family AAA domain-containing protein 3	ATAD3_MOUSE	31	-52.0213	0.479787	Nb	Hp	NaN	NaN	NaN
Nb / Hp	Q99J47	Q99J47	-1.03117	1.03117	3.60188e-05	0.000264285	12	Q99J47	Dhrs7b	Dehydrogenase/reductase SDR family member 7B	DRS7B_MOUSE	14	-51.0687	0.489313	Nb	Hp	NaN	NaN	NaN
Nb / Hp	Q8BYI6	Q8BYI6	-1.51462	1.51462	3.65119e-05	0.000266829	12	Q8BYI6	Lpcat2	Lysophosphatidylcholine acyltransferase 2	PCAT2_MOUSE	5	-65.0012	0.349988	Nb	Hp	NaN	NaN	NaN
Nb / Control	Q9CYX7	Q9CYX7	-0.797676	0.797676	3.64899e-05	0.000266829	12	Q9CYX7	Rrp15	RRP15-like protein	RRP15_MOUSE	6	-42.4725	0.575275	Nb	Control	NaN	NaN	NaN
Nb / Hp	Q8K1B8	Q8K1B8	1.59228	1.59228	3.67342e-05	0.000267918	12	Q8K1B8	Fermt3	Fermitin family homolog 3	URP2_MOUSE	30	201.526	3.01526	Nb	Hp	NaN	NaN	NaN
Nb / Control	Q91VM5	Q91VM5	-1.25185	1.25185	3.71086e-05	0.000270088	12	Q91VM5	Rbmxl1	RNA binding motif protein, X-linked-like-1	RMXL1_MOUSE	29	-58.0091	0.419909	Nb	Control	NaN	NaN	NaN
Nb / Hp	Q9D2V8	Q9D2V8	-0.964423	0.964423	3.71796e-05	0.000270088	12	Q9D2V8	Mfsd10	Major facilitator superfamily domain-containing protein 10	MFS10_MOUSE	9	-48.7517	0.512483	Nb	Hp	NaN	NaN	NaN
Nb / Hp	Q9R1P1	Q9R1P1	2.09718	2.09718	3.73103e-05	0.0002705	12	Q9R1P1	Psmb3	Proteasome subunit beta type-3	PSB3_MOUSE	10	327.873	4.27873	Nb	Hp	NaN	NaN	NaN
Nb / Hp	Q9DCL9	Q9DCL9	0.846811	0.846811	3.7481e-05	0.000271199	12	Q9DCL9	Paics	Bifunctional phosphoribosylaminoimidazole carboxylase/phosphoribosylaminoimidazole succinocarboxamide synthetase	PUR6_MOUSE	31	79.8521	1.79852	Nb	Hp	NaN	NaN	NaN
Nb / Hp	Q99LH1	Q99LH1	-0.592827	0.592827	3.75932e-05	0.000271473	12	Q99LH1	Gnl2	Nucleolar GTP-binding protein 2	NOG2_MOUSE	21	-33.6958	0.663042	Nb	Hp	NaN	NaN	NaN
Nb / Hp	Q9D3W4	Q9D3W4	1.58236	1.58236	3.78486e-05	0.000272241	12	Q9D3W4	Gpn3	GPN-loop GTPase 3	GPN3_MOUSE	2	199.46	2.9946	Nb	Hp	NaN	NaN	NaN
Nb / Hp	Q9D819	Q9D819	2.09718	2.09718	3.78135e-05	0.000272241	12	Q9D819	Ppa1	Inorganic pyrophosphatase	IPYR_MOUSE	15	327.871	4.27871	Nb	Hp	NaN	NaN	NaN
Nb / Hp	Q99JF8	Q99JF8	-1.21014	1.21014	3.79574e-05	0.000272488	12	Q99JF8	Psip1	PC4 and SFRS1-interacting protein	PSIP1_MOUSE	15	-56.7774	0.432226	Nb	Hp	NaN	NaN	NaN
Nb / Hp	Q61595	Q61595	-1.17866	1.17866	3.85504e-05	0.000276202	12	Q61595	Ktn1	Kinectin	KTN1_MOUSE	23	-55.8239	0.441761	Nb	Hp	NaN	NaN	NaN
Nb / Control	P01966	P01966	-2.47195	2.47195	3.87814e-05	0.000276772	12	NaN	SWISS-PROT:P01966	(Bos taurus) Hemoglobin subunit alpha	NaN	7	-81.9753	0.180247	Nb	Control	NaN	NaN	NaN
Nb / Hp	Q62087	Q62087	-1.29898	1.29898	3.87389e-05	0.000276772	12	Q62087	Pon3	Serum paraoxonase/lactonase 3	PON3_MOUSE	11	-59.3586	0.406414	Nb	Hp	NaN	NaN	NaN
Nb / Hp	Q9CPT5	Q9CPT5	-1.61624	1.61624	3.89178e-05	0.000277204	12	Q9CPT5	Nop16	Nucleolar protein 16	NOP16_MOUSE	13	-67.3815	0.326185	Nb	Hp	NaN	NaN	NaN
Hp / Control	Q8K310	Q8K310	1.08273	1.08273	3.91644e-05	0.000278418	12	Q8K310	Matr3	Matrin-3	MATR3_MOUSE	37	111.804	2.11804	Hp	Control	NaN	NaN	NaN
Nb / Hp	Q8R3N6	Q8R3N6	-1.73445	1.73445	3.96088e-05	0.00028103	12	Q8R3N6	Thoc1	THO complex subunit 1	THOC1_MOUSE	12	-69.9477	0.300523	Nb	Hp	NaN	NaN	NaN
Nb / Hp	A2I7N0	A2I7N0	-2.28722	2.28722	3.99251e-05	0.000282141	12	NaN	TREMBL:A2I7N0;Q28922;Q3ZEJ6	(Bos taurus) SERPINA3-4	NaN	13	-79.513	0.20487	Nb	Hp	NaN	NaN	NaN
Nb / Hp	Q76KJ5	Q76KJ5	-2.10485	2.10485	4.01351e-05	0.000282141	12	Q76KJ5	Polr1g	DNA-directed RNA polymerase I subunit RPA34	RPA34_MOUSE	10	-76.7524	0.232476	Nb	Hp	NaN	NaN	NaN
Nb / Hp	Q91Z31	Q91Z31	-1.95107	1.95107	4.03059e-05	0.000282141	12	Q91Z31	Ptbp2	Polypyrimidine tract-binding protein 2	PTBP2_MOUSE	2	-74.1375	0.258625	Nb	Hp	NaN	NaN	NaN
Nb / Hp	Q99M04	Q99M04	-1.22907	1.22907	4.00067e-05	0.000282141	12	Q99M04	Lias	Lipoyl synthase, mitochondrial	LIAS_MOUSE	7	-57.3409	0.426591	Nb	Hp	NaN	NaN	NaN
Nb / Hp	Q9JM76	Q9JM76	1.13339	1.13339	4.02908e-05	0.000282141	12	Q9JM76	Arpc3	Actin-related protein 2/3 complex subunit 3	ARPC3_MOUSE	8	119.374	2.19374	Nb	Hp	NaN	NaN	NaN
Nb / Hp	Q9WU42	Q9WU42	-2.18689	2.18689	4.01645e-05	0.000282141	12	Q9WU42	Ncor2	Nuclear receptor corepressor 2	NCOR2_MOUSE	5	-78.0376	0.219624	Nb	Hp	NaN	NaN	NaN
Nb / Hp	Q9Z0F8	Q9Z0F8	-0.891743	0.891743	3.99799e-05	0.000282141	12	Q9Z0F8	Adam17	Disintegrin and metalloproteinase domain-containing protein 17	ADA17_MOUSE	16	-46.1037	0.538963	Nb	Hp	NaN	NaN	NaN
Nb / Hp	P97742	P97742	-0.859158	0.859158	4.03866e-05	0.000282166	12	P97742	Cpt1a	Carnitine O-palmitoyltransferase 1, liver isoform	CPT1A_MOUSE	19	-44.8726	0.551274	Nb	Hp	NaN	NaN	NaN
Nb / Hp	Q9DCN2	Q9DCN2	-0.927164	0.927164	4.04837e-05	0.000282304	12	Q9DCN2	Cyb5r3	NADH-cytochrome b5 reductase 3	NB5R3_MOUSE	19	-47.4109	0.525891	Nb	Hp	NaN	NaN	NaN
Nb / Hp	Q91VH2	Q91VH2	0.772953	0.772953	4.07171e-05	0.000282852	12	Q91VH2	Snx9	Sorting nexin-9	SNX9_MOUSE	12	70.8764	1.70876	Nb	Hp	NaN	NaN	NaN
Nb / Hp	Q9Z1P6	Q9Z1P6	-1.33818	1.33818	4.06568e-05	0.000282852	12	Q9Z1P6	Ndufa7	NADH dehydrogenase [ubiquinone] 1 alpha subcomplex subunit 7	NDUA7_MOUSE	6	-60.448	0.39552	Nb	Hp	NaN	NaN	NaN
Nb / Hp	Q60634	Q60634	-1.60449	1.60449	4.08447e-05	0.0002832	12	Q60634	Flot2	Flotillin-2	FLOT2_MOUSE	2	-67.1148	0.328852	Nb	Hp	NaN	NaN	NaN
Nb / Hp	ENSEMBL:ENSBTAP00000024146	ENSEMBL:ENSBTAP00000024146	-1.00862	1.00862	4.10092e-05	0.000283802	12	NaN	(Bos	taurus) similar to alpha-2-macroglobulin isoform 1	NaN	63	-50.2978	0.497022	Nb	Hp	NaN	NaN	NaN
Nb / Hp	O88520	O88520	3.16906	3.16906	4.11429e-05	0.000284189	12	O88520	Shoc2	Leucine-rich repeat protein SHOC-2	SHOC2_MOUSE	2	799.463	8.99463	Nb	Hp	NaN	NaN	NaN
Nb / Control	Q9CPT5	Q9CPT5	-1.54054	1.54054	4.13866e-05	0.000285333	12	Q9CPT5	Nop16	Nucleolar protein 16	NOP16_MOUSE	13	-65.6244	0.343756	Nb	Control	NaN	NaN	NaN
Nb / Hp	Q8C1Y8	Q8C1Y8	0.662808	0.662808	4.17741e-05	0.000287463	12	Q8C1Y8	Ccz1	Vacuolar fusion protein CCZ1 homolog	CCZ1_MOUSE	6	58.3161	1.58316	Nb	Hp	NaN	NaN	NaN
Nb / Control	P49722	P49722	1.43335	1.43335	4.22377e-05	0.000290106	12	P49722	Psma2	Proteasome subunit alpha type-2	PSA2_MOUSE	11	170.074	2.70074	Nb	Control	NaN	NaN	NaN
Nb / Hp	Q8R2Y8	Q8R2Y8	-0.88933	0.88933	4.24436e-05	0.000290945	12	Q8R2Y8	Ptrh2	Peptidyl-tRNA hydrolase 2, mitochondrial	PTH2_MOUSE	12	-46.0135	0.539865	Nb	Hp	NaN	NaN	NaN
Nb / Hp	Q99PT1	Q99PT1	1.46254	1.46254	4.25191e-05	0.000290945	12	Q99PT1	Arhgdia	Rho GDP-dissociation inhibitor 1	GDIR1_MOUSE	14	175.593	2.75593	Nb	Hp	NaN	NaN	NaN
Nb / Control	Q3SX09	Q3SX09	-2.48339	2.48339	4.26758e-05	0.000291471	12	NaN	TREMBL:Q3SX09	(Bos taurus) similar to HBG protein	NaN	10	-82.1176	0.178824	Nb	Control	NaN	NaN	NaN
Nb / Control	Q9R1P3	Q9R1P3	2.07035	2.07035	4.28867e-05	0.000292366	12	Q9R1P3	Psmb2	Proteasome subunit beta type-2	PSB2_MOUSE	9	319.987	4.19987	Nb	Control	NaN	NaN	NaN
Hp / Control	Q8BMZ5	Q8BMZ5	-1.58288	1.58288	4.29883e-05	0.000292512	12	Q8BMZ5	Tsen34	tRNA-splicing endonuclease subunit Sen34	SEN34_MOUSE	2	-66.6186	0.333814	Hp	Control	NaN	NaN	NaN
Nb / Control	Q28065	Q28065	-3.42986	3.42986	4.31197e-05	0.000292861	12	NaN	SWISS-PROT:Q28065	(Bos taurus) C4b-binding protein alpha chain precursor	NaN	9	-90.7208	0.0927919	Nb	Control	NaN	NaN	NaN
Nb / Hp	Q80UM7	Q80UM7	-1.19163	1.19163	4.32596e-05	0.000293266	12	Q80UM7	Mogs	Mannosyl-oligosaccharide glucosidase	MOGS_MOUSE	35	-56.2193	0.437807	Nb	Hp	NaN	NaN	NaN
Nb / Hp	Q8K3Z9	Q8K3Z9	-1.09358	1.09358	4.34446e-05	0.000293975	12	Q8K3Z9	Pom121	Nuclear envelope pore membrane protein POM 121	PO121_MOUSE	12	-53.1403	0.468597	Nb	Hp	NaN	NaN	NaN
Nb / Hp	Q91VD9	Q91VD9	-0.910352	0.910352	4.3585e-05	0.00029438	12	Q91VD9	Ndufs1	NADH-ubiquinone oxidoreductase 75 kDa subunit, mitochondrial	NDUS1_MOUSE	43	-46.7945	0.532055	Nb	Hp	NaN	NaN	NaN
Nb / Hp	Q06185	Q06185	-1.19328	1.19328	4.36725e-05	0.000294426	12	Q06185	Atp5me	ATP synthase subunit e, mitochondrial	ATP5I_MOUSE	6	-56.2693	0.437307	Nb	Hp	NaN	NaN	NaN
Nb / Hp	Q61598	Q61598	2.30993	2.30993	4.41775e-05	0.000296967	12	Q61598	Gdi2	Rab GDP dissociation inhibitor beta	GDIB_MOUSE	40	395.858	4.95858	Nb	Hp	NaN	NaN	NaN
Nb / Hp	Q9CR61	Q9CR61	-1.33766	1.33766	4.42118e-05	0.000296967	12	Q9CR61	Ndufb7	NADH dehydrogenase [ubiquinone] 1 beta subcomplex subunit 7	NDUB7_MOUSE	7	-60.4337	0.395663	Nb	Hp	NaN	NaN	NaN
Nb / Hp	Q9QZH6	Q9QZH6	-1.32215	1.32215	4.43761e-05	0.000297523	12	Q9QZH6	Ecsit	Evolutionarily conserved signaling intermediate in Toll pathway, mitochondrial	ECSIT_MOUSE	10	-60.0062	0.399938	Nb	Hp	NaN	NaN	NaN
Nb / Hp	Q9D0L7	Q9D0L7	-0.978267	0.978267	4.4686e-05	0.000298409	12	Q9D0L7	Armc10	Armadillo repeat-containing protein 10	ARM10_MOUSE	8	-49.2411	0.507589	Nb	Hp	NaN	NaN	NaN
Nb / Hp	Q9D1D4	Q9D1D4	-1.1021	1.1021	4.47532e-05	0.000298409	12	Q9D1D4	Tmed10	Transmembrane emp24 domain-containing protein 10	TMEDA_MOUSE	15	-53.4163	0.465837	Nb	Hp	NaN	NaN	NaN
Nb / Hp	Q9R1P3	Q9R1P3	2.39669	2.39669	4.46175e-05	0.000298409	12	Q9R1P3	Psmb2	Proteasome subunit beta type-2	PSB2_MOUSE	9	426.593	5.26593	Nb	Hp	NaN	NaN	NaN
Nb / Hp	Q8CD15	Q8CD15	0.872284	0.872284	4.51032e-05	0.000300195	12	Q8CD15	Riox2	Ribosomal oxygenase 2	RIOX2_MOUSE	8	83.0559	1.83056	Nb	Hp	NaN	NaN	NaN
Nb / Control	Q8QZY1	Q8QZY1	1.53448	1.53448	4.53218e-05	0.000300555	12	Q8QZY1	Eif3l	Eukaryotic translation initiation factor 3 subunit L	EIF3L_MOUSE	27	189.684	2.89684	Nb	Control	NaN	NaN	NaN
Nb / Hp	Q9D8V0	Q9D8V0	-0.854041	0.854041	4.5278e-05	0.000300555	12	Q9D8V0	Hm13	Minor histocompatibility antigen H13	HM13_MOUSE	6	-44.6767	0.553233	Nb	Hp	NaN	NaN	NaN
Nb / Hp	P62192	P62192	0.926076	0.926076	4.54456e-05	0.000300563	12	P62192	Psmc1	26S proteasome regulatory subunit 4	PRS4_MOUSE	27	90.0101	1.9001	Nb	Hp	NaN	NaN	NaN
Nb / Hp	Q8R4K2	Q8R4K2	2.7542	2.7542	4.54875e-05	0.000300563	12	Q8R4K2	Irak4	Interleukin-1 receptor-associated kinase 4	IRAK4_MOUSE	3	574.677	6.74677	Nb	Hp	NaN	NaN	NaN
Nb / Hp	Q8BTW8	Q8BTW8	-0.65711	0.65711	4.56849e-05	0.000301322	12	Q8BTW8	Cdk5rap1	Mitochondrial tRNA methylthiotransferase CDK5RAP1	CK5P1_MOUSE	4	-36.5853	0.634147	Nb	Hp	NaN	NaN	NaN
Nb / Hp	Q78IS1	Q78IS1	-1.29433	1.29433	4.59706e-05	0.00030266	12	Q78IS1	Tmed3	Transmembrane emp24 domain-containing protein 3	TMED3_MOUSE	5	-59.2274	0.407726	Nb	Hp	NaN	NaN	NaN
Nb / Hp	P97355	P97355	2.61195	2.61195	4.60808e-05	0.000302841	12	P97355	Sms	Spermine synthase	SPSY_MOUSE	6	511.329	6.11329	Nb	Hp	NaN	NaN	NaN
Nb / Hp	Q6DID7	Q6DID7	-0.963192	0.963192	4.62725e-05	0.00030301	12	Q6DID7	Wls	Protein wntless homolog	WLS_MOUSE	9	-48.7079	0.512921	Nb	Hp	NaN	NaN	NaN
Hp / Control	Q6P8I4	Q6P8I4	2.55431	2.55431	4.62139e-05	0.00030301	12	Q6P8I4	Pcnp	PEST proteolytic signal-containing nuclear protein	PCNP_MOUSE	4	487.387	5.87387	Hp	Control	NaN	NaN	NaN
Nb / Hp	O70551	O70551	0.753961	0.753961	4.64821e-05	0.000303838	12	O70551	Srpk1	SRSF protein kinase 1	SRPK1_MOUSE	7	68.6416	1.68642	Nb	Hp	NaN	NaN	NaN
Nb / Hp	O70480	O70480	-1.49133	1.49133	4.67388e-05	0.000304683	12	O70480	Vamp4	Vesicle-associated membrane protein 4	VAMP4_MOUSE	6	-64.4315	0.355685	Nb	Hp	NaN	NaN	NaN
Nb / Hp	Q8BHG1	Q8BHG1	2.17621	2.17621	4.67781e-05	0.000304683	12	Q8BHG1	Nrdc	Nardilysin	NRDC_MOUSE	16	351.963	4.51963	Nb	Hp	NaN	NaN	NaN
Nb / Hp	Q8BWT1	Q8BWT1	-0.357531	0.357531	4.69107e-05	0.000305003	12	Q8BWT1	Acaa2	3-ketoacyl-CoA thiolase, mitochondrial	THIM_MOUSE	17	-21.9501	0.780499	Nb	Hp	NaN	NaN	NaN
Nb / Hp	O35166	O35166	-1.79329	1.79329	4.73694e-05	0.000307438	12	O35166	Gosr2	Golgi SNAP receptor complex member 2	GOSR2_MOUSE	5	-71.1487	0.288513	Nb	Hp	NaN	NaN	NaN
Nb / Control	O88844	O88844	1.78956	1.78956	4.76635e-05	0.000308011	12	O88844	Idh1	Isocitrate dehydrogenase [NADP] cytoplasmic	IDHC_MOUSE	29	245.709	3.45709	Nb	Control	NaN	NaN	NaN
Nb / Hp	P70279	P70279	-1.4528	1.4528	4.77105e-05	0.000308011	12	P70279	Surf6	Surfeit locus protein 6	SURF6_MOUSE	16	-63.4689	0.365311	Nb	Hp	NaN	NaN	NaN
Nb / Hp	Q61655	Q61655	1.27229	1.27229	4.76873e-05	0.000308011	12	Q61655	Ddx19a	ATP-dependent RNA helicase DDX19A	DD19A_MOUSE	15	141.544	2.41544	Nb	Hp	NaN	NaN	NaN
Hp / Control	P28704	P28704	1.08462	1.08462	4.78484e-05	0.000308356	12	P28704	Rxrb	Retinoic acid receptor RXR-beta	RXRB_MOUSE	2	112.081	2.12081	Hp	Control	NaN	NaN	NaN
Nb / Control	Q9DBJ1	Q9DBJ1	1.43981	1.43981	4.83286e-05	0.000310902	12	Q9DBJ1	Pgam1	Phosphoglycerate mutase 1	PGAM1_MOUSE	18	171.286	2.71286	Nb	Control	NaN	NaN	NaN
Nb / Hp	P37913	P37913	0.899373	0.899373	4.86629e-05	0.000312503	12	P37913	Lig1	DNA ligase 1	DNLI1_MOUSE	24	86.5255	1.86526	Nb	Hp	NaN	NaN	NaN
Nb / Hp	Q9R099	Q9R099	-1.17054	1.17054	4.87677e-05	0.000312627	12	Q9R099	Tbl2	Transducin beta-like protein 2	TBL2_MOUSE	18	-55.5745	0.444255	Nb	Hp	NaN	NaN	NaN
Nb / Hp	P11928	P11928	-0.693273	0.693273	4.89827e-05	0.000312907	12	P11928	Oas1a	2'-5'-oligoadenylate synthase 1A	OAS1A_MOUSE	14	-38.1551	0.618449	Nb	Hp	NaN	NaN	NaN
Nb / Hp	Q91XB7	Q91XB7	-0.980192	0.980192	4.89066e-05	0.000312907	12	Q91XB7	Yif1a	Protein YIF1A	YIF1A_MOUSE	4	-49.3088	0.506912	Nb	Hp	NaN	NaN	NaN
Nb / Hp	Q8VE22	Q8VE22	-0.878591	0.878591	4.92851e-05	0.00031429	12	Q8VE22	Mrps23	Small ribosomal subunit protein mS23	RT23_MOUSE	13	-45.6102	0.543898	Nb	Hp	NaN	NaN	NaN
Nb / Hp	Q3V300	Q3V300	-1.2957	1.2957	4.96721e-05	0.000316205	12	Q3V300	Kif22	Kinesin-like protein KIF22	KIF22_MOUSE	14	-59.2662	0.407338	Nb	Hp	NaN	NaN	NaN
Nb / Hp	Q9CRY7	Q9CRY7	-1.36025	1.36025	5.00278e-05	0.000317916	12	Q9CRY7	Gdpd1	Lysophospholipase D GDPD1	GDPD1_MOUSE	5	-61.0485	0.389515	Nb	Hp	NaN	NaN	NaN
Nb / Hp	Q99JY4	Q99JY4	-1.33926	1.33926	5.04561e-05	0.000320081	12	Q99JY4	Trabd	TraB domain-containing protein	TRABD_MOUSE	9	-60.4777	0.395223	Nb	Hp	NaN	NaN	NaN
Hp / Control	Q9ES46	Q9ES46	-0.679562	0.679562	5.05652e-05	0.000320217	12	Q9ES46	Parvb	Beta-parvin	PARVB_MOUSE	4	-37.5645	0.624355	Hp	Control	NaN	NaN	NaN
Nb / Hp	Q05144	Q05144	0.485925	0.485925	5.09672e-05	0.000321944	12	Q05144	Rac2	Ras-related C3 botulinum toxin substrate 2	RAC2_MOUSE	5	40.0483	1.40048	Nb	Hp	NaN	NaN	NaN
Nb / Hp	Q8R1V4	Q8R1V4	-1.12527	1.12527	5.10141e-05	0.000321944	12	Q8R1V4	Tmed4	Transmembrane emp24 domain-containing protein 4	TMED4_MOUSE	8	-54.1583	0.458417	Nb	Hp	NaN	NaN	NaN
Nb / Control	P17809	P17809	-0.539321	0.539321	5.12926e-05	0.000322452	12	P17809	Slc2a1	Solute carrier family 2, facilitated glucose transporter member 1	GTR1_MOUSE	7	-31.1905	0.688095	Nb	Control	NaN	NaN	NaN
Nb / Hp	P61327	P61327	-0.735325	0.735325	5.13594e-05	0.000322452	12	P61327	Magoh	Protein mago nashi homolog	MGN_MOUSE	9	-39.9317	0.600683	Nb	Hp	NaN	NaN	NaN
Nb / Hp	Q9CR09	Q9CR09	2.02064	2.02064	5.1233e-05	0.000322452	12	Q9CR09	Ufc1	Ubiquitin-fold modifier-conjugating enzyme 1	UFC1_MOUSE	2	305.764	4.05764	Nb	Hp	NaN	NaN	NaN
Nb / Hp	P14206	P14206	2.03076	2.03076	5.15428e-05	0.000322496	12	P14206	Rpsa	Small ribosomal subunit protein uS2	RSSA_MOUSE	15	308.619	4.08619	Nb	Hp	NaN	NaN	NaN
Nb / Hp	P68510	P68510	1.86433	1.86433	5.15143e-05	0.000322496	12	P68510	Ywhah	14-3-3 protein eta	1433F_MOUSE	11	264.1	3.641	Nb	Hp	NaN	NaN	NaN
Hp / Control	P13011;P13516;Q99PL7	P13011;P13516;Q99PL7	1.57466	1.57466	5.22401e-05	0.000325188	12	P13011;P13516;Q99PL7	Scd2;Scd1;Scd3	Stearoyl-CoA desaturase 2;Acyl-CoA desaturase 1;Acyl-CoA desaturase 3	SCD2_MOUSE;ACOD1_MOUSE;SCD3_MOUSE	5	197.866	2.97866	Hp	Control	NaN	NaN	NaN
Nb / Hp	Q8BFR5	Q8BFR5	-0.414685	0.414685	5.21989e-05	0.000325188	12	Q8BFR5	Tufm	Elongation factor Tu, mitochondrial	EFTU_MOUSE	32	-24.9817	0.750183	Nb	Hp	NaN	NaN	NaN
Nb / Hp	Q9CPV4	Q9CPV4	1.5197	1.5197	5.20763e-05	0.000325188	12	Q9CPV4	Glod4	Glyoxalase domain-containing protein 4	GLOD4_MOUSE	13	186.731	2.86731	Nb	Hp	NaN	NaN	NaN
Nb / Control	P11499	P11499	1.42453	1.42453	5.24541e-05	0.000325412	12	P11499	Hsp90ab1	Heat shock protein HSP 90-beta	HS90B_MOUSE	60	168.427	2.68427	Nb	Control	NaN	NaN	NaN
Nb / Hp	Q62186	Q62186	-1.00324	1.00324	5.24307e-05	0.000325412	12	Q62186	Ssr4	Translocon-associated protein subunit delta	SSRD_MOUSE	7	-50.1121	0.498879	Nb	Hp	NaN	NaN	NaN
Nb / Hp	P28076	P28076	2.37426	2.37426	5.27913e-05	0.000326631	12	P28076	Psmb9	Proteasome subunit beta type-9	PSB9_MOUSE	4	418.47	5.1847	Nb	Hp	NaN	NaN	NaN
Nb / Hp	Q8BHL5	Q8BHL5	0.986802	0.986802	5.28294e-05	0.000326631	12	Q8BHL5	Elmo2	Engulfment and cell motility protein 2	ELMO2_MOUSE	10	98.1788	1.98179	Nb	Hp	NaN	NaN	NaN
Nb / Hp	P10711	P10711	0.963124	0.963124	5.32276e-05	0.000327983	12	P10711	Tcea1	Transcription elongation factor A protein 1	TCEA1_MOUSE	12	94.9527	1.94953	Nb	Hp	NaN	NaN	NaN
Nb / Control	Q9JK38	Q9JK38	1.78279	1.78279	5.31521e-05	0.000327983	12	Q9JK38	Gnpnat1	Glucosamine 6-phosphate N-acetyltransferase	GNA1_MOUSE	5	244.09	3.4409	Nb	Control	NaN	NaN	NaN
Nb / Hp	O70475	O70475	2.21053	2.21053	5.40531e-05	0.000331392	12	O70475	Ugdh	UDP-glucose 6-dehydrogenase	UGDH_MOUSE	8	362.845	4.62845	Nb	Hp	NaN	NaN	NaN
Nb / Control	P70302	P70302	-0.69081	0.69081	5.39806e-05	0.000331392	12	P70302	Stim1	Stromal interaction molecule 1	STIM1_MOUSE	4	-38.0494	0.619506	Nb	Control	NaN	NaN	NaN
Nb / Control	Q9D903	Q9D903	-2.21317	2.21317	5.39854e-05	0.000331392	12	Q9D903	Ebna1bp2	Probable rRNA-processing protein EBP2	EBP2_MOUSE	19	-78.434	0.21566	Nb	Control	NaN	NaN	NaN
Nb / Hp	P84096	P84096	-0.369064	0.369064	5.42763e-05	0.000331814	12	P84096	Rhog	Rho-related GTP-binding protein RhoG	RHOG_MOUSE	9	-22.5715	0.774285	Nb	Hp	NaN	NaN	NaN
Nb / Hp	Q9JK38	Q9JK38	2.43798	2.43798	5.43035e-05	0.000331814	12	Q9JK38	Gnpnat1	Glucosamine 6-phosphate N-acetyltransferase	GNA1_MOUSE	5	441.883	5.41883	Nb	Hp	NaN	NaN	NaN
Nb / Control	Q80W54	Q80W54	-1.05196	1.05196	5.46142e-05	0.000332047	12	Q80W54	Zmpste24	CAAX prenyl protease 1 homolog	FACE1_MOUSE	11	-51.7688	0.482312	Nb	Control	NaN	NaN	NaN
Nb / Hp	Q8BTS4	Q8BTS4	-0.892848	0.892848	5.45019e-05	0.000332047	12	Q8BTS4	Nup54	Nuclear pore complex protein Nup54	NUP54_MOUSE	18	-46.145	0.53855	Nb	Hp	NaN	NaN	NaN
Nb / Hp	Q8R2Q4	Q8R2Q4	-0.232213	0.232213	5.45654e-05	0.000332047	12	Q8R2Q4	Gfm2	Ribosome-releasing factor 2, mitochondrial	RRF2M_MOUSE	18	-14.8672	0.851328	Nb	Hp	NaN	NaN	NaN
Nb / Hp	P97429	P97429	1.32804	1.32804	5.48047e-05	0.000332588	12	P97429	Anxa4	Annexin A4	ANXA4_MOUSE	18	151.062	2.51062	Nb	Hp	NaN	NaN	NaN
Nb / Hp	Q6DVA0	Q6DVA0	-1.55376	1.55376	5.48852e-05	0.000332588	12	Q6DVA0	Lemd2	LEM domain-containing protein 2	LEMD2_MOUSE	11	-65.9379	0.340621	Nb	Hp	NaN	NaN	NaN
Nb / Hp	P21619	P21619	-0.809824	0.809824	5.57995e-05	0.000337113	12	P21619	Lmnb2	Lamin-B2	LMNB2_MOUSE	37	-42.9549	0.570451	Nb	Hp	NaN	NaN	NaN
Nb / Hp	P83887	P83887	1.42748	1.42748	5.58165e-05	0.000337113	12	P83887	Tubg1	Tubulin gamma-1 chain	TBG1_MOUSE	4	168.977	2.68977	Nb	Hp	NaN	NaN	NaN
Nb / Hp	P40142	P40142	2.11376	2.11376	5.64964e-05	0.000339536	12	P40142	Tkt	Transketolase	TKT_MOUSE	34	332.819	4.32819	Nb	Hp	NaN	NaN	NaN
Nb / Hp	Q5SWD9	Q5SWD9	1.44296	1.44296	5.64799e-05	0.000339536	12	Q5SWD9	Tsr1	Pre-rRNA-processing protein TSR1 homolog	TSR1_MOUSE	18	171.879	2.71879	Nb	Hp	NaN	NaN	NaN
Nb / Hp	Q8BRF7	Q8BRF7	-1.20199	1.20199	5.64058e-05	0.000339536	12	Q8BRF7	Scfd1	Sec1 family domain-containing protein 1	SCFD1_MOUSE	18	-56.5324	0.434676	Nb	Hp	NaN	NaN	NaN
Nb / Hp	HPOL_0001700401-mRNA-1	HPOL_0001700401-mRNA-1	2.38736	2.38736	5.71606e-05	0.000339721	12	NaN	transcript=HPOL_0001700401-mRNA-1	gene=HPOL_0001700401	NaN	4	423.198	5.23198	Nb	Hp	NaN	NaN	NaN
Nb / Hp	P62331	P62331	1.41937	1.41937	5.69272e-05	0.000339721	12	P62331	Arf6	ADP-ribosylation factor 6	ARF6_MOUSE	7	167.469	2.67469	Nb	Hp	NaN	NaN	NaN
Hp / Control	Q60668	Q60668	1.53901	1.53901	5.71779e-05	0.000339721	12	Q60668	Hnrnpd	Heterogeneous nuclear ribonucleoprotein D0	HNRPD_MOUSE	18	190.595	2.90595	Hp	Control	NaN	NaN	NaN
Nb / Hp	Q8VHZ7	Q8VHZ7	-0.887743	0.887743	5.7108e-05	0.000339721	12	Q8VHZ7	Imp4	U3 small nucleolar ribonucleoprotein protein IMP4	IMP4_MOUSE	10	-45.9541	0.540459	Nb	Hp	NaN	NaN	NaN
Nb / Hp	Q9CPW3	Q9CPW3	-2.15481	2.15481	5.68783e-05	0.000339721	12	Q9CPW3	Mrpl54	Large ribosomal subunit protein mL54	RM54_MOUSE	4	-77.5438	0.224562	Nb	Hp	NaN	NaN	NaN
Nb / Hp	Q9CQU3	Q9CQU3	-1.42369	1.42369	5.6705e-05	0.000339721	12	Q9CQU3	Rer1	Protein RER1	RER1_MOUSE	7	-62.7242	0.372758	Nb	Hp	NaN	NaN	NaN
Nb / Hp	Q9D3B1	Q9D3B1	-1.25639	1.25639	5.69423e-05	0.000339721	12	Q9D3B1	Hacd2	Very-long-chain (3R)-3-hydroxyacyl-CoA dehydratase 2	HACD2_MOUSE	4	-58.1409	0.418591	Nb	Hp	NaN	NaN	NaN
Nb / Hp	Q9CQC6	Q9CQC6	1.49378	1.49378	5.72737e-05	0.000339737	12	Q9CQC6	Bzw1	eIF5-mimic protein 2	5MP2_MOUSE	18	181.626	2.81626	Nb	Hp	NaN	NaN	NaN
Nb / Control	P07901	P07901	1.81871	1.81871	5.73933e-05	0.000339895	12	P07901	Hsp90aa1	Heat shock protein HSP 90-alpha	HS90A_MOUSE	39	252.766	3.52766	Nb	Control	NaN	NaN	NaN
Nb / Hp	O35375	O35375	-0.903275	0.903275	5.78011e-05	0.000340654	12	O35375	Nrp2	Neuropilin-2	NRP2_MOUSE	27	-46.5328	0.534672	Nb	Hp	NaN	NaN	NaN
Nb / Hp	P58389	P58389	1.71012	1.71012	5.77621e-05	0.000340654	12	P58389	Ptpa	Serine/threonine-protein phosphatase 2A activator	PTPA_MOUSE	12	227.189	3.27189	Nb	Hp	NaN	NaN	NaN
Nb / Hp	Q8R1B4	Q8R1B4	1.27971	1.27971	5.77364e-05	0.000340654	12	Q8R1B4	Eif3c	Eukaryotic translation initiation factor 3 subunit C	EIF3C_MOUSE	29	142.79	2.4279	Nb	Hp	NaN	NaN	NaN
Nb / Hp	P59017	P59017	-1.30058	1.30058	5.83586e-05	0.000343385	12	P59017	Bcl2l13	Bcl-2-like protein 13	B2L13_MOUSE	4	-59.4037	0.405963	Nb	Hp	NaN	NaN	NaN
Nb / Control	O88520	O88520	2.2231	2.2231	5.88406e-05	0.000344557	12	O88520	Shoc2	Leucine-rich repeat protein SHOC-2	SHOC2_MOUSE	2	366.895	4.66895	Nb	Control	NaN	NaN	NaN
Nb / Hp	P51660	P51660	-0.638894	0.638894	5.87621e-05	0.000344557	12	P51660	Hsd17b4	Peroxisomal multifunctional enzyme type 2	DHB4_MOUSE	33	-35.7795	0.642205	Nb	Hp	NaN	NaN	NaN
Nb / Hp	Q5XJE5	Q5XJE5	-0.936182	0.936182	5.88231e-05	0.000344557	12	Q5XJE5	Leo1	RNA polymerase-associated protein LEO1	LEO1_MOUSE	6	-47.7386	0.522614	Nb	Hp	NaN	NaN	NaN
Nb / Hp	Q9ES46	Q9ES46	2.03056	2.03056	5.8954e-05	0.000344669	12	Q9ES46	Parvb	Beta-parvin	PARVB_MOUSE	4	308.562	4.08562	Nb	Hp	NaN	NaN	NaN
Nb / Hp	Q02105	Q02105	-1.47821	1.47821	5.91184e-05	0.000345078	12	Q02105	C1qc	Complement C1q subcomponent subunit C	C1QC_MOUSE	6	-64.1067	0.358933	Nb	Hp	NaN	NaN	NaN
Nb / Control	O08739	O08739	1.7208	1.7208	5.93321e-05	0.000345773	12	O08739	Ampd3	AMP deaminase 3	AMPD3_MOUSE	3	229.619	3.29619	Nb	Control	NaN	NaN	NaN
Nb / Hp	Q9DB85	Q9DB85	-1.04367	1.04367	6.02101e-05	0.000350331	12	Q9DB85	Rrp8	Ribosomal RNA-processing protein 8	RRP8_MOUSE	11	-51.4909	0.485091	Nb	Hp	NaN	NaN	NaN
Nb / Hp	P70403	P70403	-1.60388	1.60388	6.0352e-05	0.000350598	12	P70403	Cux1	Protein CASP	CASP_MOUSE	3	-67.1009	0.328991	Nb	Hp	NaN	NaN	NaN
Nb / Hp	P56480	P56480	-0.761382	0.761382	6.05595e-05	0.000350688	12	P56480	Atp5f1b	ATP synthase subunit beta, mitochondrial	ATPB_MOUSE	32	-41.0069	0.589931	Nb	Hp	NaN	NaN	NaN
Nb / Hp	Q9D5T0	Q9D5T0	-1.21241	1.21241	6.05168e-05	0.000350688	12	Q9D5T0	Atad1	Outer mitochondrial transmembrane helix translocase	ATAD1_MOUSE	15	-56.8454	0.431546	Nb	Hp	NaN	NaN	NaN
Nb / Hp	Q9CWZ3	Q9CWZ3	-1.33686	1.33686	6.10316e-05	0.000352863	12	Q9CWZ3	Rbm8a	RNA-binding protein 8A	RBM8A_MOUSE	9	-60.412	0.39588	Nb	Hp	NaN	NaN	NaN
Nb / Hp	Q8CI59	Q8CI59	-0.924661	0.924661	6.13753e-05	0.000353731	12	Q8CI59	Steap3	Metalloreductase STEAP3	STEA3_MOUSE	14	-47.3196	0.526804	Nb	Hp	NaN	NaN	NaN
Nb / Hp	Q8R127	Q8R127	-1.12005	1.12005	6.13221e-05	0.000353731	12	Q8R127	Sccpdh	Saccharopine dehydrogenase-like oxidoreductase	SCPDL_MOUSE	8	-53.9924	0.460076	Nb	Hp	NaN	NaN	NaN
Nb / Hp	Q61029	Q61029	-2.02446	2.02446	6.26548e-05	0.000360536	12	Q61029	Tmpo	Lamina-associated polypeptide 2, isoforms beta/delta/epsilon/gamma	LAP2B_MOUSE	15	-75.4203	0.245797	Nb	Hp	NaN	NaN	NaN
Nb / Control	P22682	P22682	2.20699	2.20699	6.30246e-05	0.000360959	12	P22682	Cbl	E3 ubiquitin-protein ligase CBL	CBL_MOUSE	7	361.711	4.61711	Nb	Control	NaN	NaN	NaN
Nb / Control	Q7TPV4	Q7TPV4	-0.840822	0.840822	6.29712e-05	0.000360959	12	Q7TPV4	Mybbp1a	Myb-binding protein 1A	MBB1A_MOUSE	73	-44.1675	0.558325	Nb	Control	NaN	NaN	NaN
Nb / Hp	Q8BU33	Q8BU33	-1.01784	1.01784	6.29873e-05	0.000360959	12	Q8BU33	Ilvbl	2-hydroxyacyl-CoA lyase 2	HACL2_MOUSE	9	-50.6144	0.493856	Nb	Hp	NaN	NaN	NaN
Nb / Hp	P51863	P51863	-0.915239	0.915239	6.36138e-05	0.000362629	12	P51863	Atp6v0d1	V-type proton ATPase subunit d 1	VA0D1_MOUSE	18	-46.9744	0.530256	Nb	Hp	NaN	NaN	NaN
Nb / Hp	Q8R5M8	Q8R5M8	-1.62637	1.62637	6.35432e-05	0.000362629	12	Q8R5M8	Cadm1	Cell adhesion molecule 1	CADM1_MOUSE	7	-67.6098	0.323902	Nb	Hp	NaN	NaN	NaN
Nb / Hp	Q9EQH3	Q9EQH3	1.90502	1.90502	6.36077e-05	0.000362629	12	Q9EQH3	Vps35	Vacuolar protein sorting-associated protein 35	VPS35_MOUSE	21	274.514	3.74514	Nb	Hp	NaN	NaN	NaN
Nb / Hp	Q9CQV7	Q9CQV7	-0.885529	0.885529	6.39259e-05	0.00036384	12	Q9CQV7	Dnajc19	Mitochondrial import inner membrane translocase subunit TIM14	TIM14_MOUSE	7	-45.8711	0.541289	Nb	Hp	NaN	NaN	NaN
Nb / Control	P15497	P15497	-2.16766	2.16766	6.43609e-05	0.000365178	12	NaN	SWISS-PROT:P15497	(Bos taurus) Apolipoprotein A-I precursor	NaN	35	-77.7428	0.222572	Nb	Control	NaN	NaN	NaN
Nb / Control	Q8R2Y8	Q8R2Y8	-0.537334	0.537334	6.42752e-05	0.000365178	12	Q8R2Y8	Ptrh2	Peptidyl-tRNA hydrolase 2, mitochondrial	PTH2_MOUSE	12	-31.0957	0.689043	Nb	Control	NaN	NaN	NaN
Nb / Hp	O88939	O88939	-2.28268	2.28268	6.49612e-05	0.000365754	12	O88939	Zbtb7a	Zinc finger and BTB domain-containing protein 7A	ZBT7A_MOUSE	3	-79.4484	0.205516	Nb	Hp	NaN	NaN	NaN
Nb / Control	Q60520	Q60520	-1.05975	1.05975	6.49628e-05	0.000365754	12	Q60520	Sin3a	Paired amphipathic helix protein Sin3a	SIN3A_MOUSE	5	-52.0286	0.479714	Nb	Control	NaN	NaN	NaN
Nb / Hp	Q8BMZ5	Q8BMZ5	2.2029	2.2029	6.48541e-05	0.000365754	12	Q8BMZ5	Tsen34	tRNA-splicing endonuclease subunit Sen34	SEN34_MOUSE	2	360.403	4.60403	Nb	Hp	NaN	NaN	NaN
Nb / Hp	Q91YT0	Q91YT0	-1.01064	1.01064	6.4925e-05	0.000365754	12	Q91YT0	Ndufv1	NADH dehydrogenase [ubiquinone] flavoprotein 1, mitochondrial	NDUV1_MOUSE	20	-50.3676	0.496324	Nb	Hp	NaN	NaN	NaN
Nb / Hp	Q9QZB7	Q9QZB7	0.957093	0.957093	6.47341e-05	0.000365754	12	Q9QZB7	Actr10	Actin-related protein 10	ARP10_MOUSE	4	94.1394	1.94139	Nb	Hp	NaN	NaN	NaN
Nb / Control	Q9CT10	Q9CT10	1.7044	1.7044	6.51133e-05	0.000366037	12	Q9CT10	Ranbp3	Ran-binding protein 3	RANB3_MOUSE	10	225.893	3.25893	Nb	Control	NaN	NaN	NaN
Nb / Hp	Q6NXI6	Q6NXI6	-1.09124	1.09124	6.67406e-05	0.000374034	12	Q6NXI6	Rprd2	Regulation of nuclear pre-mRNA domain-containing protein 2	RPRD2_MOUSE	16	-53.0643	0.469357	Nb	Hp	NaN	NaN	NaN
Nb / Hp	Q9CX30	Q9CX30	-1.93637	1.93637	6.67139e-05	0.000374034	12	Q9CX30	Yif1b	Protein YIF1B	YIF1B_MOUSE	4	-73.8726	0.261274	Nb	Hp	NaN	NaN	NaN
Nb / Hp	Q8BG51	Q8BG51	-1.04738	1.04738	6.69307e-05	0.000374525	12	Q8BG51	Rhot1	Mitochondrial Rho GTPase 1	MIRO1_MOUSE	14	-51.6154	0.483846	Nb	Hp	NaN	NaN	NaN
Nb / Hp	Q9JIY5	Q9JIY5	-0.939495	0.939495	6.71647e-05	0.000375259	12	Q9JIY5	Htra2	Serine protease HTRA2, mitochondrial	HTRA2_MOUSE	17	-47.8585	0.521415	Nb	Hp	NaN	NaN	NaN
Nb / Hp	Q64518	Q64518	-1.35612	1.35612	6.73972e-05	0.000375621	12	Q64518	Atp2a3	Sarcoplasmic/endoplasmic reticulum calcium ATPase 3	AT2A3_MOUSE	9	-60.9369	0.390631	Nb	Hp	NaN	NaN	NaN
Nb / Hp	Q80WE4	Q80WE4	-1.26274	1.26274	6.7435e-05	0.000375621	12	Q80WE4	Kif20b	Kinesin-like protein KIF20B	KI20B_MOUSE	14	-58.3247	0.416753	Nb	Hp	NaN	NaN	NaN
Nb / Hp	P97808	P97808	-0.845662	0.845662	6.79577e-05	0.000377382	12	P97808	Fxyd5	FXYD domain-containing ion transport regulator 5	FXYD5_MOUSE	3	-44.3545	0.556455	Nb	Hp	NaN	NaN	NaN
Nb / Control	Q9WV55	Q9WV55	-1.95593	1.95593	6.79473e-05	0.000377382	12	Q9WV55	Vapa	Vesicle-associated membrane protein-associated protein A	VAPA_MOUSE	15	-74.2245	0.257755	Nb	Control	NaN	NaN	NaN
Nb / Control	Q80UM7	Q80UM7	-0.74082	0.74082	6.82229e-05	0.00037828	12	Q80UM7	Mogs	Mannosyl-oligosaccharide glucosidase	MOGS_MOUSE	35	-40.1601	0.598399	Nb	Control	NaN	NaN	NaN
Nb / Hp	Q791V5	Q791V5	-0.809105	0.809105	6.85447e-05	0.000379488	12	Q791V5	Mtch2	Mitochondrial carrier homolog 2	MTCH2_MOUSE	13	-42.9264	0.570736	Nb	Hp	NaN	NaN	NaN
Nb / Hp	P70168	P70168	0.834647	0.834647	6.91136e-05	0.000381531	12	P70168	Kpnb1	Importin subunit beta-1	IMB1_MOUSE	34	78.342	1.78342	Nb	Hp	NaN	NaN	NaN
Nb / Hp	Q9CQ56	Q9CQ56	-1.53323	1.53323	6.91225e-05	0.000381531	12	Q9CQ56	Use1	Vesicle transport protein USE1	USE1_MOUSE	9	-65.4498	0.345502	Nb	Hp	NaN	NaN	NaN
Nb / Hp	Q99J27	Q99J27	-1.39167	1.39167	6.9615e-05	0.000382541	12	Q99J27	Slc33a1	Acetyl-coenzyme A transporter 1	ACATN_MOUSE	7	-61.8876	0.381124	Nb	Hp	NaN	NaN	NaN
Nb / Hp	Q9DB20	Q9DB20	-1.42497	1.42497	6.95424e-05	0.000382541	12	Q9DB20	Atp5po	ATP synthase subunit O, mitochondrial	ATPO_MOUSE	19	-62.7574	0.372426	Nb	Hp	NaN	NaN	NaN
Nb / Hp	Q9ERN0	Q9ERN0	-1.26521	1.26521	6.96195e-05	0.000382541	12	Q9ERN0	Scamp2	Secretory carrier-associated membrane protein 2	SCAM2_MOUSE	3	-58.3961	0.416039	Nb	Hp	NaN	NaN	NaN
Nb / Hp	Q8BGH2	Q8BGH2	-0.731556	0.731556	7.03982e-05	0.000386239	12	Q8BGH2	Samm50	Sorting and assembly machinery component 50 homolog	SAM50_MOUSE	18	-39.7746	0.602254	Nb	Hp	NaN	NaN	NaN
Nb / Hp	Q69ZQ2	Q69ZQ2	-1.35758	1.35758	7.06415e-05	0.000386993	12	Q69ZQ2	Isy1	Pre-mRNA-splicing factor ISY1 homolog	ISY1_MOUSE	7	-60.9764	0.390236	Nb	Hp	NaN	NaN	NaN
Nb / Hp	Q9D024	Q9D024	-1.20927	1.20927	7.10989e-05	0.000388915	12	Q9D024	Ccdc47	PAT complex subunit CCDC47	CCD47_MOUSE	18	-56.7514	0.432486	Nb	Hp	NaN	NaN	NaN
Nb / Hp	G5E870	G5E870	-0.599304	0.599304	7.12219e-05	0.000389006	12	G5E870	Trip12	E3 ubiquitin-protein ligase TRIP12	TRIPC_MOUSE	39	-33.9928	0.660072	Nb	Hp	NaN	NaN	NaN
Nb / Control	Q8BY71	Q8BY71	1.80236	1.80236	7.18693e-05	0.00039139	12	Q8BY71	Hat1	Histone acetyltransferase type B catalytic subunit	HAT1_MOUSE	14	248.79	3.4879	Nb	Control	NaN	NaN	NaN
Nb / Hp	Q9DAV9	Q9DAV9	-0.922283	0.922283	7.18727e-05	0.00039139	12	Q9DAV9	Tmem38b	Trimeric intracellular cation channel type B	TM38B_MOUSE	8	-47.2327	0.527673	Nb	Hp	NaN	NaN	NaN
Nb / Hp	A2AJ88	A2AJ88	-1.10255	1.10255	7.27191e-05	0.000392233	12	A2AJ88	Pnpla7	Patatin-like phospholipase domain-containing protein 7	PLPL7_MOUSE	21	-53.4308	0.465692	Nb	Hp	NaN	NaN	NaN
Nb / Hp	O08795	O08795	-1.91709	1.91709	7.28664e-05	0.000392233	12	O08795	Prkcsh	Glucosidase 2 subunit beta	GLU2B_MOUSE	13	-73.5212	0.264788	Nb	Hp	NaN	NaN	NaN
Nb / Hp	Q64521	Q64521	-0.888938	0.888938	7.26279e-05	0.000392233	12	Q64521	Gpd2	Glycerol-3-phosphate dehydrogenase, mitochondrial	GPDM_MOUSE	39	-45.9989	0.540011	Nb	Hp	NaN	NaN	NaN
Nb / Hp	Q8CB77	Q8CB77	-1.62103	1.62103	7.28756e-05	0.000392233	12	Q8CB77	Eloa	Elongin-A	ELOA1_MOUSE	12	-67.4896	0.325104	Nb	Hp	NaN	NaN	NaN
Nb / Hp	Q8CG64	Q8CG64	-0.886623	0.886623	7.28862e-05	0.000392233	12	Q8CG64	Fkrp	Ribitol 5-phosphate transferase FKRP	FKRP_MOUSE	4	-45.9121	0.540879	Nb	Hp	NaN	NaN	NaN
Nb / Hp	Q8CIL4	Q8CIL4	-3.19836	3.19836	7.27245e-05	0.000392233	12	Q8CIL4	NaN	Uncharacterized protein C1orf131 homolog	CA131_MOUSE	7	-89.1057	0.108943	Nb	Hp	NaN	NaN	NaN
Nb / Hp	Q9D8M7	Q9D8M7	-1.28657	1.28657	7.28726e-05	0.000392233	12	Q9D8M7	Phf10	PHD finger protein 10	PHF10_MOUSE	5	-59.0074	0.409926	Nb	Hp	NaN	NaN	NaN
Nb / Hp	Q9WVK4	Q9WVK4	0.835387	0.835387	7.2802e-05	0.000392233	12	Q9WVK4	Ehd1	EH domain-containing protein 1	EHD1_MOUSE	22	78.4335	1.78434	Nb	Hp	NaN	NaN	NaN
Nb / Hp	P28650	P28650	1.9312	1.9312	7.30253e-05	0.000392404	12	P28650	Adss1	Adenylosuccinate synthetase isozyme 1	PURA1_MOUSE	14	281.373	3.81373	Nb	Hp	NaN	NaN	NaN
Nb / Control	Q9Z0R9	Q9Z0R9	-0.490185	0.490185	7.33673e-05	0.000393663	12	Q9Z0R9	Fads2	Acyl-CoA 6-desaturase	FADS2_MOUSE	12	-28.8066	0.711934	Nb	Control	NaN	NaN	NaN
Nb / Control	P07607	P07607	2.58765	2.58765	7.36216e-05	0.00039387	12	P07607	Tyms	Thymidylate synthase	TYSY_MOUSE	2	501.118	6.01118	Nb	Control	NaN	NaN	NaN
Nb / Hp	Q9WTM5	Q9WTM5	0.480376	0.480376	7.35555e-05	0.00039387	12	Q9WTM5	Ruvbl2	RuvB-like 2	RUVB2_MOUSE	34	39.5107	1.39511	Nb	Hp	NaN	NaN	NaN
Nb / Hp	Q61464	Q61464	-1.64101	1.64101	7.38132e-05	0.000394318	12	Q61464	Znf638	Zinc finger protein 638	ZN638_MOUSE	17	-67.9368	0.320632	Nb	Hp	NaN	NaN	NaN
Nb / Control	P39098	P39098	-0.619931	0.619931	7.43596e-05	0.000396273	12	P39098	Man1a2	Mannosyl-oligosaccharide 1,2-alpha-mannosidase IB	MA1A2_MOUSE	18	-34.9298	0.650702	Nb	Control	NaN	NaN	NaN
Nb / Hp	Q8R5H1	Q8R5H1	1.38304	1.38304	7.43961e-05	0.000396273	12	Q8R5H1	Usp15	Ubiquitin carboxyl-terminal hydrolase 15	UBP15_MOUSE	11	160.818	2.60818	Nb	Hp	NaN	NaN	NaN
Nb / Hp	O35704	O35704	-1.02522	1.02522	7.49939e-05	0.000397374	12	O35704	Sptlc1	Serine palmitoyltransferase 1	SPTC1_MOUSE	12	-50.8665	0.491335	Nb	Hp	NaN	NaN	NaN
Nb / Hp	Q80TM9	Q80TM9	1.1751	1.1751	7.51156e-05	0.000397374	12	Q80TM9	Nisch	Nischarin	NISCH_MOUSE	13	125.809	2.25809	Nb	Hp	NaN	NaN	NaN
Nb / Hp	Q8BYA0	Q8BYA0	2.41068	2.41068	7.51466e-05	0.000397374	12	Q8BYA0	Tbcd	Tubulin-specific chaperone D	TBCD_MOUSE	7	431.725	5.31725	Nb	Hp	NaN	NaN	NaN
Nb / Hp	Q8CFE6	Q8CFE6	-1.17052	1.17052	7.51273e-05	0.000397374	12	Q8CFE6	Slc38a2	Sodium-coupled neutral amino acid symporter 2	S38A2_MOUSE	6	-55.574	0.44426	Nb	Hp	NaN	NaN	NaN
Nb / Hp	Q91X78	Q91X78	-0.690383	0.690383	7.49904e-05	0.000397374	12	Q91X78	Erlin1	Erlin-1	ERLN1_MOUSE	14	-38.0311	0.619689	Nb	Hp	NaN	NaN	NaN
Nb / Control	Q9ERA0	Q9ERA0	1.67475	1.67475	7.55506e-05	0.000398933	12	Q9ERA0	Tfcp2	Alpha-globin transcription factor CP2	TFCP2_MOUSE	2	219.265	3.19265	Nb	Control	NaN	NaN	NaN
Nb / Control	Q9DCF9	Q9DCF9	-0.995654	0.995654	7.56814e-05	0.000399047	12	Q9DCF9	Ssr3	Translocon-associated protein subunit gamma	SSRG_MOUSE	3	-49.8492	0.501508	Nb	Control	NaN	NaN	NaN
Nb / Control	P62245	P62245	1.10291	1.10291	7.59789e-05	0.000399463	12	P62245	Rps15a	Small ribosomal subunit protein uS8	RS15A_MOUSE	14	114.787	2.14787	Nb	Control	NaN	NaN	NaN
Nb / Control	Q95121	Q95121	-1.96174	1.96174	7.59127e-05	0.000399463	12	NaN	SWISS-PROT:Q95121	(Bos taurus) Pigment epithelium-derived factor precursor	NaN	13	-74.3281	0.256719	Nb	Control	NaN	NaN	NaN
Nb / Hp	Q91Z53	Q91Z53	2.34486	2.34486	7.6371e-05	0.000400534	12	Q91Z53	Grhpr	Glyoxylate reductase/hydroxypyruvate reductase	GRHPR_MOUSE	4	408.011	5.08011	Nb	Hp	NaN	NaN	NaN
Nb / Hp	Q99PL5	Q99PL5	-1.70138	1.70138	7.64018e-05	0.000400534	12	Q99PL5	Rrbp1	Ribosome-binding protein 1	RRBP1_MOUSE	68	-69.2508	0.307492	Nb	Hp	NaN	NaN	NaN
Nb / Hp	P62962	P62962	2.33103	2.33103	7.66669e-05	0.000401348	12	P62962	Pfn1	Profilin-1	PROF1_MOUSE	16	403.164	5.03164	Nb	Hp	NaN	NaN	NaN
Nb / Control	O35864	O35864	1.76711	1.76711	7.74156e-05	0.000403699	12	O35864	Cops5	COP9 signalosome complex subunit 5	CSN5_MOUSE	12	240.372	3.40372	Nb	Control	NaN	NaN	NaN
Nb / Hp	Q78XF5	Q78XF5	-1.92309	1.92309	7.73705e-05	0.000403699	12	Q78XF5	Ostc	Oligosaccharyltransferase complex subunit OSTC	OSTC_MOUSE	4	-73.6311	0.263689	Nb	Hp	NaN	NaN	NaN
Nb / Hp	Q9CY27	Q9CY27	-1.23619	1.23619	7.74474e-05	0.000403699	12	Q9CY27	Tecr	Very-long-chain enoyl-CoA reductase	TECR_MOUSE	15	-57.5507	0.424493	Nb	Hp	NaN	NaN	NaN
Nb / Hp	P11499	P11499	1.39431	1.39431	7.87967e-05	0.000409564	12	P11499	Hsp90ab1	Heat shock protein HSP 90-beta	HS90B_MOUSE	60	162.862	2.62862	Nb	Hp	NaN	NaN	NaN
Nb / Hp	Q9R0I7	Q9R0I7	-1.86063	1.86063	7.87064e-05	0.000409564	12	Q9R0I7	Ylpm1	YLP motif-containing protein 1	YLPM1_MOUSE	9	-72.4644	0.275356	Nb	Hp	NaN	NaN	NaN
Nb / Hp	Q7TPR4	Q7TPR4	1.90132	1.90132	7.92691e-05	0.000411434	12	Q7TPR4	Actn1	Alpha-actinin-1	ACTN1_MOUSE	52	273.556	3.73556	Nb	Hp	NaN	NaN	NaN
Nb / Hp	O70126	O70126	-0.649606	0.649606	7.95259e-05	0.000411597	12	O70126	Aurkb	Aurora kinase B	AURKB_MOUSE	11	-36.2546	0.637454	Nb	Hp	NaN	NaN	NaN
Nb / Hp	Q0P678	Q0P678	-1.29333	1.29333	7.94197e-05	0.000411597	12	Q0P678	Zc3h18	Zinc finger CCCH domain-containing protein 18	ZCH18_MOUSE	6	-59.1991	0.408009	Nb	Hp	NaN	NaN	NaN
Nb / Hp	O08579	O08579	-1.56807	1.56807	7.98147e-05	0.000412508	12	O08579	Emd	Emerin	EMD_MOUSE	6	-66.2741	0.337259	Nb	Hp	NaN	NaN	NaN
Nb / Control	Q9JJZ4	Q9JJZ4	-1.1035	1.1035	7.99362e-05	0.000412552	12	Q9JJZ4	Ube2j1	Ubiquitin-conjugating enzyme E2 J1	UB2J1_MOUSE	4	-53.4614	0.465386	Nb	Control	NaN	NaN	NaN
Nb / Hp	P59481	P59481	-1.02177	1.02177	8.01603e-05	0.000413125	12	P59481	Lman2l	VIP36-like protein	LMA2L_MOUSE	6	-50.7487	0.492513	Nb	Hp	NaN	NaN	NaN
Nb / Control	Q499X9	Q499X9	-1.30306	1.30306	8.03755e-05	0.000413651	12	Q499X9	Mars2	Methionine--tRNA ligase, mitochondrial	SYMM_MOUSE	9	-59.4735	0.405265	Nb	Control	NaN	NaN	NaN
Nb / Hp	Q9QYF1	Q9QYF1	-0.693646	0.693646	8.07106e-05	0.000414791	12	Q9QYF1	Rdh11	Retinol dehydrogenase 11	RDH11_MOUSE	13	-38.1711	0.618289	Nb	Hp	NaN	NaN	NaN
Nb / Hp	P97287	P97287	-1.24675	1.24675	8.12462e-05	0.000415789	12	P97287	Mcl1	Induced myeloid leukemia cell differentiation protein Mcl-1 homolog	MCL1_MOUSE	7	-57.8605	0.421395	Nb	Hp	NaN	NaN	NaN
Nb / Hp	Q8CIG3	Q8CIG3	-1.28263	1.28263	8.10202e-05	0.000415789	12	Q8CIG3	Kdm1b	Lysine-specific histone demethylase 1B	KDM1B_MOUSE	3	-58.8955	0.411045	Nb	Hp	NaN	NaN	NaN
Nb / Hp	Q9WU40	Q9WU40	-1.59242	1.59242	8.11716e-05	0.000415789	12	Q9WU40	Lemd3	Inner nuclear membrane protein Man1	MAN1_MOUSE	15	-66.8386	0.331614	Nb	Hp	NaN	NaN	NaN
Hp / Control	REFSEQ:XP_001252647	REFSEQ:XP_001252647	2.37068	2.37068	8.14764e-05	0.000416384	12	NaN	(Bos	taurus) similar to endopin 2B	NaN	13	417.186	5.17186	Hp	Control	NaN	NaN	NaN
Nb / Hp	Q8CD10	Q8CD10	-1.2059	1.2059	8.17155e-05	0.000417023	12	Q8CD10	Micu2	Calcium uptake protein 2, mitochondrial	MICU2_MOUSE	6	-56.65	0.4335	Nb	Hp	NaN	NaN	NaN
Nb / Control	P60766	P60766	1.32899	1.32899	8.28614e-05	0.000421868	12	P60766	Cdc42	Cell division control protein 42 homolog	CDC42_MOUSE	10	151.228	2.51228	Nb	Control	NaN	NaN	NaN
Nb / Hp	P61161	P61161	1.02767	1.02767	8.28958e-05	0.000421868	12	P61161	Actr2	Actin-related protein 2	ARP2_MOUSE	18	103.873	2.03873	Nb	Hp	NaN	NaN	NaN
Nb / Hp	P24270	P24270	-0.504275	0.504275	8.30592e-05	0.000422111	12	P24270	Cat	Catalase	CATA_MOUSE	36	-29.4986	0.705014	Nb	Hp	NaN	NaN	NaN
Nb / Hp	Q9CQB5	Q9CQB5	-1.15536	1.15536	8.36213e-05	0.000424378	12	Q9CQB5	Cisd2	CDGSH iron-sulfur domain-containing protein 2	CISD2_MOUSE	6	-55.1046	0.448954	Nb	Hp	NaN	NaN	NaN
Nb / Hp	P22437	P22437	-1.15421	1.15421	8.39504e-05	0.000425458	12	P22437	Ptgs1	Prostaglandin G/H synthase 1	PGH1_MOUSE	3	-55.0688	0.449312	Nb	Hp	NaN	NaN	NaN
Hp / Control	P61979	P61979	1.24166	1.24166	8.45599e-05	0.000426182	12	P61979	Hnrnpk	Heterogeneous nuclear ribonucleoprotein K	HNRPK_MOUSE	27	136.47	2.3647	Hp	Control	NaN	NaN	NaN
Nb / Control	Q8BV66	Q8BV66	2.29163	2.29163	8.42301e-05	0.000426182	12	Q8BV66	Ifi44	Interferon-induced protein 44	IFI44_MOUSE	2	389.608	4.89608	Nb	Control	NaN	NaN	NaN
Nb / Hp	Q8R164	Q8R164	0.476513	0.476513	8.44675e-05	0.000426182	12	Q8R164	Bphl	Valacyclovir hydrolase	BPHL_MOUSE	4	39.1377	1.39138	Nb	Hp	NaN	NaN	NaN
Nb / Hp	Q9EQM6	Q9EQM6	-0.988846	0.988846	8.45054e-05	0.000426182	12	Q9EQM6	Dgcr8	Microprocessor complex subunit DGCR8	DGCR8_MOUSE	2	-49.6119	0.503881	Nb	Hp	NaN	NaN	NaN
Nb / Hp	Q9Z2U0	Q9Z2U0	1.94236	1.94236	8.5619e-05	0.000430925	12	Q9Z2U0	Psma7	Proteasome subunit alpha type-7	PSA7_MOUSE	15	284.333	3.84333	Nb	Hp	NaN	NaN	NaN
Nb / Control	P21107	P21107	2.3012	2.3012	8.59603e-05	0.000432048	12	P21107	Tpm3	Tropomyosin alpha-3 chain	TPM3_MOUSE	23	392.866	4.92866	Nb	Control	NaN	NaN	NaN
Hp / Control	Q64213	Q64213	1.27023	1.27023	8.61409e-05	0.000432361	12	Q64213	Sf1	Splicing factor 1	SF01_MOUSE	13	141.199	2.41199	Hp	Control	NaN	NaN	NaN
Nb / Hp	Q60692	Q60692	2.49485	2.49485	8.64555e-05	0.000432751	12	Q60692	Psmb6	Proteasome subunit beta type-6	PSB6_MOUSE	6	463.67	5.6367	Nb	Hp	NaN	NaN	NaN
Nb / Hp	Q60872	Q60872	1.7653	1.7653	8.64377e-05	0.000432751	12	Q60872	Eif1a	Eukaryotic translation initiation factor 1A	IF1A_MOUSE	6	239.945	3.39945	Nb	Hp	NaN	NaN	NaN
Nb / Hp	P19783	P19783	-0.982347	0.982347	8.65887e-05	0.000432825	12	P19783	Cox4i1	Cytochrome c oxidase subunit 4 isoform 1, mitochondrial	COX41_MOUSE	10	-49.3844	0.506156	Nb	Hp	NaN	NaN	NaN
Nb / Hp	Q8QZY1	Q8QZY1	1.47834	1.47834	8.69317e-05	0.000433946	12	Q8QZY1	Eif3l	Eukaryotic translation initiation factor 3 subunit L	EIF3L_MOUSE	27	178.628	2.78628	Nb	Hp	NaN	NaN	NaN
Hp / Control	Q62189	Q62189	1.04851	1.04851	8.71066e-05	0.000434226	12	Q62189	Snrpa	U1 small nuclear ribonucleoprotein A	SNRPA_MOUSE	9	106.84	2.0684	Hp	Control	NaN	NaN	NaN
Nb / Control	P56480	P56480	-0.541771	0.541771	8.81695e-05	0.000438685	12	P56480	Atp5f1b	ATP synthase subunit beta, mitochondrial	ATPB_MOUSE	32	-31.3073	0.686927	Nb	Control	NaN	NaN	NaN
Nb / Control	Q04750	Q04750	-1.08042	1.08042	8.82412e-05	0.000438685	12	Q04750	Top1	DNA topoisomerase 1	TOP1_MOUSE	42	-52.7108	0.472892	Nb	Control	NaN	NaN	NaN
Hp / Control	O88952	O88952	1.40233	1.40233	8.92337e-05	0.000442758	12	O88952	Lin7c	Protein lin-7 homolog C	LIN7C_MOUSE	3	164.328	2.64328	Hp	Control	NaN	NaN	NaN
Nb / Hp	Q6QD59	Q6QD59	-1.32134	1.32134	8.93028e-05	0.000442758	12	Q6QD59	Bnip1	Vesicle transport protein SEC20	SEC20_MOUSE	8	-59.9836	0.400164	Nb	Hp	NaN	NaN	NaN
Nb / Hp	P46460	P46460	-0.279779	0.279779	8.98753e-05	0.000444035	12	P46460	Nsf	Vesicle-fusing ATPase	NSF_MOUSE	34	-17.6283	0.823717	Nb	Hp	NaN	NaN	NaN
Nb / Control	Q01768	Q01768	2.06292	2.06292	8.99251e-05	0.000444035	12	Q01768	Nme2	Nucleoside diphosphate kinase B	NDKB_MOUSE	12	317.832	4.17832	Nb	Control	NaN	NaN	NaN
Nb / Hp	Q8BH07	Q8BH07	-0.898992	0.898992	8.97252e-05	0.000444035	12	Q8BH07	Arl6ip6	ADP-ribosylation factor-like protein 6-interacting protein 6	AR6P6_MOUSE	3	-46.3739	0.536261	Nb	Hp	NaN	NaN	NaN
Nb / Hp	Q3TXS7	Q3TXS7	1.24481	1.24481	9.02154e-05	0.000444268	12	Q3TXS7	Psmd1	26S proteasome non-ATPase regulatory subunit 1	PSMD1_MOUSE	33	136.987	2.36987	Nb	Hp	NaN	NaN	NaN
Nb / Hp	Q9R0P3	Q9R0P3	2.28434	2.28434	9.0146e-05	0.000444268	12	Q9R0P3	Esd	S-formylglutathione hydrolase	ESTD_MOUSE	11	387.141	4.87141	Nb	Hp	NaN	NaN	NaN
Nb / Hp	ENSEMBL:ENSBTAP00000007350	ENSEMBL:ENSBTAP00000007350	-1.1568	1.1568	9.13141e-05	0.000445302	12	NaN	(Bos	taurus) similar to Complement C4-A precursor	NaN	12	-55.1495	0.448505	Nb	Hp	NaN	NaN	NaN
Nb / Control	ENSEMBL:ENSBTAP00000024146	ENSEMBL:ENSBTAP00000024146	-0.565768	0.565768	9.07526e-05	0.000445302	12	NaN	(Bos	taurus) similar to alpha-2-macroglobulin isoform 1	NaN	63	-32.4404	0.675596	Nb	Control	NaN	NaN	NaN
Nb / Hp	P11688	P11688	-1.95846	1.95846	9.1181e-05	0.000445302	12	P11688	Itga5	Integrin alpha-5	ITA5_MOUSE	13	-74.2697	0.257303	Nb	Hp	NaN	NaN	NaN
Nb / Hp	Q5MJS3	Q5MJS3	-2.33095	2.33095	9.13152e-05	0.000445302	12	Q5MJS3	Fam20c	Extracellular serine/threonine protein kinase FAM20C	FA20C_MOUSE	6	-80.1246	0.198754	Nb	Hp	NaN	NaN	NaN
Nb / Hp	Q5U458	Q5U458	-1.18689	1.18689	9.1687e-05	0.000445302	12	Q5U458	Dnajc11	DnaJ homolog subfamily C member 11	DJC11_MOUSE	25	-56.0752	0.439248	Nb	Hp	NaN	NaN	NaN
Nb / Hp	Q61207	Q61207	-1.83259	1.83259	9.17659e-05	0.000445302	12	Q61207	Psap	Prosaposin	SAP_MOUSE	8	-71.9241	0.280759	Nb	Hp	NaN	NaN	NaN
Nb / Hp	Q8BKT7	Q8BKT7	-0.645442	0.645442	9.15373e-05	0.000445302	12	Q8BKT7	Thoc5	THO complex subunit 5 homolog	THOC5_MOUSE	15	-36.0703	0.639297	Nb	Hp	NaN	NaN	NaN
Nb / Hp	Q8BVY0	Q8BVY0	-1.47575	1.47575	9.14098e-05	0.000445302	12	Q8BVY0	Rsl1d1	Ribosomal L1 domain-containing protein 1	RL1D1_MOUSE	29	-64.0453	0.359547	Nb	Hp	NaN	NaN	NaN
Nb / Hp	Q93092	Q93092	2.58263	2.58263	9.11912e-05	0.000445302	12	Q93092	Taldo1	Transaldolase	TALDO_MOUSE	25	499.032	5.99032	Nb	Hp	NaN	NaN	NaN
Nb / Hp	Q9D6U8	Q9D6U8	-1.75613	1.75613	9.10108e-05	0.000445302	12	Q9D6U8	Fam162a	Protein FAM162A	F162A_MOUSE	7	-70.3958	0.296042	Nb	Hp	NaN	NaN	NaN
Nb / Hp	Q9DCW4	Q9DCW4	-0.927042	0.927042	9.17583e-05	0.000445302	12	Q9DCW4	Etfb	Electron transfer flavoprotein subunit beta	ETFB_MOUSE	16	-47.4065	0.525935	Nb	Hp	NaN	NaN	NaN
Nb / Hp	Q76MZ3	Q76MZ3	1.10714	1.10714	9.21233e-05	0.000446224	12	Q76MZ3	Ppp2r1a	Serine/threonine-protein phosphatase 2A 65 kDa regulatory subunit A alpha isoform	2AAA_MOUSE	27	115.418	2.15418	Nb	Hp	NaN	NaN	NaN
Nb / Control	Q9CPQ1	Q9CPQ1	-0.576233	0.576233	9.22e-05	0.000446224	12	Q9CPQ1	Cox6c	Cytochrome c oxidase subunit 6C	COX6C_MOUSE	7	-32.9287	0.670713	Nb	Control	NaN	NaN	NaN
Nb / Hp	O35857	O35857	-0.633042	0.633042	9.26888e-05	0.000446826	12	O35857	Timm44	Mitochondrial import inner membrane translocase subunit TIM44	TIM44_MOUSE	23	-35.5185	0.644815	Nb	Hp	NaN	NaN	NaN
Nb / Control	P60843	P60843	1.41871	1.41871	9.26914e-05	0.000446826	12	P60843	Eif4a1	Eukaryotic initiation factor 4A-I	IF4A1_MOUSE	29	167.346	2.67346	Nb	Control	NaN	NaN	NaN
Nb / Hp	Q8K021	Q8K021	-1.3224	1.3224	9.25135e-05	0.000446826	12	Q8K021	Scamp1	Secretory carrier-associated membrane protein 1	SCAM1_MOUSE	9	-60.013	0.39987	Nb	Hp	NaN	NaN	NaN
Nb / Hp	Q8CFE3	Q8CFE3	-0.930597	0.930597	9.28622e-05	0.00044706	12	Q8CFE3	Rcor1	REST corepressor 1	RCOR1_MOUSE	8	-47.5359	0.524641	Nb	Hp	NaN	NaN	NaN
Nb / Hp	O70439	O70439	-1.42898	1.42898	9.31694e-05	0.00044736	12	O70439	Stx7	Syntaxin-7	STX7_MOUSE	7	-62.8606	0.371394	Nb	Hp	NaN	NaN	NaN
Hp / Control	P00920	P00920	-0.497937	0.497937	9.31067e-05	0.00044736	12	P00920	Ca2	Carbonic anhydrase 2	CAH2_MOUSE	8	-29.1882	0.708118	Hp	Control	NaN	NaN	NaN
Nb / Hp	Q8CEE7	Q8CEE7	-0.72251	0.72251	9.35209e-05	0.000448458	12	Q8CEE7	Rdh13	Retinol dehydrogenase 13	RDH13_MOUSE	8	-39.3958	0.606042	Nb	Hp	NaN	NaN	NaN
Nb / Control	O70126	O70126	-0.794921	0.794921	9.43658e-05	0.00045149	12	O70126	Aurkb	Aurora kinase B	AURKB_MOUSE	11	-42.3625	0.576375	Nb	Control	NaN	NaN	NaN
Nb / Hp	Q1A7A4	Q1A7A4	-0.949139	0.949139	9.44002e-05	0.00045149	12	NaN	TREMBL:Q1A7A4	(Bos taurus) similar to complement component C5	NaN	4	-48.2058	0.517942	Nb	Hp	NaN	NaN	NaN
Nb / Hp	Q3SZ57	Q3SZ57	-2.44201	2.44201	9.48175e-05	0.000452893	12	NaN	SWISS-PROT:Q3SZ57	(Bos taurus) Alpha-fetoprotein precursor	NaN	30	-81.5973	0.184027	Nb	Hp	NaN	NaN	NaN
Nb / Control	Q80WW9	Q80WW9	-1.19945	1.19945	9.50693e-05	0.000452912	12	Q80WW9	Ddrgk1	DDRGK domain-containing protein 1	DDRGK_MOUSE	8	-56.4559	0.435441	Nb	Control	NaN	NaN	NaN
Nb / Hp	Q9R1P4	Q9R1P4	1.97926	1.97926	9.5043e-05	0.000452912	12	Q9R1P4	Psma1	Proteasome subunit alpha type-1	PSA1_MOUSE	17	294.291	3.94291	Nb	Hp	NaN	NaN	NaN
Nb / Hp	P59672	P59672	0.74494	0.74494	9.66678e-05	0.000459463	12	P59672	Anks1a	Ankyrin repeat and SAM domain-containing protein 1A	ANS1A_MOUSE	2	67.5905	1.67591	Nb	Hp	NaN	NaN	NaN
Nb / Hp	Q8BLN5	Q8BLN5	-1.24031	1.24031	9.66961e-05	0.000459463	12	Q8BLN5	Lss	Lanosterol synthase	LSS_MOUSE	25	-57.6717	0.423283	Nb	Hp	NaN	NaN	NaN
Nb / Hp	Q9CQZ0	Q9CQZ0	-1.56531	1.56531	9.68634e-05	0.000459661	12	Q9CQZ0	Ormdl2	ORM1-like protein 2	ORML2_MOUSE	3	-66.2094	0.337906	Nb	Hp	NaN	NaN	NaN
Nb / Hp	P24547	P24547	1.52575	1.52575	9.73541e-05	0.000460197	12	P24547	Impdh2	Inosine-5'-monophosphate dehydrogenase 2	IMDH2_MOUSE	26	187.937	2.87937	Nb	Hp	NaN	NaN	NaN
Nb / Hp	Q8BU14	Q8BU14	-0.953305	0.953305	9.71541e-05	0.000460197	12	Q8BU14	Sec62	Translocation protein SEC62	SEC62_MOUSE	5	-48.3552	0.516448	Nb	Hp	NaN	NaN	NaN
Nb / Control	Q99JX4	Q99JX4	1.99695	1.99695	9.73307e-05	0.000460197	12	Q99JX4	Eif3m	Eukaryotic translation initiation factor 3 subunit M	EIF3M_MOUSE	16	299.156	3.99156	Nb	Control	NaN	NaN	NaN
Nb / Hp	P29595	P29595	1.40706	1.40706	9.79735e-05	0.000462005	12	P29595	Nedd8	NEDD8	NEDD8_MOUSE	5	165.197	2.65197	Nb	Hp	NaN	NaN	NaN
Nb / Hp	Q62036	Q62036	-3.07257	3.07257	9.79896e-05	0.000462005	12	Q62036	Cep131	Centrosomal protein of 131 kDa	CP131_MOUSE	2	-88.1132	0.118868	Nb	Hp	NaN	NaN	NaN
Nb / Hp	P24788	P24788	-0.898778	0.898778	9.84383e-05	0.000463349	12	P24788	Cdk11b	Cyclin-dependent kinase 11B	CD11B_MOUSE	14	-46.3659	0.536341	Nb	Hp	NaN	NaN	NaN
Nb / Control	Q8K1A5	Q8K1A5	-0.868394	0.868394	9.85282e-05	0.000463349	12	Q8K1A5	Tmem41b	Transmembrane protein 41B	TM41B_MOUSE	4	-45.2244	0.547756	Nb	Control	NaN	NaN	NaN
Nb / Hp	Q3TFQ1	Q3TFQ1	-1.35279	1.35279	9.93114e-05	0.000466432	12	Q3TFQ1	Spryd7	SPRY domain-containing protein 7	SPRY7_MOUSE	2	-60.8465	0.391535	Nb	Hp	NaN	NaN	NaN
Nb / Hp	P97300	P97300	-0.603019	0.603019	9.9722e-05	0.000467759	12	P97300	Nptn	Neuroplastin	NPTN_MOUSE	8	-34.1625	0.658375	Nb	Hp	NaN	NaN	NaN
Nb / Hp	O35864	O35864	1.61103	1.61103	0.000100201	0.000469095	12	O35864	Cops5	COP9 signalosome complex subunit 5	CSN5_MOUSE	12	205.471	3.05471	Nb	Hp	NaN	NaN	NaN
Nb / Hp	Q6KCD5	Q6KCD5	-0.529368	0.529368	0.000100264	0.000469095	12	Q6KCD5	Nipbl	Nipped-B-like protein	NIPBL_MOUSE	17	-30.7142	0.692858	Nb	Hp	NaN	NaN	NaN
Nb / Hp	O88844	O88844	1.95723	1.95723	0.000100989	0.000470934	12	O88844	Idh1	Isocitrate dehydrogenase [NADP] cytoplasmic	IDHC_MOUSE	29	288.315	3.88315	Nb	Hp	NaN	NaN	NaN
Nb / Control	P62843	P62843	1.39248	1.39248	0.000101043	0.000470934	12	P62843	Rps15	Small ribosomal subunit protein uS19	RS15_MOUSE	5	162.529	2.62529	Nb	Control	NaN	NaN	NaN
Nb / Hp	Q8R4D1	Q8R4D1	-1.81913	1.81913	0.000100839	0.000470934	12	Q8R4D1	Slc9a8	Sodium/hydrogen exchanger 8	SL9A8_MOUSE	2	-71.6608	0.283392	Nb	Hp	NaN	NaN	NaN
Nb / Hp	Q8BS95	Q8BS95	-0.785938	0.785938	0.000101226	0.000471184	12	Q8BS95	Gpr89	Golgi pH regulator	GPHR_MOUSE	4	-42.0025	0.579975	Nb	Hp	NaN	NaN	NaN
Nb / Control	Q9Z2U0	Q9Z2U0	1.62373	1.62373	0.000102089	0.000474595	12	Q9Z2U0	Psma7	Proteasome subunit alpha type-7	PSA7_MOUSE	15	208.17	3.0817	Nb	Control	NaN	NaN	NaN
Nb / Control	Q9JME7	Q9JME7	2.30914	2.30914	0.000102409	0.000475477	12	Q9JME7	Trappc2l	Trafficking protein particle complex subunit 2-like protein	TPC2L_MOUSE	2	395.588	4.95588	Nb	Control	NaN	NaN	NaN
Nb / Hp	P17710	P17710	-0.63517	0.63517	0.000102984	0.00047694	12	P17710	Hk1	Hexokinase-1	HXK1_MOUSE	33	-35.6135	0.643865	Nb	Hp	NaN	NaN	NaN
Nb / Hp	Q07076	Q07076	1.36161	1.36161	0.000102888	0.00047694	12	Q07076	Anxa7	Annexin A7	ANXA7_MOUSE	18	156.972	2.56972	Nb	Hp	NaN	NaN	NaN
Nb / Control	Q9QZE7	Q9QZE7	2.448	2.448	0.000103362	0.000478083	12	Q9QZE7	Tsnax	Translin-associated protein X	TSNAX_MOUSE	7	445.66	5.4566	Nb	Control	NaN	NaN	NaN
Hp / Control	Q921F2	Q921F2	1.32303	1.32303	0.000103597	0.000478564	12	Q921F2	Tardbp	TAR DNA-binding protein 43	TADBP_MOUSE	16	150.191	2.50191	Hp	Control	NaN	NaN	NaN
Nb / Hp	Q80WW9	Q80WW9	-1.47039	1.47039	0.00010403	0.000479957	12	Q80WW9	Ddrgk1	DDRGK domain-containing protein 1	DDRGK_MOUSE	8	-63.9115	0.360885	Nb	Hp	NaN	NaN	NaN
Nb / Control	P30681	P30681	1.83797	1.83797	0.000104386	0.000480994	12	P30681	Hmgb2	High mobility group protein B2	HMGB2_MOUSE	18	257.507	3.57507	Nb	Control	NaN	NaN	NaN
Nb / Hp	B9EJR8	B9EJR8	2.48481	2.48481	0.000104772	0.000482164	12	B9EJR8	Dnaaf5	Dynein axonemal assembly factor 5	DAAF5_MOUSE	3	459.762	5.59762	Nb	Hp	NaN	NaN	NaN
Nb / Control	Q8VEG4	Q8VEG4	-1.52504	1.52504	0.000105174	0.000483288	12	Q8VEG4	Exd2	Exonuclease 3'-5' domain-containing protein 2	EXD2_MOUSE	5	-65.253	0.34747	Nb	Control	NaN	NaN	NaN
Nb / Hp	Q9Z1J3	Q9Z1J3	-0.366613	0.366613	0.000105281	0.000483288	12	Q9Z1J3	Nfs1	Cysteine desulfurase	NFS1_MOUSE	18	-22.4399	0.775601	Nb	Hp	NaN	NaN	NaN
Nb / Hp	Q8BVI5	Q8BVI5	-1.1178	1.1178	0.000105518	0.000483769	12	Q8BVI5	Stx16	Syntaxin-16	STX16_MOUSE	2	-53.9202	0.460798	Nb	Hp	NaN	NaN	NaN
Nb / Hp	Q5FWK3	Q5FWK3	1.7172	1.7172	0.000105856	0.000484709	12	Q5FWK3	Arhgap1	Rho GTPase-activating protein 1	RHG01_MOUSE	12	228.798	3.28798	Nb	Hp	NaN	NaN	NaN
Nb / Hp	Q8BUE4	Q8BUE4	1.05047	1.05047	0.000106382	0.000486509	12	Q8BUE4	Aifm2	Ferroptosis suppressor protein 1	FSP1_MOUSE	6	107.12	2.0712	Nb	Hp	NaN	NaN	NaN
Nb / Hp	Q8R1J3	Q8R1J3	-3.7106	3.7106	0.000106685	0.000486677	12	Q8R1J3	Zcchc9	Zinc finger CCHC domain-containing protein 9	ZCHC9_MOUSE	2	-92.3617	0.076383	Nb	Hp	NaN	NaN	NaN
Nb / Hp	Q9WTK3	Q9WTK3	-0.992709	0.992709	0.000106553	0.000486677	12	Q9WTK3	Gpaa1	Glycosylphosphatidylinositol anchor attachment 1 protein	GPAA1_MOUSE	8	-49.7467	0.502533	Nb	Hp	NaN	NaN	NaN
Nb / Hp	P01045-1	P01045-1	-2.25756	2.25756	0.00010785	0.000488221	12	NaN	SWISS-PROT:P01045-1	(Bos taurus) Isoform HMW of Kininogen-2 precursor	NaN	2	-79.0875	0.209125	Nb	Hp	NaN	NaN	NaN
Nb / Hp	P01966	P01966	-2.28329	2.28329	0.000107314	0.000488221	12	NaN	SWISS-PROT:P01966	(Bos taurus) Hemoglobin subunit alpha	NaN	7	-79.4571	0.205429	Nb	Hp	NaN	NaN	NaN
Nb / Hp	P04117	P04117	2.33188	2.33188	0.000107701	0.000488221	12	P04117	Fabp4	Fatty acid-binding protein, adipocyte	FABP4_MOUSE	7	403.46	5.0346	Nb	Hp	NaN	NaN	NaN
Nb / Hp	P61164	P61164	0.866632	0.866632	0.000107606	0.000488221	12	P61164	Actr1a	Alpha-centractin	ACTZ_MOUSE	13	82.3401	1.8234	Nb	Hp	NaN	NaN	NaN
Nb / Hp	Q8R146	Q8R146	2.70898	2.70898	0.000107847	0.000488221	12	Q8R146	Apeh	Acylamino-acid-releasing enzyme	ACPH_MOUSE	11	553.858	6.53858	Nb	Hp	NaN	NaN	NaN
Nb / Hp	Q9QZD8	Q9QZD8	-1.05657	1.05657	0.000107935	0.000488221	12	Q9QZD8	Slc25a10	Mitochondrial dicarboxylate carrier	DIC_MOUSE	15	-51.9226	0.480774	Nb	Hp	NaN	NaN	NaN
Nb / Hp	Q9Z0P5	Q9Z0P5	1.19691	1.19691	0.000107959	0.000488221	12	Q9Z0P5	Twf2	Twinfilin-2	TWF2_MOUSE	14	129.248	2.29248	Nb	Hp	NaN	NaN	NaN
Nb / Control	Q64310	Q64310	-0.540587	0.540587	0.000108358	0.000489421	12	Q64310	Surf4	Surfeit locus protein 4	SURF4_MOUSE	7	-31.2509	0.687491	Nb	Control	NaN	NaN	NaN
Nb / Hp	Q6PB44	Q6PB44	0.964432	0.964432	0.000108599	0.000489903	12	Q6PB44	Ptpn23	Tyrosine-protein phosphatase non-receptor type 23	PTN23_MOUSE	17	95.1295	1.9513	Nb	Hp	NaN	NaN	NaN
Nb / Hp	Q9Z0H1	Q9Z0H1	-1.00699	1.00699	0.000108797	0.000490191	12	Q9Z0H1	Wdr46	WD repeat-containing protein 46	WDR46_MOUSE	18	-50.2417	0.497583	Nb	Hp	NaN	NaN	NaN
Nb / Hp	P21981	P21981	1.23314	1.23314	0.000109866	0.000492646	12	P21981	Tgm2	Protein-glutamine gamma-glutamyltransferase 2	TGM2_MOUSE	11	135.078	2.35078	Nb	Hp	NaN	NaN	NaN
Nb / Hp	Q61316	Q61316	1.707	1.707	0.000109881	0.000492646	12	Q61316	Hspa4	Heat shock 70 kDa protein 4	HSP74_MOUSE	40	226.482	3.26482	Nb	Hp	NaN	NaN	NaN
Nb / Hp	Q7TMK9	Q7TMK9	0.830527	0.830527	0.000109785	0.000492646	12	Q7TMK9	Syncrip	Heterogeneous nuclear ribonucleoprotein Q	HNRPQ_MOUSE	32	77.8334	1.77833	Nb	Hp	NaN	NaN	NaN
Nb / Hp	Q8BZR9	Q8BZR9	-2.01848	2.01848	0.000109698	0.000492646	12	Q8BZR9	Ncbp3	Nuclear cap-binding protein subunit 3	NCBP3_MOUSE	7	-75.3182	0.246818	Nb	Hp	NaN	NaN	NaN
Nb / Hp	Q8R081	Q8R081	-0.79328	0.79328	0.000110044	0.000492772	12	Q8R081	Hnrnpl	Heterogeneous nuclear ribonucleoprotein L	HNRPL_MOUSE	24	-42.2969	0.577031	Nb	Hp	NaN	NaN	NaN
Nb / Hp	P47754	P47754	0.792708	0.792708	0.000110814	0.00049454	12	P47754	Capza2	F-actin-capping protein subunit alpha-2	CAZA2_MOUSE	7	73.2323	1.73232	Nb	Hp	NaN	NaN	NaN
Nb / Control	P62962	P62962	1.76028	1.76028	0.000110845	0.00049454	12	P62962	Pfn1	Profilin-1	PROF1_MOUSE	16	238.764	3.38764	Nb	Control	NaN	NaN	NaN
Nb / Hp	P98192	P98192	-1.88442	1.88442	0.000110645	0.00049454	12	P98192	Gnpat	Dihydroxyacetone phosphate acyltransferase	GNPAT_MOUSE	2	-72.9147	0.270853	Nb	Hp	NaN	NaN	NaN
Nb / Hp	Q8CI95;S4R1M9	Q8CI95;S4R1M9	1.25687	1.25687	0.000111198	0.000495509	12	Q8CI95;S4R1M9	Osbpl11;Osbpl10	Oxysterol-binding protein-related protein 11;Oxysterol-binding protein-related protein 10	OSB11_MOUSE;OSB10_MOUSE	2	138.976	2.38976	Nb	Hp	NaN	NaN	NaN
Nb / Control	Q9CR67	Q9CR67	-0.66681	0.66681	0.000111835	0.00049774	12	Q9CR67	Tmem33	Transmembrane protein 33	TMM33_MOUSE	9	-37.0102	0.629898	Nb	Control	NaN	NaN	NaN
Nb / Hp	O88508	O88508	-1.18945	1.18945	0.000112139	0.000498293	12	O88508	Dnmt3a	DNA (cytosine-5)-methyltransferase 3A	DNM3A_MOUSE	10	-56.153	0.43847	Nb	Hp	NaN	NaN	NaN
Nb / Hp	Q9DCH4	Q9DCH4	1.61606	1.61606	0.000112232	0.000498293	12	Q9DCH4	Eif3f	Eukaryotic translation initiation factor 3 subunit F	EIF3F_MOUSE	11	206.537	3.06537	Nb	Hp	NaN	NaN	NaN
Nb / Control	Q8R5H1	Q8R5H1	1.17755	1.17755	0.000112473	0.000498756	12	Q8R5H1	Usp15	Ubiquitin carboxyl-terminal hydrolase 15	UBP15_MOUSE	11	126.192	2.26192	Nb	Control	NaN	NaN	NaN
Nb / Hp	P09925	P09925	-1.32114	1.32114	0.000112959	0.000499995	12	P09925	Surf1	Surfeit locus protein 1	SURF1_MOUSE	9	-59.978	0.40022	Nb	Hp	NaN	NaN	NaN
Nb / Hp	Q9CPQ1	Q9CPQ1	-1.33917	1.33917	0.000113184	0.000499995	12	Q9CPQ1	Cox6c	Cytochrome c oxidase subunit 6C	COX6C_MOUSE	7	-60.4753	0.395247	Nb	Hp	NaN	NaN	NaN
Nb / Hp	Q9DC71	Q9DC71	-0.938745	0.938745	0.000113299	0.000499995	12	Q9DC71	Mrps15	Small ribosomal subunit protein uS15m	RT15_MOUSE	15	-47.8314	0.521686	Nb	Hp	NaN	NaN	NaN
Nb / Control	Q9Z160	Q9Z160	1.90141	1.90141	0.000113266	0.000499995	12	Q9Z160	Cog1	Conserved oligomeric Golgi complex subunit 1	COG1_MOUSE	5	273.579	3.73579	Nb	Control	NaN	NaN	NaN
Nb / Hp	B2RY56	B2RY56	-1.10975	1.10975	0.000115753	0.000508979	12	B2RY56	Rbm25	RNA-binding protein 25	RBM25_MOUSE	24	-53.6627	0.463373	Nb	Hp	NaN	NaN	NaN
Nb / Hp	Q6PA06	Q6PA06	-1.22711	1.22711	0.000115639	0.000508979	12	Q6PA06	Atl2	Atlastin-2	ATLA2_MOUSE	9	-57.2826	0.427174	Nb	Hp	NaN	NaN	NaN
Nb / Hp	Q9EQQ9	Q9EQQ9	1.65549	1.65549	0.000115728	0.000508979	12	Q9EQQ9	Oga	Protein O-GlcNAcase	OGA_MOUSE	9	215.03	3.1503	Nb	Hp	NaN	NaN	NaN
Nb / Hp	Q9CXZ1	Q9CXZ1	-2.41613	2.41613	0.000115906	0.000509039	12	Q9CXZ1	Ndufs4	NADH dehydrogenase [ubiquinone] iron-sulfur protein 4, mitochondrial	NDUS4_MOUSE	5	-81.2641	0.187359	Nb	Hp	NaN	NaN	NaN
Nb / Hp	P28800	P28800	-2.53046	2.53046	0.000116583	0.000511396	12	NaN	SWISS-PROT:P28800	(Bos taurus) Alpha-2-antiplasmin precursor	NaN	13	-82.6916	0.173084	Nb	Hp	NaN	NaN	NaN
Nb / Control	P52480	P52480	1.19199	1.19199	0.000116741	0.000511476	12	P52480	Pkm	Pyruvate kinase PKM	KPYM_MOUSE	53	128.467	2.28467	Nb	Control	NaN	NaN	NaN
Nb / Hp	Q9CZN7	Q9CZN7	0.498941	0.498941	0.000116961	0.000511827	12	Q9CZN7	Shmt2	Serine hydroxymethyltransferase, mitochondrial	GLYM_MOUSE	38	41.3175	1.41318	Nb	Hp	NaN	NaN	NaN
Nb / Hp	Q9D6K9	Q9D6K9	-1.1658	1.1658	0.000117239	0.000512428	12	Q9D6K9	Cers5	Ceramide synthase 5	CERS5_MOUSE	3	-55.4283	0.445717	Nb	Hp	NaN	NaN	NaN
Nb / Hp	P63001	P63001	0.89853	0.89853	0.000117556	0.000513201	12	P63001	Rac1	Ras-related C3 botulinum toxin substrate 1	RAC1_MOUSE	10	86.4165	1.86417	Nb	Hp	NaN	NaN	NaN
Hp / Control	P14148	P14148	-0.770947	0.770947	0.000118145	0.000515159	12	P14148	Rpl7	Large ribosomal subunit protein uL30	RL7_MOUSE	29	-41.3968	0.586032	Hp	Control	NaN	NaN	NaN
Nb / Hp	Q8R123	Q8R123	1.20948	1.20948	0.000118508	0.000516125	12	Q8R123	Flad1	FAD synthase	FAD1_MOUSE	8	131.254	2.31254	Nb	Hp	NaN	NaN	NaN
Nb / Hp	Q8K2B3	Q8K2B3	-0.711603	0.711603	0.000118871	0.000516866	12	Q8K2B3	Sdha	Succinate dehydrogenase [ubiquinone] flavoprotein subunit, mitochondrial	SDHA_MOUSE	30	-38.9359	0.610641	Nb	Hp	NaN	NaN	NaN
Nb / Hp	Q99LD4	Q99LD4	1.17128	1.17128	0.000118961	0.000516866	12	Q99LD4	Gps1	COP9 signalosome complex subunit 1	CSN1_MOUSE	11	125.211	2.25211	Nb	Hp	NaN	NaN	NaN
Nb / Control	P08030	P08030	2.05085	2.05085	0.000120069	0.000520442	12	P08030	Aprt	Adenine phosphoribosyltransferase	APT_MOUSE	11	314.35	4.1435	Nb	Control	NaN	NaN	NaN
Nb / Hp	Q58D62	Q58D62	-2.99811	2.99811	0.000120056	0.000520442	12	NaN	SWISS-PROT:Q58D62	(Bos taurus) Fetuin-B precursor	NaN	16	-87.4836	0.125164	Nb	Hp	NaN	NaN	NaN
Nb / Hp	Q8BK64	Q8BK64	1.3918	1.3918	0.000121339	0.000525324	12	Q8BK64	Ahsa1	Activator of 90 kDa heat shock protein ATPase homolog 1	AHSA1_MOUSE	19	162.407	2.62407	Nb	Hp	NaN	NaN	NaN
Nb / Hp	P00375	P00375	1.47714	1.47714	0.000122203	0.000525423	12	P00375	Dhfr	Dihydrofolate reductase	DYR_MOUSE	15	178.395	2.78395	Nb	Hp	NaN	NaN	NaN
Nb / Control	P14206	P14206	1.73889	1.73889	0.000123088	0.000525423	12	P14206	Rpsa	Small ribosomal subunit protein uS2	RSSA_MOUSE	15	233.777	3.33777	Nb	Control	NaN	NaN	NaN
Nb / Control	P62702	P62702	1.31807	1.31807	0.000122732	0.000525423	12	P62702	Rps4x	Small ribosomal subunit protein eS4	RS4X_MOUSE	32	149.332	2.49332	Nb	Control	NaN	NaN	NaN
Nb / Hp	Q08874	Q08874	-2.01203	2.01203	0.000121608	0.000525423	12	Q08874	Mitf	Microphthalmia-associated transcription factor	MITF_MOUSE	2	-75.2075	0.247925	Nb	Hp	NaN	NaN	NaN
Nb / Hp	Q3V209	Q3V209	-1.81214	1.81214	0.000122837	0.000525423	12	Q3V209	Tmub2	Transmembrane and ubiquitin-like domain-containing protein 2	TMUB2_MOUSE	3	-71.5231	0.284769	Nb	Hp	NaN	NaN	NaN
Nb / Hp	Q61072	Q61072	-1.08463	1.08463	0.000123036	0.000525423	12	Q61072	Adam9	Disintegrin and metalloproteinase domain-containing protein 9	ADAM9_MOUSE	6	-52.8488	0.471512	Nb	Hp	NaN	NaN	NaN
Nb / Hp	Q6PGB6	Q6PGB6	2.22727	2.22727	0.000122403	0.000525423	12	Q6PGB6	Naa50	N-alpha-acetyltransferase 50	NAA50_MOUSE	13	368.246	4.68246	Nb	Hp	NaN	NaN	NaN
Nb / Hp	Q8VCG3	Q8VCG3	-0.947958	0.947958	0.000122765	0.000525423	12	Q8VCG3	Wdr74	WD repeat-containing protein 74	WDR74_MOUSE	10	-48.1634	0.518366	Nb	Hp	NaN	NaN	NaN
Nb / Hp	Q91VX9	Q91VX9	-1.09427	1.09427	0.000122292	0.000525423	12	Q91VX9	Tmem168	Transmembrane protein 168	TM168_MOUSE	4	-53.1628	0.468372	Nb	Hp	NaN	NaN	NaN
Nb / Hp	Q921G7	Q921G7	-0.999994	0.999994	0.00012228	0.000525423	12	Q921G7	Etfdh	Electron transfer flavoprotein-ubiquinone oxidoreductase, mitochondrial	ETFD_MOUSE	21	-49.9998	0.500002	Nb	Hp	NaN	NaN	NaN
Nb / Hp	Q99P91	Q99P91	-1.27763	1.27763	0.000122616	0.000525423	12	Q99P91	Gpnmb	Transmembrane glycoprotein NMB	GPNMB_MOUSE	16	-58.7526	0.412474	Nb	Hp	NaN	NaN	NaN
Nb / Hp	Q9Z1X2	Q9Z1X2	-1.38773	1.38773	0.00012216	0.000525423	12	Q9Z1X2	Ptdss2	Phosphatidylserine synthase 2	PTSS2_MOUSE	4	-61.7834	0.382166	Nb	Hp	NaN	NaN	NaN
Nb / Hp	Q9ET30	Q9ET30	-0.993442	0.993442	0.000123659	0.000527245	12	Q9ET30	Tm9sf3	Transmembrane 9 superfamily member 3	TM9S3_MOUSE	14	-49.7722	0.502278	Nb	Hp	NaN	NaN	NaN
Nb / Hp	Q3TRM4	Q3TRM4	-1.141	1.141	0.000123894	0.000527631	12	Q3TRM4	Pnpla6	Patatin-like phospholipase domain-containing protein 6	PLPL6_MOUSE	6	-54.6555	0.453445	Nb	Hp	NaN	NaN	NaN
Nb / Hp	Q80W54	Q80W54	-1.24559	1.24559	0.000125442	0.000533601	12	Q80W54	Zmpste24	CAAX prenyl protease 1 homolog	FACE1_MOUSE	11	-57.8263	0.421737	Nb	Hp	NaN	NaN	NaN
Nb / Control	P23492	P23492	1.89417	1.89417	0.00012607	0.000535652	12	P23492	Pnp	Purine nucleoside phosphorylase	PNPH_MOUSE	16	271.707	3.71707	Nb	Control	NaN	NaN	NaN
Nb / Hp	Q9CQ79	Q9CQ79	1.57432	1.57432	0.000127878	0.000542072	12	Q9CQ79	Txndc9	Thioredoxin domain-containing protein 9	TXND9_MOUSE	4	197.794	2.97794	Nb	Hp	NaN	NaN	NaN
Nb / Hp	Q9D517	Q9D517	-1.03893	1.03893	0.000127785	0.000542072	12	Q9D517	Agpat3	1-acyl-sn-glycerol-3-phosphate acyltransferase gamma	PLCC_MOUSE	6	-51.331	0.48669	Nb	Hp	NaN	NaN	NaN
Nb / Hp	Q8C0C7	Q8C0C7	1.65112	1.65112	0.000128625	0.000544605	12	Q8C0C7	Farsa	Phenylalanine--tRNA ligase alpha subunit	SYFA_MOUSE	14	214.078	3.14078	Nb	Hp	NaN	NaN	NaN
Nb / Control	Q9D2V5	Q9D2V5	1.32004	1.32004	0.000130087	0.000550154	12	Q9D2V5	Aar2	Protein AAR2 homolog	AAR2_MOUSE	2	149.673	2.49673	Nb	Control	NaN	NaN	NaN
Nb / Hp	Q9R1S3	Q9R1S3	-1.18405	1.18405	0.000130236	0.000550154	12	Q9R1S3	Pign	GPI ethanolamine phosphate transferase 1	PIGN_MOUSE	9	-55.9886	0.440114	Nb	Hp	NaN	NaN	NaN
Nb / Hp	Q69ZK0	Q69ZK0	1.21886	1.21886	0.000130727	0.00055159	12	Q69ZK0	Prex1	Phosphatidylinositol 3,4,5-trisphosphate-dependent Rac exchanger 1 protein	PREX1_MOUSE	12	132.763	2.32763	Nb	Hp	NaN	NaN	NaN
Nb / Hp	O08547	O08547	-1.28044	1.28044	0.000131593	0.000553975	12	O08547	Sec22b	Vesicle-trafficking protein SEC22b	SC22B_MOUSE	18	-58.8329	0.411671	Nb	Hp	NaN	NaN	NaN
Nb / Hp	P22682	P22682	1.91408	1.91408	0.000131915	0.000553975	12	P22682	Cbl	E3 ubiquitin-protein ligase CBL	CBL_MOUSE	7	276.873	3.76873	Nb	Hp	NaN	NaN	NaN
Nb / Hp	P50429	P50429	0.916519	0.916519	0.000131942	0.000553975	12	P50429	Arsb	Arylsulfatase B	ARSB_MOUSE	5	88.7555	1.88756	Nb	Hp	NaN	NaN	NaN
Nb / Control	Q8BXC6	Q8BXC6	2.00787	2.00787	0.000131762	0.000553975	12	Q8BXC6	Commd2	COMM domain-containing protein 2	COMD2_MOUSE	3	302.188	4.02188	Nb	Control	NaN	NaN	NaN
Hp / Control	Q9WV84	Q9WV84	-0.697135	0.697135	0.00013205	0.000553975	12	Q9WV84	Nme4	Nucleoside diphosphate kinase, mitochondrial	NDKM_MOUSE	4	-38.3204	0.616796	Hp	Control	NaN	NaN	NaN
Nb / Hp	P63024	P63024	-1.55694	1.55694	0.00013299	0.000557276	12	P63024	Vamp3	Vesicle-associated membrane protein 3	VAMP3_MOUSE	8	-66.0128	0.339872	Nb	Hp	NaN	NaN	NaN
Nb / Hp	Q9Z0H4	Q9Z0H4	-1.9877	1.9877	0.000133646	0.000559382	12	Q9Z0H4	Celf2	CUGBP Elav-like family member 2	CELF2_MOUSE	16	-74.786	0.25214	Nb	Hp	NaN	NaN	NaN
Nb / Control	P12763	P12763	-1.87475	1.87475	0.000133859	0.000559633	12	NaN	SWISS-PROT:P12763	(Bos taurus) Alpha-2-HS-glycoprotein precursor	NaN	16	-72.7326	0.272674	Nb	Control	NaN	NaN	NaN
Nb / Hp	Q3UDR8	Q3UDR8	-1.19219	1.19219	0.000134301	0.000560841	12	Q3UDR8	Yipf3	Protein YIPF3	YIPF3_MOUSE	7	-56.2363	0.437637	Nb	Hp	NaN	NaN	NaN
Nb / Hp	Q9JHS9	Q9JHS9	-1.64176	1.64176	0.000134555	0.000561259	12	Q9JHS9	Cwc15	Spliceosome-associated protein CWC15 homolog	CWC15_MOUSE	4	-67.9534	0.320466	Nb	Hp	NaN	NaN	NaN
Nb / Hp	Q8BY71	Q8BY71	1.49178	1.49178	0.000135124	0.000562515	12	Q8BY71	Hat1	Histone acetyltransferase type B catalytic subunit	HAT1_MOUSE	14	181.235	2.81235	Nb	Hp	NaN	NaN	NaN
Nb / Hp	Q9JKK1	Q9JKK1	-1.97518	1.97518	0.000135164	0.000562515	12	Q9JKK1	Stx6	Syntaxin-6	STX6_MOUSE	2	-74.5662	0.254338	Nb	Hp	NaN	NaN	NaN
Nb / Hp	P23492	P23492	2.24709	2.24709	0.00013575	0.00056428	12	P23492	Pnp	Purine nucleoside phosphorylase	PNPH_MOUSE	16	374.726	4.74726	Nb	Hp	NaN	NaN	NaN
Nb / Hp	Q5SXY1	Q5SXY1	-1.21748	1.21748	0.000136051	0.00056428	12	Q5SXY1	Specc1	Cytospin-B	CYTSB_MOUSE	8	-56.9966	0.430034	Nb	Hp	NaN	NaN	NaN
Nb / Hp	Q8QZT1	Q8QZT1	-0.863364	0.863364	0.000135986	0.00056428	12	Q8QZT1	Acat1	Acetyl-CoA acetyltransferase, mitochondrial	THIL_MOUSE	22	-45.0331	0.549669	Nb	Hp	NaN	NaN	NaN
Nb / Hp	Q3TZX3	Q3TZX3	-0.733861	0.733861	0.000136289	0.000564625	12	Q3TZX3	Slc25a33	Solute carrier family 25 member 33	S2533_MOUSE	2	-39.8707	0.601293	Nb	Hp	NaN	NaN	NaN
Nb / Control	Q3TMX7	Q3TMX7	-0.700176	0.700176	0.00013779	0.000570198	12	Q3TMX7	Qsox2	Sulfhydryl oxidase 2	QSOX2_MOUSE	10	-38.4503	0.615497	Nb	Control	NaN	NaN	NaN
Nb / Hp	P61982	P61982	1.77885	1.77885	0.000139255	0.00057561	12	P61982	Ywhag	14-3-3 protein gamma	1433G_MOUSE	12	243.153	3.43153	Nb	Hp	NaN	NaN	NaN
Nb / Hp	Q9BCZ4	Q9BCZ4	-1.73082	1.73082	0.000139793	0.000577178	12	Q9BCZ4	Selenos	Selenoprotein S	SELS_MOUSE	5	-69.872	0.30128	Nb	Hp	NaN	NaN	NaN
Nb / Hp	Q9DB05	Q9DB05	-0.357653	0.357653	0.000140832	0.000580814	12	Q9DB05	Napa	Alpha-soluble NSF attachment protein	SNAA_MOUSE	18	-21.9567	0.780433	Nb	Hp	NaN	NaN	NaN
Nb / Hp	P52875	P52875	-1.79322	1.79322	0.000142743	0.000588032	12	P52875	Tmem165	Putative divalent cation/proton antiporter TMEM165	TM165_MOUSE	4	-71.1472	0.288528	Nb	Hp	NaN	NaN	NaN
Nb / Control	Q9DBS1	Q9DBS1	-0.878406	0.878406	0.000142956	0.000588244	12	Q9DBS1	Tmem43	Transmembrane protein 43	TMM43_MOUSE	22	-45.6032	0.543968	Nb	Control	NaN	NaN	NaN
Nb / Hp	P58252	P58252	2.2285	2.2285	0.000143715	0.000590702	12	P58252	Eef2	Elongation factor 2	EF2_MOUSE	64	368.648	4.68648	Nb	Hp	NaN	NaN	NaN
Nb / Hp	O88983	O88983	-1.13066	1.13066	0.000145337	0.000595358	12	O88983	Stx8	Syntaxin-8	STX8_MOUSE	7	-54.3292	0.456708	Nb	Hp	NaN	NaN	NaN
Nb / Control	Q8BLF1	Q8BLF1	-0.493944	0.493944	0.000145079	0.000595358	12	Q8BLF1	Nceh1	Neutral cholesterol ester hydrolase 1	NCEH1_MOUSE	18	-28.9919	0.710081	Nb	Control	NaN	NaN	NaN
Nb / Hp	Q9QZD9	Q9QZD9	1.4869	1.4869	0.000145242	0.000595358	12	Q9QZD9	Eif3i	Eukaryotic translation initiation factor 3 subunit I	EIF3I_MOUSE	17	180.286	2.80286	Nb	Hp	NaN	NaN	NaN
Nb / Hp	Q3TIR3	Q3TIR3	1.77108	1.77108	0.000146354	0.000598853	12	Q3TIR3	Ric8a	Synembryn-A	RIC8A_MOUSE	5	241.31	3.4131	Nb	Hp	NaN	NaN	NaN
Nb / Hp	P48678	P48678	-0.668511	0.668511	0.000146705	0.000599619	12	P48678	Lmna	Prelamin-A/C	LMNA_MOUSE	82	-37.0844	0.629156	Nb	Hp	NaN	NaN	NaN
Nb / Hp	P30681	P30681	1.205	1.205	0.00014712	0.000599645	12	P30681	Hmgb2	High mobility group protein B2	HMGB2_MOUSE	18	130.537	2.30537	Nb	Hp	NaN	NaN	NaN
Nb / Control	Q61194	Q61194	1.33658	1.33658	0.000146916	0.000599645	12	Q61194	Pik3c2a	Phosphatidylinositol 4-phosphate 3-kinase C2 domain-containing subunit alpha	P3C2A_MOUSE	4	152.552	2.52552	Nb	Control	NaN	NaN	NaN
Nb / Hp	Q9JHF7	Q9JHF7	1.54182	1.54182	0.000147204	0.000599645	12	Q9JHF7	Hpgds	Hematopoietic prostaglandin D synthase	HPGDS_MOUSE	4	191.162	2.91162	Nb	Hp	NaN	NaN	NaN
Nb / Hp	HPOL_0000349301-mRNA-1;Nippo_chrV.g14210.t1;Nippo_chrV.g14210.t2;Nippo_chrV.g14210.t3;Nippo_chrV.g14210.t4;Nippo_chrV.g14210.t5	HPOL_0000349301-mRNA-1;Nippo_chrV.g14210.t1;Nippo_chrV.g14210.t2;Nippo_chrV.g14210.t3;Nippo_chrV.g14210.t4;Nippo_chrV.g14210.t5	1.04034	1.04034	0.000147746	0.000599919	12	NaN	transcript=HPOL_0000349301-mRNA-1;transcript=Nippo_chrV.g14210.t1;transcript=Nippo_chrV.g14210.t2;transcript=Nippo_chrV.g14210.t3;transcript=Nippo_chrV.g14210.t4;transcript=Nippo_chrV.g14210.t5	gene=HPOL_0000349301;gene=Nippo_chrV.g14210;gene=Nippo_chrV.g14210;gene=Nippo_chrV.g14210;gene=Nippo_chrV.g14210;gene=Nippo_chrV.g14210	NaN	4	105.671	2.05671	Nb	Hp	NaN	NaN	NaN
Hp / Control	O70309	O70309	1.11291	1.11291	0.000147763	0.000599919	12	O70309	Itgb5	Integrin beta-5	ITB5_MOUSE	8	116.282	2.16282	Hp	Control	NaN	NaN	NaN
Nb / Control	Q3TSG4	Q3TSG4	1.99391	1.99391	0.000147632	0.000599919	12	Q3TSG4	Alkbh5	RNA demethylase ALKBH5	ALKB5_MOUSE	3	298.315	3.98315	Nb	Control	NaN	NaN	NaN
Nb / Hp	Q3TLH4	Q3TLH4	-0.861298	0.861298	0.000148297	0.000601416	12	Q3TLH4	Prrc2c	Protein PRRC2C	PRC2C_MOUSE	17	-44.9543	0.550457	Nb	Hp	NaN	NaN	NaN
Nb / Hp	Q9CQV8	Q9CQV8	1.70003	1.70003	0.000148605	0.000601806	12	Q9CQV8	Ywhab	14-3-3 protein beta/alpha	1433B_MOUSE	19	224.907	3.24907	Nb	Hp	NaN	NaN	NaN
Nb / Control	Q9R062	Q9R062	1.95768	1.95768	0.000148722	0.000601806	12	Q9R062	Gyg1	Glycogenin-1	GLYG_MOUSE	6	288.436	3.88436	Nb	Control	NaN	NaN	NaN
Nb / Hp	P08249	P08249	0.696982	0.696982	0.00014948	0.000602065	12	P08249	Mdh2	Malate dehydrogenase, mitochondrial	MDHM_MOUSE	27	62.111	1.62111	Nb	Hp	NaN	NaN	NaN
Nb / Hp	P11276	P11276	-1.42624	1.42624	0.000150382	0.000602065	12	P11276	Fn1	Fibronectin	FINC_MOUSE	3	-62.79	0.3721	Nb	Hp	NaN	NaN	NaN
Nb / Hp	P32233	P32233	1.08443	1.08443	0.000149661	0.000602065	12	P32233	Drg1	Developmentally-regulated GTP-binding protein 1	DRG1_MOUSE	17	112.054	2.12054	Nb	Hp	NaN	NaN	NaN
Nb / Hp	P46978	P46978	-1.00089	1.00089	0.000149167	0.000602065	12	P46978	Stt3a	Dolichyl-diphosphooligosaccharide--protein glycosyltransferase subunit STT3A	STT3A_MOUSE	25	-50.031	0.49969	Nb	Hp	NaN	NaN	NaN
Nb / Hp	P63158	P63158	1.33052	1.33052	0.000150716	0.000602065	12	P63158	Hmgb1	High mobility group protein B1	HMGB1_MOUSE	15	151.492	2.51492	Nb	Hp	NaN	NaN	NaN
Nb / Hp	Q7TND5	Q7TND5	-1.02228	1.02228	0.000149512	0.000602065	12	Q7TND5	Rpf1	Ribosome production factor 1	RPF1_MOUSE	12	-50.7663	0.492337	Nb	Hp	NaN	NaN	NaN
Nb / Control	Q810D6	Q810D6	0.743426	0.743426	0.000150115	0.000602065	12	Q810D6	Grwd1	Glutamate-rich WD repeat-containing protein 1	GRWD1_MOUSE	11	67.4147	1.67415	Nb	Control	NaN	NaN	NaN
Nb / Hp	Q99LB0	Q99LB0	-1.39135	1.39135	0.000151152	0.000602065	12	Q99LB0	Dnttip1	Deoxynucleotidyltransferase terminal-interacting protein 1	TDIF1_MOUSE	6	-61.8791	0.381209	Nb	Hp	NaN	NaN	NaN
Nb / Control	Q9CXZ1	Q9CXZ1	-1.88565	1.88565	0.000151236	0.000602065	12	Q9CXZ1	Ndufs4	NADH dehydrogenase [ubiquinone] iron-sulfur protein 4, mitochondrial	NDUS4_MOUSE	5	-72.9378	0.270622	Nb	Control	NaN	NaN	NaN
Nb / Control	Q9D0M3	Q9D0M3	-0.655267	0.655267	0.000151131	0.000602065	12	Q9D0M3	Cyc1	Cytochrome c1, heme protein, mitochondrial	CY1_MOUSE	12	-36.5042	0.634958	Nb	Control	NaN	NaN	NaN
Nb / Control	Q9DBE9	Q9DBE9	-1.65436	1.65436	0.000150358	0.000602065	12	Q9DBE9	Ftsj3	pre-rRNA 2'-O-ribose RNA methyltransferase FTSJ3	SPB1_MOUSE	31	-68.2321	0.317679	Nb	Control	NaN	NaN	NaN
Nb / Hp	Q9DBG7	Q9DBG7	-0.88361	0.88361	0.000151258	0.000602065	12	Q9DBG7	Srpra	Signal recognition particle receptor subunit alpha	SRPRA_MOUSE	20	-45.7991	0.542009	Nb	Hp	NaN	NaN	NaN
Nb / Hp	Q9QUR6	Q9QUR6	2.44154	2.44154	0.000151091	0.000602065	12	Q9QUR6	Prep	Prolyl endopeptidase	PPCE_MOUSE	30	443.222	5.43222	Nb	Hp	NaN	NaN	NaN
Nb / Hp	Q9R062	Q9R062	1.83583	1.83583	0.000149284	0.000602065	12	Q9R062	Gyg1	Glycogenin-1	GLYG_MOUSE	6	256.976	3.56976	Nb	Hp	NaN	NaN	NaN
Nb / Hp	Q9Z2U1	Q9Z2U1	1.56384	1.56384	0.000150175	0.000602065	12	Q9Z2U1	Psma5	Proteasome subunit alpha type-5	PSA5_MOUSE	11	195.639	2.95639	Nb	Hp	NaN	NaN	NaN
Nb / Control	P46978	P46978	-0.701073	0.701073	0.000153024	0.000607535	12	P46978	Stt3a	Dolichyl-diphosphooligosaccharide--protein glycosyltransferase subunit STT3A	STT3A_MOUSE	25	-38.4886	0.615114	Nb	Control	NaN	NaN	NaN
Nb / Hp	Q8JZX4	Q8JZX4	-1.51587	1.51587	0.000152927	0.000607535	12	Q8JZX4	Rbm17	Splicing factor 45	SPF45_MOUSE	16	-65.0315	0.349685	Nb	Hp	NaN	NaN	NaN
Nb / Hp	Q9EQ06	Q9EQ06	-1.02243	1.02243	0.000153131	0.000607535	12	Q9EQ06	Hsd17b11	Estradiol 17-beta-dehydrogenase 11	DHB11_MOUSE	12	-50.7715	0.492285	Nb	Hp	NaN	NaN	NaN
Nb / Hp	O35387	O35387	-1.32599	1.32599	0.00015331	0.000607585	12	O35387	Hax1	HCLS1-associated protein X-1	HAX1_MOUSE	10	-60.1126	0.398874	Nb	Hp	NaN	NaN	NaN
Nb / Hp	P13011;P13516;Q99PL7	P13011;P13516;Q99PL7	-1.47132	1.47132	0.000154386	0.000611092	12	P13011;P13516;Q99PL7	Scd2;Scd1;Scd3	Stearoyl-CoA desaturase 2;Acyl-CoA desaturase 1;Acyl-CoA desaturase 3	SCD2_MOUSE;ACOD1_MOUSE;SCD3_MOUSE	5	-63.9349	0.360651	Nb	Hp	NaN	NaN	NaN
Nb / Hp	Q9CR62	Q9CR62	-0.797555	0.797555	0.000154529	0.000611092	12	Q9CR62	Slc25a11	Mitochondrial 2-oxoglutarate/malate carrier protein	M2OM_MOUSE	22	-42.4677	0.575323	Nb	Hp	NaN	NaN	NaN
Nb / Hp	Q3MHN5	Q3MHN5	-2.48587	2.48587	0.000155046	0.000611812	12	NaN	SWISS-PROT:Q3MHN5	(Bos taurus) Vitamin D-binding protein precursor	NaN	24	-82.1484	0.178516	Nb	Hp	NaN	NaN	NaN
Nb / Hp	Q91ZW3	Q91ZW3	-0.670282	0.670282	0.000155017	0.000611812	12	Q91ZW3	Smarca5	SWI/SNF-related matrix-associated actin-dependent regulator of chromatin subfamily A member 5	SMCA5_MOUSE	52	-37.1616	0.628384	Nb	Hp	NaN	NaN	NaN
Nb / Control	Q64729	Q64729	-0.407383	0.407383	0.000156261	0.000615277	12	Q64729	Tgfbr1	TGF-beta receptor type-1	TGFR1_MOUSE	3	-24.601	0.75399	Nb	Control	NaN	NaN	NaN
Nb / Hp	Q99N92	Q99N92	-1.71189	1.71189	0.000156202	0.000615277	12	Q99N92	Mrpl27	Large ribosomal subunit protein bL27m	RM27_MOUSE	4	-69.474	0.30526	Nb	Hp	NaN	NaN	NaN
Nb / Hp	Q9DB43	Q9DB43	-1.48566	1.48566	0.00015666	0.000616185	12	Q9DB43	Zfpl1	Zinc finger protein-like 1	ZFPL1_MOUSE	3	-64.2914	0.357086	Nb	Hp	NaN	NaN	NaN
Nb / Hp	Q91VC9	Q91VC9	-1.30653	1.30653	0.000157107	0.000616886	12	Q91VC9	Ghitm	Growth hormone-inducible transmembrane protein	GHITM_MOUSE	5	-59.5708	0.404292	Nb	Hp	NaN	NaN	NaN
Nb / Control	Q9CWL8	Q9CWL8	1.15037	1.15037	0.000157176	0.000616886	12	Q9CWL8	Ctnnbl1	Beta-catenin-like protein 1	CTBL1_MOUSE	19	121.971	2.21971	Nb	Control	NaN	NaN	NaN
Nb / Hp	P35283	P35283	-1.04368	1.04368	0.000158416	0.00062048	12	P35283	Rab12	Ras-related protein Rab-12	RAB12_MOUSE	4	-51.4912	0.485088	Nb	Hp	NaN	NaN	NaN
Nb / Hp	Q9JMH6	Q9JMH6	2.79823	2.79823	0.000158431	0.00062048	12	Q9JMH6	Txnrd1	Thioredoxin reductase 1, cytoplasmic	TRXR1_MOUSE	15	595.586	6.95586	Nb	Hp	NaN	NaN	NaN
Nb / Hp	Q64442	Q64442	2.43327	2.43327	0.000158873	0.000620741	12	Q64442	Sord	Sorbitol dehydrogenase	DHSO_MOUSE	9	440.116	5.40116	Nb	Hp	NaN	NaN	NaN
Nb / Hp	Q9ESV0	Q9ESV0	-0.563312	0.563312	0.000159008	0.000620741	12	Q9ESV0	Ddx24	ATP-dependent RNA helicase DDX24	DDX24_MOUSE	37	-32.3253	0.676747	Nb	Hp	NaN	NaN	NaN
Nb / Hp	Q9QZH3	Q9QZH3	-1.38998	1.38998	0.00015872	0.000620741	12	Q9QZH3	Ppie	Peptidyl-prolyl cis-trans isomerase E	PPIE_MOUSE	2	-61.8431	0.381569	Nb	Hp	NaN	NaN	NaN
Nb / Hp	Q6ZQM8	Q6ZQM8	-0.861317	0.861317	0.000160411	0.000624948	12	Q6ZQM8	Ugt1a7	UDP-glucuronosyltransferase 1A7	UD17_MOUSE	19	-44.955	0.55045	Nb	Hp	NaN	NaN	NaN
Nb / Hp	Q8R3G1	Q8R3G1	-1.06226	1.06226	0.000160427	0.000624948	12	Q8R3G1	Ppp1r8	Nuclear inhibitor of protein phosphatase 1	PP1R8_MOUSE	4	-52.1119	0.478881	Nb	Hp	NaN	NaN	NaN
Hp / Control	O09117	O09117	0.839044	0.839044	0.000161103	0.000626245	12	O09117	Sypl1	Synaptophysin-like protein 1	SYPL1_MOUSE	2	78.8864	1.78886	Hp	Control	NaN	NaN	NaN
Nb / Hp	P61804	P61804	-0.61971	0.61971	0.000161013	0.000626245	12	P61804	Dad1	Dolichyl-diphosphooligosaccharide--protein glycosyltransferase subunit DAD1	DAD1_MOUSE	4	-34.9198	0.650802	Nb	Hp	NaN	NaN	NaN
Nb / Hp	Q91YE7	Q91YE7	-1.32135	1.32135	0.000161513	0.000627172	12	Q91YE7	Rbm5	RNA-binding protein 5	RBM5_MOUSE	13	-59.984	0.40016	Nb	Hp	NaN	NaN	NaN
Nb / Hp	Q9CQX4	Q9CQX4	-2.6084	2.6084	0.000161734	0.000627365	12	Q9CQX4	Pclaf	PCNA-associated factor	PAF15_MOUSE	3	-83.6019	0.163981	Nb	Hp	NaN	NaN	NaN
Nb / Hp	Q8VEE4	Q8VEE4	0.9869	0.9869	0.000162388	0.000629234	12	Q8VEE4	Rpa1	Replication protein A 70 kDa DNA-binding subunit	RFA1_MOUSE	20	98.1922	1.98192	Nb	Hp	NaN	NaN	NaN
Nb / Hp	P97329	P97329	-0.921404	0.921404	0.000162774	0.00063006	12	P97329	Kif20a	Kinesin-like protein KIF20A	KI20A_MOUSE	13	-47.2005	0.527995	Nb	Hp	NaN	NaN	NaN
Nb / Hp	Q2UVX4	Q2UVX4	-2.49542	2.49542	0.000163347	0.000631608	12	NaN	SWISS-PROT:Q2UVX4	(Bos taurus) Complement C3 precursor	NaN	63	-82.2661	0.177339	Nb	Hp	NaN	NaN	NaN
Nb / Hp	Q9DBR3	Q9DBR3	1.20956	1.20956	0.000163652	0.000632117	12	Q9DBR3	Armc8	Armadillo repeat-containing protein 8	ARMC8_MOUSE	4	131.267	2.31267	Nb	Hp	NaN	NaN	NaN
Nb / Hp	P01897	P01897	-1.23751	1.23751	0.000164351	0.000633335	12	P01897	H2-L	H-2 class I histocompatibility antigen, L-D alpha chain	HA1L_MOUSE	7	-57.5897	0.424103	Nb	Hp	NaN	NaN	NaN
Nb / Hp	Q8C854	Q8C854	-1.43787	1.43787	0.00016429	0.000633335	12	Q8C854	Myef2	Myelin expression factor 2	MYEF2_MOUSE	21	-63.0888	0.369112	Nb	Hp	NaN	NaN	NaN
Nb / Control	Q9QYC0	Q9QYC0	2.25182	2.25182	0.000164487	0.000633335	12	Q9QYC0	Add1	Alpha-adducin	ADDA_MOUSE	4	376.282	4.76282	Nb	Control	NaN	NaN	NaN
Nb / Control	Q9D8V0	Q9D8V0	-0.706236	0.706236	0.000165116	0.00063509	12	Q9D8V0	Hm13	Minor histocompatibility antigen H13	HM13_MOUSE	6	-38.7083	0.612917	Nb	Control	NaN	NaN	NaN
Nb / Hp	P02672	P02672	-0.675728	0.675728	0.000165522	0.00063598	12	NaN	SWISS-PROT:P02672	(Bos taurus) Fibrinogen alpha chain precursor	NaN	9	-37.3984	0.626016	Nb	Hp	NaN	NaN	NaN
Nb / Hp	Q3TUA9	Q3TUA9	-2.76828	2.76828	0.00016585	0.000636571	12	Q3TUA9	Pomk	Protein O-mannose kinase	SG196_MOUSE	2	-85.322	0.14678	Nb	Hp	NaN	NaN	NaN
Nb / Hp	P10404	P10404	-0.929587	0.929587	0.000166157	0.00063708	12	P10404	NaN	MLV-related proviral Env polyprotein	ENV1_MOUSE	17	-47.4991	0.525009	Nb	Hp	NaN	NaN	NaN
Nb / Hp	Q9Z1N2	Q9Z1N2	-0.779333	0.779333	0.000166613	0.000638161	12	Q9Z1N2	Orc1	Origin recognition complex subunit 1	ORC1_MOUSE	13	-41.7364	0.582636	Nb	Hp	NaN	NaN	NaN
Nb / Hp	Q9EP69	Q9EP69	-1.03468	1.03468	0.000166882	0.000638521	12	Q9EP69	Sacm1l	Phosphatidylinositol-3-phosphatase SAC1	SAC1_MOUSE	26	-51.1877	0.488123	Nb	Hp	NaN	NaN	NaN
Nb / Hp	Q78T54	Q78T54	-1.54775	1.54775	0.000167294	0.000638759	12	Q78T54	Vma21	Vacuolar ATPase assembly integral membrane protein Vma21	VMA21_MOUSE	2	-65.7957	0.342043	Nb	Hp	NaN	NaN	NaN
Nb / Hp	Q99KS2	Q99KS2	-1.69908	1.69908	0.000167231	0.000638759	12	Q99KS2	Ngrn	Neugrin	NGRN_MOUSE	10	-69.2018	0.307982	Nb	Hp	NaN	NaN	NaN
Nb / Control	P62259	P62259	1.75582	1.75582	0.000169208	0.000644047	12	P62259	Ywhae	14-3-3 protein epsilon	1433E_MOUSE	22	237.717	3.37717	Nb	Control	NaN	NaN	NaN
Nb / Hp	P62259	P62259	2.08057	2.08057	0.000168929	0.000644047	12	P62259	Ywhae	14-3-3 protein epsilon	1433E_MOUSE	22	322.973	4.22973	Nb	Hp	NaN	NaN	NaN
Nb / Hp	Q5XKN4	Q5XKN4	-1.17913	1.17913	0.00016915	0.000644047	12	Q5XKN4	Jagn1	Protein jagunal homolog 1	JAGN1_MOUSE	3	-55.8381	0.441619	Nb	Hp	NaN	NaN	NaN
Nb / Hp	Q8CIV2	Q8CIV2	-1.1133	1.1133	0.000169749	0.00064512	12	Q8CIV2	Tmem259	Membralin	MBRL_MOUSE	6	-53.7763	0.462237	Nb	Hp	NaN	NaN	NaN
Nb / Hp	Q9DCI9	Q9DCI9	-1.06358	1.06358	0.000169843	0.00064512	12	Q9DCI9	Mrpl32	Large ribosomal subunit protein bL32m	RM32_MOUSE	3	-52.1556	0.478444	Nb	Hp	NaN	NaN	NaN
Nb / Hp	Q8CCB4	Q8CCB4	1.37364	1.37364	0.000170304	0.000646199	12	Q8CCB4	Vps53	Vacuolar protein sorting-associated protein 53 homolog	VPS53_MOUSE	10	159.123	2.59123	Nb	Hp	NaN	NaN	NaN
Nb / Control	Q8K2B3	Q8K2B3	-0.932021	0.932021	0.000170694	0.000647009	12	Q8K2B3	Sdha	Succinate dehydrogenase [ubiquinone] flavoprotein subunit, mitochondrial	SDHA_MOUSE	30	-47.5876	0.524124	Nb	Control	NaN	NaN	NaN
Nb / Hp	Q9EQ80	Q9EQ80	1.83639	1.83639	0.000171038	0.000647639	12	Q9EQ80	Nif3l1	NIF3-like protein 1	NIF3L_MOUSE	12	257.117	3.57117	Nb	Hp	NaN	NaN	NaN
Nb / Control	Q8BWZ3	Q8BWZ3	1.57689	1.57689	0.000171672	0.000649368	12	Q8BWZ3	Naa25	N-alpha-acetyltransferase 25, NatB auxiliary subunit	NAA25_MOUSE	17	198.326	2.98326	Nb	Control	NaN	NaN	NaN
Nb / Hp	P18760	P18760	1.32102	1.32102	0.00017225	0.000650207	12	P18760	Cfl1	Cofilin-1	COF1_MOUSE	22	149.843	2.49843	Nb	Hp	NaN	NaN	NaN
Nb / Hp	Q3THG9	Q3THG9	1.98615	1.98615	0.000172248	0.000650207	12	Q3THG9	Aarsd1	Alanyl-tRNA editing protein Aarsd1	AASD1_MOUSE	7	296.18	3.9618	Nb	Hp	NaN	NaN	NaN
Nb / Hp	Q9D483	Q9D483	1.6732	1.6732	0.000172588	0.000650812	12	Q9D483	Polr3c	DNA-directed RNA polymerase III subunit RPC3	RPC3_MOUSE	7	218.922	3.18922	Nb	Hp	NaN	NaN	NaN
Nb / Hp	O88544	O88544	1.70548	1.70548	0.000173239	0.000651721	12	O88544	Cops4	COP9 signalosome complex subunit 4	CSN4_MOUSE	17	226.137	3.26137	Nb	Hp	NaN	NaN	NaN
Hp / Control	Q8VBT9	Q8VBT9	0.732297	0.732297	0.00017329	0.000651721	12	Q8VBT9	Aspscr1	Tether containing UBX domain for GLUT4	ASPC1_MOUSE	3	66.1283	1.66128	Hp	Control	NaN	NaN	NaN
Nb / Hp	Q9CZX7	Q9CZX7	-1.16067	1.16067	0.000173364	0.000651721	12	Q9CZX7	Pip4p2	Type 2 phosphatidylinositol 4,5-bisphosphate 4-phosphatase	PP4P2_MOUSE	5	-55.2695	0.447305	Nb	Hp	NaN	NaN	NaN
Hp / Control	O35737	O35737	1.50248	1.50248	0.000173701	0.000652315	12	O35737	Hnrnph1	Heterogeneous nuclear ribonucleoprotein H	HNRH1_MOUSE	17	183.33	2.8333	Hp	Control	NaN	NaN	NaN
Nb / Hp	O09131	O09131	1.73883	1.73883	0.000174166	0.000653389	12	O09131	Gsto1	Glutathione S-transferase omega-1	GSTO1_MOUSE	10	233.765	3.33765	Nb	Hp	NaN	NaN	NaN
Nb / Hp	P43275	P43275	-0.887473	0.887473	0.000174721	0.000654799	12	P43275	H1-1	Histone H1.1	H11_MOUSE	11	-45.944	0.54056	Nb	Hp	NaN	NaN	NaN
Nb / Hp	G3X8U3	G3X8U3	1.89717	1.89717	0.000175118	0.000654946	12	G3X8U3	QNG1	Queuosine 5'-phosphate N-glycosylase/hydrolase	QNG1_MOUSE	7	272.482	3.72482	Nb	Hp	NaN	NaN	NaN
Nb / Control	Q9CQ79	Q9CQ79	1.77262	1.77262	0.000175095	0.000654946	12	Q9CQ79	Txndc9	Thioredoxin domain-containing protein 9	TXND9_MOUSE	4	241.673	3.41673	Nb	Control	NaN	NaN	NaN
Nb / Hp	Q9CZ30	Q9CZ30	1.754	1.754	0.000175601	0.000656079	12	Q9CZ30	Ola1	Obg-like ATPase 1	OLA1_MOUSE	16	237.293	3.37293	Nb	Hp	NaN	NaN	NaN
Nb / Hp	Q8BTY8	Q8BTY8	-1.11251	1.11251	0.000176053	0.000657098	12	Q8BTY8	Scfd2	Sec1 family domain-containing protein 2	SCFD2_MOUSE	10	-53.751	0.46249	Nb	Hp	NaN	NaN	NaN
Nb / Hp	P80313	P80313	1.60105	1.60105	0.000176876	0.000659495	12	P80313	Cct7	T-complex protein 1 subunit eta	TCPH_MOUSE	35	203.365	3.03365	Nb	Hp	NaN	NaN	NaN
Nb / Control	Q91YT0	Q91YT0	-1.00547	1.00547	0.00017722	0.000660103	12	Q91YT0	Ndufv1	NADH dehydrogenase [ubiquinone] flavoprotein 1, mitochondrial	NDUV1_MOUSE	20	-50.1894	0.498106	Nb	Control	NaN	NaN	NaN
Nb / Control	P42932	P42932	1.70149	1.70149	0.000178275	0.000663358	12	P42932	Cct8	T-complex protein 1 subunit theta	TCPQ_MOUSE	48	225.238	3.25238	Nb	Control	NaN	NaN	NaN
Nb / Control	Q3MHN5	Q3MHN5	-0.627493	0.627493	0.000178488	0.000663475	12	NaN	SWISS-PROT:Q3MHN5	(Bos taurus) Vitamin D-binding protein precursor	NaN	24	-35.27	0.6473	Nb	Control	NaN	NaN	NaN
Nb / Hp	Q5SS80	Q5SS80	-0.892539	0.892539	0.000179145	0.00066524	12	Q5SS80	Dhrs13	Dehydrogenase/reductase SDR family member 13	DHR13_MOUSE	9	-46.1335	0.538665	Nb	Hp	NaN	NaN	NaN
Nb / Hp	Q80WG5	Q80WG5	-1.09009	1.09009	0.000179887	0.000667073	12	Q80WG5	Lrrc8a	Volume-regulated anion channel subunit LRRC8A	LRC8A_MOUSE	9	-53.0267	0.469733	Nb	Hp	NaN	NaN	NaN
Nb / Control	Q8C0I1	Q8C0I1	-0.722627	0.722627	0.000180004	0.000667073	12	Q8C0I1	Agps	Alkyldihydroxyacetonephosphate synthase, peroxisomal	ADAS_MOUSE	31	-39.4007	0.605993	Nb	Control	NaN	NaN	NaN
Nb / Hp	P68037	P68037	1.07522	1.07522	0.000182356	0.000674311	12	P68037	Ube2l3	Ubiquitin-conjugating enzyme E2 L3	UB2L3_MOUSE	6	110.705	2.10705	Nb	Hp	NaN	NaN	NaN
Nb / Hp	Q62448	Q62448	1.21822	1.21822	0.000182511	0.000674311	12	Q62448	Eif4g2	Eukaryotic translation initiation factor 4 gamma 2	IF4G2_MOUSE	33	132.66	2.3266	Nb	Hp	NaN	NaN	NaN
Nb / Hp	Q9QX47	Q9QX47	-0.367731	0.367731	0.000182248	0.000674311	12	Q9QX47	Son	Protein SON	SON_MOUSE	28	-22.5	0.775	Nb	Hp	NaN	NaN	NaN
Nb / Hp	P35293	P35293	-0.467803	0.467803	0.000182891	0.000674435	12	P35293	Rab18	Ras-related protein Rab-18	RAB18_MOUSE	8	-27.6935	0.723065	Nb	Hp	NaN	NaN	NaN
Nb / Control	Q61176	Q61176	-1.14009	1.14009	0.000182913	0.000674435	12	Q61176	Arg1	Arginase-1	ARGI1_MOUSE	3	-54.6268	0.453732	Nb	Control	NaN	NaN	NaN
Nb / Hp	P62858	P62858	1.24859	1.24859	0.000183405	0.000675567	12	P62858	Rps28	Small ribosomal subunit protein eS28	RS28_MOUSE	5	137.609	2.37609	Nb	Hp	NaN	NaN	NaN
Hp / Control	Q02105	Q02105	1.27692	1.27692	0.000183814	0.000675712	12	Q02105	C1qc	Complement C1q subcomponent subunit C	C1QC_MOUSE	6	142.321	2.42321	Hp	Control	NaN	NaN	NaN
Nb / Hp	Q9QYL7	Q9QYL7	-0.666404	0.666404	0.000183691	0.000675712	12	Q9QYL7	Abt1	Activator of basal transcription 1	ABT1_MOUSE	8	-36.9925	0.630075	Nb	Hp	NaN	NaN	NaN
Nb / Hp	P47802	P47802	-0.943856	0.943856	0.000184575	0.000677827	12	P47802	Mtx1	Metaxin-1	MTX1_MOUSE	14	-48.0159	0.519841	Nb	Hp	NaN	NaN	NaN
Nb / Hp	O08912	O08912	-1.78602	1.78602	0.000184817	0.000678034	12	O08912	Galnt1	Polypeptide N-acetylgalactosaminyltransferase 1	GALT1_MOUSE	7	-71.003	0.28997	Nb	Hp	NaN	NaN	NaN
Nb / Hp	P63073	P63073	2.04032	2.04032	0.000185098	0.000678384	12	P63073	Eif4e	Eukaryotic translation initiation factor 4E	IF4E_MOUSE	6	311.336	4.11336	Nb	Hp	NaN	NaN	NaN
Nb / Hp	P42932	P42932	1.94908	1.94908	0.00018606	0.000679923	12	P42932	Cct8	T-complex protein 1 subunit theta	TCPQ_MOUSE	48	286.127	3.86127	Nb	Hp	NaN	NaN	NaN
Nb / Control	P63073	P63073	1.64592	1.64592	0.000185807	0.000679923	12	P63073	Eif4e	Eukaryotic translation initiation factor 4E	IF4E_MOUSE	6	212.948	3.12948	Nb	Control	NaN	NaN	NaN
Nb / Control	Q3TVP5	Q3TVP5	-0.51316	0.51316	0.000186113	0.000679923	12	Q3TVP5	Otulinl	Inactive ubiquitin thioesterase OTULINL	OTULL_MOUSE	6	-29.9314	0.700686	Nb	Control	NaN	NaN	NaN
Nb / Hp	Q9QYI4	Q9QYI4	-1.03566	1.03566	0.000186262	0.000679923	12	Q9QYI4	Dnajb12	DnaJ homolog subfamily B member 12	DJB12_MOUSE	15	-51.2208	0.487792	Nb	Hp	NaN	NaN	NaN
Nb / Control	P63158	P63158	1.78555	1.78555	0.000187086	0.000681162	12	P63158	Hmgb1	High mobility group protein B1	HMGB1_MOUSE	15	244.749	3.44749	Nb	Control	NaN	NaN	NaN
Nb / Hp	P97496	P97496	-1.40696	1.40696	0.000187052	0.000681162	12	P97496	Smarcc1	SWI/SNF complex subunit SMARCC1	SMRC1_MOUSE	26	-62.2894	0.377106	Nb	Hp	NaN	NaN	NaN
Nb / Hp	Q8R2N0	Q8R2N0	-0.819336	0.819336	0.000187161	0.000681162	12	Q8R2N0	Ccdc59	Thyroid transcription factor 1-associated protein 26	TAP26_MOUSE	2	-43.3297	0.566703	Nb	Hp	NaN	NaN	NaN
Nb / Hp	Q9D0L4	Q9D0L4	-0.916497	0.916497	0.000187462	0.000681578	12	Q9D0L4	Adck1	AarF domain-containing protein kinase 1	ADCK1_MOUSE	9	-47.0206	0.529794	Nb	Hp	NaN	NaN	NaN
Nb / Hp	Q99J56	Q99J56	-1.30732	1.30732	0.000188112	0.000682584	12	Q99J56	Derl1	Derlin-1	DERL1_MOUSE	6	-59.5928	0.404072	Nb	Hp	NaN	NaN	NaN
Nb / Control	Q9D6U8	Q9D6U8	-0.64481	0.64481	0.000187977	0.000682584	12	Q9D6U8	Fam162a	Protein FAM162A	F162A_MOUSE	7	-36.0423	0.639577	Nb	Control	NaN	NaN	NaN
Nb / Hp	Q922V4	Q922V4	-0.924763	0.924763	0.000188505	0.000682654	12	Q922V4	Plrg1	Pleiotropic regulator 1	PLRG1_MOUSE	17	-47.3233	0.526767	Nb	Hp	NaN	NaN	NaN
Nb / Hp	Q9D7J4	Q9D7J4	-1.45267	1.45267	0.000188381	0.000682654	12	Q9D7J4	Cox20	Cytochrome c oxidase assembly protein COX20, mitochondrial	COX20_MOUSE	4	-63.4657	0.365343	Nb	Hp	NaN	NaN	NaN
Nb / Hp	P62702	P62702	0.997923	0.997923	0.000188709	0.000682715	12	P62702	Rps4x	Small ribosomal subunit protein eS4	RS4X_MOUSE	32	99.7123	1.99712	Nb	Hp	NaN	NaN	NaN
Nb / Hp	Q01965	Q01965	-0.800791	0.800791	0.000189503	0.000684097	12	Q01965	Ly9	T-lymphocyte surface antigen Ly-9	LY9_MOUSE	7	-42.5966	0.574034	Nb	Hp	NaN	NaN	NaN
Nb / Hp	Q9CR13	Q9CR13	-1.27373	1.27373	0.000189653	0.000684097	12	Q9CR13	Fmc1	Protein FMC1 homolog	FMC1_MOUSE	2	-58.641	0.41359	Nb	Hp	NaN	NaN	NaN
Nb / Control	Q9DB96	Q9DB96	-0.972166	0.972166	0.000189583	0.000684097	12	Q9DB96	Ngdn	Neuroguidin	NGDN_MOUSE	7	-49.026	0.50974	Nb	Control	NaN	NaN	NaN
Nb / Hp	Q01320	Q01320	-0.41456	0.41456	0.00019003	0.000684782	12	Q01320	Top2a	DNA topoisomerase 2-alpha	TOP2A_MOUSE	74	-24.9752	0.750248	Nb	Hp	NaN	NaN	NaN
Nb / Control	P18760	P18760	1.1136	1.1136	0.000191567	0.00068964	12	P18760	Cfl1	Cofilin-1	COF1_MOUSE	22	116.384	2.16384	Nb	Control	NaN	NaN	NaN
Nb / Hp	O70493	O70493	1.47211	1.47211	0.000192514	0.000691689	12	O70493	Snx12	Sorting nexin-12	SNX12_MOUSE	3	177.428	2.77428	Nb	Hp	NaN	NaN	NaN
Nb / Hp	Q6GQT9	Q6GQT9	-1.04183	1.04183	0.000192497	0.000691689	12	Q6GQT9	Nomo1	BOS complex subunit NOMO1	NOMO1_MOUSE	43	-51.4289	0.485711	Nb	Hp	NaN	NaN	NaN
Nb / Hp	O88384	O88384	-1.29805	1.29805	0.000193347	0.000693318	12	O88384	Vti1b	Vesicle transport through interaction with t-SNAREs homolog 1B	VTI1B_MOUSE	9	-59.3323	0.406677	Nb	Hp	NaN	NaN	NaN
Nb / Hp	Q8BMG7	Q8BMG7	0.74264	0.74264	0.000193187	0.000693318	12	Q8BMG7	Rab3gap2	Rab3 GTPase-activating protein non-catalytic subunit	RBGPR_MOUSE	23	67.3235	1.67323	Nb	Hp	NaN	NaN	NaN
Nb / Hp	Q8K0C4	Q8K0C4	-1.31403	1.31403	0.000193989	0.000694936	12	Q8K0C4	Cyp51a1	Lanosterol 14-alpha demethylase	CP51A_MOUSE	24	-59.7803	0.402197	Nb	Hp	NaN	NaN	NaN
Nb / Hp	Q8BWZ3	Q8BWZ3	2.15362	2.15362	0.000194698	0.000696793	12	Q8BWZ3	Naa25	N-alpha-acetyltransferase 25, NatB auxiliary subunit	NAA25_MOUSE	17	344.943	4.44943	Nb	Hp	NaN	NaN	NaN
Nb / Hp	Q00612	Q00612	1.85437	1.85437	0.000195643	0.000699491	12	Q00612	G6pdx	Glucose-6-phosphate 1-dehydrogenase X	G6PD1_MOUSE	32	261.595	3.61595	Nb	Hp	NaN	NaN	NaN
Nb / Hp	Q9QWT9	Q9QWT9	-0.392156	0.392156	0.000197496	0.000705427	12	Q9QWT9	Kifc1	Kinesin-like protein KIFC1	KIFC1_MOUSE	11	-23.801	0.76199	Nb	Hp	NaN	NaN	NaN
Nb / Hp	P43247	P43247	1.27821	1.27821	0.000198765	0.000707881	12	P43247	Msh2	DNA mismatch repair protein Msh2	MSH2_MOUSE	19	142.539	2.42539	Nb	Hp	NaN	NaN	NaN
Nb / Hp	Q5DW34	Q5DW34	-0.818663	0.818663	0.000198654	0.000707881	12	Q5DW34	Ehmt1	Histone-lysine N-methyltransferase EHMT1	EHMT1_MOUSE	7	-43.3033	0.566967	Nb	Hp	NaN	NaN	NaN
Nb / Control	Q9DCN2	Q9DCN2	-0.872541	0.872541	0.00019854	0.000707881	12	Q9DCN2	Cyb5r3	NADH-cytochrome b5 reductase 3	NB5R3_MOUSE	19	-45.3816	0.546184	Nb	Control	NaN	NaN	NaN
Nb / Hp	E9Q414	E9Q414	-1.18798	1.18798	0.000199156	0.000708585	12	E9Q414	Apob	Apolipoprotein B-100	APOB_MOUSE	2	-56.1083	0.438917	Nb	Hp	NaN	NaN	NaN
Nb / Hp	P47758	P47758	-0.878134	0.878134	0.000199692	0.0007098	12	P47758	Srprb	Signal recognition particle receptor subunit beta	SRPRB_MOUSE	21	-45.5929	0.544071	Nb	Hp	NaN	NaN	NaN
Nb / Hp	P62270	P62270	0.642954	0.642954	0.000199908	0.000709876	12	P62270	Rps18	Small ribosomal subunit protein uS13	RS18_MOUSE	17	56.1523	1.56152	Nb	Hp	NaN	NaN	NaN
Nb / Hp	Q9D8P4	Q9D8P4	-1.08249	1.08249	0.00020052	0.00071136	12	Q9D8P4	Mrpl17	Large ribosomal subunit protein bL17m	RM17_MOUSE	4	-52.7788	0.472212	Nb	Hp	NaN	NaN	NaN
Nb / Hp	P14685	P14685	1.38033	1.38033	0.000200906	0.000711496	12	P14685	Psmd3	26S proteasome non-ATPase regulatory subunit 3	PSMD3_MOUSE	26	160.327	2.60327	Nb	Hp	NaN	NaN	NaN
Nb / Hp	P53810	P53810	1.34643	1.34643	0.000200948	0.000711496	12	P53810	Pitpna	Phosphatidylinositol transfer protein alpha isoform	PIPNA_MOUSE	7	154.281	2.54281	Nb	Hp	NaN	NaN	NaN
Nb / Hp	Q8BXV2	Q8BXV2	-0.919117	0.919117	0.000203445	0.00071964	12	Q8BXV2	Bri3bp	BRI3-binding protein	BRI3B_MOUSE	6	-47.1168	0.528832	Nb	Hp	NaN	NaN	NaN
Nb / Hp	Q61033	Q61033	-1.31046	1.31046	0.000204485	0.000722619	12	Q61033	Tmpo	Lamina-associated polypeptide 2, isoforms alpha/zeta	LAP2A_MOUSE	30	-59.6807	0.403193	Nb	Hp	NaN	NaN	NaN
Nb / Control	Q99LS3	Q99LS3	1.59297	1.59297	0.000205016	0.000723794	12	Q99LS3	Psph	Phosphoserine phosphatase	SERB_MOUSE	9	201.67	3.0167	Nb	Control	NaN	NaN	NaN
Nb / Hp	P97452	P97452	-0.732206	0.732206	0.000205548	0.000724972	12	P97452	Bop1	Ribosome biogenesis protein BOP1	BOP1_MOUSE	25	-39.8017	0.601983	Nb	Hp	NaN	NaN	NaN
Nb / Hp	Q9R061	Q9R061	1.74414	1.74414	0.00020577	0.000725056	12	Q9R061	Nubp2	Cytosolic Fe-S cluster assembly factor NUBP2	NUBP2_MOUSE	5	234.995	3.34995	Nb	Hp	NaN	NaN	NaN
Nb / Hp	Q569Z6	Q569Z6	-1.49225	1.49225	0.000206003	0.000725178	12	Q569Z6	Thrap3	Thyroid hormone receptor-associated protein 3	TR150_MOUSE	18	-64.4542	0.355458	Nb	Hp	NaN	NaN	NaN
Nb / Control	P84078	P84078	1.62693	1.62693	0.0002066	0.000726579	12	P84078	Arf1	ADP-ribosylation factor 1	ARF1_MOUSE	14	208.856	3.08856	Nb	Control	NaN	NaN	NaN
Nb / Control	P32067	P32067	1.00932	1.00932	0.000206897	0.000726925	12	P32067	Ssb	Lupus La protein homolog	LA_MOUSE	29	101.296	2.01296	Nb	Control	NaN	NaN	NaN
Nb / Hp	Q9D0F9	Q9D0F9	2.49895	2.49895	0.000207741	0.000729188	12	Q9D0F9	Pgm1	Phosphoglucomutase-1	PGM1_MOUSE	18	465.272	5.65272	Nb	Hp	NaN	NaN	NaN
Nb / Hp	P12763	P12763	-2.64813	2.64813	0.000208354	0.00073064	12	NaN	SWISS-PROT:P12763	(Bos taurus) Alpha-2-HS-glycoprotein precursor	NaN	16	-84.0473	0.159527	Nb	Hp	NaN	NaN	NaN
Nb / Hp	P21107	P21107	2.08099	2.08099	0.000210091	0.000736025	12	P21107	Tpm3	Tropomyosin alpha-3 chain	TPM3_MOUSE	23	323.098	4.23098	Nb	Hp	NaN	NaN	NaN
Nb / Control	Q80ZW2	Q80ZW2	-1.18342	1.18342	0.000211829	0.0007414	12	Q80ZW2	Them6	Protein THEM6	THEM6_MOUSE	6	-55.9693	0.440307	Nb	Control	NaN	NaN	NaN
Nb / Hp	Q0GNC1	Q0GNC1	-0.422228	0.422228	0.000213053	0.000743144	12	Q0GNC1	Inf2	Inverted formin-2	INF2_MOUSE	22	-25.3729	0.746271	Nb	Hp	NaN	NaN	NaN
Nb / Control	Q8BUV3	Q8BUV3	1.50189	1.50189	0.00021314	0.000743144	12	Q8BUV3	Gphn	Gephyrin	GEPH_MOUSE	15	183.213	2.83213	Nb	Control	NaN	NaN	NaN
Nb / Hp	Q91YP3	Q91YP3	1.66427	1.66427	0.000212651	0.000743144	12	Q91YP3	Dera	Deoxyribose-phosphate aldolase	DEOC_MOUSE	11	216.953	3.16953	Nb	Hp	NaN	NaN	NaN
Nb / Hp	Q9Z0V7	Q9Z0V7	-1.33107	1.33107	0.000212989	0.000743144	12	Q9Z0V7	Timm17b	Mitochondrial import inner membrane translocase subunit Tim17-B	TI17B_MOUSE	4	-60.2526	0.397474	Nb	Hp	NaN	NaN	NaN
Hp / Control	P00978	P00978	1.37777	1.37777	0.00021355	0.000743863	12	NaN	SWISS-PROT:P00978	(Bos taurus) AMBP protein precursor	NaN	7	159.866	2.59866	Hp	Control	NaN	NaN	NaN
Nb / Hp	Q8BMD8	Q8BMD8	-1.18656	1.18656	0.000214784	0.000746736	12	Q8BMD8	Slc25a24	Mitochondrial adenyl nucleotide antiporter SLC25A24	SCMC1_MOUSE	19	-56.065	0.43935	Nb	Hp	NaN	NaN	NaN
Nb / Hp	Q91VE0	Q91VE0	-1.26494	1.26494	0.000214643	0.000746736	12	Q91VE0	Slc27a4	Long-chain fatty acid transport protein 4	S27A4_MOUSE	14	-58.3884	0.416116	Nb	Hp	NaN	NaN	NaN
Hp / Control	P18572	P18572	0.871824	0.871824	0.000215404	0.000747469	12	P18572	Bsg	Basigin	BASI_MOUSE	11	82.9975	1.82997	Hp	Control	NaN	NaN	NaN
Nb / Hp	Q60749	Q60749	-0.737315	0.737315	0.000215331	0.000747469	12	Q60749	Khdrbs1	KH domain-containing, RNA-binding, signal transduction-associated protein 1	KHDR1_MOUSE	13	-40.0145	0.599855	Nb	Hp	NaN	NaN	NaN
Nb / Control	O70503	O70503	-0.726701	0.726701	0.000215762	0.000748001	12	O70503	Hsd17b12	Very-long-chain 3-oxoacyl-CoA reductase	DHB12_MOUSE	22	-39.5716	0.604284	Nb	Control	NaN	NaN	NaN
Nb / Hp	O35604	O35604	-1.46758	1.46758	0.00021814	0.000754814	12	O35604	Npc1	NPC intracellular cholesterol transporter 1	NPC1_MOUSE	4	-63.8411	0.361589	Nb	Hp	NaN	NaN	NaN
Nb / Hp	Q01768	Q01768	2.33775	2.33775	0.000218072	0.000754814	12	Q01768	Nme2	Nucleoside diphosphate kinase B	NDKB_MOUSE	12	405.514	5.05514	Nb	Hp	NaN	NaN	NaN
Nb / Control	E9Q5C9	E9Q5C9	-1.74949	1.74949	0.000219699	0.000756613	12	E9Q5C9	Nolc1	Nucleolar and coiled-body phosphoprotein 1	NOLC1_MOUSE	25	-70.2592	0.297408	Nb	Control	NaN	NaN	NaN
Nb / Hp	P24452	P24452	1.26903	1.26903	0.000219261	0.000756613	12	P24452	Capg	Macrophage-capping protein	CAPG_MOUSE	16	140.999	2.40999	Nb	Hp	NaN	NaN	NaN
Nb / Hp	Q3TVI8	Q3TVI8	-2.1341	2.1341	0.000219762	0.000756613	12	Q3TVI8	Pbxip1	Pre-B-cell leukemia transcription factor-interacting protein 1	PBIP1_MOUSE	19	-77.2191	0.227809	Nb	Hp	NaN	NaN	NaN
Nb / Hp	Q8K363	Q8K363	-0.66236	0.66236	0.000219497	0.000756613	12	Q8K363	Ddx18	ATP-dependent RNA helicase DDX18	DDX18_MOUSE	28	-36.8156	0.631844	Nb	Hp	NaN	NaN	NaN
Nb / Hp	Q923W1	Q923W1	1.11583	1.11583	0.000219902	0.000756613	12	Q923W1	Tgs1	Trimethylguanosine synthase	TGS1_MOUSE	2	116.719	2.16719	Nb	Hp	NaN	NaN	NaN
Nb / Hp	Q9WTQ8	Q9WTQ8	-1.0169	1.0169	0.000219068	0.000756613	12	Q9WTQ8	Timm23	Mitochondrial import inner membrane translocase subunit Tim23	TIM23_MOUSE	6	-50.5824	0.494176	Nb	Hp	NaN	NaN	NaN
Nb / Control	Q8R5M8	Q8R5M8	-0.896713	0.896713	0.000220548	0.000758026	12	Q8R5M8	Cadm1	Cell adhesion molecule 1	CADM1_MOUSE	7	-46.2891	0.537109	Nb	Control	NaN	NaN	NaN
Nb / Hp	Q99LY9	Q99LY9	-2.16746	2.16746	0.000220728	0.000758026	12	Q99LY9	Ndufs5	NADH dehydrogenase [ubiquinone] iron-sulfur protein 5	NDUS5_MOUSE	8	-77.7397	0.222603	Nb	Hp	NaN	NaN	NaN
Nb / Hp	Q60866	Q60866	2.66143	2.66143	0.000221965	0.000761559	12	Q60866	Pter	Phosphotriesterase-related protein	PTER_MOUSE	5	532.658	6.32658	Nb	Hp	NaN	NaN	NaN
Nb / Control	Q9Z2B5	Q9Z2B5	-0.87895	0.87895	0.000224013	0.000767864	12	Q9Z2B5	Eif2ak3	Eukaryotic translation initiation factor 2-alpha kinase 3	E2AK3_MOUSE	4	-45.6237	0.543763	Nb	Control	NaN	NaN	NaN
Hp / Control	Q8BZR9	Q8BZR9	1.6824	1.6824	0.000224593	0.000768773	12	Q8BZR9	Ncbp3	Nuclear cap-binding protein subunit 3	NCBP3_MOUSE	7	220.961	3.20961	Hp	Control	NaN	NaN	NaN
Nb / Hp	Q9ESJ0	Q9ESJ0	1.55254	1.55254	0.000224699	0.000768773	12	Q9ESJ0	Xpo4	Exportin-4	XPO4_MOUSE	7	193.333	2.93333	Nb	Hp	NaN	NaN	NaN
Nb / Hp	Q8R138	Q8R138	-3.01412	3.01412	0.000225037	0.000769208	12	Q8R138	Tmem119	Transmembrane protein 119	TM119_MOUSE	2	-87.6217	0.123783	Nb	Hp	NaN	NaN	NaN
Hp / Control	Q9Z0H4	Q9Z0H4	2.12	2.12	0.000225592	0.000770387	12	Q9Z0H4	Celf2	CUGBP Elav-like family member 2	CELF2_MOUSE	16	334.695	4.34695	Hp	Control	NaN	NaN	NaN
Nb / Control	Q62087	Q62087	-0.83021	0.83021	0.000225996	0.000771034	12	Q62087	Pon3	Serum paraoxonase/lactonase 3	PON3_MOUSE	11	-43.7553	0.562447	Nb	Control	NaN	NaN	NaN
Nb / Control	Q9CPY1	Q9CPY1	1.31633	1.31633	0.000226415	0.000771034	12	Q9CPY1	Mrpl51	Large ribosomal subunit protein mL51	RM51_MOUSE	3	149.032	2.49032	Nb	Control	NaN	NaN	NaN
Nb / Hp	Q9JIF0	Q9JIF0	1.6228	1.6228	0.000226268	0.000771034	12	Q9JIF0	Prmt1	Protein arginine N-methyltransferase 1	ANM1_MOUSE	15	207.971	3.07971	Nb	Hp	NaN	NaN	NaN
Hp / Control	Q99020	Q99020	1.88713	1.88713	0.00022761	0.000774383	12	Q99020	Hnrnpab	Heterogeneous nuclear ribonucleoprotein A/B	ROAA_MOUSE	14	269.897	3.69897	Hp	Control	NaN	NaN	NaN
Nb / Hp	Q5SYH2	Q5SYH2	-1.52796	1.52796	0.000228361	0.000776214	12	Q5SYH2	Tmem199	Transmembrane protein 199	TM199_MOUSE	7	-65.3232	0.346768	Nb	Hp	NaN	NaN	NaN
Nb / Hp	Q8VHN8	Q8VHN8	2.2854	2.2854	0.000228806	0.000777004	12	Q8VHN8	Nudt16l1	Tudor-interacting repair regulator protein	TIRR_MOUSE	6	387.5	4.875	Nb	Hp	NaN	NaN	NaN
Nb / Hp	Q6A4J8	Q6A4J8	0.713435	0.713435	0.000229691	0.000777203	12	Q6A4J8	Usp7	Ubiquitin carboxyl-terminal hydrolase 7	UBP7_MOUSE	22	63.9703	1.6397	Nb	Hp	NaN	NaN	NaN
Nb / Hp	Q8CFI5	Q8CFI5	-0.973484	0.973484	0.00022969	0.000777203	12	Q8CFI5	Pars2	Probable proline--tRNA ligase, mitochondrial	SYPM_MOUSE	2	-49.0725	0.509275	Nb	Hp	NaN	NaN	NaN
Nb / Hp	Q8R366	Q8R366	-0.784726	0.784726	0.000229432	0.000777203	12	Q8R366	Igsf8	Immunoglobulin superfamily member 8	IGSF8_MOUSE	12	-41.9538	0.580462	Nb	Hp	NaN	NaN	NaN
Nb / Hp	Q99LB2	Q99LB2	-0.576781	0.576781	0.000229759	0.000777203	12	Q99LB2	Dhrs4	Dehydrogenase/reductase SDR family member 4	DHRS4_MOUSE	13	-32.9542	0.670458	Nb	Hp	NaN	NaN	NaN
Nb / Hp	Q9JI46	Q9JI46	2.81545	2.81545	0.000229928	0.000777203	12	Q9JI46	Nudt3	Diphosphoinositol polyphosphate phosphohydrolase 1	NUDT3_MOUSE	2	603.937	7.03937	Nb	Hp	NaN	NaN	NaN
Nb / Hp	Q922Q8	Q922Q8	-0.87	0.87	0.000230291	0.000777712	12	Q922Q8	Lrrc59	Leucine-rich repeat-containing protein 59	LRC59_MOUSE	19	-45.2853	0.547147	Nb	Hp	NaN	NaN	NaN
Nb / Hp	Q60715	Q60715	-0.982935	0.982935	0.000231211	0.000780098	12	Q60715	P4ha1	Prolyl 4-hydroxylase subunit alpha-1	P4HA1_MOUSE	18	-49.405	0.50595	Nb	Hp	NaN	NaN	NaN
Nb / Hp	Q3TSG4	Q3TSG4	1.43744	1.43744	0.000231647	0.000780185	12	Q3TSG4	Alkbh5	RNA demethylase ALKBH5	ALKB5_MOUSE	3	170.84	2.7084	Nb	Hp	NaN	NaN	NaN
Nb / Hp	Q8BGR2	Q8BGR2	-0.533009	0.533009	0.000231664	0.000780185	12	Q8BGR2	Lrrc8d	Volume-regulated anion channel subunit LRRC8D	LRC8D_MOUSE	6	-30.8888	0.691112	Nb	Hp	NaN	NaN	NaN
Nb / Hp	Q8BG17	Q8BG17	-1.20777	1.20777	0.000232124	0.000781014	12	Q8BG17	Nol12	Nucleolar protein 12	NOL12_MOUSE	3	-56.7062	0.432938	Nb	Hp	NaN	NaN	NaN
Nb / Hp	P28352	P28352	2.20922	2.20922	0.000232807	0.000782514	12	P28352	Apex1	DNA repair nuclease/redox regulator APEX1	APEX1_MOUSE	17	362.424	4.62424	Nb	Hp	NaN	NaN	NaN
Nb / Control	Q61733	Q61733	-1.23011	1.23011	0.000232998	0.000782514	12	Q61733	Mrps31	Small ribosomal subunit protein mS31	RT31_MOUSE	8	-57.3714	0.426286	Nb	Control	NaN	NaN	NaN
Nb / Hp	S4R2K0	S4R2K0	-0.98101	0.98101	0.000234822	0.000787914	12	S4R2K0	Pdf	Peptide deformylase, mitochondrial	DEFM_MOUSE	5	-49.3375	0.506625	Nb	Hp	NaN	NaN	NaN
Nb / Control	P06151	P06151	1.50908	1.50908	0.000235384	0.000788353	12	P06151	Ldha	L-lactate dehydrogenase A chain	LDHA_MOUSE	26	184.628	2.84628	Nb	Control	NaN	NaN	NaN
Nb / Control	Q3UW53	Q3UW53	1.65171	1.65171	0.000235309	0.000788353	12	Q3UW53	Niban1	Protein Niban 1	NIBA1_MOUSE	6	214.207	3.14207	Nb	Control	NaN	NaN	NaN
Nb / Control	P63038	P63038	-1.0084	1.0084	0.000235985	0.000789643	12	P63038	Hspd1	60 kDa heat shock protein, mitochondrial	CH60_MOUSE	67	-50.2902	0.497098	Nb	Control	NaN	NaN	NaN
Nb / Hp	P08905	P08905	1.0538	1.0538	0.00023718	0.000790745	12	P08905	Lyz2	Lysozyme C-2	LYZ2_MOUSE	8	107.6	2.076	Nb	Hp	NaN	NaN	NaN
Nb / Control	P19258	P19258	-0.808859	0.808859	0.000237172	0.000790745	12	P19258	Mpv17	Protein Mpv17	MPV17_MOUSE	2	-42.9167	0.570833	Nb	Control	NaN	NaN	NaN
Nb / Control	P62897	P62897	-0.660853	0.660853	0.000236542	0.000790745	12	P62897	Cycs	Cytochrome c, somatic	CYC_MOUSE	12	-36.7496	0.632504	Nb	Control	NaN	NaN	NaN
Nb / Hp	Q9CXE7	Q9CXE7	-1.61716	1.61716	0.000237153	0.000790745	12	Q9CXE7	Tmed5	Transmembrane emp24 domain-containing protein 5	TMED5_MOUSE	6	-67.4024	0.325976	Nb	Hp	NaN	NaN	NaN
Nb / Hp	Q9Z2Q5	Q9Z2Q5	-1.25762	1.25762	0.000237597	0.000791413	12	Q9Z2Q5	Mrpl40	Large ribosomal subunit protein mL40	RM40_MOUSE	5	-58.1766	0.418234	Nb	Hp	NaN	NaN	NaN
Nb / Hp	Q8BG94	Q8BG94	1.79878	1.79878	0.000237879	0.000791631	12	Q8BG94	Commd7	COMM domain-containing protein 7	COMD7_MOUSE	5	247.925	3.47925	Nb	Hp	NaN	NaN	NaN
Nb / Control	Q569Z6	Q569Z6	-1.71362	1.71362	0.000239068	0.000794862	12	Q569Z6	Thrap3	Thyroid hormone receptor-associated protein 3	TR150_MOUSE	18	-69.5105	0.304895	Nb	Control	NaN	NaN	NaN
Nb / Control	P56382	P56382	-1.38906	1.38906	0.00023998	0.000795002	12	P56382	Atp5f1e	ATP synthase subunit epsilon, mitochondrial	ATP5E_MOUSE	3	-61.8186	0.381814	Nb	Control	NaN	NaN	NaN
Nb / Hp	P80318	P80318	1.70698	1.70698	0.00023979	0.000795002	12	P80318	Cct3	T-complex protein 1 subunit gamma	TCPG_MOUSE	39	226.477	3.26477	Nb	Hp	NaN	NaN	NaN
Hp / Control	Q8R138	Q8R138	3.43561	3.43561	0.000239471	0.000795002	12	Q8R138	Tmem119	Transmembrane protein 119	TM119_MOUSE	2	981.989	10.8199	Hp	Control	NaN	NaN	NaN
Nb / Control	Q99K85	Q99K85	1.56497	1.56497	0.000239656	0.000795002	12	Q99K85	Psat1	Phosphoserine aminotransferase	SERC_MOUSE	22	195.871	2.95871	Nb	Control	NaN	NaN	NaN
Nb / Hp	Q64133	Q64133	-1.09293	1.09293	0.000240766	0.000796163	12	Q64133	Maoa	Amine oxidase [flavin-containing] A	AOFA_MOUSE	10	-53.1192	0.468808	Nb	Hp	NaN	NaN	NaN
Nb / Control	Q6NXH9;Q6NXH9	Q6NXH9	-4.01822	4.01822	0.000240743	0.000796163	12	NaN	TREMBL:Q6NXH9	Tax_Id=10090 Gene_Symbol=Krt73 Keratin 73	NaN	2	-93.8284	0.0617158	Nb	Control	NaN	NaN	NaN
Nb / Hp	P51912	P51912	-0.729797	0.729797	0.000241293	0.000797183	12	P51912	Slc1a5	Neutral amino acid transporter B(0)	AAAT_MOUSE	12	-39.7011	0.602989	Nb	Hp	NaN	NaN	NaN
Nb / Hp	P06795	P06795	-0.419553	0.419553	0.000242549	0.00080061	12	P06795	Abcb1b	ATP-dependent translocase ABCB1	MDR1B_MOUSE	16	-25.2344	0.747656	Nb	Hp	NaN	NaN	NaN
Nb / Hp	P11157	P11157	1.71885	1.71885	0.00024343	0.000802791	12	P11157	Rrm2	Ribonucleoside-diphosphate reductase subunit M2	RIR2_MOUSE	14	229.175	3.29175	Nb	Hp	NaN	NaN	NaN
Nb / Control	Q99JY4	Q99JY4	-1.0338	1.0338	0.000246148	0.000811022	12	Q99JY4	Trabd	TraB domain-containing protein	TRABD_MOUSE	9	-51.158	0.48842	Nb	Control	NaN	NaN	NaN
Nb / Hp	Q6P1H6	Q6P1H6	-1.52972	1.52972	0.000247266	0.0008118	12	Q6P1H6	Ankle2	Ankyrin repeat and LEM domain-containing protein 2	ANKL2_MOUSE	6	-65.3656	0.346344	Nb	Hp	NaN	NaN	NaN
Nb / Hp	Q80WR5	Q80WR5	-2.42649	2.42649	0.000247495	0.0008118	12	Q80WR5	NaN	UPF0688 protein C1orf174 homolog	CA174_MOUSE	2	-81.3982	0.186018	Nb	Hp	NaN	NaN	NaN
Nb / Hp	Q91X21	Q91X21	-1.2651	1.2651	0.000247382	0.0008118	12	Q91X21	Kiaa2013	Uncharacterized protein KIAA2013	K2013_MOUSE	9	-58.3929	0.416071	Nb	Hp	NaN	NaN	NaN
Hp / Control	Q9CZW4	Q9CZW4	1.05559	1.05559	0.000247299	0.0008118	12	Q9CZW4	Acsl3	Fatty acid CoA ligase Acsl3	ACSL3_MOUSE	18	107.857	2.07857	Hp	Control	NaN	NaN	NaN
Nb / Hp	Q9Z1G4	Q9Z1G4	-0.935009	0.935009	0.000247059	0.0008118	12	Q9Z1G4	Atp6v0a1	V-type proton ATPase 116 kDa subunit a 1	VPP1_MOUSE	15	-47.6961	0.523039	Nb	Hp	NaN	NaN	NaN
Nb / Hp	Q8BIG7	Q8BIG7	-0.606108	0.606108	0.000248373	0.000813952	12	Q8BIG7	Comtd1	Catechol O-methyltransferase domain-containing protein 1	CMTD1_MOUSE	7	-34.3034	0.656966	Nb	Hp	NaN	NaN	NaN
Nb / Hp	Q3UMB9	Q3UMB9	1.42471	1.42471	0.000248664	0.000814173	12	Q3UMB9	Washc4	WASH complex subunit 4	WASC4_MOUSE	11	168.46	2.6846	Nb	Hp	NaN	NaN	NaN
Nb / Control	Q6NZC7	Q6NZC7	1.41576	1.41576	0.000249519	0.000815512	12	Q6NZC7	Sec23ip	SEC23-interacting protein	S23IP_MOUSE	11	166.8	2.668	Nb	Control	NaN	NaN	NaN
Nb / Control	Q9R1Q9	Q9R1Q9	-1.18693	1.18693	0.000249326	0.000815512	12	Q9R1Q9	Atp6ap1	V-type proton ATPase subunit S1	VAS1_MOUSE	11	-56.0762	0.439238	Nb	Control	NaN	NaN	NaN
Nb / Hp	Q3U1G5	Q3U1G5	-1.41684	1.41684	0.000250023	0.000816429	12	Q3U1G5	Isg20l2	Interferon-stimulated 20 kDa exonuclease-like 2	I20L2_MOUSE	9	-62.5468	0.374532	Nb	Hp	NaN	NaN	NaN
Nb / Hp	Q8K4Z5	Q8K4Z5	-1.11449	1.11449	0.000250612	0.000816893	12	Q8K4Z5	Sf3a1	Splicing factor 3A subunit 1	SF3A1_MOUSE	33	-53.8145	0.461855	Nb	Hp	NaN	NaN	NaN
Nb / Control	Q8VHN8	Q8VHN8	2.20604	2.20604	0.000250433	0.000816893	12	Q8VHN8	Nudt16l1	Tudor-interacting repair regulator protein	TIRR_MOUSE	6	361.406	4.61406	Nb	Control	NaN	NaN	NaN
Nb / Hp	O70251	O70251	1.52263	1.52263	0.000251484	0.000817261	12	O70251	Eef1b	Elongation factor 1-beta	EF1B_MOUSE	6	187.314	2.87314	Nb	Hp	NaN	NaN	NaN
Nb / Hp	O70309	O70309	-0.942876	0.942876	0.000251843	0.000817261	12	O70309	Itgb5	Integrin beta-5	ITB5_MOUSE	8	-47.9805	0.520195	Nb	Hp	NaN	NaN	NaN
Nb / Hp	P47968	P47968	2.38678	2.38678	0.000251571	0.000817261	12	P47968	Rpia	Ribose-5-phosphate isomerase	RPIA_MOUSE	9	422.989	5.22989	Nb	Hp	NaN	NaN	NaN
Nb / Hp	Q8K2C7	Q8K2C7	-1.41856	1.41856	0.000251443	0.000817261	12	Q8K2C7	Os9	Protein OS-9	OS9_MOUSE	17	-62.5914	0.374086	Nb	Hp	NaN	NaN	NaN
Nb / Control	Q9Z2Q5	Q9Z2Q5	-1.45445	1.45445	0.000251798	0.000817261	12	Q9Z2Q5	Mrpl40	Large ribosomal subunit protein mL40	RM40_MOUSE	5	-63.5105	0.364895	Nb	Control	NaN	NaN	NaN
Nb / Hp	P46471	P46471	1.08118	1.08118	0.000253047	0.000818749	12	P46471	Psmc2	26S proteasome regulatory subunit 7	PRS7_MOUSE	28	111.577	2.11577	Nb	Hp	NaN	NaN	NaN
Nb / Hp	Q6P9Q6	Q6P9Q6	0.950362	0.950362	0.000253198	0.000818749	12	Q6P9Q6	Fkbp15	FK506-binding protein 15	FKB15_MOUSE	9	93.2357	1.93236	Nb	Hp	NaN	NaN	NaN
Nb / Hp	Q8BHX3	Q8BHX3	-1.52914	1.52914	0.000252582	0.000818749	12	Q8BHX3	Cdca8	Borealin	BOREA_MOUSE	10	-65.3515	0.346485	Nb	Hp	NaN	NaN	NaN
Nb / Hp	Q99P72	Q99P72	-1.40278	1.40278	0.000253077	0.000818749	12	Q99P72	Rtn4	Reticulon-4	RTN4_MOUSE	21	-62.18	0.3782	Nb	Hp	NaN	NaN	NaN
Nb / Hp	Q9D2V5	Q9D2V5	0.97004	0.97004	0.000253726	0.000819729	12	Q9D2V5	Aar2	Protein AAR2 homolog	AAR2_MOUSE	2	95.8895	1.95889	Nb	Hp	NaN	NaN	NaN
Nb / Hp	Q9CY66	Q9CY66	-0.634874	0.634874	0.000254114	0.000820259	12	Q9CY66	Gar1	H/ACA ribonucleoprotein complex subunit 1	GAR1_MOUSE	7	-35.6003	0.643997	Nb	Hp	NaN	NaN	NaN
Nb / Control	P11928	P11928	-0.501473	0.501473	0.000256088	0.000825901	12	P11928	Oas1a	2'-5'-oligoadenylate synthase 1A	OAS1A_MOUSE	14	-29.3615	0.706385	Nb	Control	NaN	NaN	NaN
Nb / Hp	B2RX12	B2RX12	-0.6732	0.6732	0.000256663	0.000826296	12	B2RX12	Abcc3	ATP-binding cassette sub-family C member 3	MRP3_MOUSE	22	-37.2886	0.627114	Nb	Hp	NaN	NaN	NaN
Nb / Hp	Q91WC9	Q91WC9	-0.494641	0.494641	0.000256598	0.000826296	12	Q91WC9	Daglb	Diacylglycerol lipase-beta	DGLB_MOUSE	11	-29.0262	0.709738	Nb	Hp	NaN	NaN	NaN
Nb / Hp	P08030	P08030	2.05935	2.05935	0.000257009	0.000826683	12	P08030	Aprt	Adenine phosphoribosyltransferase	APT_MOUSE	11	316.797	4.16797	Nb	Hp	NaN	NaN	NaN
Nb / Control	Q6PGF3	Q6PGF3	-1.39009	1.39009	0.000257361	0.000826789	12	Q6PGF3	Med16	Mediator of RNA polymerase II transcription subunit 16	MED16_MOUSE	4	-61.8459	0.381541	Nb	Control	NaN	NaN	NaN
Nb / Hp	Q6ZQB6	Q6ZQB6	1.03913	1.03913	0.000257495	0.000826789	12	Q6ZQB6	Ppip5k2	Inositol hexakisphosphate and diphosphoinositol-pentakisphosphate kinase 2	VIP2_MOUSE	9	105.499	2.05499	Nb	Hp	NaN	NaN	NaN
Nb / Hp	Q5XJY4	Q5XJY4	-1.01359	1.01359	0.000257835	0.000827154	12	Q5XJY4	Parl	Presenilin-associated rhomboid-like protein, mitochondrial	PARL_MOUSE	5	-50.4687	0.495313	Nb	Hp	NaN	NaN	NaN
Nb / Hp	Q9JHR7	Q9JHR7	2.25591	2.25591	0.000258439	0.000828365	12	Q9JHR7	Ide	Insulin-degrading enzyme	IDE_MOUSE	24	377.636	4.77636	Nb	Hp	NaN	NaN	NaN
Nb / Hp	P28798	P28798	-1.66508	1.66508	0.000259373	0.000830631	12	P28798	Grn	Progranulin	GRN_MOUSE	10	-68.4673	0.315327	Nb	Hp	NaN	NaN	NaN
Nb / Hp	P28033	P28033	-2.64762	2.64762	0.000259606	0.000830648	12	P28033	Cebpb	CCAAT/enhancer-binding protein beta	CEBPB_MOUSE	5	-84.0417	0.159583	Nb	Hp	NaN	NaN	NaN
Nb / Hp	O54988	O54988	1.25655	1.25655	0.000261393	0.000833447	12	O54988	Slk	STE20-like serine/threonine-protein kinase	SLK_MOUSE	19	138.924	2.38924	Nb	Hp	NaN	NaN	NaN
Hp / Control	P12265	P12265	-1.14829	1.14829	0.000261228	0.000833447	12	P12265	Gusb	Beta-glucuronidase	BGLR_MOUSE	24	-54.8839	0.451161	Hp	Control	NaN	NaN	NaN
Nb / Hp	P56382	P56382	-1.46821	1.46821	0.000261078	0.000833447	12	P56382	Atp5f1e	ATP synthase subunit epsilon, mitochondrial	ATP5E_MOUSE	3	-63.857	0.36143	Nb	Hp	NaN	NaN	NaN
Hp / Control	Q9QWR8	Q9QWR8	-1.45082	1.45082	0.000260713	0.000833447	12	Q9QWR8	Naga	Alpha-N-acetylgalactosaminidase	NAGAB_MOUSE	7	-63.4185	0.365815	Hp	Control	NaN	NaN	NaN
Nb / Hp	P02538	P02538	-1.70201	1.70201	0.00026191	0.000833639	12	NaN	SWISS-PROT:P02538	Tax_Id=9606 Gene_Symbol=KRT6A Keratin, type II cytoskeletal 6A	NaN	47	-69.2642	0.307358	Nb	Hp	NaN	NaN	NaN
Nb / Hp	Q9DCD0	Q9DCD0	1.95315	1.95315	0.000261715	0.000833639	12	Q9DCD0	Pgd	6-phosphogluconate dehydrogenase, decarboxylating	6PGD_MOUSE	27	287.22	3.8722	Nb	Hp	NaN	NaN	NaN
Nb / Control	Q5FWK3	Q5FWK3	1.82658	1.82658	0.000262141	0.000833648	12	Q5FWK3	Arhgap1	Rho GTPase-activating protein 1	RHG01_MOUSE	12	254.696	3.54696	Nb	Control	NaN	NaN	NaN
Nb / Hp	P11983	P11983	1.46768	1.46768	0.000265174	0.000842562	12	P11983	Tcp1	T-complex protein 1 subunit alpha	TCPA_MOUSE	32	176.576	2.76576	Nb	Hp	NaN	NaN	NaN
Nb / Hp	Q61550	Q61550	-0.817082	0.817082	0.000266659	0.000845809	12	Q61550	Rad21	Double-strand-break repair protein rad21 homolog	RAD21_MOUSE	12	-43.2411	0.567589	Nb	Hp	NaN	NaN	NaN
Nb / Control	Q8CGA0	Q8CGA0	2.16324	2.16324	0.000266563	0.000845809	12	Q8CGA0	Ppm1f	Protein phosphatase 1F	PPM1F_MOUSE	2	347.92	4.4792	Nb	Control	NaN	NaN	NaN
Nb / Control	Q3U3I9	Q3U3I9	-1.95714	1.95714	0.000267541	0.00084787	12	Q3U3I9	Znf865	Zinc finger protein 865	ZN865_MOUSE	2	-74.2461	0.257539	Nb	Control	NaN	NaN	NaN
Nb / Hp	P14152	P14152	1.91919	1.91919	0.000268758	0.000850991	12	P14152	Mdh1	Malate dehydrogenase, cytoplasmic	MDHC_MOUSE	14	278.21	3.7821	Nb	Hp	NaN	NaN	NaN
Nb / Hp	Q8K202	Q8K202	-1.20538	1.20538	0.000269186	0.000851605	12	Q8K202	Polr1e	DNA-directed RNA polymerase I subunit RPA49	RPA49_MOUSE	13	-56.6346	0.433654	Nb	Hp	NaN	NaN	NaN
Nb / Control	O89116	O89116	-1.36701	1.36701	0.000272001	0.000855346	12	O89116	Vti1a	Vesicle transport through interaction with t-SNAREs homolog 1A	VTI1A_MOUSE	3	-61.2305	0.387695	Nb	Control	NaN	NaN	NaN
Nb / Hp	P21460	P21460	-0.983529	0.983529	0.000271411	0.000855346	12	P21460	Cst3	Cystatin-C	CYTC_MOUSE	5	-49.4259	0.505741	Nb	Hp	NaN	NaN	NaN
Nb / Control	P40142	P40142	1.15798	1.15798	0.000273177	0.000855346	12	P40142	Tkt	Transketolase	TKT_MOUSE	34	123.145	2.23145	Nb	Control	NaN	NaN	NaN
Nb / Hp	P48036	P48036	2.16284	2.16284	0.000273015	0.000855346	12	P48036	Anxa5	Annexin A5	ANXA5_MOUSE	30	347.794	4.47794	Nb	Hp	NaN	NaN	NaN
Nb / Control	P55302	P55302	-1.11307	1.11307	0.000272245	0.000855346	12	P55302	Lrpap1	Alpha-2-macroglobulin receptor-associated protein	AMRP_MOUSE	19	-53.7691	0.462309	Nb	Control	NaN	NaN	NaN
Nb / Hp	P58281	P58281	-0.661071	0.661071	0.000271811	0.000855346	12	P58281	Opa1	Dynamin-like GTPase OPA1, mitochondrial	OPA1_MOUSE	26	-36.7592	0.632408	Nb	Hp	NaN	NaN	NaN
Nb / Hp	Q3TDQ1	Q3TDQ1	-1.08154	1.08154	0.000271203	0.000855346	12	Q3TDQ1	Stt3b	Dolichyl-diphosphooligosaccharide--protein glycosyltransferase subunit STT3B	STT3B_MOUSE	16	-52.7477	0.472523	Nb	Hp	NaN	NaN	NaN
Hp / Control	Q3TJZ6	Q3TJZ6	0.963232	0.963232	0.000271435	0.000855346	12	Q3TJZ6	Fam98a	Protein FAM98A	FA98A_MOUSE	7	94.9673	1.94967	Hp	Control	NaN	NaN	NaN
Nb / Hp	Q8K354	Q8K354	2.90766	2.90766	0.000272789	0.000855346	12	Q8K354	Cbr3	Carbonyl reductase [NADPH] 3	CBR3_MOUSE	5	650.399	7.50399	Nb	Hp	NaN	NaN	NaN
Nb / Control	Q922B9	Q922B9	-1.5452	1.5452	0.000271751	0.000855346	12	Q922B9	Itprid2	Protein ITPRID2	ITPI2_MOUSE	2	-65.7353	0.342647	Nb	Control	NaN	NaN	NaN
Nb / Hp	Q9CXR1	Q9CXR1	-1.14326	1.14326	0.000272498	0.000855346	12	Q9CXR1	Dhrs7	Dehydrogenase/reductase SDR family member 7	DHRS7_MOUSE	12	-54.7266	0.452734	Nb	Hp	NaN	NaN	NaN
Nb / Hp	Q9DBC7	Q9DBC7	1.05074	1.05074	0.000273141	0.000855346	12	Q9DBC7	Prkar1a	cAMP-dependent protein kinase type I-alpha regulatory subunit	KAP0_MOUSE	9	107.159	2.07159	Nb	Hp	NaN	NaN	NaN
Nb / Hp	Q9WU81	Q9WU81	-1.01313	1.01313	0.000273573	0.000855853	12	Q9WU81	Slc37a2	Glucose-6-phosphate exchanger SLC37A2	G6PT3_MOUSE	4	-50.4531	0.495469	Nb	Hp	NaN	NaN	NaN
Nb / Hp	P09055	P09055	-0.608212	0.608212	0.000274264	0.000856548	12	P09055	Itgb1	Integrin beta-1	ITB1_MOUSE	12	-34.3991	0.656009	Nb	Hp	NaN	NaN	NaN
Nb / Hp	Q9D958	Q9D958	-1.88394	1.88394	0.000274105	0.000856548	12	Q9D958	Spcs1	Signal peptidase complex subunit 1	SPCS1_MOUSE	2	-72.9057	0.270943	Nb	Hp	NaN	NaN	NaN
Nb / Control	Q9CTH6	Q9CTH6	-1.25536	1.25536	0.000274967	0.000857279	12	Q9CTH6	Fcf1	rRNA-processing protein FCF1 homolog	FCF1_MOUSE	5	-58.1111	0.418889	Nb	Control	NaN	NaN	NaN
Nb / Hp	Q9EPS3	Q9EPS3	-1.02142	1.02142	0.000274896	0.000857279	12	Q9EPS3	Glce	D-glucuronyl C5-epimerase	GLCE_MOUSE	10	-50.7367	0.492633	Nb	Hp	NaN	NaN	NaN
Nb / Hp	Q6PDG5	Q6PDG5	-0.892206	0.892206	0.000275813	0.000858451	12	Q6PDG5	Smarcc2	SWI/SNF complex subunit SMARCC2	SMRC2_MOUSE	9	-46.121	0.53879	Nb	Hp	NaN	NaN	NaN
Nb / Hp	Q8BWY3	Q8BWY3	1.82183	1.82183	0.000275595	0.000858451	12	Q8BWY3	Etf1	Eukaryotic peptide chain release factor subunit 1	ERF1_MOUSE	17	253.528	3.53528	Nb	Hp	NaN	NaN	NaN
Hp / Control	Q9WV03	Q9WV03	0.798967	0.798967	0.000276318	0.000859289	12	Q9WV03	Fam50a	Protein FAM50A	FA50A_MOUSE	5	73.9854	1.73985	Hp	Control	NaN	NaN	NaN
Nb / Hp	Q9CXJ4	Q9CXJ4	-0.865249	0.865249	0.000276575	0.00085936	12	Q9CXJ4	Abcb8	Mitochondrial potassium channel ATP-binding subunit	MITOS_MOUSE	12	-45.1048	0.548952	Nb	Hp	NaN	NaN	NaN
Nb / Control	Q99J45	Q99J45	1.97726	1.97726	0.000276953	0.0008598	12	Q99J45	Nrbp1	Nuclear receptor-binding protein	NRBP_MOUSE	3	293.745	3.93745	Nb	Control	NaN	NaN	NaN
Nb / Hp	Q9JKW0	Q9JKW0	-1.27024	1.27024	0.000278354	0.000863417	12	Q9JKW0	Arl6ip1	ADP-ribosylation factor-like protein 6-interacting protein 1	AR6P1_MOUSE	4	-58.541	0.41459	Nb	Hp	NaN	NaN	NaN
Nb / Hp	P47856	P47856	1.2754	1.2754	0.000278605	0.000863464	12	P47856	Gfpt1	Glutamine--fructose-6-phosphate aminotransferase [isomerizing] 1	GFPT1_MOUSE	19	142.065	2.42065	Nb	Hp	NaN	NaN	NaN
Nb / Hp	Q8C7V8	Q8C7V8	-1.27485	1.27485	0.000279217	0.000864626	12	Q8C7V8	Ccdc134	Coiled-coil domain-containing protein 134	CC134_MOUSE	6	-58.6733	0.413267	Nb	Hp	NaN	NaN	NaN
Nb / Hp	P63038	P63038	-0.771962	0.771962	0.000280931	0.000869198	12	P63038	Hspd1	60 kDa heat shock protein, mitochondrial	CH60_MOUSE	67	-41.438	0.58562	Nb	Hp	NaN	NaN	NaN
Nb / Hp	Q7TPV4	Q7TPV4	-0.779894	0.779894	0.0002822	0.000870913	12	Q7TPV4	Mybbp1a	Myb-binding protein 1A	MBB1A_MOUSE	73	-41.759	0.58241	Nb	Hp	NaN	NaN	NaN
Nb / Control	Q9CPW3	Q9CPW3	-1.89614	1.89614	0.000282135	0.000870913	12	Q9CPW3	Mrpl54	Large ribosomal subunit protein mL54	RM54_MOUSE	4	-73.1339	0.268661	Nb	Control	NaN	NaN	NaN
Nb / Hp	Q9QZQ8	Q9QZQ8	-1.25988	1.25988	0.00028198	0.000870913	12	Q9QZQ8	Macroh2a1	Core histone macro-H2A.1	H2AY_MOUSE	16	-58.2422	0.417578	Nb	Hp	NaN	NaN	NaN
Nb / Hp	Q8BHD7	Q8BHD7	-0.956748	0.956748	0.000283162	0.000873142	12	Q8BHD7	Ptbp3	Polypyrimidine tract-binding protein 3	PTBP3_MOUSE	12	-48.4783	0.515217	Nb	Hp	NaN	NaN	NaN
Nb / Hp	P50448	P50448	-1.65525	1.65525	0.000285432	0.0008794	12	NaN	SWISS-PROT:P50448	(Bos taurus) Factor XIIa inhibitor precursor	NaN	7	-68.2518	0.317482	Nb	Hp	NaN	NaN	NaN
Nb / Hp	P84099	P84099	0.855014	0.855014	0.000288098	0.000886865	12	P84099	Rpl19	Large ribosomal subunit protein eL19	RL19_MOUSE	12	80.8776	1.80878	Nb	Hp	NaN	NaN	NaN
Nb / Control	P15379	P15379	-1.21344	1.21344	0.000288864	0.000887971	12	P15379	Cd44	CD44 antigen	CD44_MOUSE	6	-56.8762	0.431238	Nb	Control	NaN	NaN	NaN
Nb / Hp	Q80V26	Q80V26	-1.03227	1.03227	0.000288943	0.000887971	12	Q80V26	Bpnt2	Golgi-resident adenosine 3',5'-bisphosphate 3'-phosphatase	IMPA3_MOUSE	6	-51.1061	0.488939	Nb	Hp	NaN	NaN	NaN
Hp / Control	P47199	P47199	-0.844999	0.844999	0.000289977	0.000890401	12	P47199	Cryz	Quinone oxidoreductase	QOR_MOUSE	6	-44.3289	0.556711	Hp	Control	NaN	NaN	NaN
Nb / Hp	O54781	O54781	1.56708	1.56708	0.000291161	0.000892276	12	O54781	Srpk2	SRSF protein kinase 2	SRPK2_MOUSE	4	196.305	2.96305	Nb	Hp	NaN	NaN	NaN
Nb / Hp	Q69ZR2	Q69ZR2	1.74919	1.74919	0.000291225	0.000892276	12	Q69ZR2	Hectd1	E3 ubiquitin-protein ligase HECTD1	HECD1_MOUSE	16	236.169	3.36169	Nb	Hp	NaN	NaN	NaN
Nb / Hp	Q8K078	Q8K078	-0.652738	0.652738	0.000291321	0.000892276	12	Q8K078	Slco4a1	Solute carrier organic anion transporter family member 4A1	SO4A1_MOUSE	11	-36.3928	0.636072	Nb	Hp	NaN	NaN	NaN
Nb / Hp	ENSEMBL:ENSBTAP00000024462;ENSEMBL:ENSBTAP00000024466	ENSEMBL:ENSBTAP00000024462;ENSEMBL:ENSBTAP00000024466	-2.86233	2.86233	0.000291683	0.000892639	12	NaN	(Bos	taurus) 47 kDa protein;taurus) 44 kDa protein	NaN	3	-86.2484	0.137516	Nb	Hp	NaN	NaN	NaN
Nb / Control	P24270	P24270	-1.23867	1.23867	0.000292255	0.000892893	12	P24270	Cat	Catalase	CATA_MOUSE	36	-57.6236	0.423764	Nb	Control	NaN	NaN	NaN
Nb / Hp	Q8BX90	Q8BX90	-1.16449	1.16449	0.000292237	0.000892893	12	Q8BX90	Fndc3a	Fibronectin type-III domain-containing protein 3A	FND3A_MOUSE	8	-55.3877	0.446123	Nb	Hp	NaN	NaN	NaN
Nb / Hp	P84078	P84078	1.20882	1.20882	0.000293535	0.000896055	12	P84078	Arf1	ADP-ribosylation factor 1	ARF1_MOUSE	14	131.149	2.31149	Nb	Hp	NaN	NaN	NaN
Nb / Hp	Q8CE96	Q8CE96	1.71645	1.71645	0.000294964	0.000899665	12	Q8CE96	Trmt6	tRNA (adenine(58)-N(1))-methyltransferase non-catalytic subunit TRM6	TRM6_MOUSE	8	228.627	3.28627	Nb	Hp	NaN	NaN	NaN
Nb / Hp	Q99JX4	Q99JX4	1.52054	1.52054	0.000296041	0.000902196	12	Q99JX4	Eif3m	Eukaryotic translation initiation factor 3 subunit M	EIF3M_MOUSE	16	186.898	2.86898	Nb	Hp	NaN	NaN	NaN
Nb / Hp	P42227	P42227	1.38133	1.38133	0.000297869	0.000905502	12	P42227	Stat3	Signal transducer and activator of transcription 3	STAT3_MOUSE	4	160.509	2.60509	Nb	Hp	NaN	NaN	NaN
Nb / Hp	Q3ZBS7	Q3ZBS7	-2.43428	2.43428	0.000297816	0.000905502	12	NaN	TREMBL:Q3ZBS7	(Bos taurus) Vitronectin	NaN	10	-81.4984	0.185016	Nb	Hp	NaN	NaN	NaN
Nb / Hp	Q61656	Q61656	-0.78025	0.78025	0.000297829	0.000905502	12	Q61656	Ddx5	Probable ATP-dependent RNA helicase DDX5	DDX5_MOUSE	40	-41.7734	0.582266	Nb	Hp	NaN	NaN	NaN
Nb / Control	Q8CIM3	Q8CIM3	-1.03343	1.03343	0.000298199	0.000905753	12	Q8CIM3	D2hgdh	D-2-hydroxyglutarate dehydrogenase, mitochondrial	D2HDH_MOUSE	6	-51.1451	0.488549	Nb	Control	NaN	NaN	NaN
Nb / Control	P06868	P06868	-0.77103	0.77103	0.000300558	0.000912158	12	NaN	SWISS-PROT:P06868	(Bos taurus) Plasminogen precursor	NaN	17	-41.4001	0.585999	Nb	Control	NaN	NaN	NaN
Nb / Control	Q91YQ5	Q91YQ5	-0.629941	0.629941	0.000300812	0.000912171	12	Q91YQ5	Rpn1	Dolichyl-diphosphooligosaccharide--protein glycosyltransferase subunit 1	RPN1_MOUSE	55	-35.3797	0.646203	Nb	Control	NaN	NaN	NaN
Nb / Hp	Q99M87	Q99M87	-0.601853	0.601853	0.000301674	0.000914027	12	Q99M87	Dnaja3	DnaJ homolog subfamily A member 3, mitochondrial	DNJA3_MOUSE	12	-34.1093	0.658907	Nb	Hp	NaN	NaN	NaN
Hp / Control	Q64337	Q64337	0.0304593	0.0304593	0.000302107	0.00091458	12	Q64337	Sqstm1	Sequestosome-1	SQSTM_MOUSE	5	2.13373	1.02134	Hp	Control	NaN	NaN	NaN
Nb / Hp	E9Q236	E9Q236	-0.676094	0.676094	0.000303913	0.000919286	12	E9Q236	Abcc4	ATP-binding cassette sub-family C member 4	MRP4_MOUSE	10	-37.4143	0.625857	Nb	Hp	NaN	NaN	NaN
Nb / Control	P20152	P20152	-1.095	1.095	0.000304563	0.000919728	12	P20152	Vim	Vimentin	VIME_MOUSE	72	-53.1864	0.468136	Nb	Control	NaN	NaN	NaN
Nb / Control	P62331	P62331	1.05265	1.05265	0.00030438	0.000919728	12	P62331	Arf6	ADP-ribosylation factor 6	ARF6_MOUSE	7	107.433	2.07433	Nb	Control	NaN	NaN	NaN
Nb / Control	Q3UGR5	Q3UGR5	1.09178	1.09178	0.000305868	0.000922908	12	Q3UGR5	Hdhd2	Haloacid dehalogenase-like hydrolase domain-containing protein 2	HDHD2_MOUSE	2	113.136	2.13136	Nb	Control	NaN	NaN	NaN
Nb / Hp	O55234	O55234	2.10675	2.10675	0.000306402	0.000922994	12	O55234	Psmb5	Proteasome subunit beta type-5	PSB5_MOUSE	14	330.721	4.30721	Nb	Hp	NaN	NaN	NaN
Nb / Hp	P09528	P09528	2.39044	2.39044	0.000306292	0.000922994	12	P09528	Fth1	Ferritin heavy chain	FRIH_MOUSE	8	424.318	5.24318	Nb	Hp	NaN	NaN	NaN
Nb / Hp	Q6P9J9	Q6P9J9	-0.973208	0.973208	0.000308497	0.00092854	12	Q6P9J9	Ano6	Anoctamin-6	ANO6_MOUSE	11	-49.0628	0.509372	Nb	Hp	NaN	NaN	NaN
Nb / Hp	P58681	P58681	-0.567121	0.567121	0.000309208	0.000929392	12	P58681	Tlr7	Toll-like receptor 7	TLR7_MOUSE	17	-32.5038	0.674962	Nb	Hp	NaN	NaN	NaN
Nb / Hp	Q8R5A3	Q8R5A3	1.14473	1.14473	0.000309289	0.000929392	12	Q8R5A3	Apbb1ip	Amyloid beta A4 precursor protein-binding family B member 1-interacting protein	AB1IP_MOUSE	12	121.104	2.21104	Nb	Hp	NaN	NaN	NaN
Nb / Hp	Q05910	Q05910	-1.56469	1.56469	0.000311753	0.000935259	12	Q05910	Adam8	Disintegrin and metalloproteinase domain-containing protein 8	ADAM8_MOUSE	3	-66.1951	0.338049	Nb	Hp	NaN	NaN	NaN
Nb / Hp	Q80UZ2	Q80UZ2	-0.615512	0.615512	0.0003116	0.000935259	12	Q80UZ2	Sdad1	Protein SDA1 homolog	SDA1_MOUSE	13	-34.7302	0.652698	Nb	Hp	NaN	NaN	NaN
Nb / Hp	Q80X80	Q80X80	-1.11343	1.11343	0.000312295	0.000935351	12	Q80X80	C2cd2l	Phospholipid transfer protein C2CD2L	C2C2L_MOUSE	4	-53.7806	0.462194	Nb	Hp	NaN	NaN	NaN
Nb / Hp	Q99N93	Q99N93	-1.01617	1.01617	0.0003122	0.000935351	12	Q99N93	Mrpl16	Large ribosomal subunit protein uL16m	RM16_MOUSE	7	-50.5574	0.494426	Nb	Hp	NaN	NaN	NaN
Nb / Hp	Q8VCF1	Q8VCF1	-1.25506	1.25506	0.000314432	0.000940209	12	Q8VCF1	Cant1	Soluble calcium-activated nucleotidase 1	CANT1_MOUSE	7	-58.1025	0.418975	Nb	Hp	NaN	NaN	NaN
Nb / Hp	Q922U1	Q922U1	-1.37331	1.37331	0.000314365	0.000940209	12	Q922U1	Prpf3	U4/U6 small nuclear ribonucleoprotein Prp3	PRPF3_MOUSE	23	-61.3995	0.386005	Nb	Hp	NaN	NaN	NaN
Nb / Hp	Q8R0K4	Q8R0K4	-1.75016	1.75016	0.000314888	0.000940802	12	Q8R0K4	Ccdc137	Coiled-coil domain-containing protein 137	CC137_MOUSE	7	-70.2732	0.297268	Nb	Hp	NaN	NaN	NaN
Nb / Hp	Q9CR60	Q9CR60	-1.54298	1.54298	0.000315231	0.000941057	12	Q9CR60	Golt1b	Vesicle transport protein GOT1B	GOT1B_MOUSE	5	-65.6825	0.343175	Nb	Hp	NaN	NaN	NaN
Nb / Control	Q9WU81	Q9WU81	-0.957346	0.957346	0.000316106	0.000942899	12	Q9WU81	Slc37a2	Glucose-6-phosphate exchanger SLC37A2	G6PT3_MOUSE	4	-48.4997	0.515003	Nb	Control	NaN	NaN	NaN
Nb / Control	Q8R1V4	Q8R1V4	-0.610392	0.610392	0.000316516	0.000943082	12	Q8R1V4	Tmed4	Transmembrane emp24 domain-containing protein 4	TMED4_MOUSE	8	-34.4981	0.655019	Nb	Control	NaN	NaN	NaN
Nb / Control	Q9ET30	Q9ET30	-0.630057	0.630057	0.000316683	0.000943082	12	Q9ET30	Tm9sf3	Transmembrane 9 superfamily member 3	TM9S3_MOUSE	14	-35.3849	0.646151	Nb	Control	NaN	NaN	NaN
Nb / Control	O35143	O35143	-0.878646	0.878646	0.00031779	0.000943317	12	O35143	Atp5if1	ATPase inhibitor, mitochondrial	ATIF1_MOUSE	5	-45.6122	0.543878	Nb	Control	NaN	NaN	NaN
Nb / Control	P70404	P70404	-1.49817	1.49817	0.000317795	0.000943317	12	P70404	Idh3g	Isocitrate dehydrogenase [NAD] subunit gamma 1, mitochondrial	IDHG1_MOUSE	13	-64.5997	0.354003	Nb	Control	NaN	NaN	NaN
Nb / Control	P97355	P97355	1.87272	1.87272	0.000317281	0.000943317	12	P97355	Sms	Spermine synthase	SPSY_MOUSE	6	266.223	3.66223	Nb	Control	NaN	NaN	NaN
Nb / Hp	Q9JIG7	Q9JIG7	0.945949	0.945949	0.00031704	0.000943317	12	Q9JIG7	Ccdc22	Coiled-coil domain-containing protein 22	CCD22_MOUSE	16	92.6456	1.92646	Nb	Hp	NaN	NaN	NaN
Nb / Control	Q921L3	Q921L3	-0.477959	0.477959	0.000319009	0.000946152	12	Q921L3	Tmco1	Calcium load-activated calcium channel	TMCO1_MOUSE	6	-28.2007	0.717993	Nb	Control	NaN	NaN	NaN
Nb / Control	P16110	P16110	2.22598	2.22598	0.00032003	0.000948411	12	P16110	Lgals3	Galectin-3	LEG3_MOUSE	6	367.829	4.67829	Nb	Control	NaN	NaN	NaN
Nb / Control	P04117	P04117	2.84445	2.84445	0.000320427	0.000948816	12	P04117	Fabp4	Fatty acid-binding protein, adipocyte	FABP4_MOUSE	7	618.231	7.18231	Nb	Control	NaN	NaN	NaN
Nb / Hp	O55106	O55106	-0.505625	0.505625	0.000322076	0.000952927	12	O55106	Strn	Striatin	STRN_MOUSE	9	-29.5645	0.704355	Nb	Hp	NaN	NaN	NaN
Nb / Control	Q9DB27	Q9DB27	2.27307	2.27307	0.000322594	0.000953689	12	Q9DB27	Mcts1	Malignant T-cell-amplified sequence 1	MCTS1_MOUSE	4	383.351	4.83351	Nb	Control	NaN	NaN	NaN
Nb / Hp	Q02614	Q02614	-2.40341	2.40341	0.000323267	0.000954571	12	Q02614	Sap30bp	SAP30-binding protein	S30BP_MOUSE	2	-81.0983	0.189017	Nb	Hp	NaN	NaN	NaN
Nb / Hp	Q7TSZ8	Q7TSZ8	-1.46198	1.46198	0.000323415	0.000954571	12	Q7TSZ8	Nacc1	Nucleus accumbens-associated protein 1	NACC1_MOUSE	3	-63.7006	0.362994	Nb	Hp	NaN	NaN	NaN
Nb / Hp	Q8BJY1	Q8BJY1	1.60662	1.60662	0.000324138	0.000955931	12	Q8BJY1	Psmd5	26S proteasome non-ATPase regulatory subunit 5	PSMD5_MOUSE	17	204.538	3.04538	Nb	Hp	NaN	NaN	NaN
Nb / Control	Q6PGB6	Q6PGB6	2.19808	2.19808	0.000325012	0.000957737	12	Q6PGB6	Naa50	N-alpha-acetyltransferase 50	NAA50_MOUSE	13	358.87	4.5887	Nb	Control	NaN	NaN	NaN
Nb / Hp	P56135	P56135	-1.23249	1.23249	0.000325769	0.000958692	12	P56135	Atp5mf	ATP synthase subunit f, mitochondrial	ATPK_MOUSE	6	-57.4418	0.425582	Nb	Hp	NaN	NaN	NaN
Nb / Hp	Q8VEK3	Q8VEK3	-1.13813	1.13813	0.000325861	0.000958692	12	Q8VEK3	Hnrnpu	Heterogeneous nuclear ribonucleoprotein U	HNRPU_MOUSE	52	-54.5651	0.454349	Nb	Hp	NaN	NaN	NaN
Nb / Hp	P48962	P48962	-0.816982	0.816982	0.000327229	0.000960127	12	P48962	Slc25a4	ADP/ATP translocase 1	ADT1_MOUSE	30	-43.2372	0.567628	Nb	Hp	NaN	NaN	NaN
Nb / Control	P80316	P80316	1.47064	1.47064	0.000326676	0.000960127	12	P80316	Cct5	T-complex protein 1 subunit epsilon	TCPE_MOUSE	36	177.145	2.77145	Nb	Control	NaN	NaN	NaN
Nb / Hp	Q91ZX7	Q91ZX7	-0.825511	0.825511	0.00032713	0.000960127	12	Q91ZX7	Lrp1	Prolow-density lipoprotein receptor-related protein 1	LRP1_MOUSE	117	-43.5718	0.564282	Nb	Hp	NaN	NaN	NaN
Nb / Hp	Q9R1P0	Q9R1P0	2.11746	2.11746	0.0003274	0.000960127	12	Q9R1P0	Psma4	Proteasome subunit alpha type-4	PSA4_MOUSE	14	333.931	4.33931	Nb	Hp	NaN	NaN	NaN
Nb / Hp	P35282	P35282	-0.483706	0.483706	0.000328587	0.000960671	12	P35282	Rab21	Ras-related protein Rab-21	RAB21_MOUSE	7	-28.4862	0.715138	Nb	Hp	NaN	NaN	NaN
Nb / Control	P43277	P43277	-1.57701	1.57701	0.000328278	0.000960671	12	P43277	H1-3	Histone H1.3	H13_MOUSE	19	-66.4825	0.335175	Nb	Control	NaN	NaN	NaN
Nb / Hp	Q61599	Q61599	1.33769	1.33769	0.000328637	0.000960671	12	Q61599	Arhgdib	Rho GDP-dissociation inhibitor 2	GDIR2_MOUSE	9	152.746	2.52746	Nb	Hp	NaN	NaN	NaN
Nb / Hp	Q9WUU7	Q9WUU7	0.757421	0.757421	0.000328333	0.000960671	12	Q9WUU7	Ctsz	Cathepsin Z	CATZ_MOUSE	12	69.0466	1.69047	Nb	Hp	NaN	NaN	NaN
Nb / Control	Q9CZW5	Q9CZW5	-1.50549	1.50549	0.000328947	0.000960808	12	Q9CZW5	Tomm70	Mitochondrial import receptor subunit TOM70	TOM70_MOUSE	27	-64.7788	0.352212	Nb	Control	NaN	NaN	NaN
Nb / Hp	P50580	P50580	2.11982	2.11982	0.000329808	0.000961297	12	P50580	Pa2g4	Proliferation-associated protein 2G4	PA2G4_MOUSE	27	334.639	4.34639	Nb	Hp	NaN	NaN	NaN
Nb / Hp	Q3USH5	Q3USH5	-1.93559	1.93559	0.000330053	0.000961297	12	Q3USH5	Sfswap	Splicing factor, suppressor of white-apricot homolog	SFSWA_MOUSE	3	-73.8586	0.261414	Nb	Hp	NaN	NaN	NaN
Nb / Hp	Q9CZM2	Q9CZM2	1.43009	1.43009	0.000330028	0.000961297	12	Q9CZM2	Rpl15	Large ribosomal subunit protein eL15	RL15_MOUSE	10	169.463	2.69463	Nb	Hp	NaN	NaN	NaN
Nb / Control	Q9QUR6	Q9QUR6	1.73581	1.73581	0.000330166	0.000961297	12	Q9QUR6	Prep	Prolyl endopeptidase	PPCE_MOUSE	30	233.067	3.33067	Nb	Control	NaN	NaN	NaN
Nb / Hp	Q91ZE0	Q91ZE0	0.954725	0.954725	0.000331048	0.000963098	12	Q91ZE0	Tmlhe	Trimethyllysine dioxygenase, mitochondrial	TMLH_MOUSE	4	93.821	1.93821	Nb	Hp	NaN	NaN	NaN
Nb / Hp	O35143	O35143	-0.931254	0.931254	0.000331711	0.000964256	12	O35143	Atp5if1	ATPase inhibitor, mitochondrial	ATIF1_MOUSE	5	-47.5598	0.524402	Nb	Hp	NaN	NaN	NaN
Nb / Hp	O08604	O08604	-0.555302	0.555302	0.000333363	0.000966753	12	O08604	Raet1c	Retinoic acid early-inducible protein 1-gamma	RAE1C_MOUSE	2	-31.9485	0.680515	Nb	Hp	NaN	NaN	NaN
Nb / Hp	Q64455	Q64455	-0.613415	0.613415	0.00033333	0.000966753	12	Q64455	Ptprj	Receptor-type tyrosine-protein phosphatase eta	PTPRJ_MOUSE	12	-34.6352	0.653648	Nb	Hp	NaN	NaN	NaN
Nb / Hp	Q78JE5	Q78JE5	1.97395	1.97395	0.000333012	0.000966753	12	Q78JE5	Fbxo22	F-box only protein 22	FBX22_MOUSE	5	292.842	3.92842	Nb	Hp	NaN	NaN	NaN
Nb / Control	P11031	P11031	1.99572	1.99572	0.000334326	0.000966956	12	P11031	Sub1	Activated RNA polymerase II transcriptional coactivator p15	TCP4_MOUSE	7	298.814	3.98814	Nb	Control	NaN	NaN	NaN
Nb / Control	Q3TVI8	Q3TVI8	-1.32852	1.32852	0.000334492	0.000966956	12	Q3TVI8	Pbxip1	Pre-B-cell leukemia transcription factor-interacting protein 1	PBIP1_MOUSE	19	-60.1822	0.398178	Nb	Control	NaN	NaN	NaN
Nb / Hp	Q9DB42	Q9DB42	-1.0707	1.0707	0.000334114	0.000966956	12	Q9DB42	Znf593	Zinc finger protein 593	ZN593_MOUSE	3	-52.3911	0.476089	Nb	Hp	NaN	NaN	NaN
Nb / Hp	Q9QZE7	Q9QZE7	2.22155	2.22155	0.000334483	0.000966956	12	Q9QZE7	Tsnax	Translin-associated protein X	TSNAX_MOUSE	7	366.394	4.66394	Nb	Hp	NaN	NaN	NaN
Nb / Hp	Q9DBG3	Q9DBG3	0.840808	0.840808	0.000336068	0.000970745	12	Q9DBG3	Ap2b1	AP-2 complex subunit beta	AP2B1_MOUSE	21	79.1053	1.79105	Nb	Hp	NaN	NaN	NaN
Nb / Hp	Q91YM4	Q91YM4	-0.233633	0.233633	0.00033808	0.000975785	12	Q91YM4	Tbrg4	FAST kinase domain-containing protein 4	FAKD4_MOUSE	17	-14.9509	0.850491	Nb	Hp	NaN	NaN	NaN
Nb / Hp	Q61183	Q61183	1.71872	1.71872	0.000339514	0.000978695	12	Q61183	Papola	Poly(A) polymerase alpha	PAPOA_MOUSE	12	229.143	3.29143	Nb	Hp	NaN	NaN	NaN
Nb / Hp	Q9D0C4	Q9D0C4	1.67179	1.67179	0.000339624	0.000978695	12	Q9D0C4	Trmt5	tRNA (guanine(37)-N1)-methyltransferase	TRM5_MOUSE	7	218.611	3.18611	Nb	Hp	NaN	NaN	NaN
Hp / Control	P47963	P47963	-0.425056	0.425056	0.000340946	0.000980187	12	P47963	Rpl13	Large ribosomal subunit protein eL13	RL13_MOUSE	17	-25.519	0.74481	Hp	Control	NaN	NaN	NaN
Nb / Hp	Q64729	Q64729	-2.12967	2.12967	0.000340857	0.000980187	12	Q64729	Tgfbr1	TGF-beta receptor type-1	TGFR1_MOUSE	3	-77.1489	0.228511	Nb	Hp	NaN	NaN	NaN
Nb / Control	Q9Z1E4	Q9Z1E4	1.75243	1.75243	0.000340879	0.000980187	12	Q9Z1E4	Gys1	Glycogen [starch] synthase, muscle	GYS1_MOUSE	5	236.926	3.36926	Nb	Control	NaN	NaN	NaN
Nb / Hp	Q9WTZ0	Q9WTZ0	1.24024	1.24024	0.000342869	0.000984941	12	Q9WTZ0	Uxt	Protein UXT	UXT_MOUSE	3	136.238	2.36238	Nb	Hp	NaN	NaN	NaN
Nb / Control	O55143	O55143	-1.13244	1.13244	0.000344557	0.00098806	12	O55143	Atp2a2	Sarcoplasmic/endoplasmic reticulum calcium ATPase 2	AT2A2_MOUSE	57	-54.3855	0.456145	Nb	Control	NaN	NaN	NaN
Nb / Hp	Q2KJC7	Q2KJC7	-1.23645	1.23645	0.000345037	0.00098806	12	NaN	TREMBL:Q2KJC7;Q8HZM3	(Bos taurus) Periostin, osteoblast specific factor	NaN	6	-57.5584	0.424416	Nb	Hp	NaN	NaN	NaN
Nb / Hp	Q8R0G9	Q8R0G9	-0.558036	0.558036	0.000344605	0.00098806	12	Q8R0G9	Nup133	Nuclear pore complex protein Nup133	NU133_MOUSE	29	-32.0774	0.679226	Nb	Hp	NaN	NaN	NaN
Nb / Hp	Q9WTX8	Q9WTX8	-0.673756	0.673756	0.000344858	0.00098806	12	Q9WTX8	Mad1l1	Mitotic spindle assembly checkpoint protein MAD1	MD1L1_MOUSE	19	-37.3127	0.626873	Nb	Hp	NaN	NaN	NaN
Nb / Hp	P47962	P47962	1.58617	1.58617	0.000346223	0.00098913	12	P47962	Rpl5	Large ribosomal subunit protein uL18	RL5_MOUSE	24	200.251	3.00251	Nb	Hp	NaN	NaN	NaN
Nb / Hp	Q8BIP0	Q8BIP0	0.351524	0.351524	0.000346069	0.00098913	12	Q8BIP0	Dars2	Aspartate--tRNA ligase, mitochondrial	SYDM_MOUSE	13	27.5908	1.27591	Nb	Hp	NaN	NaN	NaN
Nb / Control	Q99LY9	Q99LY9	-0.730657	0.730657	0.000345931	0.00098913	12	Q99LY9	Ndufs5	NADH dehydrogenase [ubiquinone] iron-sulfur protein 5	NDUS5_MOUSE	8	-39.737	0.60263	Nb	Control	NaN	NaN	NaN
Nb / Hp	Q8R0F3	Q8R0F3	-0.636565	0.636565	0.000346707	0.000989741	12	Q8R0F3	Sumf1	Formylglycine-generating enzyme	SUMF1_MOUSE	5	-35.6757	0.643243	Nb	Hp	NaN	NaN	NaN
Nb / Hp	Q8K4B0	Q8K4B0	-0.278346	0.278346	0.000347246	0.000990505	12	Q8K4B0	Mta1	Metastasis-associated protein MTA1	MTA1_MOUSE	18	-17.5464	0.824536	Nb	Hp	NaN	NaN	NaN
Nb / Hp	Q8VBT0	Q8VBT0	-1.28403	1.28403	0.000347804	0.000991322	12	Q8VBT0	Tmx1	Thioredoxin-related transmembrane protein 1	TMX1_MOUSE	11	-58.9353	0.410647	Nb	Hp	NaN	NaN	NaN
Nb / Hp	P62309	P62309	0.512399	0.512399	0.000348079	0.000991335	12	P62309	Snrpg	Small nuclear ribonucleoprotein G	RUXG_MOUSE	3	42.642	1.42642	Nb	Hp	NaN	NaN	NaN
Nb / Hp	P05201	P05201	2.49493	2.49493	0.000348815	0.0009924	12	P05201	Got1	Aspartate aminotransferase, cytoplasmic	AATC_MOUSE	22	463.702	5.63702	Nb	Hp	NaN	NaN	NaN
Nb / Hp	Q9D0E1	Q9D0E1	-1.44985	1.44985	0.000348997	0.0009924	12	Q9D0E1	Hnrnpm	Heterogeneous nuclear ribonucleoprotein M	HNRPM_MOUSE	56	-63.3941	0.366059	Nb	Hp	NaN	NaN	NaN
Nb / Hp	Q9EQJ0	Q9EQJ0	-1.02952	1.02952	0.000350764	0.000996649	12	Q9EQJ0	Tpcn1	Two pore calcium channel protein 1	TPC1_MOUSE	3	-51.0127	0.489873	Nb	Hp	NaN	NaN	NaN
Nb / Hp	Q9QYC0	Q9QYC0	1.48731	1.48731	0.000351705	0.000998548	12	Q9QYC0	Add1	Alpha-adducin	ADDA_MOUSE	4	180.365	2.80365	Nb	Hp	NaN	NaN	NaN
Hp / Control	Q04750	Q04750	-0.901423	0.901423	0.000353821	0.00100378	12	Q04750	Top1	DNA topoisomerase 1	TOP1_MOUSE	42	-46.4642	0.535358	Hp	Control	NaN	NaN	NaN
Hp / Control	Q922H1	Q922H1	-0.92061	0.92061	0.000355279	0.00100713	12	Q922H1	Prmt3	Protein arginine N-methyltransferase 3	ANM3_MOUSE	8	-47.1714	0.528286	Hp	Control	NaN	NaN	NaN
Nb / Control	Q8C6B9	Q8C6B9	-1.45257	1.45257	0.000355589	0.00100723	12	Q8C6B9	Rps19bp1	Active regulator of SIRT1	AROS_MOUSE	8	-63.4629	0.365371	Nb	Control	NaN	NaN	NaN
Nb / Hp	Q78IK4	Q78IK4	-1.28302	1.28302	0.000356881	0.0010101	12	Q78IK4	Apool	MICOS complex subunit Mic27	MIC27_MOUSE	14	-58.9064	0.410936	Nb	Hp	NaN	NaN	NaN
Nb / Hp	Q9CWX2	Q9CWX2	-0.892027	0.892027	0.000359176	0.00101522	12	Q9CWX2	Ndufaf1	Complex I intermediate-associated protein 30, mitochondrial	CIA30_MOUSE	11	-46.1143	0.538857	Nb	Hp	NaN	NaN	NaN
Nb / Control	Q9CY57	Q9CY57	-1.79754	1.79754	0.000359243	0.00101522	12	Q9CY57	Chtop	Chromatin target of PRMT1 protein	CHTOP_MOUSE	5	-71.2335	0.287665	Nb	Control	NaN	NaN	NaN
Nb / Hp	Q8K2A7	Q8K2A7	-0.841654	0.841654	0.000361289	0.00102021	12	Q8K2A7	Ints10	Integrator complex subunit 10	INT10_MOUSE	9	-44.1997	0.558003	Nb	Hp	NaN	NaN	NaN
Nb / Hp	Q3UVK0	Q3UVK0	-1.20779	1.20779	0.000363285	0.00102505	12	Q3UVK0	Ermp1	Endoplasmic reticulum metallopeptidase 1	ERMP1_MOUSE	18	-56.7068	0.432932	Nb	Hp	NaN	NaN	NaN
Nb / Hp	Q8BI84	Q8BI84	-1.4019	1.4019	0.000364316	0.00102717	12	Q8BI84	Mia3	Transport and Golgi organization protein 1 homolog	TGO1_MOUSE	31	-62.1571	0.378429	Nb	Hp	NaN	NaN	NaN
Nb / Hp	O55100	O55100	-1.06329	1.06329	0.000365578	0.00102993	12	O55100	Syngr1	Synaptogyrin-1	SNG1_MOUSE	2	-52.1462	0.478538	Nb	Hp	NaN	NaN	NaN
Nb / Hp	Q810B6	Q810B6	1.47651	1.47651	0.000366652	0.00103216	12	Q810B6	Ankfy1	Rabankyrin-5	ANFY1_MOUSE	11	178.275	2.78275	Nb	Hp	NaN	NaN	NaN
Nb / Hp	Q9CZY3	Q9CZY3	2.30938	2.30938	0.000367197	0.0010329	12	Q9CZY3	Ube2v1	Ubiquitin-conjugating enzyme E2 variant 1	UB2V1_MOUSE	6	395.671	4.95671	Nb	Hp	NaN	NaN	NaN
Nb / Hp	P0C0A3	P0C0A3	-1.03715	1.03715	0.000369036	0.00103588	12	P0C0A3	Chmp6	Charged multivesicular body protein 6	CHMP6_MOUSE	4	-51.2711	0.487289	Nb	Hp	NaN	NaN	NaN
Nb / Hp	Q68FH4	Q68FH4	2.28245	2.28245	0.000369182	0.00103588	12	Q68FH4	Galk2	N-acetylgalactosamine kinase	GALK2_MOUSE	6	386.504	4.86504	Nb	Hp	NaN	NaN	NaN
Nb / Control	Q8K2L8	Q8K2L8	2.56331	2.56331	0.000369391	0.00103588	12	Q8K2L8	Trappc12	Trafficking protein particle complex subunit 12	TPC12_MOUSE	2	491.062	5.91062	Nb	Control	NaN	NaN	NaN
Nb / Hp	Q91VW3	Q91VW3	2.10145	2.10145	0.000369269	0.00103588	12	Q91VW3	Sh3bgrl3	SH3 domain-binding glutamic acid-rich-like protein 3	SH3L3_MOUSE	3	329.141	4.29141	Nb	Hp	NaN	NaN	NaN
Nb / Control	Q9CQI6	Q9CQI6	2.51549	2.51549	0.00037051	0.00103743	12	Q9CQI6	Cotl1	Coactosin-like protein	COTL1_MOUSE	13	471.79	5.7179	Nb	Control	NaN	NaN	NaN
Nb / Hp	Q9CQJ4	Q9CQJ4	-1.5213	1.5213	0.000370313	0.00103743	12	Q9CQJ4	Rnf2	E3 ubiquitin-protein ligase RING2	RING2_MOUSE	6	-65.1627	0.348373	Nb	Hp	NaN	NaN	NaN
Nb / Hp	P62827	P62827	1.16819	1.16819	0.000371764	0.0010394	12	P62827	Ran	GTP-binding nuclear protein Ran	RAN_MOUSE	12	124.729	2.24729	Nb	Hp	NaN	NaN	NaN
Nb / Hp	Q80SW1	Q80SW1	1.4271	1.4271	0.000371785	0.0010394	12	Q80SW1	Ahcyl1	S-adenosylhomocysteine hydrolase-like protein 1	SAHH2_MOUSE	8	168.905	2.68905	Nb	Hp	NaN	NaN	NaN
Nb / Hp	Q9JJ06	Q9JJ06	-1.80883	1.80883	0.000372727	0.00104124	12	Q9JJ06	C1galt1	Glycoprotein-N-acetylgalactosamine 3-beta-galactosyltransferase 1	C1GLT_MOUSE	4	-71.4577	0.285423	Nb	Hp	NaN	NaN	NaN
Nb / Hp	Q8VCY6	Q8VCY6	-0.610676	0.610676	0.000373242	0.00104158	12	Q8VCY6	Utp6	U3 small nucleolar RNA-associated protein 6 homolog	UTP6_MOUSE	22	-34.511	0.65489	Nb	Hp	NaN	NaN	NaN
Nb / Hp	Q9DAR7	Q9DAR7	1.94354	1.94354	0.000373418	0.00104158	12	Q9DAR7	Dcps	m7GpppX diphosphatase	DCPS_MOUSE	13	284.648	3.84648	Nb	Hp	NaN	NaN	NaN
Nb / Hp	Q91WG3	Q91WG3	-1.06922	1.06922	0.000375241	0.00104348	12	Q91WG3	Trub2	Pseudouridylate synthase TRUB2, mitochondrial	TRUB2_MOUSE	8	-52.3425	0.476575	Nb	Hp	NaN	NaN	NaN
Nb / Hp	Q91YJ5	Q91YJ5	-0.149613	0.149613	0.000374574	0.00104348	12	Q91YJ5	Mtif2	Translation initiation factor IF-2, mitochondrial	IF2M_MOUSE	6	-9.85078	0.901492	Nb	Hp	NaN	NaN	NaN
Nb / Hp	Q99JX7	Q99JX7	-0.664586	0.664586	0.000375003	0.00104348	12	Q99JX7	Nxf1	Nuclear RNA export factor 1	NXF1_MOUSE	24	-36.913	0.63087	Nb	Hp	NaN	NaN	NaN
Nb / Hp	Q9JLQ0	Q9JLQ0	-0.840178	0.840178	0.000374967	0.00104348	12	Q9JLQ0	Cd2ap	CD2-associated protein	CD2AP_MOUSE	4	-44.1426	0.558574	Nb	Hp	NaN	NaN	NaN
Nb / Hp	Q1RMK2	Q1RMK2	-2.26543	2.26543	0.000378268	0.0010511	12	NaN	TREMBL:Q1RMK2	(Bos taurus) IGHM protein	NaN	9	-79.2012	0.207988	Nb	Hp	NaN	NaN	NaN
Nb / Hp	Q9DBU0	Q9DBU0	-0.898593	0.898593	0.000379127	0.00105268	12	Q9DBU0	Tm9sf1	Transmembrane 9 superfamily member 1	TM9S1_MOUSE	8	-46.359	0.53641	Nb	Hp	NaN	NaN	NaN
Nb / Hp	Q9JJT0	Q9JJT0	-0.385377	0.385377	0.000380035	0.0010544	12	Q9JJT0	Rcl1	RNA 3'-terminal phosphate cyclase-like protein	RCL1_MOUSE	15	-23.4421	0.765579	Nb	Hp	NaN	NaN	NaN
Nb / Hp	P62983	P62983	-1.20719	1.20719	0.000382134	0.00105882	12	P62983	Rps27a	Ubiquitin-ribosomal protein eS31 fusion protein	RS27A_MOUSE	12	-56.6888	0.433112	Nb	Hp	NaN	NaN	NaN
Nb / Hp	Q3THK7	Q3THK7	1.79744	1.79744	0.000382207	0.00105882	12	Q3THK7	Gmps	GMP synthase [glutamine-hydrolyzing]	GUAA_MOUSE	21	247.602	3.47602	Nb	Hp	NaN	NaN	NaN
Nb / Hp	Q9D0F3	Q9D0F3	-0.819073	0.819073	0.000383103	0.0010605	12	Q9D0F3	Lman1	Protein ERGIC-53	LMAN1_MOUSE	21	-43.3194	0.566806	Nb	Hp	NaN	NaN	NaN
Nb / Hp	P28063	P28063	2.29224	2.29224	0.00038663	0.00106703	12	P28063	Psmb8	Proteasome subunit beta type-8	PSB8_MOUSE	10	389.817	4.89817	Nb	Hp	NaN	NaN	NaN
Nb / Control	Q61206	Q61206	2.70634	2.70634	0.000386367	0.00106703	12	Q61206	Pafah1b2	Platelet-activating factor acetylhydrolase IB subunit alpha2	PA1B2_MOUSE	2	552.663	6.52663	Nb	Control	NaN	NaN	NaN
Hp / Control	Q6ZWV7	Q6ZWV7	-0.499577	0.499577	0.000386133	0.00106703	12	Q6ZWV7	Rpl35	Large ribosomal subunit protein uL29	RL35_MOUSE	6	-29.2686	0.707314	Hp	Control	NaN	NaN	NaN
Nb / Control	Q9JJ89	Q9JJ89	-1.58797	1.58797	0.000385967	0.00106703	12	Q9JJ89	Ccdc86	Coiled-coil domain-containing protein 86	CCD86_MOUSE	9	-66.7362	0.332638	Nb	Control	NaN	NaN	NaN
Hp / Control	Q9D6F9	Q9D6F9	-0.0828038	0.0828038	0.000387563	0.0010688	12	Q9D6F9	Tubb4a	Tubulin beta-4A chain	TBB4A_MOUSE	2	-5.57791	0.944221	Hp	Control	NaN	NaN	NaN
Nb / Hp	O88396	O88396	-0.897632	0.897632	0.000387918	0.00106897	12	O88396	Grpel2	GrpE protein homolog 2, mitochondrial	GRPE2_MOUSE	2	-46.3233	0.536767	Nb	Hp	NaN	NaN	NaN
Nb / Hp	O70404	O70404	-1.56683	1.56683	0.0003891	0.001069	12	O70404	Vamp8	Vesicle-associated membrane protein 8	VAMP8_MOUSE	8	-66.245	0.33755	Nb	Hp	NaN	NaN	NaN
Nb / Hp	Q8CD26	Q8CD26	-1.07571	1.07571	0.000389061	0.001069	12	Q8CD26	Slc35e1	Solute carrier family 35 member E1	S35E1_MOUSE	3	-52.5562	0.474438	Nb	Hp	NaN	NaN	NaN
Nb / Hp	Q8CG72	Q8CG72	2.00161	2.00161	0.000388815	0.001069	12	Q8CG72	Adprs	ADP-ribosylhydrolase ARH3	ADPRS_MOUSE	7	300.447	4.00447	Nb	Hp	NaN	NaN	NaN
Nb / Hp	Q9CQT1	Q9CQT1	2.05419	2.05419	0.000388692	0.001069	12	Q9CQT1	Mri1	Methylthioribose-1-phosphate isomerase	MTNA_MOUSE	9	315.309	4.15309	Nb	Hp	NaN	NaN	NaN
Nb / Control	P63017	P63017	1.19885	1.19885	0.000390255	0.00106976	12	P63017	Hspa8	Heat shock cognate 71 kDa protein	HSP7C_MOUSE	57	129.557	2.29557	Nb	Control	NaN	NaN	NaN
Hp / Control	Q6ZWU9	Q6ZWU9	1.05842	1.05842	0.000390209	0.00106976	12	Q6ZWU9	Rps27	Small ribosomal subunit protein eS27	RS27_MOUSE	3	108.265	2.08265	Hp	Control	NaN	NaN	NaN
Nb / Control	Q8VC65	Q8VC65	-0.529062	0.529062	0.000390151	0.00106976	12	Q8VC65	Nrm	Nurim	NRM_MOUSE	6	-30.6995	0.693005	Nb	Control	NaN	NaN	NaN
Nb / Hp	O35621	O35621	2.50058	2.50058	0.000392038	0.0010726	12	O35621	Pmm1	Phosphomannomutase 1	PMM1_MOUSE	3	465.911	5.65911	Nb	Hp	NaN	NaN	NaN
Nb / Hp	Q8BFR4	Q8BFR4	0.665663	0.665663	0.000391854	0.0010726	12	Q8BFR4	Gns	N-acetylglucosamine-6-sulfatase	GNS_MOUSE	9	58.6297	1.5863	Nb	Hp	NaN	NaN	NaN
Hp / Control	Q9D6U8	Q9D6U8	1.11132	1.11132	0.000392173	0.0010726	12	Q9D6U8	Fam162a	Protein FAM162A	F162A_MOUSE	7	116.043	2.16043	Hp	Control	NaN	NaN	NaN
Nb / Hp	Q9R0H0	Q9R0H0	-0.777379	0.777379	0.00039295	0.00107392	12	Q9R0H0	Acox1	Peroxisomal acyl-coenzyme A oxidase 1	ACOX1_MOUSE	16	-41.6574	0.583426	Nb	Hp	NaN	NaN	NaN
Hp / Control	Q61656	Q61656	1.10793	1.10793	0.000393427	0.00107443	12	Q61656	Ddx5	Probable ATP-dependent RNA helicase DDX5	DDX5_MOUSE	40	115.536	2.15536	Hp	Control	NaN	NaN	NaN
Nb / Hp	Q9TRI1	Q9TRI1	-2.2169	2.2169	0.000394275	0.00107594	12	NaN	TREMBL:Q9TRI1	(Bos taurus) similar to inter-alpha-trypsin inhibitor heavy chain2	NaN	30	-78.4897	0.215103	Nb	Hp	NaN	NaN	NaN
Nb / Hp	Q921L5	Q921L5	1.07819	1.07819	0.000395056	0.00107726	12	Q921L5	Cog2	Conserved oligomeric Golgi complex subunit 2	COG2_MOUSE	2	111.138	2.11138	Nb	Hp	NaN	NaN	NaN
Nb / Hp	Q00651	Q00651	-0.266078	0.266078	0.000396034	0.00107913	12	Q00651	Itga4	Integrin alpha-4	ITA4_MOUSE	25	-16.8423	0.831577	Nb	Hp	NaN	NaN	NaN
Nb / Hp	Q7Z794	Q7Z794	-1.04219	1.04219	0.000396892	0.00108066	12	NaN	SWISS-PROT:Q7Z794	Tax_Id=9606 Gene_Symbol=KRT77 Keratin 77	NaN	9	-51.441	0.48559	Nb	Hp	NaN	NaN	NaN
Nb / Hp	Q3TC33	Q3TC33	-1.01854	1.01854	0.000398503	0.00108424	12	Q3TC33	Ccdc127	Coiled-coil domain-containing protein 127	CC127_MOUSE	5	-50.6383	0.493617	Nb	Hp	NaN	NaN	NaN
Nb / Hp	P30204	P30204	-0.430879	0.430879	0.000399563	0.00108574	12	P30204	Msr1	Macrophage scavenger receptor types I and II	MSRE_MOUSE	8	-25.819	0.74181	Nb	Hp	NaN	NaN	NaN
Nb / Hp	Q8VI84	Q8VI84	-0.554847	0.554847	0.000399948	0.00108574	12	Q8VI84	Noc3l	Nucleolar complex protein 3 homolog	NOC3L_MOUSE	12	-31.9271	0.680729	Nb	Hp	NaN	NaN	NaN
Nb / Hp	Q9CX86	Q9CX86	-1.81975	1.81975	0.000399887	0.00108574	12	Q9CX86	Hnrnpa0	Heterogeneous nuclear ribonucleoprotein A0	ROA0_MOUSE	12	-71.6729	0.283271	Nb	Hp	NaN	NaN	NaN
Nb / Hp	P62843	P62843	0.875527	0.875527	0.000400493	0.00108576	12	P62843	Rps15	Small ribosomal subunit protein uS19	RS15_MOUSE	5	83.4678	1.83468	Nb	Hp	NaN	NaN	NaN
Hp / Control	Q9CQS5	Q9CQS5	1.29862	1.29862	0.000400548	0.00108576	12	Q9CQS5	Riok2	Serine/threonine-protein kinase RIO2	RIOK2_MOUSE	2	145.993	2.45993	Hp	Control	NaN	NaN	NaN
Nb / Hp	Q9R0A0	Q9R0A0	-0.941362	0.941362	0.000401421	0.00108732	12	Q9R0A0	Pex14	Peroxisomal membrane protein PEX14	PEX14_MOUSE	8	-47.9259	0.520741	Nb	Hp	NaN	NaN	NaN
Nb / Hp	Q0VGY8	Q0VGY8	1.44127	1.44127	0.000401788	0.00108751	12	Q0VGY8	Tanc1	Protein TANC1	TANC1_MOUSE	3	171.561	2.71561	Nb	Hp	NaN	NaN	NaN
Nb / Hp	P54823	P54823	1.16911	1.16911	0.000404792	0.00109483	12	P54823	Ddx6	Probable ATP-dependent RNA helicase DDX6	DDX6_MOUSE	16	124.873	2.24873	Nb	Hp	NaN	NaN	NaN
Nb / Hp	Q5F2E7	Q5F2E7	-1.19116	1.19116	0.000405642	0.00109631	12	Q5F2E7	Nufip2	FMR1-interacting protein NUFIP2	NUFP2_MOUSE	7	-56.2049	0.437951	Nb	Hp	NaN	NaN	NaN
Nb / Hp	Q8BSK8	Q8BSK8	0.994464	0.994464	0.000407085	0.0010994	12	Q8BSK8	Rps6kb1	Ribosomal protein S6 kinase beta-1	KS6B1_MOUSE	2	99.2341	1.99234	Nb	Hp	NaN	NaN	NaN
Nb / Hp	Q8BG32	Q8BG32	1.31204	1.31204	0.000407574	0.00109991	12	Q8BG32	Psmd11	26S proteasome non-ATPase regulatory subunit 11	PSD11_MOUSE	26	148.293	2.48293	Nb	Hp	NaN	NaN	NaN
Nb / Hp	Q7TMY8	Q7TMY8	1.33732	1.33732	0.000407926	0.00110005	12	Q7TMY8	Huwe1	E3 ubiquitin-protein ligase HUWE1	HUWE1_MOUSE	38	152.681	2.52681	Nb	Hp	NaN	NaN	NaN
Nb / Hp	Q91VC3	Q91VC3	-0.37428	0.37428	0.000409303	0.00110294	12	Q91VC3	Eif4a3	Eukaryotic initiation factor 4A-III	IF4A3_MOUSE	23	-22.851	0.77149	Nb	Hp	NaN	NaN	NaN
Nb / Hp	P35564	P35564	-0.991141	0.991141	0.000410908	0.00110645	12	P35564	Canx	Calnexin	CALX_MOUSE	42	-49.692	0.50308	Nb	Hp	NaN	NaN	NaN
Nb / Hp	Q3URQ0	Q3URQ0	-0.629338	0.629338	0.000412475	0.00110944	12	Q3URQ0	Tex10	Testis-expressed protein 10	TEX10_MOUSE	19	-35.3527	0.646473	Nb	Hp	NaN	NaN	NaN
Nb / Hp	Q8VI75	Q8VI75	1.54812	1.54812	0.000413232	0.00110944	12	Q8VI75	Ipo4	Importin-4	IPO4_MOUSE	16	192.437	2.92437	Nb	Hp	NaN	NaN	NaN
Nb / Control	Q9EQ80	Q9EQ80	1.33545	1.33545	0.000413094	0.00110944	12	Q9EQ80	Nif3l1	NIF3-like protein 1	NIF3L_MOUSE	12	152.354	2.52354	Nb	Control	NaN	NaN	NaN
Nb / Control	Q9ER00	Q9ER00	-1.17747	1.17747	0.00041314	0.00110944	12	Q9ER00	Stx12	Syntaxin-12	STX12_MOUSE	8	-55.7873	0.442127	Nb	Control	NaN	NaN	NaN
Nb / Control	Q8R050	Q8R050	1.33756	1.33756	0.000415231	0.00111317	12	Q8R050	Gspt1	Eukaryotic peptide chain release factor GTP-binding subunit ERF3A	ERF3A_MOUSE	20	152.723	2.52723	Nb	Control	NaN	NaN	NaN
Nb / Hp	Q9EQ20	Q9EQ20	-0.580731	0.580731	0.000415093	0.00111317	12	Q9EQ20	Aldh6a1	Methylmalonate-semialdehyde/malonate-semialdehyde dehydrogenase [acylating], mitochondrial	MMSA_MOUSE	5	-33.1375	0.668625	Nb	Hp	NaN	NaN	NaN
Nb / Control	Q9CXK8	Q9CXK8	-0.819062	0.819062	0.000416952	0.00111697	12	Q9CXK8	Nip7	60S ribosome subunit biogenesis protein NIP7 homolog	NIP7_MOUSE	8	-43.319	0.56681	Nb	Control	NaN	NaN	NaN
Nb / Hp	P10852	P10852	-0.467559	0.467559	0.000418962	0.00112153	12	P10852	Slc3a2	Amino acid transporter heavy chain SLC3A2	4F2_MOUSE	22	-27.6813	0.723187	Nb	Hp	NaN	NaN	NaN
Hp / Control	O70172	O70172	0.703983	0.703983	0.000422091	0.0011266	12	O70172	Pip4k2a	Phosphatidylinositol 5-phosphate 4-kinase type-2 alpha	PI42A_MOUSE	7	62.8995	1.629	Hp	Control	NaN	NaN	NaN
Hp / Control	Q8BG81	Q8BG81	1.6632	1.6632	0.000421415	0.0011266	12	Q8BG81	Poldip3	Polymerase delta-interacting protein 3	PDIP3_MOUSE	18	216.719	3.16719	Hp	Control	NaN	NaN	NaN
Nb / Hp	Q8BH79	Q8BH79	-1.26251	1.26251	0.000421482	0.0011266	12	Q8BH79	Ano10	Anoctamin-10	ANO10_MOUSE	7	-58.3183	0.416817	Nb	Hp	NaN	NaN	NaN
Hp / Control	Q9D0B0	Q9D0B0	2.16064	2.16064	0.000421985	0.0011266	12	Q9D0B0	Srsf9	Serine/arginine-rich splicing factor 9	SRSF9_MOUSE	11	347.114	4.47114	Hp	Control	NaN	NaN	NaN
Nb / Control	P58252	P58252	1.37042	1.37042	0.000423666	0.0011295	12	P58252	Eef2	Elongation factor 2	EF2_MOUSE	64	158.545	2.58545	Nb	Control	NaN	NaN	NaN
Nb / Control	Q91YE6	Q91YE6	1.1491	1.1491	0.000423795	0.0011295	12	Q91YE6	Ipo9	Importin-9	IPO9_MOUSE	20	121.775	2.21775	Nb	Control	NaN	NaN	NaN
Nb / Hp	Q8BX10	Q8BX10	-0.835878	0.835878	0.000424855	0.0011315	12	Q8BX10	Pgam5	Serine/threonine-protein phosphatase PGAM5, mitochondrial	PGAM5_MOUSE	11	-43.9758	0.560242	Nb	Hp	NaN	NaN	NaN
Nb / Control	Q5F2E8	Q5F2E8	1.48519	1.48519	0.000425705	0.00113294	12	Q5F2E8	Taok1	Serine/threonine-protein kinase TAO1	TAOK1_MOUSE	3	179.953	2.79953	Nb	Control	NaN	NaN	NaN
Hp / Control	P53798	P53798	1.44678	1.44678	0.000426334	0.00113379	12	P53798	Fdft1	Squalene synthase	FDFT_MOUSE	14	172.598	2.72598	Hp	Control	NaN	NaN	NaN
Nb / Hp	Q9Z1B5	Q9Z1B5	1.41254	1.41254	0.000426661	0.00113383	12	Q9Z1B5	Mad2l1	Mitotic spindle assembly checkpoint protein MAD2A	MD2L1_MOUSE	7	166.206	2.66206	Nb	Hp	NaN	NaN	NaN
Hp / Control	P70333	P70333	1.39911	1.39911	0.000427646	0.00113562	12	P70333	Hnrnph2	Heterogeneous nuclear ribonucleoprotein H2	HNRH2_MOUSE	7	163.739	2.63739	Hp	Control	NaN	NaN	NaN
Nb / Control	Q6PAC3	Q6PAC3	-1.24687	1.24687	0.000429339	0.00113846	12	Q6PAC3	Dcaf13	DDB1- and CUL4-associated factor 13	DCA13_MOUSE	12	-57.864	0.42136	Nb	Control	NaN	NaN	NaN
Nb / Hp	Q7JJ13	Q7JJ13	-1.73266	1.73266	0.000429317	0.00113846	12	Q7JJ13	Brd2	Bromodomain-containing protein 2	BRD2_MOUSE	10	-69.9103	0.300897	Nb	Hp	NaN	NaN	NaN
Hp / Control	Q8BHS3	Q8BHS3	0.85528	0.85528	0.000430485	0.00114068	12	Q8BHS3	Rbm22	Pre-mRNA-splicing factor RBM22	RBM22_MOUSE	13	80.911	1.80911	Hp	Control	NaN	NaN	NaN
Nb / Control	Q9CQ85	Q9CQ85	-1.17418	1.17418	0.000433083	0.00114673	12	Q9CQ85	Timm22	Mitochondrial import inner membrane translocase subunit Tim22	TIM22_MOUSE	4	-55.6864	0.443136	Nb	Control	NaN	NaN	NaN
Nb / Hp	P49138	P49138	1.46774	1.46774	0.000435389	0.00115097	12	P49138	Mapkapk2	MAP kinase-activated protein kinase 2	MAPK2_MOUSE	8	176.589	2.76589	Nb	Hp	NaN	NaN	NaN
Nb / Hp	Q3UW53	Q3UW53	1.52341	1.52341	0.000435316	0.00115097	12	Q3UW53	Niban1	Protein Niban 1	NIBA1_MOUSE	6	187.47	2.8747	Nb	Hp	NaN	NaN	NaN
Nb / Control	Q61334	Q61334	-1.34899	1.34899	0.000435881	0.00115097	12	Q61334	Bcap29	B-cell receptor-associated protein 29	BAP29_MOUSE	12	-60.7433	0.392567	Nb	Control	NaN	NaN	NaN
Nb / Control	Q99JR1	Q99JR1	-0.911781	0.911781	0.000435945	0.00115097	12	Q99JR1	Sfxn1	Sideroflexin-1	SFXN1_MOUSE	15	-46.8471	0.531529	Nb	Control	NaN	NaN	NaN
Nb / Control	P14733	P14733	-1.04267	1.04267	0.000437002	0.00115162	12	P14733	Lmnb1	Lamin-B1	LMNB1_MOUSE	66	-51.4573	0.485427	Nb	Control	NaN	NaN	NaN
Nb / Hp	Q8BJ48	Q8BJ48	-0.625441	0.625441	0.000437115	0.00115162	12	Q8BJ48	Nagpa	N-acetylglucosamine-1-phosphodiester alpha-N-acetylglucosaminidase	NAGPA_MOUSE	15	-35.1779	0.648221	Nb	Hp	NaN	NaN	NaN
Nb / Hp	Q9JJI6	Q9JJI6	-0.879366	0.879366	0.000437136	0.00115162	12	Q9JJI6	Pigo	GPI ethanolamine phosphate transferase 3	PIGO_MOUSE	6	-45.6394	0.543606	Nb	Hp	NaN	NaN	NaN
Nb / Control	Q6PCM1	Q6PCM1	-0.734709	0.734709	0.000437952	0.00115294	12	Q6PCM1	Kdm3a	Lysine-specific demethylase 3A	KDM3A_MOUSE	2	-39.9061	0.600939	Nb	Control	NaN	NaN	NaN
Nb / Hp	P12382	P12382	2.18652	2.18652	0.000439032	0.00115412	12	P12382	Pfkl	ATP-dependent 6-phosphofructokinase, liver type	PFKAL_MOUSE	20	355.205	4.55205	Nb	Hp	NaN	NaN	NaN
Nb / Hp	Q9Z1Q2	Q9Z1Q2	-1.10089	1.10089	0.000438737	0.00115412	12	Q9Z1Q2	Abhd16a	Phosphatidylserine lipase ABHD16A	ABHGA_MOUSE	14	-53.3772	0.466228	Nb	Hp	NaN	NaN	NaN
Nb / Hp	Q8K4Q8	Q8K4Q8	-0.824208	0.824208	0.000439605	0.00115479	12	Q8K4Q8	Colec12	Collectin-12	COL12_MOUSE	22	-43.5208	0.564792	Nb	Hp	NaN	NaN	NaN
Nb / Control	P28800	P28800	-0.897063	0.897063	0.000440254	0.00115564	12	NaN	SWISS-PROT:P28800	(Bos taurus) Alpha-2-antiplasmin precursor	NaN	13	-46.3021	0.536979	Nb	Control	NaN	NaN	NaN
Nb / Control	P61982	P61982	1.2948	1.2948	0.000441193	0.00115564	12	P61982	Ywhag	14-3-3 protein gamma	1433G_MOUSE	12	145.343	2.45343	Nb	Control	NaN	NaN	NaN
Nb / Hp	Q3TIU4	Q3TIU4	1.35126	1.35126	0.000440969	0.00115564	12	Q3TIU4	Pde12	2',5'-phosphodiesterase 12	PDE12_MOUSE	9	155.134	2.55134	Nb	Hp	NaN	NaN	NaN
Nb / Control	Q8BHS3	Q8BHS3	-0.393349	0.393349	0.000440684	0.00115564	12	Q8BHS3	Rbm22	Pre-mRNA-splicing factor RBM22	RBM22_MOUSE	13	-23.864	0.76136	Nb	Control	NaN	NaN	NaN
Nb / Hp	O88952	O88952	-1.63086	1.63086	0.000443793	0.00115847	12	O88952	Lin7c	Protein lin-7 homolog C	LIN7C_MOUSE	3	-67.7103	0.322897	Nb	Hp	NaN	NaN	NaN
Hp / Control	P60904	P60904	1.23043	1.23043	0.000444394	0.00115847	12	P60904	Dnajc5	DnaJ homolog subfamily C member 5	DNJC5_MOUSE	3	134.636	2.34636	Hp	Control	NaN	NaN	NaN
Nb / Control	P97820	P97820	1.82251	1.82251	0.000444131	0.00115847	12	P97820	Map4k4	Mitogen-activated protein kinase kinase kinase kinase 4	M4K4_MOUSE	4	253.697	3.53697	Nb	Control	NaN	NaN	NaN
Nb / Hp	Q01853	Q01853	0.619955	0.619955	0.000443352	0.00115847	12	Q01853	Vcp	Transitional endoplasmic reticulum ATPase	TERA_MOUSE	64	53.6828	1.53683	Nb	Hp	NaN	NaN	NaN
Nb / Hp	Q5SUR0	Q5SUR0	1.92931	1.92931	0.000444374	0.00115847	12	Q5SUR0	Pfas	Phosphoribosylformylglycinamidine synthase	PUR4_MOUSE	26	280.873	3.80873	Nb	Hp	NaN	NaN	NaN
Nb / Hp	Q8R1K1	Q8R1K1	-1.42073	1.42073	0.000444118	0.00115847	12	Q8R1K1	Ubac2	Ubiquitin-associated domain-containing protein 2	UBAC2_MOUSE	6	-62.6476	0.373524	Nb	Hp	NaN	NaN	NaN
Nb / Control	Q91WD5	Q91WD5	-0.372464	0.372464	0.000445084	0.00115847	12	Q91WD5	Ndufs2	NADH dehydrogenase [ubiquinone] iron-sulfur protein 2, mitochondrial	NDUS2_MOUSE	23	-22.7538	0.772462	Nb	Control	NaN	NaN	NaN
Nb / Hp	Q99JF5	Q99JF5	2.38044	2.38044	0.000445127	0.00115847	12	Q99JF5	Mvd	Diphosphomevalonate decarboxylase	MVD1_MOUSE	9	420.697	5.20697	Nb	Hp	NaN	NaN	NaN
Nb / Control	Q9CY64	Q9CY64	1.69863	1.69863	0.000444918	0.00115847	12	Q9CY64	Blvra	Biliverdin reductase A	BIEA_MOUSE	17	224.592	3.24592	Nb	Control	NaN	NaN	NaN
Nb / Control	ENSEMBL:ENSBTAP00000034412	ENSEMBL:ENSBTAP00000034412	-3.02786	3.02786	0.000448296	0.00116391	12	NaN	(Bos	taurus) similar to C4b-binding protein alpha chain	NaN	12	-87.7391	0.122609	Nb	Control	NaN	NaN	NaN
Nb / Hp	P97450	P97450	-1.73298	1.73298	0.000448492	0.00116391	12	P97450	Atp5pf	ATP synthase-coupling factor 6, mitochondrial	ATP5J_MOUSE	2	-69.9169	0.300831	Nb	Hp	NaN	NaN	NaN
Nb / Hp	Q86YZ3	Q86YZ3	-0.912724	0.912724	0.000448462	0.00116391	12	NaN	SWISS-PROT:Q86YZ3	Tax_Id=9606 Gene_Symbol=HRNR Hornerin	NaN	16	-46.8819	0.531181	Nb	Hp	NaN	NaN	NaN
Nb / Hp	Q91W50	Q91W50	0.976514	0.976514	0.000448178	0.00116391	12	Q91W50	Csde1	Cold shock domain-containing protein E1	CSDE1_MOUSE	26	96.7705	1.96771	Nb	Hp	NaN	NaN	NaN
Nb / Hp	Q9JIX8	Q9JIX8	-0.664358	0.664358	0.000452142	0.00117255	12	Q9JIX8	Acin1	Apoptotic chromatin condensation inducer in the nucleus	ACINU_MOUSE	20	-36.903	0.63097	Nb	Hp	NaN	NaN	NaN
Nb / Hp	Q9CXF4	Q9CXF4	1.04148	1.04148	0.000452545	0.00117277	12	Q9CXF4	Tbc1d15	TBC1 domain family member 15	TBC15_MOUSE	12	105.834	2.05834	Nb	Hp	NaN	NaN	NaN
Nb / Hp	E9Q5C9	E9Q5C9	-1.93236	1.93236	0.000454603	0.00117626	12	E9Q5C9	Nolc1	Nucleolar and coiled-body phosphoprotein 1	NOLC1_MOUSE	25	-73.8	0.262	Nb	Hp	NaN	NaN	NaN
Nb / Hp	Q7TMF3	Q7TMF3	-1.25989	1.25989	0.000454859	0.00117626	12	Q7TMF3	Ndufa12	NADH dehydrogenase [ubiquinone] 1 alpha subcomplex subunit 12	NDUAC_MOUSE	10	-58.2425	0.417575	Nb	Hp	NaN	NaN	NaN
Nb / Hp	Q9D3D9	Q9D3D9	-1.01272	1.01272	0.000454809	0.00117626	12	Q9D3D9	Atp5f1d	ATP synthase subunit delta, mitochondrial	ATPD_MOUSE	2	-50.4388	0.495612	Nb	Hp	NaN	NaN	NaN
Nb / Control	Q8K183	Q8K183	1.72187	1.72187	0.000456229	0.00117897	12	Q8K183	Pdxk	Pyridoxal kinase	PDXK_MOUSE	10	229.863	3.29863	Nb	Control	NaN	NaN	NaN
Nb / Hp	Q64012	Q64012	-1.3054	1.3054	0.000456969	0.00118005	12	Q64012	Raly	RNA-binding protein Raly	RALY_MOUSE	26	-59.5391	0.404609	Nb	Hp	NaN	NaN	NaN
Nb / Hp	Q99LP6	Q99LP6	-0.645968	0.645968	0.000457537	0.00118068	12	Q99LP6	Grpel1	GrpE protein homolog 1, mitochondrial	GRPE1_MOUSE	10	-36.0936	0.639064	Nb	Hp	NaN	NaN	NaN
Nb / Hp	Q06138	Q06138	2.17059	2.17059	0.000459119	0.00118392	12	Q06138	Cab39	Calcium-binding protein 39	CAB39_MOUSE	12	350.207	4.50207	Nb	Hp	NaN	NaN	NaN
Nb / Hp	Q8CFE2	Q8CFE2	1.77196	1.77196	0.000459505	0.00118408	12	Q8CFE2	Hpf1	Histone PARylation factor 1	HPF1_MOUSE	10	241.517	3.41517	Nb	Hp	NaN	NaN	NaN
Hp / Control	Q99PG2	Q99PG2	0.528439	0.528439	0.000460578	0.00118601	12	Q99PG2	Ogfr	Opioid growth factor receptor	OGFR_MOUSE	2	44.2367	1.44237	Hp	Control	NaN	NaN	NaN
Nb / Control	Q06138	Q06138	2.06424	2.06424	0.000463028	0.00119148	12	Q06138	Cab39	Calcium-binding protein 39	CAB39_MOUSE	12	318.213	4.18213	Nb	Control	NaN	NaN	NaN
Nb / Hp	P27601	P27601	-0.404344	0.404344	0.000463551	0.00119199	12	P27601	Gna13	Guanine nucleotide-binding protein subunit alpha-13	GNA13_MOUSE	14	-24.442	0.75558	Nb	Hp	NaN	NaN	NaN
Nb / Control	Q8BR70	Q8BR70	-0.609542	0.609542	0.000464649	0.00119397	12	Q8BR70	Yipf6	Protein YIPF6	YIPF6_MOUSE	2	-34.4595	0.655405	Nb	Control	NaN	NaN	NaN
Nb / Control	Q9D2Y4	Q9D2Y4	1.50255	1.50255	0.000467814	0.00120126	12	Q9D2Y4	Mlkl	Mixed lineage kinase domain-like protein	MLKL_MOUSE	3	183.343	2.83343	Nb	Control	NaN	NaN	NaN
Nb / Hp	P81117	P81117	-0.824822	0.824822	0.000469861	0.00120567	12	P81117	Nucb2	Nucleobindin-2	NUCB2_MOUSE	3	-43.5448	0.564552	Nb	Hp	NaN	NaN	NaN
Nb / Hp	Q60597	Q60597	-0.07966	0.07966	0.000471116	0.00120804	12	Q60597	Ogdh	2-oxoglutarate dehydrogenase complex component E1	ODO1_MOUSE	35	-5.37194	0.946281	Nb	Hp	NaN	NaN	NaN
Nb / Control	Q61818	Q61818	-1.71888	1.71888	0.000473327	0.00121286	12	Q61818	Rai1	Retinoic acid-induced protein 1	RAI1_MOUSE	2	-69.6216	0.303784	Nb	Control	NaN	NaN	NaN
Nb / Control	P99026	P99026	1.90647	1.90647	0.000474389	0.00121473	12	P99026	Psmb4	Proteasome subunit beta type-4	PSB4_MOUSE	8	274.892	3.74892	Nb	Control	NaN	NaN	NaN
Nb / Hp	P57780	P57780	1.80987	1.80987	0.000474865	0.0012151	12	P57780	Actn4	Alpha-actinin-4	ACTN4_MOUSE	40	250.611	3.50611	Nb	Hp	NaN	NaN	NaN
Nb / Hp	Q6PAR5	Q6PAR5	1.06516	1.06516	0.000475534	0.00121596	12	Q6PAR5	Gapvd1	GTPase-activating protein and VPS9 domain-containing protein 1	GAPD1_MOUSE	26	109.24	2.0924	Nb	Hp	NaN	NaN	NaN
Nb / Hp	Q9JI99	Q9JI99	-1.18289	1.18289	0.000477201	0.00121937	12	Q9JI99	Sgpp1	Sphingosine-1-phosphate phosphatase 1	SGPP1_MOUSE	2	-55.9532	0.440468	Nb	Hp	NaN	NaN	NaN
Nb / Hp	P01044-1	P01044-1	-2.4964	2.4964	0.000478042	0.00122066	12	NaN	SWISS-PROT:P01044-1	(Bos taurus) Isoform HMW of Kininogen-1 precursor	NaN	16	-82.2781	0.177219	Nb	Hp	NaN	NaN	NaN
Nb / Control	Q91YI4	Q91YI4	2.07717	2.07717	0.000479724	0.0012241	12	Q91YI4	Arrb2	Beta-arrestin-2	ARRB2_MOUSE	10	321.979	4.21979	Nb	Control	NaN	NaN	NaN
Nb / Control	Q8BRH0	Q8BRH0	-0.986955	0.986955	0.000481124	0.00122681	12	Q8BRH0	Tmtc3	Protein O-mannosyl-transferase TMTC3	TMTC3_MOUSE	8	-49.5458	0.504542	Nb	Control	NaN	NaN	NaN
Nb / Hp	P06801	P06801	2.57341	2.57341	0.000481995	0.00122818	12	P06801	Me1	NADP-dependent malic enzyme	MAOX_MOUSE	5	495.216	5.95216	Nb	Hp	NaN	NaN	NaN
Hp / Control	P10605	P10605	-0.616223	0.616223	0.000482577	0.0012288	12	P10605	Ctsb	Cathepsin B	CATB_MOUSE	18	-34.7624	0.652376	Hp	Control	NaN	NaN	NaN
Hp / Control	Q8R242	Q8R242	-2.30761	2.30761	0.000483442	0.00123015	12	Q8R242	Ctbs	Di-N-acetylchitobiase	DIAC_MOUSE	4	-79.8006	0.201994	Hp	Control	NaN	NaN	NaN
Nb / Control	Q8R2U0	Q8R2U0	-0.536787	0.536787	0.000485355	0.00123416	12	Q8R2U0	Seh1l	Nucleoporin SEH1	SEH1_MOUSE	9	-31.0696	0.689304	Nb	Control	NaN	NaN	NaN
Nb / Hp	P63101	P63101	2.21831	2.21831	0.000486398	0.00123509	12	P63101	Ywhaz	14-3-3 protein zeta/delta	1433Z_MOUSE	21	365.349	4.65349	Nb	Hp	NaN	NaN	NaN
Nb / Control	Q3U2C5	Q3U2C5	-0.67886	0.67886	0.000486288	0.00123509	12	Q3U2C5	Rnf149	E3 ubiquitin-protein ligase RNF149	RN149_MOUSE	7	-37.5341	0.624659	Nb	Control	NaN	NaN	NaN
Nb / Hp	Q8K215	Q8K215	-0.896092	0.896092	0.000487323	0.00123658	12	Q8K215	Lyrm4	LYR motif-containing protein 4	LYRM4_MOUSE	4	-46.266	0.53734	Nb	Hp	NaN	NaN	NaN
Nb / Hp	Q9EPQ8	Q9EPQ8	-0.932479	0.932479	0.00048837	0.00123838	12	Q9EPQ8	Tcf20	Transcription factor 20	TCF20_MOUSE	3	-47.6043	0.523957	Nb	Hp	NaN	NaN	NaN
Nb / Hp	P27641	P27641	0.876272	0.876272	0.000489347	0.00124	12	P27641	Xrcc5	X-ray repair cross-complementing protein 5	XRCC5_MOUSE	8	83.5625	1.83563	Nb	Hp	NaN	NaN	NaN
Nb / Control	O70251	O70251	1.23643	1.23643	0.000490193	0.00124056	12	O70251	Eef1b	Elongation factor 1-beta	EF1B_MOUSE	6	135.615	2.35615	Nb	Control	NaN	NaN	NaN
Nb / Hp	Q8BJS4	Q8BJS4	-0.787297	0.787297	0.000490248	0.00124056	12	Q8BJS4	Sun2	SUN domain-containing protein 2	SUN2_MOUSE	16	-42.0571	0.579429	Nb	Hp	NaN	NaN	NaN
Hp / Control	Q60692	Q60692	-1.02452	1.02452	0.000490912	0.00124138	12	Q60692	Psmb6	Proteasome subunit beta type-6	PSB6_MOUSE	6	-50.8426	0.491574	Hp	Control	NaN	NaN	NaN
Nb / Hp	Q8K2Q7	Q8K2Q7	1.90188	1.90188	0.000491441	0.00124186	12	Q8K2Q7	Brox	BRO1 domain-containing protein BROX	BROX_MOUSE	5	273.699	3.73699	Nb	Hp	NaN	NaN	NaN
Nb / Control	Q60692	Q60692	1.47033	1.47033	0.000493868	0.00124713	12	Q60692	Psmb6	Proteasome subunit beta type-6	PSB6_MOUSE	6	177.086	2.77086	Nb	Control	NaN	NaN	NaN
Nb / Hp	Q8BSY0	Q8BSY0	-1.24815	1.24815	0.000494688	0.00124834	12	Q8BSY0	Asph	Aspartyl/asparaginyl beta-hydroxylase	ASPH_MOUSE	35	-57.9013	0.420987	Nb	Hp	NaN	NaN	NaN
Nb / Hp	Q9Z1X4	Q9Z1X4	-0.995509	0.995509	0.00049507	0.00124844	12	Q9Z1X4	Ilf3	Interleukin enhancer-binding factor 3	ILF3_MOUSE	23	-49.8441	0.501559	Nb	Hp	NaN	NaN	NaN
Nb / Hp	P18052	P18052	-0.562962	0.562962	0.000497401	0.00125345	12	P18052	Ptpra	Receptor-type tyrosine-protein phosphatase alpha	PTPRA_MOUSE	19	-32.3089	0.676911	Nb	Hp	NaN	NaN	NaN
Nb / Control	Q8BHC4	Q8BHC4	-0.363387	0.363387	0.000498395	0.00125509	12	Q8BHC4	Dcakd	Dephospho-CoA kinase domain-containing protein	DCAKD_MOUSE	12	-22.2663	0.777337	Nb	Control	NaN	NaN	NaN
Nb / Hp	Q8R3C0	Q8R3C0	1.97733	1.97733	0.00050295	0.00126521	12	Q8R3C0	Mcmbp	Mini-chromosome maintenance complex-binding protein	MCMBP_MOUSE	13	293.762	3.93762	Nb	Hp	NaN	NaN	NaN
Nb / Hp	Q9D1H6	Q9D1H6	-1.81949	1.81949	0.000503105	0.00126521	12	Q9D1H6	Ndufaf4	NADH dehydrogenase [ubiquinone] 1 alpha subcomplex assembly factor 4	NDUF4_MOUSE	9	-71.6678	0.283322	Nb	Hp	NaN	NaN	NaN
Nb / Control	P70168	P70168	1.05866	1.05866	0.000503599	0.00126558	12	P70168	Kpnb1	Importin subunit beta-1	IMB1_MOUSE	34	108.299	2.08299	Nb	Control	NaN	NaN	NaN
Nb / Hp	P50171	P50171	-0.34106	0.34106	0.000505432	0.00126586	12	P50171	Hsd17b8	(3R)-3-hydroxyacyl-CoA dehydrogenase	DHB8_MOUSE	7	-21.0539	0.789461	Nb	Hp	NaN	NaN	NaN
Nb / Hp	Q14AI0	Q14AI0	0.74896	0.74896	0.000504727	0.00126586	12	Q14AI0	DSCC1	Sister chromatid cohesion protein DCC1	DCC1_MOUSE	4	68.058	1.68058	Nb	Hp	NaN	NaN	NaN
Nb / Hp	Q80UP5	Q80UP5	1.26539	1.26539	0.000505443	0.00126586	12	Q80UP5	Ankrd13a	Ankyrin repeat domain-containing protein 13A	AN13A_MOUSE	2	140.392	2.40392	Nb	Hp	NaN	NaN	NaN
Hp / Control	Q8K0C9	Q8K0C9	-0.795466	0.795466	0.000505242	0.00126586	12	Q8K0C9	Gmds	GDP-mannose 4,6 dehydratase	GMDS_MOUSE	7	-42.3843	0.576157	Hp	Control	NaN	NaN	NaN
Nb / Hp	Q9JJZ4	Q9JJZ4	-0.984339	0.984339	0.000505297	0.00126586	12	Q9JJZ4	Ube2j1	Ubiquitin-conjugating enzyme E2 J1	UB2J1_MOUSE	4	-49.4543	0.505457	Nb	Hp	NaN	NaN	NaN
Nb / Hp	Q3UE37	Q3UE37	1.7384	1.7384	0.000506108	0.00126642	12	Q3UE37	Ube2z	Ubiquitin-conjugating enzyme E2 Z	UBE2Z_MOUSE	3	233.664	3.33664	Nb	Hp	NaN	NaN	NaN
Nb / Hp	Q9D9V3	Q9D9V3	1.3174	1.3174	0.000506359	0.00126642	12	Q9D9V3	Echdc1	Ethylmalonyl-CoA decarboxylase	ECHD1_MOUSE	3	149.217	2.49217	Nb	Hp	NaN	NaN	NaN
Nb / Hp	Q9DC48	Q9DC48	-0.925185	0.925185	0.000507377	0.0012681	12	Q9DC48	Cdc40	Pre-mRNA-processing factor 17	PRP17_MOUSE	11	-47.3387	0.526613	Nb	Hp	NaN	NaN	NaN
Hp / Control	P28798	P28798	1.85724	1.85724	0.000510063	0.00127394	12	P28798	Grn	Progranulin	GRN_MOUSE	10	262.314	3.62314	Hp	Control	NaN	NaN	NaN
Nb / Hp	O09117	O09117	-0.949963	0.949963	0.000511524	0.00127671	12	O09117	Sypl1	Synaptophysin-like protein 1	SYPL1_MOUSE	2	-48.2354	0.517646	Nb	Hp	NaN	NaN	NaN
Nb / Hp	Q9CZD3	Q9CZD3	1.31859	1.31859	0.000512959	0.00127942	12	Q9CZD3	Gars1	Glycine--tRNA ligase	GARS_MOUSE	31	149.423	2.49423	Nb	Hp	NaN	NaN	NaN
Nb / Hp	Q9CQI3	Q9CQI3	2.17811	2.17811	0.00051347	0.00127982	12	Q9CQI3	Gmfb	Glia maturation factor beta	GMFB_MOUSE	5	352.56	4.5256	Nb	Hp	NaN	NaN	NaN
Nb / Hp	P35279	P35279	-0.694643	0.694643	0.000518655	0.00129098	12	P35279	Rab6a	Ras-related protein Rab-6A	RAB6A_MOUSE	15	-38.2138	0.617862	Nb	Hp	NaN	NaN	NaN
Nb / Control	Q8BZR9	Q8BZR9	-0.336079	0.336079	0.000518385	0.00129098	12	Q8BZR9	Ncbp3	Nuclear cap-binding protein subunit 3	NCBP3_MOUSE	7	-20.7808	0.792192	Nb	Control	NaN	NaN	NaN
Nb / Hp	P41361	P41361	-2.5175	2.5175	0.000519096	0.0012912	12	NaN	SWISS-PROT:P41361	(Bos taurus) Antithrombin-III precursor	NaN	17	-82.5355	0.174645	Nb	Hp	NaN	NaN	NaN
Nb / Hp	P56477	P56477	1.32987	1.32987	0.000520249	0.00129277	12	P56477	Irf5	Interferon regulatory factor 5	IRF5_MOUSE	11	151.38	2.5138	Nb	Hp	NaN	NaN	NaN
Nb / Hp	Q8K368	Q8K368	1.40008	1.40008	0.000520434	0.00129277	12	Q8K368	Fanci	Fanconi anemia group I protein homolog	FANCI_MOUSE	8	163.916	2.63916	Nb	Hp	NaN	NaN	NaN
Nb / Hp	Q8VDP4	Q8VDP4	-1.31628	1.31628	0.000521705	0.00129417	12	Q8VDP4	Ccar2	Cell cycle and apoptosis regulator protein 2	CCAR2_MOUSE	18	-59.8431	0.401569	Nb	Hp	NaN	NaN	NaN
Nb / Hp	Q9CWU2	Q9CWU2	-0.950638	0.950638	0.000521472	0.00129417	12	Q9CWU2	Zdhhc13	Palmitoyltransferase ZDHHC13	ZDH13_MOUSE	6	-48.2597	0.517403	Nb	Hp	NaN	NaN	NaN
Nb / Hp	Q9Z1M8	Q9Z1M8	-1.09187	1.09187	0.000527022	0.00130647	12	Q9Z1M8	Ik	Protein Red	RED_MOUSE	15	-53.0847	0.469153	Nb	Hp	NaN	NaN	NaN
Nb / Control	P11680	P11680	-0.892557	0.892557	0.000529316	0.00130993	12	P11680	Cfp	Properdin	PROP_MOUSE	3	-46.1341	0.538659	Nb	Control	NaN	NaN	NaN
Nb / Hp	Q9DC33	Q9DC33	-1.91574	1.91574	0.000529446	0.00130993	12	Q9DC33	Hmg20a	High mobility group protein 20A	HM20A_MOUSE	3	-73.4963	0.265037	Nb	Hp	NaN	NaN	NaN
Nb / Hp	Q9QYC7	Q9QYC7	-1.27498	1.27498	0.000529494	0.00130993	12	Q9QYC7	Ggcx	Vitamin K-dependent gamma-carboxylase	VKGC_MOUSE	6	-58.6769	0.413231	Nb	Hp	NaN	NaN	NaN
Nb / Hp	Q3TKT4	Q3TKT4	-0.521907	0.521907	0.000530723	0.00131209	12	Q3TKT4	Smarca4	Transcription activator BRG1	SMCA4_MOUSE	39	-30.3549	0.696451	Nb	Hp	NaN	NaN	NaN
Nb / Control	P09528	P09528	1.65584	1.65584	0.000531877	0.00131316	12	P09528	Fth1	Ferritin heavy chain	FRIH_MOUSE	8	215.108	3.15108	Nb	Control	NaN	NaN	NaN
Nb / Hp	Q9WTP7	Q9WTP7	-0.113067	0.113067	0.000531621	0.00131316	12	Q9WTP7	Ak3	GTP:AMP phosphotransferase AK3, mitochondrial	KAD3_MOUSE	12	-7.538	0.92462	Nb	Hp	NaN	NaN	NaN
Nb / Hp	A2AB59	A2AB59	1.93716	1.93716	0.000533186	0.00131462	12	A2AB59	Arhgap27	Rho GTPase-activating protein 27	RHG27_MOUSE	2	282.952	3.82952	Nb	Hp	NaN	NaN	NaN
Nb / Hp	Q8VDW0	Q8VDW0	1.1822	1.1822	0.000533028	0.00131462	12	Q8VDW0	Ddx39a	ATP-dependent RNA helicase DDX39A	DX39A_MOUSE	11	126.923	2.26923	Nb	Hp	NaN	NaN	NaN
Nb / Control	Q5SV80	Q5SV80	-0.513919	0.513919	0.000533577	0.00131469	12	Q5SV80	Myo19	Unconventional myosin-XIX	MYO19_MOUSE	5	-29.9682	0.700318	Nb	Control	NaN	NaN	NaN
Nb / Control	Q80YV2	Q80YV2	-0.902471	0.902471	0.000534436	0.00131504	12	Q80YV2	Zc3hc1	Zinc finger C3HC-type protein 1	ZC3C1_MOUSE	12	-46.503	0.53497	Nb	Control	NaN	NaN	NaN
Nb / Control	Q9TRI1	Q9TRI1	-0.570779	0.570779	0.00053432	0.00131504	12	NaN	TREMBL:Q9TRI1	(Bos taurus) similar to inter-alpha-trypsin inhibitor heavy chain2	NaN	30	-32.6747	0.673253	Nb	Control	NaN	NaN	NaN
Nb / Hp	P47199	P47199	2.41896	2.41896	0.00053602	0.00131539	12	P47199	Cryz	Quinone oxidoreductase	QOR_MOUSE	6	434.784	5.34784	Nb	Hp	NaN	NaN	NaN
Hp / Control	Q3UMB9	Q3UMB9	-0.839978	0.839978	0.000535346	0.00131539	12	Q3UMB9	Washc4	WASH complex subunit 4	WASC4_MOUSE	11	-44.1348	0.558652	Hp	Control	NaN	NaN	NaN
Nb / Hp	Q8BVE8	Q8BVE8	-0.653043	0.653043	0.000535521	0.00131539	12	Q8BVE8	Nsd2	Histone-lysine N-methyltransferase NSD2	NSD2_MOUSE	14	-36.4063	0.635937	Nb	Hp	NaN	NaN	NaN
Nb / Hp	Q9CQQ7	Q9CQQ7	-0.986249	0.986249	0.000535742	0.00131539	12	Q9CQQ7	Atp5pb	ATP synthase F(0) complex subunit B1, mitochondrial	AT5F1_MOUSE	21	-49.5211	0.504789	Nb	Hp	NaN	NaN	NaN
Nb / Hp	Q3KNM2	Q3KNM2	-1.06958	1.06958	0.000536908	0.00131635	12	Q3KNM2	Marchf5	E3 ubiquitin-protein ligase MARCHF5	MARH5_MOUSE	6	-52.3541	0.476459	Nb	Hp	NaN	NaN	NaN
Nb / Control	Q9DCC8	Q9DCC8	-0.625867	0.625867	0.00053749	0.00131635	12	Q9DCC8	Tomm20	Mitochondrial import receptor subunit TOM20 homolog	TOM20_MOUSE	4	-35.197	0.64803	Nb	Control	NaN	NaN	NaN
Nb / Hp	Q9WVL3	Q9WVL3	-0.986834	0.986834	0.000537333	0.00131635	12	Q9WVL3	Slc12a7	Solute carrier family 12 member 7	S12A7_MOUSE	12	-49.5416	0.504584	Nb	Hp	NaN	NaN	NaN
Hp / Control	Q9EST5	Q9EST5	-0.847413	0.847413	0.000539519	0.00132043	12	Q9EST5	Anp32b	Acidic leucine-rich nuclear phosphoprotein 32 family member B	AN32B_MOUSE	8	-44.4219	0.555781	Hp	Control	NaN	NaN	NaN
Nb / Hp	P14576	P14576	1.01474	1.01474	0.000541576	0.00132292	12	P14576	Srp54	Signal recognition particle subunit SRP54	SRP54_MOUSE	15	102.054	2.02054	Nb	Hp	NaN	NaN	NaN
Nb / Control	P28063	P28063	2.05065	2.05065	0.000541902	0.00132292	12	P28063	Psmb8	Proteasome subunit beta type-8	PSB8_MOUSE	10	314.292	4.14292	Nb	Control	NaN	NaN	NaN
Nb / Control	P61164	P61164	0.628745	0.628745	0.000541043	0.00132292	12	P61164	Actr1a	Alpha-centractin	ACTZ_MOUSE	13	54.622	1.54622	Nb	Control	NaN	NaN	NaN
Nb / Control	Q8K310	Q8K310	-0.645494	0.645494	0.000541986	0.00132292	12	Q8K310	Matr3	Matrin-3	MATR3_MOUSE	37	-36.0726	0.639274	Nb	Control	NaN	NaN	NaN
Nb / Hp	Q6PIP5	Q6PIP5	1.70107	1.70107	0.000544155	0.00132733	12	Q6PIP5	Nudcd1	NudC domain-containing protein 1	NUDC1_MOUSE	10	225.142	3.25142	Nb	Hp	NaN	NaN	NaN
Nb / Hp	P52633	P52633	1.43131	1.43131	0.000545652	0.00133009	12	P52633	Stat6	Signal transducer and transcription activator 6	STAT6_MOUSE	14	169.691	2.69691	Nb	Hp	NaN	NaN	NaN
Nb / Hp	Q9CXA2	Q9CXA2	1.62357	1.62357	0.00054653	0.00133135	12	Q9CXA2	L3hypdh	Trans-L-3-hydroxyproline dehydratase	T3HPD_MOUSE	2	208.137	3.08137	Nb	Hp	NaN	NaN	NaN
Nb / Hp	A2AJK6	A2AJK6	-1.31475	1.31475	0.000548246	0.00133364	12	A2AJK6	Chd7	Chromodomain-helicase-DNA-binding protein 7	CHD7_MOUSE	5	-59.8005	0.401995	Nb	Hp	NaN	NaN	NaN
Nb / Control	P53811	P53811	1.7479	1.7479	0.000548051	0.00133364	12	P53811	Pitpnb	Phosphatidylinositol transfer protein beta isoform	PIPNB_MOUSE	7	235.87	3.3587	Nb	Control	NaN	NaN	NaN
Nb / Control	Q99N85	Q99N85	-2.88277	2.88277	0.000548567	0.00133364	12	Q99N85	Mrps18a	Large ribosomal subunit protein mL66	RT18A_MOUSE	4	-86.4418	0.135582	Nb	Control	NaN	NaN	NaN
Nb / Hp	Q62504	Q62504	-1.43073	1.43073	0.000550443	0.00133727	12	Q62504	Spen	Msx2-interacting protein	MINT_MOUSE	6	-62.9057	0.370943	Nb	Hp	NaN	NaN	NaN
Nb / Hp	Q9JHS4	Q9JHS4	-1.16841	1.16841	0.000550792	0.00133727	12	Q9JHS4	Clpx	ATP-dependent Clp protease ATP-binding subunit clpX-like, mitochondrial	CLPX_MOUSE	23	-55.5089	0.444911	Nb	Hp	NaN	NaN	NaN
Nb / Control	O08583	O08583	-1.48259	1.48259	0.000552824	0.00134131	12	O08583	Alyref	THO complex subunit 4	THOC4_MOUSE	9	-64.2155	0.357845	Nb	Control	NaN	NaN	NaN
Nb / Hp	Q9JM90	Q9JM90	1.85625	1.85625	0.000553714	0.00134258	12	Q9JM90	Stap1	Signal-transducing adaptor protein 1	STAP1_MOUSE	2	262.064	3.62064	Nb	Hp	NaN	NaN	NaN
Nb / Hp	Q91VR5	Q91VR5	0.690283	0.690283	0.000554293	0.0013431	12	Q91VR5	Ddx1	ATP-dependent RNA helicase DDX1	DDX1_MOUSE	30	61.3601	1.6136	Nb	Hp	NaN	NaN	NaN
Nb / Control	P48678	P48678	-0.501771	0.501771	0.000556975	0.0013487	12	P48678	Lmna	Prelamin-A/C	LMNA_MOUSE	82	-29.3761	0.706239	Nb	Control	NaN	NaN	NaN
Hp / Control	P63321	P63321	0.759794	0.759794	0.000558981	0.00135266	12	P63321	Rala	Ras-related protein Ral-A	RALA_MOUSE	9	69.3249	1.69325	Hp	Control	NaN	NaN	NaN
Nb / Control	Q3TJZ6	Q3TJZ6	1.15939	1.15939	0.000560792	0.00135413	12	Q3TJZ6	Fam98a	Protein FAM98A	FA98A_MOUSE	7	123.364	2.23364	Nb	Control	NaN	NaN	NaN
Nb / Hp	Q64373	Q64373	-2.56669	2.56669	0.000561069	0.00135413	12	Q64373	Bcl2l1	Bcl-2-like protein 1	B2CL1_MOUSE	2	-83.1208	0.168792	Nb	Hp	NaN	NaN	NaN
Nb / Hp	Q8R5J9	Q8R5J9	-1.0208	1.0208	0.000560728	0.00135413	12	Q8R5J9	Arl6ip5	PRA1 family protein 3	PRAF3_MOUSE	10	-50.7156	0.492844	Nb	Hp	NaN	NaN	NaN
Nb / Hp	Q9EP89	Q9EP89	-0.974616	0.974616	0.000560119	0.00135413	12	Q9EP89	Lactb	Serine beta-lactamase-like protein LACTB, mitochondrial	LACTB_MOUSE	11	-49.1125	0.508875	Nb	Hp	NaN	NaN	NaN
Nb / Control	Q9JI13	Q9JI13	-1.97511	1.97511	0.000563828	0.00135989	12	Q9JI13	Utp3	Something about silencing protein 10	SAS10_MOUSE	7	-74.5649	0.254351	Nb	Control	NaN	NaN	NaN
Nb / Hp	Q91WD5	Q91WD5	-0.851091	0.851091	0.000565754	0.00136363	12	Q91WD5	Ndufs2	NADH dehydrogenase [ubiquinone] iron-sulfur protein 2, mitochondrial	NDUS2_MOUSE	23	-44.5635	0.554365	Nb	Hp	NaN	NaN	NaN
Nb / Hp	P60766	P60766	0.654885	0.654885	0.000566233	0.00136389	12	P60766	Cdc42	Cell division control protein 42 homolog	CDC42_MOUSE	10	57.4491	1.57449	Nb	Hp	NaN	NaN	NaN
Nb / Hp	Q9CWQ0	Q9CWQ0	2.21793	2.21793	0.000568328	0.00136713	12	Q9CWQ0	Dph5	Diphthine methyl ester synthase	DPH5_MOUSE	5	365.224	4.65224	Nb	Hp	NaN	NaN	NaN
Nb / Hp	Q9ER41	Q9ER41	-0.525215	0.525215	0.00056828	0.00136713	12	Q9ER41	Tor1b	Torsin-1B	TOR1B_MOUSE	5	-30.5144	0.694856	Nb	Hp	NaN	NaN	NaN
Nb / Hp	Q8BVL3	Q8BVL3	1.19434	1.19434	0.000569605	0.0013693	12	Q8BVL3	Snx17	Sorting nexin-17	SNX17_MOUSE	5	128.841	2.28841	Nb	Hp	NaN	NaN	NaN
Nb / Hp	Q9QXX4	Q9QXX4	-0.835125	0.835125	0.000570592	0.00137077	12	Q9QXX4	Slc25a13	Electrogenic aspartate/glutamate antiporter SLC25A13, mitochondrial	S2513_MOUSE	26	-43.9465	0.560535	Nb	Hp	NaN	NaN	NaN
Nb / Control	P83887	P83887	1.01944	1.01944	0.000571197	0.00137132	12	P83887	Tubg1	Tubulin gamma-1 chain	TBG1_MOUSE	4	102.713	2.02713	Nb	Control	NaN	NaN	NaN
Nb / Control	Q93092	Q93092	1.45671	1.45671	0.000572721	0.00137408	12	Q93092	Taldo1	Transaldolase	TALDO_MOUSE	25	174.482	2.74482	Nb	Control	NaN	NaN	NaN
Nb / Hp	Q8C6L5	Q8C6L5	-1.02313	1.02313	0.000573648	0.0013745	12	Q8C6L5	Cgas	Cyclic GMP-AMP synthase	CGAS_MOUSE	13	-50.7951	0.492049	Nb	Hp	NaN	NaN	NaN
Nb / Hp	Q8JZU2	Q8JZU2	-0.800116	0.800116	0.000573623	0.0013745	12	Q8JZU2	Slc25a1	Tricarboxylate transport protein, mitochondrial	TXTP_MOUSE	13	-42.5697	0.574303	Nb	Hp	NaN	NaN	NaN
Nb / Hp	P36371	P36371	-1.03378	1.03378	0.000574316	0.0013752	12	P36371	Tap2	Antigen peptide transporter 2	TAP2_MOUSE	10	-51.157	0.48843	Nb	Hp	NaN	NaN	NaN
Nb / Hp	Q80ZM8	Q80ZM8	-1.18222	1.18222	0.000575186	0.00137638	12	Q80ZM8	Crls1	Cardiolipin synthase (CMP-forming)	CRLS1_MOUSE	3	-55.9328	0.440672	Nb	Hp	NaN	NaN	NaN
Nb / Control	D3YXK2	D3YXK2	-0.947721	0.947721	0.000576114	0.0013777	12	D3YXK2	Safb	Scaffold attachment factor B1	SAFB1_MOUSE	23	-48.1549	0.518451	Nb	Control	NaN	NaN	NaN
Nb / Hp	Q80ZV0	Q80ZV0	1.67706	1.67706	0.000578083	0.0013815	12	Q80ZV0	Rnaseh2b	Ribonuclease H2 subunit B	RNH2B_MOUSE	3	219.776	3.19776	Nb	Hp	NaN	NaN	NaN
Hp / Control	Q9D2V8	Q9D2V8	0.568809	0.568809	0.000580046	0.00138529	12	Q9D2V8	Mfsd10	Major facilitator superfamily domain-containing protein 10	MFS10_MOUSE	9	48.3298	1.4833	Hp	Control	NaN	NaN	NaN
Hp / Control	P17095	P17095	-1.1755	1.1755	0.000580754	0.00138607	12	P17095	Hmga1	High mobility group protein HMG-I/HMG-Y	HMGA1_MOUSE	5	-55.7269	0.442731	Hp	Control	NaN	NaN	NaN
Nb / Control	P60867	P60867	1.23875	1.23875	0.000582156	0.00138851	12	P60867	Rps20	Small ribosomal subunit protein uS10	RS20_MOUSE	7	135.993	2.35993	Nb	Control	NaN	NaN	NaN
Nb / Hp	P55302	P55302	-1.8939	1.8939	0.000583304	0.00138853	12	P55302	Lrpap1	Alpha-2-macroglobulin receptor-associated protein	AMRP_MOUSE	19	-73.0921	0.269079	Nb	Hp	NaN	NaN	NaN
Nb / Hp	Q60649	Q60649	-0.924575	0.924575	0.000583177	0.00138853	12	Q60649	Clpb	Mitochondrial disaggregase	CLPB_MOUSE	20	-47.3164	0.526836	Nb	Hp	NaN	NaN	NaN
Nb / Hp	Q9D198	Q9D198	-1.57691	1.57691	0.000583159	0.00138853	12	Q9D198	Syf2	Pre-mRNA-splicing factor SYF2	SYF2_MOUSE	5	-66.4802	0.335198	Nb	Hp	NaN	NaN	NaN
Nb / Control	O08600	O08600	-0.830699	0.830699	0.000585867	0.00139191	12	O08600	Endog	Endonuclease G, mitochondrial	NUCG_MOUSE	8	-43.7743	0.562257	Nb	Control	NaN	NaN	NaN
Nb / Hp	P58404	P58404	-1.22777	1.22777	0.000585217	0.00139191	12	P58404	Strn4	Striatin-4	STRN4_MOUSE	2	-57.3024	0.426976	Nb	Hp	NaN	NaN	NaN
Nb / Hp	Q8BRG8	Q8BRG8	-1.15401	1.15401	0.000585728	0.00139191	12	Q8BRG8	Tmem209	Transmembrane protein 209	TM209_MOUSE	11	-55.0626	0.449374	Nb	Hp	NaN	NaN	NaN
Nb / Hp	Q3UHX2	Q3UHX2	-1.74842	1.74842	0.000586742	0.00139287	12	Q3UHX2	Pdap1	28 kDa heat- and acid-stable phosphoprotein	HAP28_MOUSE	3	-70.2372	0.297628	Nb	Hp	NaN	NaN	NaN
Nb / Hp	Q9CQW1	Q9CQW1	1.45432	1.45432	0.000587032	0.00139287	12	Q9CQW1	Ykt6	Synaptobrevin homolog YKT6	YKT6_MOUSE	11	174.028	2.74028	Nb	Hp	NaN	NaN	NaN
Nb / Hp	P00405	P00405	-0.565052	0.565052	0.000587857	0.00139302	12	P00405	Mtco2	Cytochrome c oxidase subunit 2	COX2_MOUSE	6	-32.4069	0.675931	Nb	Hp	NaN	NaN	NaN
Nb / Hp	Q99KV1	Q99KV1	-0.620224	0.620224	0.000587738	0.00139302	12	Q99KV1	Dnajb11	DnaJ homolog subfamily B member 11	DJB11_MOUSE	15	-34.943	0.65057	Nb	Hp	NaN	NaN	NaN
Nb / Hp	P97770	P97770	1.39117	1.39117	0.000589285	0.00139549	12	P97770	Thumpd3	tRNA (guanine(6)-N2)-methyltransferase THUMP3	THUM3_MOUSE	10	162.291	2.62291	Nb	Hp	NaN	NaN	NaN
Hp / Control	Q6PAC3	Q6PAC3	-1.20041	1.20041	0.000589804	0.00139582	12	Q6PAC3	Dcaf13	DDB1- and CUL4-associated factor 13	DCA13_MOUSE	12	-56.4849	0.435151	Hp	Control	NaN	NaN	NaN
Nb / Hp	P12970	P12970	0.752272	0.752272	0.00059233	0.00139817	12	P12970	Rpl7a	Large ribosomal subunit protein eL8	RL7A_MOUSE	22	68.4443	1.68444	Nb	Hp	NaN	NaN	NaN
Nb / Hp	P50431	P50431	2.43559	2.43559	0.000592029	0.00139817	12	P50431	Shmt1	Serine hydroxymethyltransferase, cytosolic	GLYC_MOUSE	13	440.986	5.40986	Nb	Hp	NaN	NaN	NaN
Nb / Hp	P63280	P63280	1.40663	1.40663	0.000591862	0.00139817	12	P63280	Ube2i	SUMO-conjugating enzyme UBC9	UBC9_MOUSE	2	165.117	2.65117	Nb	Hp	NaN	NaN	NaN
Nb / Hp	Q9JII6	Q9JII6	1.53451	1.53451	0.000592251	0.00139817	12	Q9JII6	Akr1a1	Aldo-keto reductase family 1 member A1	AK1A1_MOUSE	17	189.691	2.89691	Nb	Hp	NaN	NaN	NaN
Nb / Hp	Q2KJF1	Q2KJF1	-2.42593	2.42593	0.000593691	0.00140022	12	NaN	TREMBL:Q2KJF1	(Bos taurus) Alpha-1-B glycoprotein	NaN	12	-81.3911	0.186089	Nb	Hp	NaN	NaN	NaN
Hp / Control	Q923D2	Q923D2	-0.819626	0.819626	0.000594345	0.00140022	12	Q923D2	Blvrb	Flavin reductase (NADPH)	BLVRB_MOUSE	11	-43.3411	0.566589	Hp	Control	NaN	NaN	NaN
Nb / Hp	Q9D0I8	Q9D0I8	-1.01573	1.01573	0.000594191	0.00140022	12	Q9D0I8	Mrto4	mRNA turnover protein 4 homolog	MRT4_MOUSE	19	-50.5421	0.494579	Nb	Hp	NaN	NaN	NaN
Hp / Control	O55100	O55100	1.00155	1.00155	0.000595574	0.0014004	12	O55100	Syngr1	Synaptogyrin-1	SNG1_MOUSE	2	100.215	2.00215	Hp	Control	NaN	NaN	NaN
Nb / Hp	Q80ZS3	Q80ZS3	-0.355989	0.355989	0.000595224	0.0014004	12	Q80ZS3	Mrps26	Small ribosomal subunit protein mS26	RT26_MOUSE	8	-21.8666	0.781334	Nb	Hp	NaN	NaN	NaN
Nb / Hp	Q8R2U4	Q8R2U4	1.32635	1.32635	0.000595417	0.0014004	12	Q8R2U4	Ntmt1	N-terminal Xaa-Pro-Lys N-methyltransferase 1	NTM1A_MOUSE	4	150.768	2.50768	Nb	Hp	NaN	NaN	NaN
Hp / Control	P49452	P49452	-1.63171	1.63171	0.000598586	0.00140297	12	P49452	Cenpc	Centromere protein C	CENPC_MOUSE	2	-67.7295	0.322705	Hp	Control	NaN	NaN	NaN
Nb / Hp	Q8BU31	Q8BU31	0.219131	0.219131	0.000597682	0.00140297	12	Q8BU31	Rap2c	Ras-related protein Rap-2c	RAP2C_MOUSE	3	16.4033	1.16403	Nb	Hp	NaN	NaN	NaN
Nb / Hp	Q99MN1	Q99MN1	1.18992	1.18992	0.000598253	0.00140297	12	Q99MN1	Kars1	Lysine--tRNA ligase	SYK_MOUSE	23	128.14	2.2814	Nb	Hp	NaN	NaN	NaN
Nb / Control	Q9DCR2	Q9DCR2	1.14141	1.14141	0.00059851	0.00140297	12	Q9DCR2	Ap3s1	AP-3 complex subunit sigma-1	AP3S1_MOUSE	2	120.596	2.20596	Nb	Control	NaN	NaN	NaN
Nb / Hp	Q9Z210	Q9Z210	-1.3111	1.3111	0.000597934	0.00140297	12	Q9Z210	Pex11b	Peroxisomal membrane protein 11B	PX11B_MOUSE	13	-59.6986	0.403014	Nb	Hp	NaN	NaN	NaN
Nb / Control	O70480	O70480	-0.722827	0.722827	0.000599904	0.00140336	12	O70480	Vamp4	Vesicle-associated membrane protein 4	VAMP4_MOUSE	6	-39.4091	0.605909	Nb	Control	NaN	NaN	NaN
Hp / Control	P17225	P17225	1.10866	1.10866	0.000599293	0.00140336	12	P17225	Ptbp1	Polypyrimidine tract-binding protein 1	PTBP1_MOUSE	21	115.645	2.15645	Hp	Control	NaN	NaN	NaN
Nb / Hp	Q3U821	Q3U821	-0.783033	0.783033	0.000599618	0.00140336	12	Q3U821	Wdr75	WD repeat-containing protein 75	WDR75_MOUSE	19	-41.8856	0.581144	Nb	Hp	NaN	NaN	NaN
Nb / Hp	O08663	O08663	2.1104	2.1104	0.000600451	0.00140374	12	O08663	Metap2	Methionine aminopeptidase 2	MAP2_MOUSE	11	331.81	4.3181	Nb	Hp	NaN	NaN	NaN
Nb / Control	Q8BWG8	Q8BWG8	2.04683	2.04683	0.000602611	0.00140789	12	Q8BWG8	Arrb1	Beta-arrestin-1	ARRB1_MOUSE	6	313.198	4.13198	Nb	Control	NaN	NaN	NaN
Nb / Control	P62482	P62482	1.83348	1.83348	0.00060413	0.00141054	12	P62482	Kcnab2	Voltage-gated potassium channel subunit beta-2	KCAB2_MOUSE	11	256.397	3.56397	Nb	Control	NaN	NaN	NaN
Nb / Hp	Q80XL6	Q80XL6	-0.753539	0.753539	0.000604662	0.00141088	12	Q80XL6	Acad11	Acyl-CoA dehydrogenase family member 11	ACD11_MOUSE	10	-40.6853	0.593147	Nb	Hp	NaN	NaN	NaN
Nb / Hp	Q9JJZ6	Q9JJZ6	-1.82415	1.82415	0.000605082	0.00141096	12	Q9JJZ6	Klf13	Krueppel-like factor 13	KLF13_MOUSE	3	-71.7592	0.282408	Nb	Hp	NaN	NaN	NaN
Hp / Control	P70404	P70404	-1.06526	1.06526	0.000606673	0.00141376	12	P70404	Idh3g	Isocitrate dehydrogenase [NAD] subunit gamma 1, mitochondrial	IDHG1_MOUSE	13	-52.2114	0.477886	Hp	Control	NaN	NaN	NaN
Hp / Control	P41361	P41361	2.51235	2.51235	0.000608275	0.00141423	12	NaN	SWISS-PROT:P41361	(Bos taurus) Antithrombin-III precursor	NaN	17	470.55	5.7055	Hp	Control	NaN	NaN	NaN
Hp / Control	Q3MHN5	Q3MHN5	1.85838	1.85838	0.000608421	0.00141423	12	NaN	SWISS-PROT:Q3MHN5	(Bos taurus) Vitamin D-binding protein precursor	NaN	24	262.601	3.62601	Hp	Control	NaN	NaN	NaN
Nb / Hp	Q3V1V3	Q3V1V3	-0.872701	0.872701	0.00060815	0.00141423	12	Q3V1V3	Esf1	ESF1 homolog	ESF1_MOUSE	11	-45.3877	0.546123	Nb	Hp	NaN	NaN	NaN
Nb / Hp	Q9CQI7	Q9CQI7	-0.90877	0.90877	0.00060809	0.00141423	12	Q9CQI7	Snrpb2	U2 small nuclear ribonucleoprotein B''	RU2B_MOUSE	7	-46.7361	0.532639	Nb	Hp	NaN	NaN	NaN
Nb / Hp	P01900	P01900	-0.64402	0.64402	0.000609263	0.00141529	12	P01900	H2-D1	H-2 class I histocompatibility antigen, D-D alpha chain	HA12_MOUSE	13	-36.0073	0.639927	Nb	Hp	NaN	NaN	NaN
Nb / Hp	Q9Z0R9	Q9Z0R9	-1.60318	1.60318	0.000610177	0.00141651	12	Q9Z0R9	Fads2	Acyl-CoA 6-desaturase	FADS2_MOUSE	12	-67.085	0.32915	Nb	Hp	NaN	NaN	NaN
Nb / Hp	P62821	P62821	-0.300431	0.300431	0.000611322	0.00141827	12	P62821	Rab1a	Ras-related protein Rab-1A	RAB1A_MOUSE	20	-18.799	0.81201	Nb	Hp	NaN	NaN	NaN
Nb / Hp	A2ASZ8	A2ASZ8	-0.830594	0.830594	0.000612002	0.00141862	12	A2ASZ8	Slc25a25	Mitochondrial adenyl nucleotide antiporter SLC25A25	SCMC2_MOUSE	4	-43.7702	0.562298	Nb	Hp	NaN	NaN	NaN
Hp / Control	Q32PI4	Q32PI4	2.38134	2.38134	0.000612251	0.00141862	12	NaN	TREMBL:Q32PI4	(Bos taurus) Similar to complement factor I	NaN	6	421.02	5.2102	Hp	Control	NaN	NaN	NaN
Nb / Hp	P35601	P35601	-0.504016	0.504016	0.000615	0.00142319	12	P35601	Rfc1	Replication factor C subunit 1	RFC1_MOUSE	17	-29.4859	0.705141	Nb	Hp	NaN	NaN	NaN
Nb / Control	Q3THG9	Q3THG9	1.13595	1.13595	0.000614761	0.00142319	12	Q3THG9	Aarsd1	Alanyl-tRNA editing protein Aarsd1	AASD1_MOUSE	7	119.764	2.19764	Nb	Control	NaN	NaN	NaN
Nb / Hp	Q8R0Z5	Q8R0Z5	-0.288185	0.288185	0.000616146	0.00142493	12	Q8R0Z5	Slc25a28	Mitoferrin-2	MFRN2_MOUSE	2	-18.1068	0.818932	Nb	Hp	NaN	NaN	NaN
Nb / Control	P28352	P28352	1.47665	1.47665	0.000619602	0.00143202	12	P28352	Apex1	DNA repair nuclease/redox regulator APEX1	APEX1_MOUSE	17	178.302	2.78302	Nb	Control	NaN	NaN	NaN
Nb / Hp	Q80ZK0	Q80ZK0	-0.313212	0.313212	0.000624329	0.00144119	12	Q80ZK0	Mrps10	Small ribosomal subunit protein uS10m	RT10_MOUSE	5	-19.5152	0.804848	Nb	Hp	NaN	NaN	NaN
Nb / Hp	Q9QXV1	Q9QXV1	-2.275	2.275	0.000624358	0.00144119	12	Q9QXV1	Cbx8	Chromobox protein homolog 8	CBX8_MOUSE	4	-79.3388	0.206612	Nb	Hp	NaN	NaN	NaN
Nb / Hp	Q78PY7	Q78PY7	1.54016	1.54016	0.000625883	0.00144362	12	Q78PY7	Snd1	Staphylococcal nuclease domain-containing protein 1	SND1_MOUSE	48	190.827	2.90827	Nb	Hp	NaN	NaN	NaN
Nb / Control	Q9CYN2	Q9CYN2	-0.61168	0.61168	0.000626199	0.00144362	12	Q9CYN2	Spcs2	Signal peptidase complex subunit 2	SPCS2_MOUSE	20	-34.5566	0.654434	Nb	Control	NaN	NaN	NaN
Nb / Hp	Q8BJW6	Q8BJW6	1.61097	1.61097	0.000627188	0.00144498	12	Q8BJW6	Eif2a	Eukaryotic translation initiation factor 2A	EIF2A_MOUSE	16	205.457	3.05457	Nb	Hp	NaN	NaN	NaN
Nb / Hp	O09043	O09043	-0.801206	0.801206	0.000629179	0.00144866	12	O09043	Napsa	Napsin-A	NAPSA_MOUSE	2	-42.6131	0.573869	Nb	Hp	NaN	NaN	NaN
Nb / Hp	P32020	P32020	-1.2742	1.2742	0.000630514	0.00145003	12	P32020	Scp2	Sterol carrier protein 2	SCP2_MOUSE	16	-58.6546	0.413454	Nb	Hp	NaN	NaN	NaN
Nb / Control	P50431	P50431	1.79926	1.79926	0.000630568	0.00145003	12	P50431	Shmt1	Serine hydroxymethyltransferase, cytosolic	GLYC_MOUSE	13	248.041	3.48041	Nb	Control	NaN	NaN	NaN
Nb / Control	P62196	P62196	1.41032	1.41032	0.000633224	0.00145522	12	P62196	Psmc5	26S proteasome regulatory subunit 8	PRS8_MOUSE	24	165.797	2.65797	Nb	Control	NaN	NaN	NaN
Nb / Hp	O88856	O88856	-1.53719	1.53719	0.000634427	0.00145524	12	O88856	Tpst2	Protein-tyrosine sulfotransferase 2	TPST2_MOUSE	5	-65.5443	0.344557	Nb	Hp	NaN	NaN	NaN
Nb / Hp	Q8BRK9	Q8BRK9	-1.34293	1.34293	0.000634293	0.00145524	12	Q8BRK9	Man2a2	Alpha-mannosidase 2x	MA2A2_MOUSE	9	-60.578	0.39422	Nb	Hp	NaN	NaN	NaN
Nb / Hp	Q8CCM6	Q8CCM6	-0.936815	0.936815	0.000633945	0.00145524	12	Q8CCM6	Timm21	Mitochondrial import inner membrane translocase subunit Tim21	TIM21_MOUSE	5	-47.7615	0.522385	Nb	Hp	NaN	NaN	NaN
Nb / Hp	Q9QXB9	Q9QXB9	2.07391	2.07391	0.000639371	0.00146566	12	Q9QXB9	Drg2	Developmentally-regulated GTP-binding protein 2	DRG2_MOUSE	14	321.025	4.21025	Nb	Hp	NaN	NaN	NaN
Nb / Hp	Q8K0C9	Q8K0C9	2.59457	2.59457	0.000641273	0.00146726	12	Q8K0C9	Gmds	GDP-mannose 4,6 dehydratase	GMDS_MOUSE	7	504.01	6.0401	Nb	Hp	NaN	NaN	NaN
Hp / Control	Q91YS8	Q91YS8	0.968337	0.968337	0.00064107	0.00146726	12	Q91YS8	Camk1	Calcium/calmodulin-dependent protein kinase type 1	KCC1A_MOUSE	7	95.6584	1.95658	Hp	Control	NaN	NaN	NaN
Nb / Hp	Q9CQ85	Q9CQ85	-1.19046	1.19046	0.000640489	0.00146726	12	Q9CQ85	Timm22	Mitochondrial import inner membrane translocase subunit Tim22	TIM22_MOUSE	4	-56.1838	0.438162	Nb	Hp	NaN	NaN	NaN
Nb / Hp	Q8BHC4	Q8BHC4	-1.04388	1.04388	0.000642247	0.00146765	12	Q8BHC4	Dcakd	Dephospho-CoA kinase domain-containing protein	DCAKD_MOUSE	12	-51.498	0.48502	Nb	Hp	NaN	NaN	NaN
Nb / Hp	Q9JHI7	Q9JHI7	-0.540752	0.540752	0.000641944	0.00146765	12	Q9JHI7	Exosc9	Exosome complex component RRP45	EXOS9_MOUSE	6	-31.2588	0.687412	Nb	Hp	NaN	NaN	NaN
Nb / Hp	Q9CYK1	Q9CYK1	-0.524193	0.524193	0.000643338	0.0014683	12	Q9CYK1	Wars2	Tryptophan--tRNA ligase, mitochondrial	SYWM_MOUSE	7	-30.4652	0.695348	Nb	Hp	NaN	NaN	NaN
Nb / Hp	Q9D0T1	Q9D0T1	0.0321855	0.0321855	0.000643135	0.0014683	12	Q9D0T1	Snu13	NHP2-like protein 1	NH2L1_MOUSE	9	2.256	1.02256	Nb	Hp	NaN	NaN	NaN
Nb / Hp	Q0V8M9	Q0V8M9	-2.54464	2.54464	0.000647199	0.0014762	12	NaN	TREMBL:Q0V8M9;Q9TRI0	(Bos taurus) similar to inter-alpha (globulin) inhibitor H3 isoform 2	NaN	16	-82.8609	0.171391	Nb	Hp	NaN	NaN	NaN
Nb / Control	P26516	P26516	1.54688	1.54688	0.000647796	0.00147663	12	P26516	Psmd7	26S proteasome non-ATPase regulatory subunit 7	PSMD7_MOUSE	15	192.185	2.92185	Nb	Control	NaN	NaN	NaN
Nb / Hp	O88545	O88545	1.49204	1.49204	0.000648917	0.00147827	12	O88545	Cops6	COP9 signalosome complex subunit 6	CSN6_MOUSE	10	181.287	2.81287	Nb	Hp	NaN	NaN	NaN
Nb / Control	P59110	P59110	-1.77833	1.77833	0.000650797	0.00148003	12	P59110	Senp1	Sentrin-specific protease 1	SENP1_MOUSE	4	-70.8479	0.291521	Nb	Control	NaN	NaN	NaN
Nb / Hp	Q3TL44	Q3TL44	-1.08895	1.08895	0.000650906	0.00148003	12	Q3TL44	Nlrx1	NLR family member X1	NLRX1_MOUSE	12	-52.9896	0.470104	Nb	Hp	NaN	NaN	NaN
Nb / Hp	Q80UG5	Q80UG5	0.869861	0.869861	0.000650182	0.00148003	12	Q80UG5	Septin9	Septin-9	SEPT9_MOUSE	10	82.7487	1.82749	Nb	Hp	NaN	NaN	NaN
Nb / Control	P23475	P23475	1.69394	1.69394	0.000652072	0.00148176	12	P23475	Xrcc6	X-ray repair cross-complementing protein 6	XRCC6_MOUSE	10	223.539	3.23539	Nb	Control	NaN	NaN	NaN
Nb / Hp	O08919	O08919	1.40823	1.40823	0.000655846	0.00148839	12	O08919	Numbl	Numb-like protein	NUMBL_MOUSE	2	165.412	2.65412	Nb	Hp	NaN	NaN	NaN
Nb / Hp	Q921M3	Q921M3	-0.247071	0.247071	0.000656212	0.00148839	12	Q921M3	Sf3b3	Splicing factor 3B subunit 3	SF3B3_MOUSE	49	-15.7394	0.842606	Nb	Hp	NaN	NaN	NaN
Nb / Control	Q9CY50	Q9CY50	-1.48349	1.48349	0.000655919	0.00148839	12	Q9CY50	Ssr1	Translocon-associated protein subunit alpha	SSRA_MOUSE	3	-64.2379	0.357621	Nb	Control	NaN	NaN	NaN
Nb / Control	Q91YS8	Q91YS8	1.72767	1.72767	0.000658522	0.0014927	12	Q91YS8	Camk1	Calcium/calmodulin-dependent protein kinase type 1	KCC1A_MOUSE	7	231.192	3.31192	Nb	Control	NaN	NaN	NaN
Nb / Hp	P70280	P70280	-0.861739	0.861739	0.000659446	0.00149387	12	P70280	Vamp7	Vesicle-associated membrane protein 7	VAMP7_MOUSE	8	-44.9711	0.550289	Nb	Hp	NaN	NaN	NaN
Hp / Control	P11031	P11031	1.59089	1.59089	0.000660717	0.00149582	12	P11031	Sub1	Activated RNA polymerase II transcriptional coactivator p15	TCP4_MOUSE	7	201.236	3.01236	Hp	Control	NaN	NaN	NaN
Nb / Hp	O35737	O35737	-0.934263	0.934263	0.000662167	0.00149725	12	O35737	Hnrnph1	Heterogeneous nuclear ribonucleoprotein H	HNRH1_MOUSE	17	-47.669	0.52331	Nb	Hp	NaN	NaN	NaN
Nb / Hp	Q9EST5	Q9EST5	1.34919	1.34919	0.000661995	0.00149725	12	Q9EST5	Anp32b	Acidic leucine-rich nuclear phosphoprotein 32 family member B	AN32B_MOUSE	8	154.77	2.5477	Nb	Hp	NaN	NaN	NaN
Nb / Control	Q61081	Q61081	1.43916	1.43916	0.000666143	0.00150531	12	Q61081	Cdc37	Hsp90 co-chaperone Cdc37	CDC37_MOUSE	18	171.164	2.71164	Nb	Control	NaN	NaN	NaN
Nb / Hp	Q921N7	Q921N7	-0.663028	0.663028	0.000666587	0.00150538	12	Q921N7	Tmem70	Transmembrane protein 70, mitochondrial	TMM70_MOUSE	2	-36.8449	0.631551	Nb	Hp	NaN	NaN	NaN
Nb / Hp	Q64310	Q64310	-1.20582	1.20582	0.000667085	0.00150558	12	Q64310	Surf4	Surfeit locus protein 4	SURF4_MOUSE	7	-56.6476	0.433524	Nb	Hp	NaN	NaN	NaN
Nb / Hp	P58064	P58064	-0.969667	0.969667	0.000671617	0.00151393	12	P58064	Mrps6	Small ribosomal subunit protein bS6m	RT06_MOUSE	6	-48.9376	0.510624	Nb	Hp	NaN	NaN	NaN
Nb / Control	Q9D2V8	Q9D2V8	-0.395614	0.395614	0.000671488	0.00151393	12	Q9D2V8	Mfsd10	Major facilitator superfamily domain-containing protein 10	MFS10_MOUSE	9	-23.9834	0.760166	Nb	Control	NaN	NaN	NaN
Nb / Control	P10922	P10922	-0.986087	0.986087	0.000672381	0.00151472	12	P10922	H1-0	Histone H1.0	H10_MOUSE	9	-49.5155	0.504845	Nb	Control	NaN	NaN	NaN
Nb / Hp	Q8BKZ9	Q8BKZ9	-0.968279	0.968279	0.000673381	0.00151604	12	Q8BKZ9	Pdhx	Pyruvate dehydrogenase protein X component, mitochondrial	ODPX_MOUSE	12	-48.8885	0.511115	Nb	Hp	NaN	NaN	NaN
Nb / Hp	Q8BP47	Q8BP47	2.09011	2.09011	0.000675656	0.00152023	12	Q8BP47	Nars1	Asparagine--tRNA ligase, cytoplasmic	SYNC_MOUSE	18	325.779	4.25779	Nb	Hp	NaN	NaN	NaN
Nb / Control	Q8R0S1	Q8R0S1	0.818741	0.818741	0.000678629	0.00152598	12	Q8R0S1	Atf7	Cyclic AMP-dependent transcription factor ATF-7	ATF7_MOUSE	2	76.3866	1.76387	Nb	Control	NaN	NaN	NaN
Hp / Control	Q9DCC8	Q9DCC8	1.14398	1.14398	0.000680857	0.00153004	12	Q9DCC8	Tomm20	Mitochondrial import receptor subunit TOM20 homolog	TOM20_MOUSE	4	120.99	2.2099	Hp	Control	NaN	NaN	NaN
Nb / Control	Q9CYH6	Q9CYH6	-1.02238	1.02238	0.000681561	0.00153068	12	Q9CYH6	Rrs1	Ribosome biogenesis regulatory protein homolog	RRS1_MOUSE	25	-50.7696	0.492304	Nb	Control	NaN	NaN	NaN
Nb / Hp	Q8VDQ9	Q8VDQ9	-1.59417	1.59417	0.000681991	0.00153071	12	Q8VDQ9	Kri1	Protein KRI1 homolog	KRI1_MOUSE	7	-66.8787	0.331213	Nb	Hp	NaN	NaN	NaN
Nb / Control	Q9CZ30	Q9CZ30	1.74557	1.74557	0.000682648	0.00153124	12	Q9CZ30	Ola1	Obg-like ATPase 1	OLA1_MOUSE	16	235.328	3.35328	Nb	Control	NaN	NaN	NaN
Nb / Hp	Q99KI3	Q99KI3	-1.15124	1.15124	0.000685053	0.0015357	12	Q99KI3	Emc3	ER membrane protein complex subunit 3	EMC3_MOUSE	14	-54.9762	0.450238	Nb	Hp	NaN	NaN	NaN
Hp / Control	Q61458	Q61458	-0.827244	0.827244	0.000685567	0.00153591	12	Q61458	Ccnh	Cyclin-H	CCNH_MOUSE	4	-43.6395	0.563605	Hp	Control	NaN	NaN	NaN
Nb / Hp	Q9ERD7	Q9ERD7	1.27991	1.27991	0.000687741	0.00153983	12	Q9ERD7	Tubb3	Tubulin beta-3 chain	TBB3_MOUSE	7	142.824	2.42824	Nb	Hp	NaN	NaN	NaN
Nb / Hp	A2AGT5	A2AGT5	1.0707	1.0707	0.000690565	0.00154521	12	A2AGT5	Ckap5	Cytoskeleton-associated protein 5	CKAP5_MOUSE	36	110.045	2.10045	Nb	Hp	NaN	NaN	NaN
Nb / Hp	P08779	P08779	-1.79162	1.79162	0.000697714	0.00155906	12	NaN	SWISS-PROT:P08779	Tax_Id=9606 Gene_Symbol=KRT16 Keratin, type I cytoskeletal 16	NaN	21	-71.1152	0.288848	Nb	Hp	NaN	NaN	NaN
Nb / Control	P70460	P70460	1.41465	1.41465	0.000699676	0.00155906	12	P70460	Vasp	Vasodilator-stimulated phosphoprotein	VASP_MOUSE	8	166.595	2.66595	Nb	Control	NaN	NaN	NaN
Nb / Hp	P80316	P80316	1.66184	1.66184	0.000698115	0.00155906	12	P80316	Cct5	T-complex protein 1 subunit epsilon	TCPE_MOUSE	36	216.421	3.16421	Nb	Hp	NaN	NaN	NaN
Nb / Hp	Q09200	Q09200	-1.06965	1.06965	0.000699487	0.00155906	12	Q09200	B4galnt1	Beta-1,4 N-acetylgalactosaminyltransferase 1	B4GN1_MOUSE	24	-52.3566	0.476434	Nb	Hp	NaN	NaN	NaN
Nb / Hp	Q8R0F8	Q8R0F8	0.773394	0.773394	0.000699164	0.00155906	12	Q8R0F8	Fahd1	Oxaloacetate tautomerase FAHD1, mitochondrial	FAHD1_MOUSE	3	70.9286	1.70929	Nb	Hp	NaN	NaN	NaN
Nb / Hp	Q8VCT3	Q8VCT3	1.86728	1.86728	0.000699108	0.00155906	12	Q8VCT3	Rnpep	Aminopeptidase B	AMPB_MOUSE	24	264.845	3.64845	Nb	Hp	NaN	NaN	NaN
Nb / Control	Q921T2	Q921T2	-1.27405	1.27405	0.00069974	0.00155906	12	Q921T2	Tor1aip1	Torsin-1A-interacting protein 1	TOIP1_MOUSE	19	-58.6503	0.413497	Nb	Control	NaN	NaN	NaN
Hp / Control	P04441	P04441	1.0552	1.0552	0.000702302	0.00156381	12	P04441	Cd74	H-2 class II histocompatibility antigen gamma chain	HG2A_MOUSE	4	107.801	2.07801	Hp	Control	NaN	NaN	NaN
Nb / Hp	O55101	O55101	-1.34713	1.34713	0.000703711	0.00156504	12	O55101	Syngr2	Synaptogyrin-2	SNG2_MOUSE	2	-60.6927	0.393073	Nb	Hp	NaN	NaN	NaN
Nb / Control	Q64442	Q64442	1.87136	1.87136	0.000703656	0.00156504	12	Q64442	Sord	Sorbitol dehydrogenase	DHSO_MOUSE	9	265.878	3.65878	Nb	Control	NaN	NaN	NaN
Nb / Hp	Q9ER72	Q9ER72	1.88368	1.88368	0.000704467	0.00156577	12	Q9ER72	Cars1	Cysteine--tRNA ligase, cytoplasmic	SYCC_MOUSE	22	269.014	3.69014	Nb	Hp	NaN	NaN	NaN
Nb / Hp	Q8BJ05	Q8BJ05	-1.88608	1.88608	0.000706051	0.00156712	12	Q8BJ05	Zc3h14	Zinc finger CCCH domain-containing protein 14	ZC3HE_MOUSE	9	-72.946	0.27054	Nb	Hp	NaN	NaN	NaN
Nb / Hp	Q99MR3	Q99MR3	-1.07207	1.07207	0.000706612	0.00156712	12	Q99MR3	Slc12a9	Solute carrier family 12 member 9	S12A9_MOUSE	11	-52.4363	0.475637	Nb	Hp	NaN	NaN	NaN
Hp / Control	Q9CY21	Q9CY21	-1.19644	1.19644	0.000706792	0.00156712	12	Q9CY21	Bud23	18S rRNA (guanine-N(7))-methyltransferase	BUD23_MOUSE	4	-56.3649	0.436351	Hp	Control	NaN	NaN	NaN
Nb / Control	Q9D024	Q9D024	-0.862067	0.862067	0.000705525	0.00156712	12	Q9D024	Ccdc47	PAT complex subunit CCDC47	CCD47_MOUSE	18	-44.9836	0.550164	Nb	Control	NaN	NaN	NaN
Nb / Control	Q04646	Q04646	0.319149	0.319149	0.000709612	0.00157114	12	Q04646	Fxyd2	Sodium/potassium-transporting ATPase subunit gamma	ATNG_MOUSE	2	24.7594	1.24759	Nb	Control	NaN	NaN	NaN
Nb / Hp	Q8BHZ4	Q8BHZ4	-0.763466	0.763466	0.000709896	0.00157114	12	Q8BHZ4	Znf592	Zinc finger protein 592	ZN592_MOUSE	4	-41.092	0.58908	Nb	Hp	NaN	NaN	NaN
Nb / Hp	Q9CZJ1	Q9CZJ1	-1.12666	1.12666	0.000709074	0.00157114	12	Q9CZJ1	Utp11	Probable U3 small nucleolar RNA-associated protein 11	UTP11_MOUSE	8	-54.2027	0.457973	Nb	Hp	NaN	NaN	NaN
Nb / Hp	P27790	P27790	-0.82574	0.82574	0.000710996	0.00157263	12	P27790	Cenpb	Major centromere autoantigen B	CENPB_MOUSE	3	-43.5807	0.564193	Nb	Hp	NaN	NaN	NaN
Nb / Control	Q8R4D1	Q8R4D1	-1.49929	1.49929	0.000711619	0.00157305	12	Q8R4D1	Slc9a8	Sodium/hydrogen exchanger 8	SL9A8_MOUSE	2	-64.6273	0.353727	Nb	Control	NaN	NaN	NaN
Nb / Hp	Q8BG67	Q8BG67	-0.786624	0.786624	0.000712135	0.00157324	12	Q8BG67	Efr3a	Protein EFR3 homolog A	EFR3A_MOUSE	5	-42.0301	0.579699	Nb	Hp	NaN	NaN	NaN
Nb / Hp	Q9R1Q9	Q9R1Q9	-1.64698	1.64698	0.000712668	0.00157347	12	Q9R1Q9	Atp6ap1	V-type proton ATPase subunit S1	VAS1_MOUSE	11	-68.0691	0.319309	Nb	Hp	NaN	NaN	NaN
Nb / Control	Q8C0C7	Q8C0C7	1.23464	1.23464	0.000713854	0.00157513	12	Q8C0C7	Farsa	Phenylalanine--tRNA ligase alpha subunit	SYFA_MOUSE	14	135.322	2.35322	Nb	Control	NaN	NaN	NaN
Nb / Hp	Q61103	Q61103	-0.562315	0.562315	0.000716386	0.00157541	12	Q61103	Dpf2	Zinc finger protein ubi-d4	REQU_MOUSE	5	-32.2785	0.677215	Nb	Hp	NaN	NaN	NaN
Nb / Control	Q811S7	Q811S7	1.61378	1.61378	0.000717261	0.00157541	12	Q811S7	Ubp1	Upstream-binding protein 1	UBIP1_MOUSE	3	206.052	3.06052	Nb	Control	NaN	NaN	NaN
Nb / Control	Q8C2K1	Q8C2K1	2.73461	2.73461	0.000715868	0.00157541	12	Q8C2K1	Def6	Differentially expressed in FDCP 6	DEFI6_MOUSE	2	565.578	6.65578	Nb	Control	NaN	NaN	NaN
Nb / Hp	Q8CIV8	Q8CIV8	2.35876	2.35876	0.000717181	0.00157541	12	Q8CIV8	Tbce	Tubulin-specific chaperone E	TBCE_MOUSE	2	412.928	5.12928	Nb	Hp	NaN	NaN	NaN
Nb / Control	Q8K2C7	Q8K2C7	-1.01122	1.01122	0.00071743	0.00157541	12	Q8K2C7	Os9	Protein OS-9	OS9_MOUSE	17	-50.3872	0.496128	Nb	Control	NaN	NaN	NaN
Nb / Hp	Q9D172	Q9D172	-0.972149	0.972149	0.000716564	0.00157541	12	Q9D172	Gatd3	Glutamine amidotransferase-like class 1 domain-containing protein 3, mitochondrial	GAL3A_MOUSE	5	-49.0254	0.509746	Nb	Hp	NaN	NaN	NaN
Nb / Hp	Q9DCU6	Q9DCU6	-0.554684	0.554684	0.00071516	0.00157541	12	Q9DCU6	Mrpl4	Large ribosomal subunit protein uL4m	RM04_MOUSE	9	-31.9194	0.680806	Nb	Hp	NaN	NaN	NaN
Nb / Hp	Q9JM62	Q9JM62	-1.87448	1.87448	0.000716995	0.00157541	12	Q9JM62	Reep6	Receptor expression-enhancing protein 6	REEP6_MOUSE	2	-72.7275	0.272725	Nb	Hp	NaN	NaN	NaN
Nb / Hp	Q99MJ9	Q99MJ9	-0.318394	0.318394	0.000718033	0.00157579	12	Q99MJ9	Ddx50	ATP-dependent RNA helicase DDX50	DDX50_MOUSE	16	-19.8038	0.801962	Nb	Hp	NaN	NaN	NaN
Nb / Control	P24547	P24547	1.23641	1.23641	0.000719126	0.0015763	12	P24547	Impdh2	Inosine-5'-monophosphate dehydrogenase 2	IMDH2_MOUSE	26	135.612	2.35612	Nb	Control	NaN	NaN	NaN
Nb / Control	Q8R5J9	Q8R5J9	-0.530259	0.530259	0.000718703	0.0015763	12	Q8R5J9	Arl6ip5	PRA1 family protein 3	PRAF3_MOUSE	10	-30.757	0.69243	Nb	Control	NaN	NaN	NaN
Nb / Control	Q3UMC0	Q3UMC0	1.02241	1.02241	0.000720012	0.00157729	12	Q3UMC0	Afg2a	ATPase family gene 2 protein homolog A	AFG2A_MOUSE	9	103.131	2.03131	Nb	Control	NaN	NaN	NaN
Nb / Hp	Q497V5	Q497V5	-0.39628	0.39628	0.000722264	0.00158128	12	Q497V5	Srbd1	S1 RNA-binding domain-containing protein 1	SRBD1_MOUSE	13	-24.0185	0.759815	Nb	Hp	NaN	NaN	NaN
Nb / Hp	Q812F8	Q812F8	-1.20965	1.20965	0.000723202	0.00158238	12	Q812F8	Mgat4b	Alpha-1,3-mannosyl-glycoprotein 4-beta-N-acetylglucosaminyltransferase B	MGT4B_MOUSE	6	-56.7626	0.432374	Nb	Hp	NaN	NaN	NaN
Nb / Hp	Q6P8I4	Q6P8I4	-1.55411	1.55411	0.000724349	0.001583	12	Q6P8I4	Pcnp	PEST proteolytic signal-containing nuclear protein	PCNP_MOUSE	4	-65.9461	0.340539	Nb	Hp	NaN	NaN	NaN
Nb / Control	Q9D0M2	Q9D0M2	-0.907122	0.907122	0.000723945	0.001583	12	Q9D0M2	Cdca7	Cell division cycle-associated protein 7	CDCA7_MOUSE	2	-46.6752	0.533248	Nb	Control	NaN	NaN	NaN
Nb / Hp	P17182	P17182	2.02313	2.02313	0.000727015	0.00158787	12	P17182	Eno1	Alpha-enolase	ENOA_MOUSE	39	306.465	4.06465	Nb	Hp	NaN	NaN	NaN
Nb / Hp	Q6PIC6	Q6PIC6	-0.47146	0.47146	0.000728763	0.00159074	12	Q6PIC6	Atp1a3	Sodium/potassium-transporting ATPase subunit alpha-3	AT1A3_MOUSE	35	-27.8766	0.721234	Nb	Hp	NaN	NaN	NaN
Nb / Hp	P25444	P25444	1.09898	1.09898	0.000730235	0.001593	12	P25444	Rps2	Small ribosomal subunit protein uS5	RS2_MOUSE	18	114.203	2.14203	Nb	Hp	NaN	NaN	NaN
Nb / Hp	Q9Z315	Q9Z315	-1.5711	1.5711	0.000730693	0.00159305	12	Q9Z315	Sart1	U4/U6.U5 tri-snRNP-associated protein 1	SNUT1_MOUSE	22	-66.3448	0.336552	Nb	Hp	NaN	NaN	NaN
Nb / Hp	Q9R233	Q9R233	-1.26277	1.26277	0.000740619	0.00161373	12	Q9R233	Tapbp	Tapasin	TPSN_MOUSE	13	-58.3256	0.416744	Nb	Hp	NaN	NaN	NaN
Nb / Hp	Q8CCS6	Q8CCS6	-1.46573	1.46573	0.000742753	0.00161741	12	Q8CCS6	Pabpn1	Polyadenylate-binding protein 2	PABP2_MOUSE	4	-63.7947	0.362053	Nb	Hp	NaN	NaN	NaN
Nb / Hp	Q9CQE7	Q9CQE7	-0.904091	0.904091	0.000747417	0.0016266	12	Q9CQE7	Ergic3	Endoplasmic reticulum-Golgi intermediate compartment protein 3	ERGI3_MOUSE	5	-46.5631	0.534369	Nb	Hp	NaN	NaN	NaN
Nb / Hp	Q9CWG8	Q9CWG8	2.30096	2.30096	0.000748767	0.00162799	12	Q9CWG8	Ndufaf7	Protein arginine methyltransferase NDUFAF7, mitochondrial	NDUF7_MOUSE	4	392.786	4.92786	Nb	Hp	NaN	NaN	NaN
Nb / Hp	Q9CZP5	Q9CZP5	-0.897967	0.897967	0.000748948	0.00162799	12	Q9CZP5	Bcs1l	Mitochondrial chaperone BCS1	BCS1_MOUSE	14	-46.3358	0.536642	Nb	Hp	NaN	NaN	NaN
Nb / Hp	P61967	P61967	0.642814	0.642814	0.000750352	0.00162911	12	P61967	Ap1s1	AP-1 complex subunit sigma-1A	AP1S1_MOUSE	4	56.1371	1.56137	Nb	Hp	NaN	NaN	NaN
Nb / Hp	Q99J77	Q99J77	1.061	1.061	0.00075017	0.00162911	12	Q99J77	Nans	Sialic acid synthase	SIAS_MOUSE	10	108.637	2.08637	Nb	Hp	NaN	NaN	NaN
Nb / Control	P62301	P62301	1.03397	1.03397	0.000751699	0.00163106	12	P62301	Rps13	Small ribosomal subunit protein uS15	RS13_MOUSE	14	104.764	2.04764	Nb	Control	NaN	NaN	NaN
Nb / Hp	Q922J9	Q922J9	-0.741107	0.741107	0.000753701	0.00163444	12	Q922J9	Far1	Fatty acyl-CoA reductase 1	FACR1_MOUSE	24	-40.172	0.59828	Nb	Hp	NaN	NaN	NaN
Nb / Hp	ENSEMBL:ENSBTAP00000032840	ENSEMBL:ENSBTAP00000032840	-0.609343	0.609343	0.000754432	0.00163505	12	NaN	(Bos	taurus) similar to apolipoprotein B, partial	NaN	16	-34.4505	0.655495	Nb	Hp	NaN	NaN	NaN
Nb / Hp	Q8CIB6	Q8CIB6	-1.28771	1.28771	0.000757347	0.00164039	12	Q8CIB6	Tmem230	Transmembrane protein 230	TM230_MOUSE	5	-59.04	0.4096	Nb	Hp	NaN	NaN	NaN
Nb / Hp	Q62426	Q62426	2.49023	2.49023	0.000759136	0.00164329	12	Q62426	Cstb	Cystatin-B	CYTB_MOUSE	3	461.869	5.61869	Nb	Hp	NaN	NaN	NaN
Nb / Hp	Q8K4L0	Q8K4L0	-0.423139	0.423139	0.000761527	0.00164652	12	Q8K4L0	Ddx54	ATP-dependent RNA helicase DDX54	DDX54_MOUSE	22	-25.42	0.7458	Nb	Hp	NaN	NaN	NaN
Nb / Hp	Q9CXY9	Q9CXY9	-1.22885	1.22885	0.000761096	0.00164652	12	Q9CXY9	Pigk	GPI-anchor transamidase	GPI8_MOUSE	11	-57.3343	0.426657	Nb	Hp	NaN	NaN	NaN
Nb / Hp	Q9CRC8	Q9CRC8	1.3312	1.3312	0.000765082	0.00165323	12	Q9CRC8	Lrrc40	Leucine-rich repeat-containing protein 40	LRC40_MOUSE	18	151.612	2.51612	Nb	Hp	NaN	NaN	NaN
Nb / Hp	P35980	P35980	1.20317	1.20317	0.000766627	0.00165559	12	P35980	Rpl18	Large ribosomal subunit protein eL18	RL18_MOUSE	11	130.244	2.30244	Nb	Hp	NaN	NaN	NaN
Nb / Control	Q91XA2	Q91XA2	-0.627188	0.627188	0.000767719	0.00165697	12	Q91XA2	Golm1	Golgi membrane protein 1	GOLM1_MOUSE	7	-35.2563	0.647437	Nb	Control	NaN	NaN	NaN
Nb / Hp	O88455	O88455	-1.36881	1.36881	0.000768429	0.00165752	12	O88455	Dhcr7	7-dehydrocholesterol reductase	DHCR7_MOUSE	4	-61.279	0.38721	Nb	Hp	NaN	NaN	NaN
Nb / Control	Q9CY27	Q9CY27	-0.539704	0.539704	0.000771121	0.00166235	12	Q9CY27	Tecr	Very-long-chain enoyl-CoA reductase	TECR_MOUSE	15	-31.2088	0.687912	Nb	Control	NaN	NaN	NaN
Nb / Control	Q640M1	Q640M1	-1.24704	1.24704	0.000772172	0.00166363	12	Q640M1	Utp14a	U3 small nucleolar RNA-associated protein 14 homolog A	UT14A_MOUSE	26	-57.8689	0.421311	Nb	Control	NaN	NaN	NaN
Nb / Hp	Q8CI11	Q8CI11	-0.635194	0.635194	0.000774341	0.00166663	12	Q8CI11	Gnl3	Guanine nucleotide-binding protein-like 3	GNL3_MOUSE	29	-35.6146	0.643854	Nb	Hp	NaN	NaN	NaN
Nb / Control	Q8K2Q7	Q8K2Q7	1.6899	1.6899	0.000774478	0.00166663	12	Q8K2Q7	Brox	BRO1 domain-containing protein BROX	BROX_MOUSE	5	222.635	3.22635	Nb	Control	NaN	NaN	NaN
Nb / Hp	Q8BMQ8	Q8BMQ8	-0.443162	0.443162	0.000774993	0.00166676	12	Q8BMQ8	Mon1b	Vacuolar fusion protein MON1 homolog B	MON1B_MOUSE	2	-26.4479	0.735521	Nb	Hp	NaN	NaN	NaN
Nb / Hp	Q8CFQ3	Q8CFQ3	-0.681713	0.681713	0.000775533	0.00166694	12	Q8CFQ3	Aqr	RNA helicase aquarius	AQR_MOUSE	34	-37.6575	0.623425	Nb	Hp	NaN	NaN	NaN
Nb / Control	Q99P72	Q99P72	-0.839568	0.839568	0.000776945	0.00166899	12	Q99P72	Rtn4	Reticulon-4	RTN4_MOUSE	21	-44.1189	0.558811	Nb	Control	NaN	NaN	NaN
Nb / Control	Q9CQV8	Q9CQV8	1.34715	1.34715	0.000778134	0.00167057	12	Q9CQV8	Ywhab	14-3-3 protein beta/alpha	1433B_MOUSE	19	154.409	2.54409	Nb	Control	NaN	NaN	NaN
Hp / Control	Q9WVF7	Q9WVF7	-0.946233	0.946233	0.000781189	0.00167614	12	Q9WVF7	Pole	DNA polymerase epsilon catalytic subunit A	DPOE1_MOUSE	17	-48.1014	0.518986	Hp	Control	NaN	NaN	NaN
Nb / Hp	Q99N87	Q99N87	-0.809398	0.809398	0.00078202	0.00167694	12	Q99N87	Mrps5	Small ribosomal subunit protein uS5m	RT05_MOUSE	10	-42.938	0.57062	Nb	Hp	NaN	NaN	NaN
Hp / Control	P21981	P21981	-2.6412	2.6412	0.000784237	0.00167988	12	P21981	Tgm2	Protein-glutamine gamma-glutamyltransferase 2	TGM2_MOUSE	11	-83.9705	0.160295	Hp	Control	NaN	NaN	NaN
Nb / Hp	P39054	P39054	0.817147	0.817147	0.000784311	0.00167988	12	P39054	Dnm2	Dynamin-2	DYN2_MOUSE	23	76.1919	1.76192	Nb	Hp	NaN	NaN	NaN
Nb / Hp	Q6A0D4	Q6A0D4	-1.40548	1.40548	0.000786338	0.00168225	12	Q6A0D4	Rftn1	Raftlin	RFTN1_MOUSE	5	-62.2506	0.377494	Nb	Hp	NaN	NaN	NaN
Nb / Hp	Q9DBG1	Q9DBG1	-0.975519	0.975519	0.000786262	0.00168225	12	Q9DBG1	Cyp27a1	Sterol 26-hydroxylase, mitochondrial	CP27A_MOUSE	10	-49.1443	0.508557	Nb	Hp	NaN	NaN	NaN
Nb / Control	Q8CCB4	Q8CCB4	1.29551	1.29551	0.000787487	0.00168372	12	Q8CCB4	Vps53	Vacuolar protein sorting-associated protein 53 homolog	VPS53_MOUSE	10	145.463	2.45463	Nb	Control	NaN	NaN	NaN
Nb / Hp	P35908v2	P35908v2	-1.89452	1.89452	0.00078923	0.00168646	12	NaN	SWISS-PROT:P35908	Tax_Id=9606 Gene_Symbol=KRT2 Keratin, type II cytoskeletal 2 epidermal	NaN	46	-73.1036	0.268964	Nb	Hp	NaN	NaN	NaN
Nb / Control	Q8BV13	Q8BV13	2.12977	2.12977	0.000794719	0.0016972	12	Q8BV13	Cops7b	COP9 signalosome complex subunit 7b	CSN7B_MOUSE	4	337.649	4.37649	Nb	Control	NaN	NaN	NaN
Nb / Hp	Q8R332	Q8R332	-1.31111	1.31111	0.000795669	0.00169823	12	Q8R332	Nup58	Nucleoporin p58/p45	NUP58_MOUSE	5	-59.6988	0.403012	Nb	Hp	NaN	NaN	NaN
Hp / Control	HPOL_0001399901-mRNA-1;Nippo_chrIII.g5820.t1;Nippo_chrIII.g5820.t3	HPOL_0001399901-mRNA-1;Nippo_chrIII.g5820.t1;Nippo_chrIII.g5820.t3	-1.19814	1.19814	0.000798455	0.00170033	12	NaN	transcript=HPOL_0001399901-mRNA-1;transcript=Nippo_chrIII.g5820.t1;transcript=Nippo_chrIII.g5820.t3	gene=HPOL_0001399901;gene=Nippo_chrIII.g5820;gene=Nippo_chrIII.g5820	NaN	2	-56.4164	0.435836	Hp	Control	NaN	NaN	NaN
Nb / Hp	Q80VA0	Q80VA0	-1.42935	1.42935	0.000798514	0.00170033	12	Q80VA0	Galnt7	N-acetylgalactosaminyltransferase 7	GALT7_MOUSE	31	-62.8703	0.371297	Nb	Hp	NaN	NaN	NaN
Nb / Control	Q99PG2	Q99PG2	2.23403	2.23403	0.000797498	0.00170033	12	Q99PG2	Ogfr	Opioid growth factor receptor	OGFR_MOUSE	2	370.448	4.70448	Nb	Control	NaN	NaN	NaN
Nb / Hp	Q9Z0H3	Q9Z0H3	-0.729497	0.729497	0.000797892	0.00170033	12	Q9Z0H3	Smarcb1	SWI/SNF-related matrix-associated actin-dependent regulator of chromatin subfamily B member 1	SNF5_MOUSE	12	-39.6886	0.603114	Nb	Hp	NaN	NaN	NaN
Nb / Hp	P70268	P70268	1.06817	1.06817	0.000799695	0.00170186	12	P70268	Pkn1	Serine/threonine-protein kinase N1	PKN1_MOUSE	10	109.676	2.09676	Nb	Hp	NaN	NaN	NaN
Nb / Hp	Q9R1J0	Q9R1J0	-1.18622	1.18622	0.000802549	0.00170693	12	Q9R1J0	Nsdhl	Sterol-4-alpha-carboxylate 3-dehydrogenase, decarboxylating	NSDHL_MOUSE	20	-56.0548	0.439452	Nb	Hp	NaN	NaN	NaN
Nb / Hp	P70677	P70677	2.87942	2.87942	0.000804131	0.0017093	12	P70677	Casp3	Caspase-3	CASP3_MOUSE	5	635.853	7.35853	Nb	Hp	NaN	NaN	NaN
Nb / Hp	Q922R8	Q922R8	-0.721343	0.721343	0.00080465	0.00170941	12	Q922R8	Pdia6	Protein disulfide-isomerase A6	PDIA6_MOUSE	24	-39.3467	0.606533	Nb	Hp	NaN	NaN	NaN
Nb / Hp	P47911	P47911	1.02621	1.02621	0.000805288	0.00170978	12	P47911	Rpl6	Large ribosomal subunit protein eL6	RL6_MOUSE	22	103.666	2.03666	Nb	Hp	NaN	NaN	NaN
Nb / Hp	P60060	P60060	-1.35613	1.35613	0.000810032	0.00171885	12	P60060	Sec61g	Protein transport protein Sec61 subunit gamma	SC61G_MOUSE	3	-60.9373	0.390627	Nb	Hp	NaN	NaN	NaN
Nb / Hp	Q3SZV7	Q3SZV7	-1.005	1.005	0.000810996	0.00171989	12	NaN	TREMBL:Q3SZV7	(Bos taurus) Similar to hemopexin	NaN	17	-50.1731	0.498269	Nb	Hp	NaN	NaN	NaN
Nb / Hp	P30999	P30999	0.751369	0.751369	0.000811987	0.00172041	12	P30999	Ctnnd1	Catenin delta-1	CTND1_MOUSE	27	68.339	1.68339	Nb	Hp	NaN	NaN	NaN
Hp / Control	Q8R016	Q8R016	-0.683659	0.683659	0.000812182	0.00172041	12	Q8R016	Blmh	Bleomycin hydrolase	BLMH_MOUSE	14	-37.7416	0.622584	Hp	Control	NaN	NaN	NaN
Nb / Hp	A2AUU0	A2AUU0	-1.21512	1.21512	0.000814756	0.00172487	12	A2AUU0	Mettl8	tRNA N(3)-methylcytidine methyltransferase METTL8, mitochondrial	METL8_MOUSE	3	-56.9262	0.430738	Nb	Hp	NaN	NaN	NaN
Nb / Hp	P46638	P46638	-0.41404	0.41404	0.000817824	0.00172909	12	P46638	Rab11b	Ras-related protein Rab-11B	RB11B_MOUSE	16	-24.9481	0.750519	Nb	Hp	NaN	NaN	NaN
Nb / Hp	Q6X893	Q6X893	-0.801248	0.801248	0.000818582	0.00172909	12	Q6X893	Slc44a1	Choline transporter-like protein 1	CTL1_MOUSE	9	-42.6148	0.573852	Nb	Hp	NaN	NaN	NaN
Nb / Control	Q8BSK8	Q8BSK8	1.60373	1.60373	0.000818644	0.00172909	12	Q8BSK8	Rps6kb1	Ribosomal protein S6 kinase beta-1	KS6B1_MOUSE	2	203.929	3.03929	Nb	Control	NaN	NaN	NaN
Nb / Control	Q9QZ49	Q9QZ49	-2.47938	2.47938	0.000818217	0.00172909	12	Q9QZ49	Ubxn8	UBX domain-containing protein 8	UBXN8_MOUSE	3	-82.0678	0.179322	Nb	Control	NaN	NaN	NaN
Nb / Hp	Q9R0Q3	Q9R0Q3	-0.869781	0.869781	0.000821718	0.00173429	12	Q9R0Q3	Tmed2	Transmembrane emp24 domain-containing protein 2	TMED2_MOUSE	8	-45.277	0.54723	Nb	Hp	NaN	NaN	NaN
Nb / Control	Q9Z0V8	Q9Z0V8	-0.78315	0.78315	0.000822057	0.00173429	12	Q9Z0V8	Timm17a	Mitochondrial import inner membrane translocase subunit Tim17-A	TI17A_MOUSE	4	-41.8903	0.581097	Nb	Control	NaN	NaN	NaN
Nb / Control	P63085	P63085	1.7409	1.7409	0.000822696	0.00173464	12	P63085	Mapk1	Mitogen-activated protein kinase 1	MK01_MOUSE	10	234.245	3.34245	Nb	Control	NaN	NaN	NaN
Nb / Hp	Q9QXY9	Q9QXY9	-1.52235	1.52235	0.000823176	0.00173465	12	Q9QXY9	Pex3	Peroxisomal biogenesis factor 3	PEX3_MOUSE	5	-65.1882	0.348118	Nb	Hp	NaN	NaN	NaN
Nb / Hp	P21440	P21440	0.928133	0.928133	0.000824156	0.00173572	12	P21440	Abcb4	Phosphatidylcholine translocator ABCB4	MDR3_MOUSE	5	90.2812	1.90281	Nb	Hp	NaN	NaN	NaN
Nb / Control	O88569	O88569	0.976135	0.976135	0.000831719	0.00174987	12	O88569	Hnrnpa2b1	Heterogeneous nuclear ribonucleoproteins A2/B1	ROA2_MOUSE	30	96.7189	1.96719	Nb	Control	NaN	NaN	NaN
Hp / Control	P63168	P63168	0.549828	0.549828	0.000831836	0.00174987	12	P63168	Dynll1	Dynein light chain 1, cytoplasmic	DYL1_MOUSE	2	46.3911	1.46391	Hp	Control	NaN	NaN	NaN
Nb / Hp	O70378	O70378	-0.635398	0.635398	0.000833875	0.00175166	12	O70378	Emc8	ER membrane protein complex subunit 8	EMC8_MOUSE	7	-35.6237	0.643763	Nb	Hp	NaN	NaN	NaN
Nb / Hp	Q3URS9	Q3URS9	-0.807062	0.807062	0.000834604	0.00175166	12	Q3URS9	Ccdc51	Mitochondrial potassium channel	MITOK_MOUSE	11	-42.8455	0.571545	Nb	Hp	NaN	NaN	NaN
Nb / Hp	Q8R016	Q8R016	2.39197	2.39197	0.000834595	0.00175166	12	Q8R016	Blmh	Bleomycin hydrolase	BLMH_MOUSE	14	424.873	5.24873	Nb	Hp	NaN	NaN	NaN
Nb / Hp	Q9WVE8	Q9WVE8	1.6193	1.6193	0.000834477	0.00175166	12	Q9WVE8	Pacsin2	Protein kinase C and casein kinase substrate in neurons protein 2	PACN2_MOUSE	12	207.227	3.07227	Nb	Hp	NaN	NaN	NaN
Nb / Hp	Q8CI78	Q8CI78	-1.2638	1.2638	0.000835456	0.00175244	12	Q8CI78	Rmnd1	Required for meiotic nuclear division protein 1 homolog	RMND1_MOUSE	4	-58.3554	0.416446	Nb	Hp	NaN	NaN	NaN
Nb / Hp	P32921	P32921	1.3488	1.3488	0.000836962	0.00175359	12	P32921	Wars1	Tryptophan--tRNA ligase, cytoplasmic	SYWC_MOUSE	21	154.699	2.54699	Nb	Hp	NaN	NaN	NaN
Nb / Control	Q8BYC6	Q8BYC6	1.67198	1.67198	0.000836772	0.00175359	12	Q8BYC6	Taok3	Serine/threonine-protein kinase TAO3	TAOK3_MOUSE	4	218.651	3.18651	Nb	Control	NaN	NaN	NaN
Nb / Hp	Q8BJU9	Q8BJU9	-0.870712	0.870712	0.000837539	0.00175379	12	Q8BJU9	Mtrf1l	Peptide chain release factor 1-like, mitochondrial	RF1ML_MOUSE	6	-45.3123	0.546877	Nb	Hp	NaN	NaN	NaN
Nb / Hp	Q64105	Q64105	2.1533	2.1533	0.000840016	0.0017551	12	Q64105	Spr	Sepiapterin reductase	SPRE_MOUSE	12	344.844	4.44844	Nb	Hp	NaN	NaN	NaN
Nb / Control	Q99K23	Q99K23	-1.0573	1.0573	0.000839232	0.0017551	12	Q99K23	Ufsp2	Ufm1-specific protease 2	UFSP2_MOUSE	18	-51.9469	0.480531	Nb	Control	NaN	NaN	NaN
Nb / Hp	Q99KK9	Q99KK9	-0.724753	0.724753	0.00083906	0.0017551	12	Q99KK9	Hars2	Histidine--tRNA ligase, mitochondrial	SYHM_MOUSE	11	-39.4899	0.605101	Nb	Hp	NaN	NaN	NaN
Nb / Control	Q9JKV1	Q9JKV1	0.679227	0.679227	0.000840083	0.0017551	12	Q9JKV1	Adrm1	Proteasomal ubiquitin receptor ADRM1	ADRM1_MOUSE	6	60.1281	1.60128	Nb	Control	NaN	NaN	NaN
Nb / Hp	Q9QXZ0	Q9QXZ0	0.487117	0.487117	0.000841624	0.00175731	12	Q9QXZ0	Macf1	Microtubule-actin cross-linking factor 1, isoforms 1/2/3/4	MACF1_MOUSE	119	40.1641	1.40164	Nb	Hp	NaN	NaN	NaN
Nb / Control	Q9CX56	Q9CX56	1.3386	1.3386	0.000843493	0.00176021	12	Q9CX56	Psmd8	26S proteasome non-ATPase regulatory subunit 8	PSMD8_MOUSE	9	152.906	2.52906	Nb	Control	NaN	NaN	NaN
Nb / Hp	Q0VCM5	Q0VCM5	-2.63066	2.63066	0.000845078	0.0017615	12	NaN	TREMBL:Q0VCM5	(Bos taurus) Similar to Inter-alpha-trypsin inhibitor heavy chain H1	NaN	10	-83.853	0.16147	Nb	Hp	NaN	NaN	NaN
Nb / Hp	Q9QY73	Q9QY73	-1.64987	1.64987	0.000844996	0.0017615	12	Q9QY73	Tmem59	Transmembrane protein 59	TMM59_MOUSE	2	-68.133	0.31867	Nb	Hp	NaN	NaN	NaN
Nb / Hp	Q3ULJ0	Q3ULJ0	1.44621	1.44621	0.000847871	0.00176632	12	Q3ULJ0	Gpd1l	Glycerol-3-phosphate dehydrogenase 1-like protein	GPD1L_MOUSE	10	172.492	2.72492	Nb	Hp	NaN	NaN	NaN
Nb / Hp	P14131	P14131	0.633016	0.633016	0.000849598	0.00176891	12	P14131	Rps16	Small ribosomal subunit protein uS9	RS16_MOUSE	15	55.0804	1.5508	Nb	Hp	NaN	NaN	NaN
Nb / Hp	O08583	O08583	-1.68189	1.68189	0.000851937	0.00177277	12	O08583	Alyref	THO complex subunit 4	THOC4_MOUSE	9	-68.8325	0.311675	Nb	Hp	NaN	NaN	NaN
Nb / Hp	Q9Z2A7	Q9Z2A7	-1.45638	1.45638	0.000854328	0.00177673	12	Q9Z2A7	Dgat1	Diacylglycerol O-acyltransferase 1	DGAT1_MOUSE	4	-63.5594	0.364406	Nb	Hp	NaN	NaN	NaN
Nb / Hp	Q505B7	Q505B7	2.31182	2.31182	0.000856456	0.00178014	12	Q505B7	Zbtb8os	Protein archease	ARCH_MOUSE	2	396.508	4.96508	Nb	Hp	NaN	NaN	NaN
Nb / Control	Q810B6	Q810B6	1.04846	1.04846	0.000857268	0.00178082	12	Q810B6	Ankfy1	Rabankyrin-5	ANFY1_MOUSE	11	106.832	2.06832	Nb	Control	NaN	NaN	NaN
Nb / Control	P70245	P70245	-0.601403	0.601403	0.000860196	0.00178588	12	P70245	Ebp	3-beta-hydroxysteroid-Delta(8),Delta(7)-isomerase	EBP_MOUSE	3	-34.0887	0.659113	Nb	Control	NaN	NaN	NaN
Nb / Control	Q61035	Q61035	1.4515	1.4515	0.000861956	0.00178764	12	Q61035	Hars1	Histidine--tRNA ligase, cytoplasmic	HARS1_MOUSE	24	173.491	2.73491	Nb	Control	NaN	NaN	NaN
Nb / Hp	Q9ERE7	Q9ERE7	-1.34874	1.34874	0.000862022	0.00178764	12	Q9ERE7	Mesd	LRP chaperone MESD	MESD_MOUSE	5	-60.7366	0.392634	Nb	Hp	NaN	NaN	NaN
Hp / Control	Q01965	Q01965	0.696655	0.696655	0.000862853	0.00178835	12	Q01965	Ly9	T-lymphocyte surface antigen Ly-9	LY9_MOUSE	7	62.0742	1.62074	Hp	Control	NaN	NaN	NaN
Nb / Hp	Q91YI4	Q91YI4	1.76598	1.76598	0.000864847	0.00179147	12	Q91YI4	Arrb2	Beta-arrestin-2	ARRB2_MOUSE	10	240.106	3.40106	Nb	Hp	NaN	NaN	NaN
Nb / Hp	Q9CQW0	Q9CQW0	-1.20722	1.20722	0.000865672	0.00179216	12	Q9CQW0	Emc6	ER membrane protein complex subunit 6	EMC6_MOUSE	3	-56.6898	0.433102	Nb	Hp	NaN	NaN	NaN
Nb / Control	Q3ZBS7	Q3ZBS7	-3.04077	3.04077	0.000866936	0.00179275	12	NaN	TREMBL:Q3ZBS7	(Bos taurus) Vitronectin	NaN	10	-87.8483	0.121517	Nb	Control	NaN	NaN	NaN
Nb / Hp	Q8R3N1	Q8R3N1	-1.0727	1.0727	0.000866479	0.00179275	12	Q8R3N1	Nop14	Nucleolar protein 14	NOP14_MOUSE	21	-52.4573	0.475427	Nb	Hp	NaN	NaN	NaN
Nb / Hp	Q8R574	Q8R574	1.40437	1.40437	0.000868639	0.00179525	12	Q8R574	Prpsap2	Phosphoribosyl pyrophosphate synthase-associated protein 2	KPRB_MOUSE	8	164.701	2.64701	Nb	Hp	NaN	NaN	NaN
Nb / Hp	Q61490	Q61490	-0.508752	0.508752	0.000871822	0.00180081	12	Q61490	Alcam	CD166 antigen	CD166_MOUSE	13	-29.717	0.70283	Nb	Hp	NaN	NaN	NaN
Nb / Hp	Q6P5G3	Q6P5G3	1.17741	1.17741	0.000875179	0.00180673	12	Q6P5G3	Mbtd1	MBT domain-containing protein 1	MBTD1_MOUSE	2	126.171	2.26171	Nb	Hp	NaN	NaN	NaN
Nb / Hp	Q3UA06	Q3UA06	1.68295	1.68295	0.000877721	0.00180993	12	Q3UA06	Trip13	Pachytene checkpoint protein 2 homolog	PCH2_MOUSE	11	221.084	3.21084	Nb	Hp	NaN	NaN	NaN
Nb / Hp	Q8BUY5	Q8BUY5	-1.12474	1.12474	0.000877258	0.00180993	12	Q8BUY5	Timmdc1	Complex I assembly factor TIMMDC1, mitochondrial	TIDC1_MOUSE	7	-54.1415	0.458585	Nb	Hp	NaN	NaN	NaN
Nb / Hp	HPOL_0000232001-mRNA-1	HPOL_0000232001-mRNA-1	-1.49667	1.49667	0.000880016	0.00181349	12	NaN	transcript=HPOL_0000232001-mRNA-1	gene=HPOL_0000232001	NaN	2	-64.5629	0.354371	Nb	Hp	NaN	NaN	NaN
Nb / Control	P48036	P48036	1.58432	1.58432	0.000880569	0.00181349	12	P48036	Anxa5	Annexin A5	ANXA5_MOUSE	30	199.865	2.99865	Nb	Control	NaN	NaN	NaN
Nb / Hp	Q4PJX1	Q4PJX1	-0.914725	0.914725	0.000880936	0.00181349	12	Q4PJX1	Odr4	Protein odr-4 homolog	ODR4_MOUSE	12	-46.9555	0.530445	Nb	Hp	NaN	NaN	NaN
Nb / Control	D3YZP9	D3YZP9	1.99173	1.99173	0.000881449	0.00181352	12	D3YZP9	Ccdc6	Coiled-coil domain-containing protein 6	CCDC6_MOUSE	6	297.713	3.97713	Nb	Control	NaN	NaN	NaN
Nb / Hp	P05064	P05064	2.18908	2.18908	0.00088685	0.00182111	12	P05064	Aldoa	Fructose-bisphosphate aldolase A	ALDOA_MOUSE	32	356.016	4.56016	Nb	Hp	NaN	NaN	NaN
Nb / Hp	P17751	P17751	2.03115	2.03115	0.000886697	0.00182111	12	P17751	Tpi1	Triosephosphate isomerase	TPIS_MOUSE	18	308.729	4.08729	Nb	Hp	NaN	NaN	NaN
Nb / Hp	Q60664	Q60664	-1.49001	1.49001	0.000886822	0.00182111	12	Q60664	Irag2	Inositol 1,4,5-triphosphate receptor associated 2	IRAG2_MOUSE	15	-64.3991	0.356009	Nb	Hp	NaN	NaN	NaN
Nb / Hp	Q9ESW4	Q9ESW4	-1.09473	1.09473	0.000887132	0.00182111	12	Q9ESW4	Agk	Acylglycerol kinase, mitochondrial	AGK_MOUSE	18	-53.1777	0.468223	Nb	Hp	NaN	NaN	NaN
Nb / Control	Q8R4R6	Q8R4R6	-2.4466	2.4466	0.000891119	0.00182827	12	Q8R4R6	Nup35	Nucleoporin NUP35	NUP35_MOUSE	9	-81.6558	0.183442	Nb	Control	NaN	NaN	NaN
Nb / Hp	Q8R4G6	Q8R4G6	-1.52139	1.52139	0.000893051	0.00183121	12	Q8R4G6	Mgat5	Alpha-1,6-mannosylglycoprotein 6-beta-N-acetylglucosaminyltransferase A	MGT5A_MOUSE	8	-65.1649	0.348351	Nb	Hp	NaN	NaN	NaN
Nb / Control	Q9CQ88	Q9CQ88	-2.14568	2.14568	0.000896605	0.00183746	12	Q9CQ88	Tspan31	Tetraspanin-31	TSN31_MOUSE	2	-77.4011	0.225989	Nb	Control	NaN	NaN	NaN
Nb / Hp	Q80ZW2	Q80ZW2	-0.882323	0.882323	0.000898141	0.00183855	12	Q80ZW2	Them6	Protein THEM6	THEM6_MOUSE	6	-45.7507	0.542493	Nb	Hp	NaN	NaN	NaN
Nb / Hp	Q9CQ06	Q9CQ06	-0.584765	0.584765	0.000897773	0.00183855	12	Q9CQ06	Mrpl24	Large ribosomal subunit protein uL24m	RM24_MOUSE	8	-33.3242	0.666758	Nb	Hp	NaN	NaN	NaN
Hp / Control	Q8K0C4	Q8K0C4	1.12266	1.12266	0.000904202	0.00184992	12	Q8K0C4	Cyp51a1	Lanosterol 14-alpha demethylase	CP51A_MOUSE	24	117.748	2.17748	Hp	Control	NaN	NaN	NaN
Nb / Hp	Q8VDN2	Q8VDN2	-0.433242	0.433242	0.000906153	0.00185287	12	Q8VDN2	Atp1a1	Sodium/potassium-transporting ATPase subunit alpha-1	AT1A1_MOUSE	35	-25.9404	0.740596	Nb	Hp	NaN	NaN	NaN
Nb / Hp	Q8K358	Q8K358	-0.725925	0.725925	0.000909517	0.00185587	12	Q8K358	Pigu	Phosphatidylinositol glycan anchor biosynthesis class U protein	PIGU_MOUSE	5	-39.5391	0.604609	Nb	Hp	NaN	NaN	NaN
Nb / Control	Q8R574	Q8R574	1.44313	1.44313	0.00090965	0.00185587	12	Q8R574	Prpsap2	Phosphoribosyl pyrophosphate synthase-associated protein 2	KPRB_MOUSE	8	171.91	2.7191	Nb	Control	NaN	NaN	NaN
Nb / Hp	Q9DCA5	Q9DCA5	-0.245201	0.245201	0.000909103	0.00185587	12	Q9DCA5	Brix1	Ribosome biogenesis protein BRX1 homolog	BRX1_MOUSE	15	-15.6302	0.843698	Nb	Hp	NaN	NaN	NaN
Nb / Control	Q9R1J0	Q9R1J0	-0.590219	0.590219	0.000908515	0.00185587	12	Q9R1J0	Nsdhl	Sterol-4-alpha-carboxylate 3-dehydrogenase, decarboxylating	NSDHL_MOUSE	20	-33.5758	0.664242	Nb	Control	NaN	NaN	NaN
Nb / Hp	P56399	P56399	1.50767	1.50767	0.000911758	0.00185913	12	P56399	Usp5	Ubiquitin carboxyl-terminal hydrolase 5	UBP5_MOUSE	27	184.351	2.84351	Nb	Hp	NaN	NaN	NaN
Nb / Hp	Q8JZQ9	Q8JZQ9	1.43374	1.43374	0.00091289	0.0018604	12	Q8JZQ9	Eif3b	Eukaryotic translation initiation factor 3 subunit B	EIF3B_MOUSE	37	170.147	2.70147	Nb	Hp	NaN	NaN	NaN
Hp / Control	Q64729	Q64729	1.72228	1.72228	0.000913867	0.00186136	12	Q64729	Tgfbr1	TGF-beta receptor type-1	TGFR1_MOUSE	3	229.958	3.29958	Hp	Control	NaN	NaN	NaN
Nb / Hp	O54782	O54782	1.06814	1.06814	0.000918848	0.00186953	12	O54782	Man2b2	Epididymis-specific alpha-mannosidase	MA2B2_MOUSE	12	109.672	2.09672	Nb	Hp	NaN	NaN	NaN
Nb / Control	P84084	P84084	1.66015	1.66015	0.000918902	0.00186953	12	P84084	Arf5	ADP-ribosylation factor 5	ARF5_MOUSE	5	216.05	3.1605	Nb	Control	NaN	NaN	NaN
Nb / Hp	P62849	P62849	0.826069	0.826069	0.000924296	0.00187703	12	P62849	Rps24	Small ribosomal subunit protein eS24	RS24_MOUSE	6	77.2848	1.77285	Nb	Hp	NaN	NaN	NaN
Nb / Control	Q61183	Q61183	1.73654	1.73654	0.000923167	0.00187703	12	Q61183	Papola	Poly(A) polymerase alpha	PAPOA_MOUSE	12	233.235	3.33235	Nb	Control	NaN	NaN	NaN
Nb / Hp	Q6ZWN5	Q6ZWN5	1.32608	1.32608	0.000924557	0.00187703	12	Q6ZWN5	Rps9	Small ribosomal subunit protein uS4	RS9_MOUSE	22	150.72	2.5072	Nb	Hp	NaN	NaN	NaN
Nb / Control	Q8BXV2	Q8BXV2	-0.506818	0.506818	0.000924643	0.00187703	12	Q8BXV2	Bri3bp	BRI3-binding protein	BRI3B_MOUSE	6	-29.6227	0.703773	Nb	Control	NaN	NaN	NaN
Nb / Hp	O35972	O35972	-0.690994	0.690994	0.000925897	0.00187749	12	O35972	Mrpl23	Large ribosomal subunit protein uL23m	RM23_MOUSE	6	-38.0573	0.619427	Nb	Hp	NaN	NaN	NaN
Nb / Control	Q9Z1N5	Q9Z1N5	1.70583	1.70583	0.000925803	0.00187749	12	Q9Z1N5	Ddx39b	Spliceosome RNA helicase Ddx39b	DX39B_MOUSE	27	226.217	3.26217	Nb	Control	NaN	NaN	NaN
Nb / Hp	Q99LF4	Q99LF4	0.628695	0.628695	0.000927581	0.00187986	12	Q99LF4	Rtcb	RNA-splicing ligase RtcB homolog	RTCB_MOUSE	25	54.6165	1.54617	Nb	Hp	NaN	NaN	NaN
Nb / Hp	Q3TUH1	Q3TUH1	-0.26344	0.26344	0.000928644	0.00188097	12	Q3TUH1	Tamm41	Phosphatidate cytidylyltransferase, mitochondrial	TAM41_MOUSE	9	-16.6901	0.833099	Nb	Hp	NaN	NaN	NaN
Nb / Hp	Q9D4H1	Q9D4H1	2.98257	2.98257	0.000929598	0.00188186	12	Q9D4H1	Exoc2	Exocyst complex component 2	EXOC2_MOUSE	3	690.395	7.90395	Nb	Hp	NaN	NaN	NaN
Nb / Hp	Q8BU11	Q8BU11	-0.967195	0.967195	0.000930454	0.00188255	12	Q8BU11	Tox4	TOX high mobility group box family member 4	TOX4_MOUSE	6	-48.85	0.5115	Nb	Hp	NaN	NaN	NaN
Nb / Hp	Q3UV17	Q3UV17	-1.11023	1.11023	0.000936088	0.0018929	12	Q3UV17	Krt76	Keratin, type II cytoskeletal 2 oral	K22O_MOUSE	2	-53.678	0.46322	Nb	Hp	NaN	NaN	NaN
Nb / Hp	Q8K2I1	Q8K2I1	2.49646	2.49646	0.00093999	0.00189974	12	Q8K2I1	Fntb	Protein farnesyltransferase subunit beta	FNTB_MOUSE	2	464.298	5.64298	Nb	Hp	NaN	NaN	NaN
Nb / Hp	Nippo_chrII.g4396.t1	Nippo_chrII.g4396.t1	-1.04199	1.04199	0.000943628	0.00190604	12	NaN	transcript=Nippo_chrII.g4396.t1	gene=Nippo_chrII.g4396	NaN	2	-51.4344	0.485656	Nb	Hp	NaN	NaN	NaN
Hp / Control	P41233	P41233	2.58375	2.58375	0.000949898	0.00191725	12	P41233	Abca1	Phospholipid-transporting ATPase ABCA1	ABCA1_MOUSE	4	499.494	5.99494	Hp	Control	NaN	NaN	NaN
Hp / Control	Q64012	Q64012	1.2464	1.2464	0.000950232	0.00191725	12	Q64012	Raly	RNA-binding protein Raly	RALY_MOUSE	26	137.249	2.37249	Hp	Control	NaN	NaN	NaN
Nb / Hp	Q61165	Q61165	-1.97876	1.97876	0.00095122	0.00191819	12	Q61165	Slc9a1	Sodium/hydrogen exchanger 1	SL9A1_MOUSE	3	-74.6292	0.253708	Nb	Hp	NaN	NaN	NaN
Nb / Control	P14131	P14131	1.07992	1.07992	0.000952148	0.00191823	12	P14131	Rps16	Small ribosomal subunit protein uS9	RS16_MOUSE	15	111.392	2.11392	Nb	Control	NaN	NaN	NaN
Nb / Control	Q3TFQ1	Q3TFQ1	-1.25574	1.25574	0.000952816	0.00191823	12	Q3TFQ1	Spryd7	SPRY domain-containing protein 7	SPRY7_MOUSE	2	-58.122	0.41878	Nb	Control	NaN	NaN	NaN
Hp / Control	Q9Z2D8	Q9Z2D8	1.0346	1.0346	0.00095231	0.00191823	12	Q9Z2D8	Mbd3	Methyl-CpG-binding domain protein 3	MBD3_MOUSE	6	104.855	2.04855	Hp	Control	NaN	NaN	NaN
Nb / Hp	Q9QZK7	Q9QZK7	-0.471858	0.471858	0.000954155	0.00191987	12	Q9QZK7	Dok3	Docking protein 3	DOK3_MOUSE	6	-27.8965	0.721035	Nb	Hp	NaN	NaN	NaN
Nb / Hp	Q6ZPJ3	Q6ZPJ3	1.74001	1.74001	0.000955182	0.00192088	12	Q6ZPJ3	Ube2o	(E3-independent) E2 ubiquitin-conjugating enzyme UBE2O	UBE2O_MOUSE	9	234.037	3.34037	Nb	Hp	NaN	NaN	NaN
Hp / Control	Q9CX86	Q9CX86	2.16314	2.16314	0.000956356	0.00192218	12	Q9CX86	Hnrnpa0	Heterogeneous nuclear ribonucleoprotein A0	ROA0_MOUSE	12	347.887	4.47887	Hp	Control	NaN	NaN	NaN
Hp / Control	Q8BWU5	Q8BWU5	-0.536369	0.536369	0.000957997	0.00192442	12	Q8BWU5	Osgep	tRNA N6-adenosine threonylcarbamoyltransferase	OSGEP_MOUSE	9	-31.0496	0.689504	Hp	Control	NaN	NaN	NaN
Nb / Control	Q3SZH5	Q3SZH5	-1.75299	1.75299	0.000961208	0.00192981	12	NaN	TREMBL:Q3SZH5	(Bos taurus) Similar to Angiotensinogen	NaN	12	-70.3314	0.296686	Nb	Control	NaN	NaN	NaN
Nb / Hp	P17690	P17690	-2.3454	2.3454	0.000962755	0.00193185	12	NaN	SWISS-PROT:P17690	(Bos taurus) Beta-2-glycoprotein 1 precursor	NaN	11	-80.3227	0.196773	Nb	Hp	NaN	NaN	NaN
Nb / Hp	Q32PI4	Q32PI4	-1.83454	1.83454	0.000966479	0.00193826	12	NaN	TREMBL:Q32PI4	(Bos taurus) Similar to complement factor I	NaN	6	-71.9619	0.280381	Nb	Hp	NaN	NaN	NaN
Nb / Hp	P61089	P61089	1.90319	1.90319	0.000967843	0.00193993	12	P61089	Ube2n	Ubiquitin-conjugating enzyme E2 N	UBE2N_MOUSE	7	274.039	3.74039	Nb	Hp	NaN	NaN	NaN
Nb / Hp	Q6PDQ2	Q6PDQ2	-0.645407	0.645407	0.000968753	0.00194069	12	Q6PDQ2	Chd4	Chromodomain-helicase-DNA-binding protein 4	CHD4_MOUSE	53	-36.0688	0.639312	Nb	Hp	NaN	NaN	NaN
Nb / Hp	Q9WVL0	Q9WVL0	0.900082	0.900082	0.00097014	0.00194241	12	Q9WVL0	Gstz1	Maleylacetoacetate isomerase	MAAI_MOUSE	5	86.6172	1.86617	Nb	Hp	NaN	NaN	NaN
Nb / Hp	Q91WF7	Q91WF7	0.316774	0.316774	0.000970758	0.00194258	12	Q91WF7	Fig4	Polyphosphoinositide phosphatase	FIG4_MOUSE	3	24.5542	1.24554	Nb	Hp	NaN	NaN	NaN
Nb / Control	Q2KJC7	Q2KJC7	-1.25412	1.25412	0.000973121	0.00194624	12	NaN	TREMBL:Q2KJC7;Q8HZM3	(Bos taurus) Periostin, osteoblast specific factor	NaN	6	-58.0751	0.419249	Nb	Control	NaN	NaN	NaN
Nb / Control	P54116	P54116	-0.457957	0.457957	0.000978581	0.00195076	12	P54116	Stom	Stomatin	STOM_MOUSE	14	-27.1983	0.728017	Nb	Control	NaN	NaN	NaN
Hp / Control	P62983	P62983	1.30182	1.30182	0.000978246	0.00195076	12	P62983	Rps27a	Ubiquitin-ribosomal protein eS31 fusion protein	RS27A_MOUSE	12	146.539	2.46539	Hp	Control	NaN	NaN	NaN
Nb / Hp	Q64430	Q64430	-0.72857	0.72857	0.000978141	0.00195076	12	Q64430	Atp7a	Copper-transporting ATPase 1	ATP7A_MOUSE	7	-39.6498	0.603502	Nb	Hp	NaN	NaN	NaN
Nb / Control	Q8BHG1	Q8BHG1	1.67825	1.67825	0.000976414	0.00195076	12	Q8BHG1	Nrdc	Nardilysin	NRDC_MOUSE	16	220.039	3.20039	Nb	Control	NaN	NaN	NaN
Hp / Control	Q8BV13	Q8BV13	0.447757	0.447757	0.000978354	0.00195076	12	Q8BV13	Cops7b	COP9 signalosome complex subunit 7b	CSN7B_MOUSE	4	36.3918	1.36392	Hp	Control	NaN	NaN	NaN
Nb / Hp	Q8K327	Q8K327	-1.60789	1.60789	0.000977066	0.00195076	12	Q8K327	Champ1	Chromosome alignment-maintaining phosphoprotein 1	CHAP1_MOUSE	8	-67.1921	0.328079	Nb	Hp	NaN	NaN	NaN
Nb / Hp	P16110	P16110	2.34848	2.34848	0.000980153	0.00195282	12	P16110	Lgals3	Galectin-3	LEG3_MOUSE	6	409.287	5.09287	Nb	Hp	NaN	NaN	NaN
Nb / Hp	P53986	P53986	-0.653226	0.653226	0.00098139	0.00195422	12	P53986	Slc16a1	Monocarboxylate transporter 1	MOT1_MOUSE	9	-36.4143	0.635857	Nb	Hp	NaN	NaN	NaN
Nb / Hp	Q3ZBD7	Q3ZBD7	2.38315	2.38315	0.000984262	0.00195887	12	NaN	SWISS-PROT:Q3ZBD7	(Bos taurus) Glucose-6-phosphate isomerase	NaN	9	421.675	5.21675	Nb	Hp	NaN	NaN	NaN
Nb / Hp	Q9D136	Q9D136	-0.845682	0.845682	0.000985675	0.00196062	12	Q9D136	Ogfod3	2-oxoglutarate and iron-dependent oxygenase domain-containing protein 3	OGFD3_MOUSE	7	-44.3552	0.556448	Nb	Hp	NaN	NaN	NaN
Nb / Control	Q8VDW0	Q8VDW0	1.65113	1.65113	0.000987067	0.00196232	12	Q8VDW0	Ddx39a	ATP-dependent RNA helicase DDX39A	DX39A_MOUSE	11	214.08	3.1408	Nb	Control	NaN	NaN	NaN
Nb / Control	Q9R0C8	Q9R0C8	1.68303	1.68303	0.000989088	0.00196527	12	Q9R0C8	Vav3	Guanine nucleotide exchange factor VAV3	VAV3_MOUSE	3	221.101	3.21101	Nb	Control	NaN	NaN	NaN
Nb / Hp	Q3UFM5	Q3UFM5	-0.51727	0.51727	0.000989947	0.00196591	12	Q3UFM5	Nom1	Nucleolar MIF4G domain-containing protein 1	NOM1_MOUSE	9	-30.1307	0.698693	Nb	Hp	NaN	NaN	NaN
Hp / Control	Q9JKV1	Q9JKV1	0.345956	0.345956	0.000990583	0.0019661	12	Q9JKV1	Adrm1	Proteasomal ubiquitin receptor ADRM1	ADRM1_MOUSE	6	27.0993	1.27099	Hp	Control	NaN	NaN	NaN
Hp / Control	P28800	P28800	1.6334	1.6334	0.000993931	0.00197061	12	NaN	SWISS-PROT:P28800	(Bos taurus) Alpha-2-antiplasmin precursor	NaN	13	210.242	3.10242	Hp	Control	NaN	NaN	NaN
Nb / Hp	Q9JMA2	Q9JMA2	2.78842	2.78842	0.000993675	0.00197061	12	Q9JMA2	Qtrt1	Queuine tRNA-ribosyltransferase catalytic subunit 1	TGT_MOUSE	6	590.874	6.90874	Nb	Hp	NaN	NaN	NaN
Nb / Control	Q8BWC0	Q8BWC0	-1.53504	1.53504	0.000996454	0.00197453	12	Q8BWC0	Tpcn2	Two pore channel protein 2	TPC2_MOUSE	2	-65.493	0.34507	Nb	Control	NaN	NaN	NaN
Nb / Hp	Q6PDK2	Q6PDK2	-1.55111	1.55111	0.000999284	0.00197852	12	Q6PDK2	Kmt2d	Histone-lysine N-methyltransferase 2D	KMT2D_MOUSE	2	-65.8753	0.341247	Nb	Hp	NaN	NaN	NaN
Nb / Hp	Q9Z1Q9	Q9Z1Q9	1.7402	1.7402	0.000999549	0.00197852	12	Q9Z1Q9	Vars1	Valine--tRNA ligase	SYVC_MOUSE	52	234.081	3.34081	Nb	Hp	NaN	NaN	NaN
Nb / Control	Q9EQH3	Q9EQH3	1.37825	1.37825	0.00100332	0.00198492	12	Q9EQH3	Vps35	Vacuolar protein sorting-associated protein 35	VPS35_MOUSE	21	159.953	2.59953	Nb	Control	NaN	NaN	NaN
Nb / Hp	P47757	P47757	1.3179	1.3179	0.00100512	0.0019874	12	P47757	Capzb	F-actin-capping protein subunit beta	CAPZB_MOUSE	19	149.303	2.49303	Nb	Hp	NaN	NaN	NaN
Nb / Hp	P62242	P62242	1.0501	1.0501	0.00100778	0.00199088	12	P62242	Rps8	Small ribosomal subunit protein eS8	RS8_MOUSE	17	107.067	2.07067	Nb	Hp	NaN	NaN	NaN
Nb / Hp	Q32NY4	Q32NY4	-0.916725	0.916725	0.00100797	0.00199088	12	Q32NY4	Cnnm3	Metal transporter CNNM3	CNNM3_MOUSE	9	-47.029	0.52971	Nb	Hp	NaN	NaN	NaN
Nb / Control	Q3TDN2	Q3TDN2	-0.92825	0.92825	0.00100952	0.00199286	12	Q3TDN2	Faf2	FAS-associated factor 2	FAF2_MOUSE	15	-47.4505	0.525495	Nb	Control	NaN	NaN	NaN
Nb / Control	Q9ERD7	Q9ERD7	1.13159	1.13159	0.00101067	0.00199406	12	Q9ERD7	Tubb3	Tubulin beta-3 chain	TBB3_MOUSE	7	119.1	2.191	Nb	Control	NaN	NaN	NaN
Nb / Hp	Q9CQ60	Q9CQ60	2.21216	2.21216	0.00101206	0.00199572	12	Q9CQ60	Pgls	6-phosphogluconolactonase	6PGL_MOUSE	6	363.367	4.63367	Nb	Hp	NaN	NaN	NaN
Nb / Hp	P21958	P21958	-1.43652	1.43652	0.00101473	0.0019999	12	P21958	Tap1	Antigen peptide transporter 1	TAP1_MOUSE	11	-63.0543	0.369457	Nb	Hp	NaN	NaN	NaN
Nb / Control	Q3TBD2	Q3TBD2	1.06613	1.06613	0.00101767	0.00200463	12	Q3TBD2	Arhgap45	Rho GTPase-activating protein 45	HMHA1_MOUSE	18	109.38	2.0938	Nb	Control	NaN	NaN	NaN
Nb / Hp	P10518	P10518	3.00632	3.00632	0.00102168	0.00200712	12	P10518	Alad	Delta-aminolevulinic acid dehydratase	HEM2_MOUSE	13	703.512	8.03512	Nb	Hp	NaN	NaN	NaN
Nb / Hp	P46664	P46664	2.3049	2.3049	0.00102089	0.00200712	12	P46664	Adss2	Adenylosuccinate synthetase isozyme 2	PURA2_MOUSE	17	394.134	4.94134	Nb	Hp	NaN	NaN	NaN
Nb / Hp	Q3SX09	Q3SX09	-2.53452	2.53452	0.00102113	0.00200712	12	NaN	TREMBL:Q3SX09	(Bos taurus) similar to HBG protein	NaN	10	-82.7403	0.172597	Nb	Hp	NaN	NaN	NaN
Hp / Control	Q99KV1	Q99KV1	1.0328	1.0328	0.00102169	0.00200712	12	Q99KV1	Dnajb11	DnaJ homolog subfamily B member 11	DJB11_MOUSE	15	104.6	2.046	Hp	Control	NaN	NaN	NaN
Nb / Control	Q9DBM1	Q9DBM1	-0.742344	0.742344	0.00102063	0.00200712	12	Q9DBM1	Gpatch1	G patch domain-containing protein 1	GPTC1_MOUSE	3	-40.2232	0.597768	Nb	Control	NaN	NaN	NaN
Nb / Hp	A2BH40	A2BH40	-0.791765	0.791765	0.00103016	0.0020111	12	A2BH40	Arid1a	AT-rich interactive domain-containing protein 1A	ARI1A_MOUSE	24	-42.2363	0.577637	Nb	Hp	NaN	NaN	NaN
Nb / Hp	O88738	O88738	0.794454	0.794454	0.00102585	0.0020111	12	O88738	Birc6	Baculoviral IAP repeat-containing protein 6	BIRC6_MOUSE	22	73.4421	1.73442	Nb	Hp	NaN	NaN	NaN
Nb / Hp	P53798	P53798	-1.0882	1.0882	0.00102714	0.0020111	12	P53798	Fdft1	Squalene synthase	FDFT_MOUSE	14	-52.9653	0.470347	Nb	Hp	NaN	NaN	NaN
Nb / Control	Q3U1J4	Q3U1J4	1.32557	1.32557	0.00102765	0.0020111	12	Q3U1J4	Ddb1	DNA damage-binding protein 1	DDB1_MOUSE	45	150.633	2.50633	Nb	Control	NaN	NaN	NaN
Nb / Hp	Q3UMR5	Q3UMR5	-1.45038	1.45038	0.00102813	0.0020111	12	Q3UMR5	Mcu	Calcium uniporter protein, mitochondrial	MCU_MOUSE	7	-63.4076	0.365924	Nb	Hp	NaN	NaN	NaN
Nb / Hp	Q62203	Q62203	-0.541882	0.541882	0.00102708	0.0020111	12	Q62203	Sf3a2	Splicing factor 3A subunit 2	SF3A2_MOUSE	9	-31.3126	0.686874	Nb	Hp	NaN	NaN	NaN
Nb / Hp	Q7RTT2;Q8N1N4-2	Q7RTT2;Q8N1N4-2	-1.92732	1.92732	0.00103127	0.0020111	12	NaN	TREMBL:Q7RTT2;SWISS-PROT:Q8N1N4-2	Tax_Id=9606 Gene_Symbol=KRT78 Keratin-78;Tax_Id=9606 Gene_Symbol=KRT78 Isoform 2 of Keratin, type II cytoskeletal 78	NaN	6	-73.7083	0.262917	Nb	Hp	NaN	NaN	NaN
Nb / Hp	Q8BFZ9	Q8BFZ9	-0.693951	0.693951	0.00103043	0.0020111	12	Q8BFZ9	Erlin2	Erlin-2	ERLN2_MOUSE	13	-38.1842	0.618158	Nb	Hp	NaN	NaN	NaN
Nb / Hp	Q8JZM7	Q8JZM7	-1.03194	1.03194	0.00102966	0.0020111	12	Q8JZM7	Cdc73	Parafibromin	CDC73_MOUSE	20	-51.0947	0.489053	Nb	Hp	NaN	NaN	NaN
Nb / Hp	Q8K2Z4	Q8K2Z4	1.37593	1.37593	0.00102444	0.0020111	12	Q8K2Z4	Ncapd2	Condensin complex subunit 1	CND1_MOUSE	40	159.535	2.59535	Nb	Hp	NaN	NaN	NaN
Nb / Control	Q922V4	Q922V4	-0.547748	0.547748	0.00103197	0.0020111	12	Q922V4	Plrg1	Pleiotropic regulator 1	PLRG1_MOUSE	17	-31.5913	0.684087	Nb	Control	NaN	NaN	NaN
Nb / Hp	Q9CQC9	Q9CQC9	1.36808	1.36808	0.00102621	0.0020111	12	Q9CQC9	Sar1b	Small COPII coat GTPase SAR1B	SAR1B_MOUSE	7	158.127	2.58127	Nb	Hp	NaN	NaN	NaN
Nb / Control	Q9DC69	Q9DC69	-0.296255	0.296255	0.00102963	0.0020111	12	Q9DC69	Ndufa9	NADH dehydrogenase [ubiquinone] 1 alpha subcomplex subunit 9, mitochondrial	NDUA9_MOUSE	24	-18.5636	0.814364	Nb	Control	NaN	NaN	NaN
Nb / Control	Q9JJK2	Q9JJK2	1.55101	1.55101	0.00103194	0.0020111	12	Q9JJK2	Lancl2	LanC-like protein 2	LANC2_MOUSE	4	193.022	2.93022	Nb	Control	NaN	NaN	NaN
Nb / Control	Q9R1P1	Q9R1P1	1.70175	1.70175	0.00102858	0.0020111	12	Q9R1P1	Psmb3	Proteasome subunit beta type-3	PSB3_MOUSE	10	225.294	3.25294	Nb	Control	NaN	NaN	NaN
Nb / Control	A2ASZ8	A2ASZ8	-0.790666	0.790666	0.00103309	0.00201114	12	A2ASZ8	Slc25a25	Mitochondrial adenyl nucleotide antiporter SLC25A25	SCMC2_MOUSE	4	-42.1923	0.578077	Nb	Control	NaN	NaN	NaN
Hp / Control	P24270	P24270	-0.734392	0.734392	0.00103292	0.00201114	12	P24270	Cat	Catalase	CATA_MOUSE	36	-39.8929	0.601071	Hp	Control	NaN	NaN	NaN
Nb / Hp	P62855	P62855	1.15976	1.15976	0.00103745	0.00201263	12	P62855	Rps26	Small ribosomal subunit protein eS26	RS26_MOUSE	5	123.421	2.23421	Nb	Hp	NaN	NaN	NaN
Nb / Hp	Q6PGF3	Q6PGF3	-0.981522	0.981522	0.00103591	0.00201263	12	Q6PGF3	Med16	Mediator of RNA polymerase II transcription subunit 16	MED16_MOUSE	4	-49.3555	0.506445	Nb	Hp	NaN	NaN	NaN
Nb / Control	Q8BG32	Q8BG32	1.58881	1.58881	0.00103826	0.00201263	12	Q8BG32	Psmd11	26S proteasome non-ATPase regulatory subunit 11	PSD11_MOUSE	26	200.801	3.00801	Nb	Control	NaN	NaN	NaN
Nb / Control	Q8BRG8	Q8BRG8	-1.41948	1.41948	0.00103447	0.00201263	12	Q8BRG8	Tmem209	Transmembrane protein 209	TM209_MOUSE	11	-62.6153	0.373847	Nb	Control	NaN	NaN	NaN
Nb / Hp	Q8BYR1	Q8BYR1	2.18767	2.18767	0.00103807	0.00201263	12	Q8BYR1	Lcmt2	tRNA wybutosine-synthesizing protein 4	TYW4_MOUSE	5	355.568	4.55568	Nb	Hp	NaN	NaN	NaN
Nb / Hp	Q8CIM3	Q8CIM3	-0.359986	0.359986	0.00103573	0.00201263	12	Q8CIM3	D2hgdh	D-2-hydroxyglutarate dehydrogenase, mitochondrial	D2HDH_MOUSE	6	-22.0828	0.779172	Nb	Hp	NaN	NaN	NaN
Nb / Control	Q91VK1	Q91VK1	1.4169	1.4169	0.00103607	0.00201263	12	Q91VK1	Bzw2	eIF5-mimic protein 1	5MP1_MOUSE	20	167.012	2.67012	Nb	Control	NaN	NaN	NaN
Nb / Hp	Q9CRD2	Q9CRD2	-1.23219	1.23219	0.00103686	0.00201263	12	Q9CRD2	Emc2	ER membrane protein complex subunit 2	EMC2_MOUSE	14	-57.4328	0.425672	Nb	Hp	NaN	NaN	NaN
Nb / Control	Q8BG81	Q8BG81	-1.00941	1.00941	0.00103952	0.00201399	12	Q8BG81	Poldip3	Polymerase delta-interacting protein 3	PDIP3_MOUSE	18	-50.3252	0.496748	Nb	Control	NaN	NaN	NaN
Nb / Control	Q99JW2	Q99JW2	1.71392	1.71392	0.00104102	0.00201584	12	Q99JW2	Acy1	Aminoacylase-1	ACY1_MOUSE	7	228.05	3.2805	Nb	Control	NaN	NaN	NaN
Hp / Control	P60867	P60867	0.477968	0.477968	0.00104201	0.00201669	12	P60867	Rps20	Small ribosomal subunit protein uS10	RS20_MOUSE	7	39.2781	1.39278	Hp	Control	NaN	NaN	NaN
Nb / Hp	Q9DC29	Q9DC29	-0.715179	0.715179	0.00104279	0.00201714	12	Q9DC29	Abcb6	ATP-binding cassette sub-family B member 6	ABCB6_MOUSE	17	-39.087	0.60913	Nb	Hp	NaN	NaN	NaN
Nb / Hp	Q9EPB5	Q9EPB5	-1.00552	1.00552	0.00104337	0.00201718	12	Q9EPB5	Serhl	Serine hydrolase-like protein	SERHL_MOUSE	5	-50.1909	0.498091	Nb	Hp	NaN	NaN	NaN
Nb / Hp	Q62187	Q62187	-0.774751	0.774751	0.00104483	0.00201894	12	Q62187	Ttf1	Transcription termination factor 1	TTF1_MOUSE	5	-41.5511	0.584489	Nb	Hp	NaN	NaN	NaN
Nb / Hp	Q9DBF1	Q9DBF1	2.47917	2.47917	0.00104588	0.00201989	12	Q9DBF1	Aldh7a1	Alpha-aminoadipic semialdehyde dehydrogenase	AL7A1_MOUSE	4	457.577	5.57577	Nb	Hp	NaN	NaN	NaN
Nb / Hp	P56379	P56379	-0.508623	0.508623	0.00104657	0.00202017	12	P56379	Atp5mj	ATP synthase subunit ATP5MJ, mitochondrial	ATP68_MOUSE	2	-29.7107	0.702893	Nb	Hp	NaN	NaN	NaN
Nb / Hp	P25976	P25976	-1.05309	1.05309	0.0010486	0.00202288	12	P25976	Ubtf	Nucleolar transcription factor 1	UBF1_MOUSE	32	-51.8065	0.481935	Nb	Hp	NaN	NaN	NaN
Nb / Hp	Q80XK6	Q80XK6	1.2006	1.2006	0.00104908	0.00202288	12	Q80XK6	Atg2b	Autophagy-related protein 2 homolog B	ATG2B_MOUSE	9	129.836	2.29836	Nb	Hp	NaN	NaN	NaN
Nb / Hp	Q9DC16	Q9DC16	-1.04479	1.04479	0.00105174	0.00202693	12	Q9DC16	Ergic1	Endoplasmic reticulum-Golgi intermediate compartment protein 1	ERGI1_MOUSE	11	-51.5283	0.484717	Nb	Hp	NaN	NaN	NaN
Nb / Hp	Q99LJ0	Q99LJ0	0.515574	0.515574	0.00105425	0.0020307	12	Q99LJ0	Cttnbp2nl	CTTNBP2 N-terminal-like protein	CT2NL_MOUSE	7	42.9562	1.42956	Nb	Hp	NaN	NaN	NaN
Nb / Control	Q59J78	Q59J78	-0.851814	0.851814	0.00105589	0.00203279	12	Q59J78	Ndufaf2	NADH dehydrogenase [ubiquinone] 1 alpha subcomplex assembly factor 2	NDUF2_MOUSE	12	-44.5913	0.554087	Nb	Control	NaN	NaN	NaN
Nb / Hp	Q8CJF7	Q8CJF7	-1.07048	1.07048	0.00105985	0.00203827	12	Q8CJF7	Ahctf1	Protein ELYS	ELYS_MOUSE	26	-52.384	0.47616	Nb	Hp	NaN	NaN	NaN
Nb / Hp	Q9QY36	Q9QY36	1.6082	1.6082	0.00105953	0.00203827	12	Q9QY36	Naa10	N-alpha-acetyltransferase 10	NAA10_MOUSE	7	204.87	3.0487	Nb	Hp	NaN	NaN	NaN
Nb / Control	P97287	P97287	-0.702976	0.702976	0.00106054	0.00203852	12	P97287	Mcl1	Induced myeloid leukemia cell differentiation protein Mcl-1 homolog	MCL1_MOUSE	7	-38.5696	0.614304	Nb	Control	NaN	NaN	NaN
Nb / Hp	E2JF22	E2JF22	-1.96621	1.96621	0.00106366	0.00203863	12	E2JF22	Piezo1	Piezo-type mechanosensitive ion channel component 1	PIEZ1_MOUSE	2	-74.4075	0.255925	Nb	Hp	NaN	NaN	NaN
Nb / Hp	Q8VE96	Q8VE96	-0.970843	0.970843	0.00106388	0.00203863	12	Q8VE96	Slc35f6	Solute carrier family 35 member F6	S35F6_MOUSE	3	-48.9792	0.510208	Nb	Hp	NaN	NaN	NaN
Nb / Hp	Q91WQ3	Q91WQ3	1.36916	1.36916	0.00106345	0.00203863	12	Q91WQ3	Yars1	Tyrosine--tRNA ligase, cytoplasmic	SYYC_MOUSE	27	158.319	2.58319	Nb	Hp	NaN	NaN	NaN
Nb / Control	Q91YH5	Q91YH5	-0.276211	0.276211	0.00106312	0.00203863	12	Q91YH5	Atl3	Atlastin-3	ATLA3_MOUSE	14	-17.4243	0.825757	Nb	Control	NaN	NaN	NaN
Nb / Hp	Q921V5	Q921V5	-1.21132	1.21132	0.00106265	0.00203863	12	Q921V5	Mgat2	Alpha-1,6-mannosyl-glycoprotein 2-beta-N-acetylglucosaminyltransferase	MGAT2_MOUSE	13	-56.8128	0.431872	Nb	Hp	NaN	NaN	NaN
Nb / Hp	Q9D7N3	Q9D7N3	-0.185589	0.185589	0.00106395	0.00203863	12	Q9D7N3	Mrps9	Small ribosomal subunit protein uS9m	RT09_MOUSE	18	-12.071	0.87929	Nb	Hp	NaN	NaN	NaN
Nb / Hp	Q8VC48	Q8VC48	-0.838626	0.838626	0.00106587	0.00204124	12	Q8VC48	Pex12	Peroxisome assembly protein 12	PEX12_MOUSE	4	-44.0824	0.559176	Nb	Hp	NaN	NaN	NaN
Nb / Hp	Q5SW19	Q5SW19	1.84554	1.84554	0.00106789	0.0020419	12	Q5SW19	Cluh	Clustered mitochondria protein homolog	CLU_MOUSE	26	259.386	3.59386	Nb	Hp	NaN	NaN	NaN
Nb / Hp	Q9DBZ5	Q9DBZ5	1.7311	1.7311	0.00106731	0.0020419	12	Q9DBZ5	Eif3k	Eukaryotic translation initiation factor 3 subunit K	EIF3K_MOUSE	11	231.98	3.3198	Nb	Hp	NaN	NaN	NaN
Nb / Control	Q9QWR8	Q9QWR8	-0.580441	0.580441	0.00106759	0.0020419	12	Q9QWR8	Naga	Alpha-N-acetylgalactosaminidase	NAGAB_MOUSE	7	-33.1241	0.668759	Nb	Control	NaN	NaN	NaN
Nb / Hp	P61255	P61255	0.613069	0.613069	0.00106977	0.00204443	12	P61255	Rpl26	Large ribosomal subunit protein uL24	RL26_MOUSE	11	52.951	1.52951	Nb	Hp	NaN	NaN	NaN
Nb / Control	P12382	P12382	1.66763	1.66763	0.00107163	0.00204662	12	P12382	Pfkl	ATP-dependent 6-phosphofructokinase, liver type	PFKAL_MOUSE	20	217.692	3.17692	Nb	Control	NaN	NaN	NaN
Hp / Control	P34955	P34955	1.2301	1.2301	0.00107221	0.00204662	12	NaN	SWISS-PROT:P34955	(Bos taurus) Alpha-1-antiproteinase precursor	NaN	24	134.584	2.34584	Hp	Control	NaN	NaN	NaN
Nb / Hp	Q9DCZ1	Q9DCZ1	1.67963	1.67963	0.0010726	0.00204662	12	Q9DCZ1	Gmpr	GMP reductase 1	GMPR1_MOUSE	3	220.346	3.20346	Nb	Hp	NaN	NaN	NaN
Nb / Hp	P31938	P31938	0.985406	0.985406	0.00107702	0.00205284	12	P31938	Map2k1	Dual specificity mitogen-activated protein kinase kinase 1	MP2K1_MOUSE	12	97.987	1.97987	Nb	Hp	NaN	NaN	NaN
Nb / Hp	Q8K268	Q8K268	1.52159	1.52159	0.00107754	0.00205284	12	Q8K268	Abcf3	ATP-binding cassette sub-family F member 3	ABCF3_MOUSE	7	187.108	2.87108	Nb	Hp	NaN	NaN	NaN
Nb / Control	Q99PT1	Q99PT1	1.28354	1.28354	0.00107711	0.00205284	12	Q99PT1	Arhgdia	Rho GDP-dissociation inhibitor 1	GDIR1_MOUSE	14	143.435	2.43435	Nb	Control	NaN	NaN	NaN
Nb / Hp	Q99KD5	Q99KD5	1.70072	1.70072	0.00107946	0.00205541	12	Q99KD5	Unc45a	Protein unc-45 homolog A	UN45A_MOUSE	12	225.062	3.25062	Nb	Hp	NaN	NaN	NaN
Nb / Hp	A2AJ15	A2AJ15	-0.909409	0.909409	0.00108081	0.00205692	12	A2AJ15	Man1b1	Endoplasmic reticulum mannosyl-oligosaccharide 1,2-alpha-mannosidase	MA1B1_MOUSE	15	-46.7597	0.532403	Nb	Hp	NaN	NaN	NaN
Nb / Control	Q9D136	Q9D136	-0.265723	0.265723	0.00108244	0.00205895	12	Q9D136	Ogfod3	2-oxoglutarate and iron-dependent oxygenase domain-containing protein 3	OGFD3_MOUSE	7	-16.8218	0.831782	Nb	Control	NaN	NaN	NaN
Nb / Control	Q91WK2	Q91WK2	1.74955	1.74955	0.00108377	0.0020604	12	Q91WK2	Eif3h	Eukaryotic translation initiation factor 3 subunit H	EIF3H_MOUSE	17	236.254	3.36254	Nb	Control	NaN	NaN	NaN
Nb / Hp	Q9D3P8	Q9D3P8	-1.07846	1.07846	0.00108527	0.00206219	12	Q9D3P8	Plgrkt	Plasminogen receptor (KT)	PLRKT_MOUSE	5	-52.6467	0.473533	Nb	Hp	NaN	NaN	NaN
Nb / Hp	Q8BZH4	Q8BZH4	-1.04554	1.04554	0.00108654	0.00206353	12	Q8BZH4	Pogz	Pogo transposable element with ZNF domain	POGZ_MOUSE	13	-51.5536	0.484464	Nb	Hp	NaN	NaN	NaN
Nb / Control	P98195	P98195	-0.724141	0.724141	0.00108843	0.00206604	12	P98195	Atp9b	Probable phospholipid-transporting ATPase IIB	ATP9B_MOUSE	9	-39.4642	0.605358	Nb	Control	NaN	NaN	NaN
Nb / Hp	O09111	O09111	-1.38264	1.38264	0.00109661	0.00207865	12	O09111	Ndufb11	NADH dehydrogenase [ubiquinone] 1 beta subcomplex subunit 11, mitochondrial	NDUBB_MOUSE	4	-61.6484	0.383516	Nb	Hp	NaN	NaN	NaN
Nb / Hp	Q3TYS2	Q3TYS2	-0.636231	0.636231	0.00109677	0.00207865	12	Q3TYS2	Cybc1	Cytochrome b-245 chaperone 1	CYBC1_MOUSE	6	-35.6608	0.643392	Nb	Hp	NaN	NaN	NaN
Nb / Hp	Q9ERS2	Q9ERS2	-1.26169	1.26169	0.00109678	0.00207865	12	Q9ERS2	Ndufa13	NADH dehydrogenase [ubiquinone] 1 alpha subcomplex subunit 13	NDUAD_MOUSE	7	-58.2945	0.417055	Nb	Hp	NaN	NaN	NaN
Nb / Hp	Q9D8Z1	Q9D8Z1	2.04592	2.04592	0.00109995	0.00208358	12	Q9D8Z1	Ascc1	Activating signal cointegrator 1 complex subunit 1	ASCC1_MOUSE	2	312.936	4.12936	Nb	Hp	NaN	NaN	NaN
Nb / Control	Q91VE6	Q91VE6	-1.68079	1.68079	0.00110859	0.00209886	12	Q91VE6	Nifk	MKI67 FHA domain-interacting nucleolar phosphoprotein	MK67I_MOUSE	20	-68.8088	0.311912	Nb	Control	NaN	NaN	NaN
Nb / Control	Q03247	Q03247	-3.55434	3.55434	0.00111041	0.00209904	12	NaN	SWISS-PROT:Q03247	(Bos taurus) Apolipoprotein E precursor	NaN	14	-91.4879	0.0851213	Nb	Control	NaN	NaN	NaN
Nb / Control	Q60668	Q60668	0.919776	0.919776	0.00110975	0.00209904	12	Q60668	Hnrnpd	Heterogeneous nuclear ribonucleoprotein D0	HNRPD_MOUSE	18	89.1822	1.89182	Nb	Control	NaN	NaN	NaN
Nb / Hp	Q8K482	Q8K482	-0.732935	0.732935	0.00111034	0.00209904	12	Q8K482	Emilin2	EMILIN-2	EMIL2_MOUSE	6	-39.8321	0.601679	Nb	Hp	NaN	NaN	NaN
Nb / Control	P29391	P29391	1.89267	1.89267	0.00111288	0.00210262	12	P29391	Ftl1	Ferritin light chain 1	FRIL1_MOUSE	10	271.321	3.71321	Nb	Control	NaN	NaN	NaN
Nb / Control	Q8VBT0	Q8VBT0	-0.773892	0.773892	0.00111945	0.00211393	12	Q8VBT0	Tmx1	Thioredoxin-related transmembrane protein 1	TMX1_MOUSE	11	-41.5162	0.584838	Nb	Control	NaN	NaN	NaN
Nb / Hp	Q3TBD2	Q3TBD2	0.950408	0.950408	0.0011233	0.00211901	12	Q3TBD2	Arhgap45	Rho GTPase-activating protein 45	HMHA1_MOUSE	18	93.2419	1.93242	Nb	Hp	NaN	NaN	NaN
Nb / Control	Q8R016	Q8R016	1.70831	1.70831	0.00112315	0.00211901	12	Q8R016	Blmh	Bleomycin hydrolase	BLMH_MOUSE	14	226.778	3.26778	Nb	Control	NaN	NaN	NaN
Nb / Hp	P97449	P97449	-0.515986	0.515986	0.00112444	0.00212007	12	P97449	Anpep	Aminopeptidase N	AMPN_MOUSE	18	-30.0685	0.699315	Nb	Hp	NaN	NaN	NaN
Nb / Control	Q05910	Q05910	-1.29304	1.29304	0.00112946	0.00212844	12	Q05910	Adam8	Disintegrin and metalloproteinase domain-containing protein 8	ADAM8_MOUSE	3	-59.191	0.40809	Nb	Control	NaN	NaN	NaN
Nb / Hp	Q9N2I2	Q9N2I2	-2.064	2.064	0.00113033	0.00212898	12	NaN	SWISS-PROT:Q9N2I2	(Bos taurus) Plasma serine protease inhibitor precursor	NaN	5	-76.0848	0.239152	Nb	Hp	NaN	NaN	NaN
Nb / Control	Q8BVY0	Q8BVY0	-1.66345	1.66345	0.00113453	0.0021358	12	Q8BVY0	Rsl1d1	Ribosomal L1 domain-containing protein 1	RL1D1_MOUSE	29	-68.4317	0.315683	Nb	Control	NaN	NaN	NaN
Nb / Control	Nippo_chrIV.g10717.t1;Nippo_chrIV.g10717.t2;Nippo_chrIV.g10717.t3	Nippo_chrIV.g10717.t1;Nippo_chrIV.g10717.t2;Nippo_chrIV.g10717.t3	1.42456	1.42456	0.00113803	0.00213908	12	NaN	transcript=Nippo_chrIV.g10717.t1;transcript=Nippo_chrIV.g10717.t2;transcript=Nippo_chrIV.g10717.t3	gene=Nippo_chrIV.g10717	NaN	2	168.433	2.68433	Nb	Control	NaN	NaN	NaN
Nb / Hp	Q61206	Q61206	2.63768	2.63768	0.00113802	0.00213908	12	Q61206	Pafah1b2	Platelet-activating factor acetylhydrolase IB subunit alpha2	PA1B2_MOUSE	2	522.33	6.2233	Nb	Hp	NaN	NaN	NaN
Nb / Control	Q9CRB9	Q9CRB9	-1.17717	1.17717	0.00113784	0.00213908	12	Q9CRB9	Chchd3	MICOS complex subunit Mic19	MIC19_MOUSE	17	-55.7782	0.442218	Nb	Control	NaN	NaN	NaN
Nb / Control	P07724	P07724	-2.09415	2.09415	0.00113992	0.00214152	12	P07724	Alb	Albumin	ALBU_MOUSE	2	-76.5795	0.234205	Nb	Control	NaN	NaN	NaN
Nb / Hp	Q9CPT3	Q9CPT3	2.5524	2.5524	0.00114214	0.00214459	12	Q9CPT3	Nanp	N-acylneuraminate-9-phosphatase	NANP_MOUSE	2	486.608	5.86608	Nb	Hp	NaN	NaN	NaN
Nb / Hp	Q922H1	Q922H1	1.82991	1.82991	0.00114437	0.00214657	12	Q922H1	Prmt3	Protein arginine N-methyltransferase 3	ANM3_MOUSE	8	255.515	3.55515	Nb	Hp	NaN	NaN	NaN
Nb / Control	Q9CXW3	Q9CXW3	1.67698	1.67698	0.00114428	0.00214657	12	Q9CXW3	Cacybp	Calcyclin-binding protein	CYBP_MOUSE	19	219.759	3.19759	Nb	Control	NaN	NaN	NaN
Nb / Control	P61358	P61358	0.314311	0.314311	0.00115298	0.00216051	12	P61358	Rpl27	Large ribosomal subunit protein eL27	RL27_MOUSE	12	24.3418	1.24342	Nb	Control	NaN	NaN	NaN
Nb / Hp	Q8C9B9	Q8C9B9	-1.18463	1.18463	0.00115255	0.00216051	12	Q8C9B9	Dido1	Death-inducer obliterator 1	DIDO1_MOUSE	25	-56.0063	0.439937	Nb	Hp	NaN	NaN	NaN
Nb / Hp	Q91WM3	Q91WM3	-0.796946	0.796946	0.0011538	0.00216093	12	Q91WM3	Rrp9	U3 small nucleolar RNA-interacting protein 2	U3IP2_MOUSE	12	-42.4434	0.575566	Nb	Hp	NaN	NaN	NaN
Nb / Hp	Q8R5A6	Q8R5A6	0.758527	0.758527	0.00115491	0.0021619	12	Q8R5A6	Tbc1d22a	TBC1 domain family member 22A	TB22A_MOUSE	3	69.1763	1.69176	Nb	Hp	NaN	NaN	NaN
Nb / Control	P24288	P24288	1.25915	1.25915	0.00115584	0.00216254	12	P24288	Bcat1	Branched-chain-amino-acid aminotransferase, cytosolic	BCAT1_MOUSE	8	139.354	2.39354	Nb	Control	NaN	NaN	NaN
Nb / Hp	Q91YP2	Q91YP2	0.864839	0.864839	0.00115671	0.00216306	12	Q91YP2	Nln	Neurolysin, mitochondrial	NEUL_MOUSE	12	82.1136	1.82114	Nb	Hp	NaN	NaN	NaN
Nb / Hp	P99024	P99024	1.43224	1.43224	0.00115731	0.00216307	12	P99024	Tubb5	Tubulin beta-5 chain	TBB5_MOUSE	6	169.866	2.69866	Nb	Hp	NaN	NaN	NaN
Nb / Hp	Q99KK7	Q99KK7	2.23349	2.23349	0.00116014	0.00216725	12	Q99KK7	Dpp3	Dipeptidyl peptidase 3	DPP3_MOUSE	16	370.271	4.70271	Nb	Hp	NaN	NaN	NaN
Nb / Hp	P70704	P70704	-1.10386	1.10386	0.00116087	0.00216751	12	P70704	Atp8a1	Phospholipid-transporting ATPase IA	AT8A1_MOUSE	4	-53.4729	0.465271	Nb	Hp	NaN	NaN	NaN
Nb / Hp	Q9CQS2	Q9CQS2	-1.53959	1.53959	0.00116176	0.00216806	12	Q9CQS2	Nop10	H/ACA ribonucleoprotein complex subunit 3	NOP10_MOUSE	6	-65.6016	0.343984	Nb	Hp	NaN	NaN	NaN
Nb / Control	Q91YK2	Q91YK2	-1.61046	1.61046	0.00116587	0.00217462	12	Q91YK2	Rrp1b	Ribosomal RNA processing protein 1 homolog B	RRP1B_MOUSE	24	-67.2506	0.327494	Nb	Control	NaN	NaN	NaN
Nb / Control	O54950	O54950	1.79072	1.79072	0.00116657	0.00217483	12	O54950	Prkag1	5'-AMP-activated protein kinase subunit gamma-1	AAKG1_MOUSE	5	245.988	3.45988	Nb	Control	NaN	NaN	NaN
Nb / Hp	P0C7N9	P0C7N9	2.92512	2.92512	0.00116899	0.00217711	12	P0C7N9	Psmg4	Proteasome assembly chaperone 4	PSMG4_MOUSE	2	659.536	7.59536	Nb	Hp	NaN	NaN	NaN
Nb / Control	Q9DB73	Q9DB73	-0.680655	0.680655	0.00116899	0.00217711	12	Q9DB73	Cyb5r1	NADH-cytochrome b5 reductase 1	NB5R1_MOUSE	18	-37.6118	0.623882	Nb	Control	NaN	NaN	NaN
Nb / Hp	P17183	P17183	1.05158	1.05158	0.00117572	0.00218774	12	P17183	Eno2	Gamma-enolase	ENOG_MOUSE	3	107.28	2.0728	Nb	Hp	NaN	NaN	NaN
Nb / Hp	Q9D6N1	Q9D6N1	3.1195	3.1195	0.0011759	0.00218774	12	Q9D6N1	Ca13	Carbonic anhydrase 13	CAH13_MOUSE	2	769.085	8.69085	Nb	Hp	NaN	NaN	NaN
Nb / Hp	P35550	P35550	-0.896496	0.896496	0.00118028	0.00219479	12	P35550	Fbl	rRNA 2'-O-methyltransferase fibrillarin	FBRL_MOUSE	21	-46.281	0.53719	Nb	Hp	NaN	NaN	NaN
Nb / Control	P50096	P50096	1.27825	1.27825	0.0011837	0.00220002	12	P50096	Impdh1	Inosine-5'-monophosphate dehydrogenase 1	IMDH1_MOUSE	12	142.545	2.42545	Nb	Control	NaN	NaN	NaN
Nb / Hp	P53811	P53811	1.52012	1.52012	0.00118525	0.00220177	12	P53811	Pitpnb	Phosphatidylinositol transfer protein beta isoform	PIPNB_MOUSE	7	186.814	2.86814	Nb	Hp	NaN	NaN	NaN
Nb / Hp	P40630	P40630	-1.53236	1.53236	0.00118646	0.00220291	12	P40630	Tfam	Transcription factor A, mitochondrial	TFAM_MOUSE	11	-65.429	0.34571	Nb	Hp	NaN	NaN	NaN
Nb / Control	Q80SW1	Q80SW1	1.61211	1.61211	0.00118791	0.00220411	12	Q80SW1	Ahcyl1	S-adenosylhomocysteine hydrolase-like protein 1	SAHH2_MOUSE	8	205.698	3.05698	Nb	Control	NaN	NaN	NaN
Nb / Control	Q8BYH7	Q8BYH7	1.83184	1.83184	0.00118831	0.00220411	12	Q8BYH7	Tbc1d17	TBC1 domain family member 17	TBC17_MOUSE	3	255.991	3.55991	Nb	Control	NaN	NaN	NaN
Nb / Hp	Q64735	Q64735	-0.490422	0.490422	0.00119601	0.0022171	12	Q64735	Cr1l	Complement component receptor 1-like protein	CR1L_MOUSE	8	-28.8183	0.711817	Nb	Hp	NaN	NaN	NaN
Nb / Control	Q8BNW9	Q8BNW9	1.76606	1.76606	0.00119653	0.0022171	12	Q8BNW9	Kbtbd11	Kelch repeat and BTB domain-containing protein 11	KBTBB_MOUSE	7	240.125	3.40125	Nb	Control	NaN	NaN	NaN
Nb / Control	Q6ZWX6	Q6ZWX6	1.45102	1.45102	0.00120186	0.00221755	12	Q6ZWX6	Eif2s1	Eukaryotic translation initiation factor 2 subunit 1	IF2A_MOUSE	28	173.401	2.73401	Nb	Control	NaN	NaN	NaN
Nb / Hp	Q8VDI9	Q8VDI9	-0.738225	0.738225	0.00119921	0.00221755	12	Q8VDI9	Alg9	Alpha-1,2-mannosyltransferase ALG9	ALG9_MOUSE	7	-40.0523	0.599477	Nb	Hp	NaN	NaN	NaN
Nb / Hp	Q91X88	Q91X88	-1.10956	1.10956	0.00120277	0.00221755	12	Q91X88	Pomgnt1	Protein O-linked-mannose beta-1,2-N-acetylglucosaminyltransferase 1	PMGT1_MOUSE	3	-53.6564	0.463436	Nb	Hp	NaN	NaN	NaN
Nb / Hp	Q91YU8	Q91YU8	-0.741785	0.741785	0.00119969	0.00221755	12	Q91YU8	Ppan	Suppressor of SWI4 1 homolog	SSF1_MOUSE	15	-40.2001	0.597999	Nb	Hp	NaN	NaN	NaN
Nb / Hp	Q923G2	Q923G2	0.897098	0.897098	0.00120225	0.00221755	12	Q923G2	Polr2h	DNA-directed RNA polymerases I, II, and III subunit RPABC3	RPAB3_MOUSE	5	86.2316	1.86232	Nb	Hp	NaN	NaN	NaN
Nb / Control	Q99KP6	Q99KP6	-0.383033	0.383033	0.00120226	0.00221755	12	Q99KP6	Prpf19	Pre-mRNA-processing factor 19	PRP19_MOUSE	22	-23.3176	0.766824	Nb	Control	NaN	NaN	NaN
Nb / Control	Q9CY73	Q9CY73	-0.469657	0.469657	0.00119835	0.00221755	12	Q9CY73	Mrpl44	Large ribosomal subunit protein mL44	RM44_MOUSE	10	-27.7864	0.722136	Nb	Control	NaN	NaN	NaN
Nb / Hp	Q9D7X3	Q9D7X3	1.24858	1.24858	0.00120229	0.00221755	12	Q9D7X3	Dusp3	Dual specificity protein phosphatase 3	DUS3_MOUSE	4	137.608	2.37608	Nb	Hp	NaN	NaN	NaN
Nb / Hp	Q9DBN5	Q9DBN5	-0.659391	0.659391	0.00120167	0.00221755	12	Q9DBN5	Lonp2	Lon protease homolog 2, peroxisomal	LONP2_MOUSE	16	-36.6854	0.633146	Nb	Hp	NaN	NaN	NaN
Nb / Control	Q9ESX5	Q9ESX5	-0.580716	0.580716	0.00120284	0.00221755	12	Q9ESX5	Dkc1	H/ACA ribonucleoprotein complex subunit DKC1	DKC1_MOUSE	20	-33.1368	0.668632	Nb	Control	NaN	NaN	NaN
Nb / Hp	Q3U1Y4	Q3U1Y4	1.81151	1.81151	0.00120406	0.00221868	12	Q3U1Y4	Dennd4b	DENN domain-containing protein 4B	DEN4B_MOUSE	5	251.01	3.5101	Nb	Hp	NaN	NaN	NaN
Nb / Control	P70452	P70452	-0.82799	0.82799	0.00120594	0.00222003	12	P70452	Stx4	Syntaxin-4	STX4_MOUSE	6	-43.6686	0.563314	Nb	Control	NaN	NaN	NaN
Nb / Hp	Q9JLJ2	Q9JLJ2	1.85545	1.85545	0.00120601	0.00222003	12	Q9JLJ2	Aldh9a1	4-trimethylaminobutyraldehyde dehydrogenase	AL9A1_MOUSE	21	261.864	3.61864	Nb	Hp	NaN	NaN	NaN
Nb / Hp	Q8VDQ1	Q8VDQ1	2.18128	2.18128	0.00120891	0.00222426	12	Q8VDQ1	Ptgr2	Prostaglandin reductase 2	PTGR2_MOUSE	6	353.555	4.53555	Nb	Hp	NaN	NaN	NaN
Nb / Control	O35685	O35685	1.68511	1.68511	0.00121202	0.00222517	12	O35685	Nudc	Nuclear migration protein nudC	NUDC_MOUSE	22	221.564	3.21564	Nb	Control	NaN	NaN	NaN
Nb / Hp	P13808	P13808	-1.19473	1.19473	0.00121068	0.00222517	12	P13808	Slc4a2	Anion exchange protein 2	B3A2_MOUSE	4	-56.3133	0.436867	Nb	Hp	NaN	NaN	NaN
Nb / Control	P62827	P62827	0.911002	0.911002	0.00121069	0.00222517	12	P62827	Ran	GTP-binding nuclear protein Ran	RAN_MOUSE	12	88.0351	1.88035	Nb	Control	NaN	NaN	NaN
Nb / Hp	Q6R5N8	Q6R5N8	-1.10733	1.10733	0.00121246	0.00222517	12	Q6R5N8	Tlr13	Toll-like receptor 13	TLR13_MOUSE	9	-53.5847	0.464153	Nb	Hp	NaN	NaN	NaN
Nb / Hp	Q9DBS1	Q9DBS1	-1.09012	1.09012	0.00121133	0.00222517	12	Q9DBS1	Tmem43	Transmembrane protein 43	TMM43_MOUSE	22	-53.0279	0.469721	Nb	Hp	NaN	NaN	NaN
Nb / Hp	Q9R1C6	Q9R1C6	-1.35652	1.35652	0.00121547	0.00222958	12	Q9R1C6	Dgke	Diacylglycerol kinase epsilon	DGKE_MOUSE	2	-60.9477	0.390523	Nb	Hp	NaN	NaN	NaN
Nb / Hp	Q9ER00	Q9ER00	-1.08092	1.08092	0.001217	0.00223126	12	Q9ER00	Stx12	Syntaxin-12	STX12_MOUSE	8	-52.7272	0.472728	Nb	Hp	NaN	NaN	NaN
Nb / Hp	P29391	P29391	2.09033	2.09033	0.00121805	0.00223208	12	P29391	Ftl1	Ferritin light chain 1	FRIL1_MOUSE	10	325.846	4.25846	Nb	Hp	NaN	NaN	NaN
Nb / Hp	Q8VHH5	Q8VHH5	1.32115	1.32115	0.00122349	0.00224092	12	Q8VHH5	Agap3	Arf-GAP with GTPase, ANK repeat and PH domain-containing protein 3	AGAP3_MOUSE	5	149.865	2.49865	Nb	Hp	NaN	NaN	NaN
Nb / Hp	Q80YR5	Q80YR5	-0.693997	0.693997	0.00122515	0.00224283	12	Q80YR5	Safb2	Scaffold attachment factor B2	SAFB2_MOUSE	13	-38.1861	0.618139	Nb	Hp	NaN	NaN	NaN
Nb / Hp	Q920L1	Q920L1	-1.24077	1.24077	0.00122879	0.00224838	12	Q920L1	Fads1	Acyl-CoA (8-3)-desaturase	FADS1_MOUSE	15	-57.6852	0.423148	Nb	Hp	NaN	NaN	NaN
Nb / Hp	O35381	O35381	0.962041	0.962041	0.00123427	0.00225727	12	O35381	Anp32a	Acidic leucine-rich nuclear phosphoprotein 32 family member A	AN32A_MOUSE	10	94.8064	1.94806	Nb	Hp	NaN	NaN	NaN
Nb / Control	P58742	P58742	-1.02184	1.02184	0.0012355	0.00225839	12	P58742	Aaas	Aladin	AAAS_MOUSE	13	-50.7513	0.492487	Nb	Control	NaN	NaN	NaN
[truncated: 10,844 more rows]
